# Supplementary material for: Inherently chiral nor-heteracalixarenes: design and synthesis via enantioselective intramolecular Suzuki–Miyaura reaction
Source: Royal Society of Chemistry journal article supplement (doi:10.1039/d4sc03506b), 2024-01-01
Supplement: d4sc03506b1.pdf [file d4sc03506b1.pdf]

## Supporting Information

# Inherently Chiral *Nor*-Heteracalixarenes: Design and Synthesis via Enantioselective Intramolecular Suzuki-Miyaura Reaction

Yi-Fan Jiang, Shuo Tong\*, Jieping Zhu, Mei-Xiang Wang

Correspondence to: [tongshuo@mail.tsinghua.edu.cn](mailto:tongshuo@mail.tsinghua.edu.cn)

## Table of Contents

|                                                                                           |      |
|-------------------------------------------------------------------------------------------|------|
| 1. General information .....                                                              | S2   |
| 2. Synthesis of <i>Monomer</i> .....                                                      | S4   |
| 3. Synthesis of <i>Dimer</i> .....                                                        | S16  |
| 4. Synthesis of tetramer <b>6a-6aa</b> and <b>6ad</b> .....                               | S20  |
| 5. Synthesis of tetramer <b>6ab</b> .....                                                 | S40  |
| 6. Synthesis of tetramer <b>6ac</b> .....                                                 | S42  |
| 7. Synthesis of racemic <b>5</b> .....                                                    | S44  |
| 8. Catalytic enantioselective synthesis of <b>5</b> .....                                 | S45  |
| 9. Inversion barrier test .....                                                           | S74  |
| 10. Synthesis and measurement of kinetics of racemization of enantiomers <b>5ae</b> ..... | S77  |
| 11. Crystallographic data .....                                                           | S84  |
| 12. Copies of UV-vis spectra and fluorescence spectra.....                                | S90  |
| 13. Copies of CD and CPL spectra .....                                                    | S99  |
| 14. References.....                                                                       | S108 |
| 15. Copies of <sup>1</sup> H and <sup>13</sup> C NMR spectra .....                        | S109 |
| 16. Copies of HPLC chromatograms .....                                                    | S189 |

## 1. General information

NMR spectra were recorded on a JEOL ECX-400 400 MHz NMR spectrometers.  $^1\text{H}$  NMR chemical shifts were reported relative to residual  $\text{CDCl}_3$  (7.26 ppm), acetone- $d_6$  (2.09 ppm), tetrachloroethane- $d_2$  (6.00 ppm) or  $\text{DMSO-}d_6$  (2.50 ppm).  $^{13}\text{C}$  NMR chemical shifts were reported relative to the central line of  $\text{CDCl}_3$  (77.16 ppm), acetone- $d_6$  (29.84 ppm), tetrachloroethane- $d_2$  (73.78 ppm) or  $\text{DMSO-}d_6$  (39.52 ppm). Abbreviations are used in the description of NMR data as follows: chemical shift ( $\delta$ , ppm), multiplicity (s = singlet, d = doublet, t = triplet, q = quartet, dd = doublet of doublets, m = multiplet, and br = broad), coupling constant ( $J$ , Hz). The high resolution mass spectra (HRMS) were recorded on a GCT-MS Micromass UK spectrometer or a microTOF-Q spectrometer. Infrared spectra were recorded using a PerkinElmer Spectrum 100 FT-IR spectrometer with KBr pellets in the 4000-400  $\text{cm}^{-1}$  region. All yields reported were isolated yields. Enantiomeric excesses were determined by HPLC using Daicel chiral stationary phase columns by comparing the samples with the appropriate racemic samples at 25  $^\circ\text{C}$ , column and elution details specified in each entry. The optical rotation was determined by Rudolph Autopol VI Automatic polarimeter. Melting points were uncorrected.

Unless otherwise stated, reagents and solvents were purchased from commercial sources and preserved under argon. More sensitive compounds were stored in a desiccator or glove box if required. Reagents were used without further purification unless otherwise noted. All reactions were performed under argon (or nitrogen) and stirring unless otherwise noted. When needed oven-dried glassware was used ( $T^\circ > 100$   $^\circ\text{C}$ ) or under vacuum with a heat gun ( $T^\circ > 200$   $^\circ\text{C}$ ). Anhydrous solvents were purified and dried following standard procedures. Reactions were monitored by thin layer chromatography (TLC) using Merck TLC silica gel 60 F254. Compounds were visualized by UV-light 254 nm and by dipping the plates in an ethanolic phosphomolybdic acid solution followed by heating. Flash column chromatography was performed over silica gel (230-400 mesh).

**Optical properties:** Optical properties were recorded in chromatographic grade acetonitrile. UV-vis absorption spectra were recorded using an Agilent® Cary-5000 UV-vis spectrophotometer at room temperature. Electronic circular dichroism (ECD) spectra were recorded on a JASCO J-815 spectropolarimeter at room temperature in a 1 cm-cuvette. Fluorescence spectra were recorded using an Agilent® Eclipse fluorescence spectrophotometer. Fluorescence quantum yields  $\Phi$  were measured in diluted solution with an optical density lower than 0.05 using the following equation:

$$\frac{\Phi_x}{\Phi_r} = \frac{A_r(\lambda)}{A_x(\lambda)} \times \frac{n_x^2}{n_r^2} \times \frac{D_x}{D_r}$$

Where A is the absorbance at the excitation wavelength ( $\lambda$ ), n the refractive index and D the integrated intensity. r and x stand for reference and sample respectively. The fluorescence quantum yields were measured in solution relative to 2-aminopyridine ( $\Phi = 60.0\%$  in 0.1 N H<sub>2</sub>SO<sub>4</sub>). Excitation of reference and sample compounds was performed at the same wavelength.

The circularly polarized luminescence (CPL) spectra were recorded with a JASCO CPL-200 spectrometer at room temperature.

## 2. Synthesis of *Monomer*

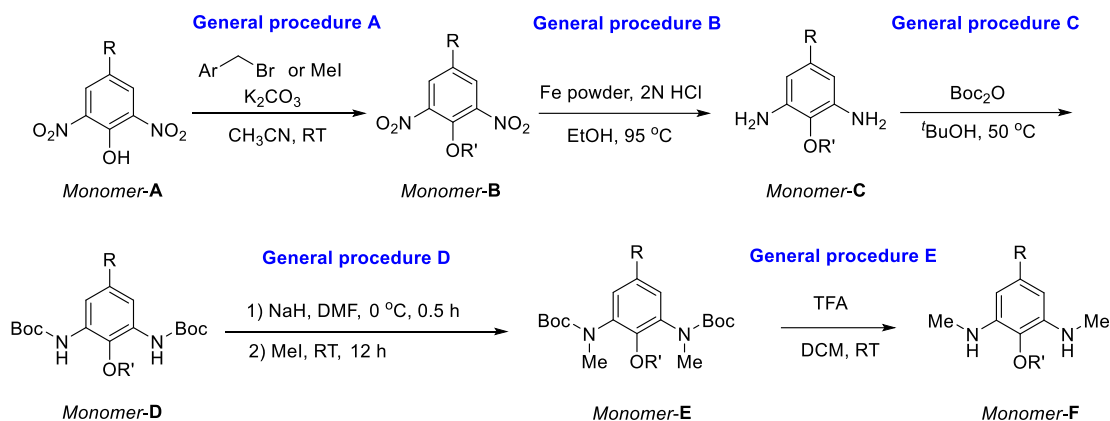

Dinitro compounds (*Monomer-A*) are obtained through the nitration reaction of phenol according to reference.<sup>1</sup>

**General procedure A:** *Monomer-A* (30 mmol) and K<sub>2</sub>CO<sub>3</sub> (6.2g, 45 mmol, 1.5 equiv) were put into a 500 mL two-necked round bottom flask under N<sub>2</sub> atmosphere. Then CH<sub>3</sub>CN (150 mL) and benzyl bromide (36 mmol, 1.2 equiv) were added and the solution was stirred at refluxing temperature overnight. The reaction was quenched with water and extracted with EtOAc. The combined organic layers were washed with brine and dried over anhydrous Na<sub>2</sub>SO<sub>4</sub>. After solvent evaporation, pure *Monomer-B* was obtained by recrystallization.

### 5-(*tert*-butyl)-2-((3-methylbenzyl)oxy)-1,3-dinitrobenzene (*Monomer-B1*)

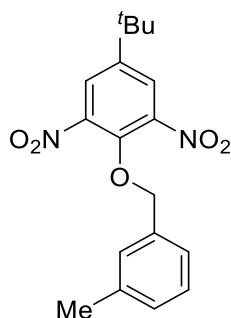

Chemical Formula: C<sub>18</sub>H<sub>20</sub>N<sub>2</sub>O<sub>5</sub>; Molecular Weight: 344.3670

8.3 g, 80% yield, yellow solid. M.P. = 86-87 °C

<sup>1</sup>H NMR (400 MHz, CDCl<sub>3</sub>) δ 8.03 (s, 2H), 7.28 (m, 3H), 7.19 (m, 1H), 5.16 (s, 2H),



2.38 (s, 3H), 1.38 (s, 9H).  $^{13}\text{C}$  NMR (100 MHz,  $\text{CDCl}_3$ )  $\delta$  148.9, 145.6, 143.6, 138.5, 134.8, 129.9, 128.7, 126.4, 126.3, 79.3, 35.4, 30.9, 21.5. IR (KBr)  $\nu$  2973, 2873, 1812, 1535, 1349, 1286, 956, 893, 719. HRMS (APCI)  $m/z$  Calcd. for  $\text{C}_{18}\text{H}_{19}\text{N}_2\text{O}_5^-$   $[\text{M}-\text{H}]^-$  343.1299; Found: 343.1288.

**5-(tert-butyl)-2-((4-fluorobenzyl)oxy)-1,3-dinitrobenzene (Monomer-B2)**

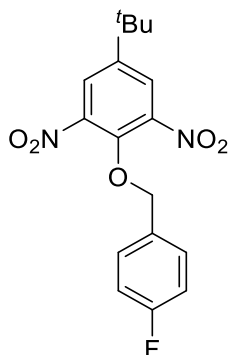

Chemical Formula:  $\text{C}_{17}\text{H}_{17}\text{FN}_2\text{O}_5$ ; Molecular Weight: 348.3304

8.3 g, 80% yield, yellow solid. M.P. = 90-91 °C

$^1\text{H}$  NMR (400 MHz,  $\text{CDCl}_3$ )  $\delta$  8.05 (s, 2H), 7.49-7.46 (m, 2H), 7.12-7.06 (m, 2H), 5.17 (s, 2H), 1.39 (s, 9H).  $^{13}\text{C}$  NMR (100 MHz,  $\text{CDCl}_3$ )  $\delta$  163.2 (d,  $J = 247$  Hz), 149.2, 145.5, 143.3, 131.3 (d,  $J = 8$  Hz), 130.8 (d,  $J = 3$  Hz), 126.5, 115.7 (d,  $J = 21$  Hz), 78.3, 35.4, 30.9. IR (KBr)  $\nu$  2962, 1897, 1532, 1367, 1225, 894, 817, 720. HRMS (APCI)  $m/z$  Calcd. for  $\text{C}_{17}\text{H}_{16}\text{FN}_2\text{O}_5^-$   $[\text{M}-\text{H}]^-$  347.1049; Found: 347.1039.

**5-(tert-butyl)-2-methoxy-1,3-dinitrobenzene (Monomer-B3)**

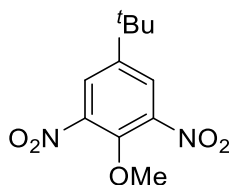

Chemical Formula:  $\text{C}_{11}\text{H}_{14}\text{N}_2\text{O}_5$ ; Molecular Weight: 254.0903

6.1 g, 80% yield, yellow solid. M.P. = 86-87 °C

$^1\text{H}$  NMR (400 MHz,  $\text{CDCl}_3$ )  $\delta$  8.02 (s, 2H), 4.04 (s, 3H), 1.37 (s, 9H).  $^{13}\text{C}$  NMR (100 MHz,  $\text{CDCl}_3$ )  $\delta$  148.6, 145.3, 145.1, 126.3, 64.8, 35.3, 31.0. IR (KBr)  $\nu$  2962, 2874,

1602, 1531, 1367, 1287, 962, 894, 720. **HRMS** (ESI)  $m/z$  Calcd. for  $C_{11}H_{15}N_2O_5^+$   $[M+H]^+$  255.0975; Found: 255.0934.

**General procedure B:** To a sealed tube was added *Monomer-B* (2 mmol), Fe powder (1.1 g, 20 mmol, 10 equiv),  $H_2O$  (2.5 mL), concentrated HCl (12 N, 0.1 mL), and EtOH (10 mL). The reaction mixture was heated to 95 °C and reacted for 3 h. The reaction was cooled to room temperature, filtered through celite and the filtrate was evaporated under vacuum. The residue was resolved in DCM, washed with brine and dried over anhydrous  $Na_2SO_4$ . After solvent evaporation, the residue was subjected to column chromatography on silica gel (PE/EtOAc = 10:1) to give the desired product *Monomer-C*.

**5-(*tert*-butyl)-2-((3-methylbenzyl)oxy)benzene-1,3-diamine (*Monomer-C1*)**

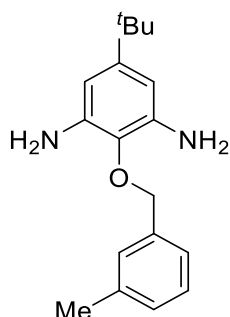

Chemical Formula:  $C_{18}H_{24}N_2O$ ; Molecular Weight: 284.4030

403.8 mg, 71% yield, white solid. M.P. = 110-111 °C.

$^1H$  NMR (400 MHz,  $CDCl_3$ )  $\delta$  7.33-7.31 (m, 3H), 7.20-7.19 (m, 1H), 6.27 (s, 2H), 4.88 (s, 2H), 3.66 (br s, 4H), 2.42 (s, 3H), 1.28 (s, 9H).  $^{13}C$  NMR (100 MHz,  $CDCl_3$ )  $\delta$  148.3, 139.5, 138.4, 137.8, 132.1, 128.9, 128.8, 128.6, 125.2, 104.1, 73.0, 34.4, 31.5, 21.5. **IR** (KBr)  $\nu$  3413, 3318, 2959, 1615, 1435, 1108, 1027, 887, 833, 751. **HRMS** (ESI)  $m/z$  Calcd. for  $C_{18}H_{25}N_2O^+$   $[M+H]^+$  285.1961; Found: 285.1964.

**5-(*tert*-butyl)-2-((4-fluorobenzyl)oxy)benzene-1,3-diamine (*Monomer-C2*)**

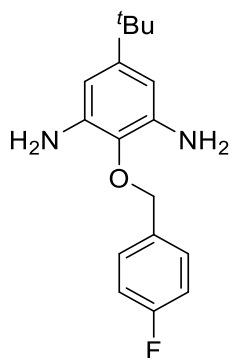

Chemical Formula: C<sub>17</sub>H<sub>21</sub>FN<sub>2</sub>O; Molecular Weight: 288.3664

420.5 mg, 73% yield, white solid. M.P. = 92-93 °C.

<sup>1</sup>H NMR (400 MHz, CDCl<sub>3</sub>) δ 7.46-7.43 (m, 2H), 7.10-7.06 (m, 2H), 6.25 (s, 2H), 4.86 (s, 2H), 3.77 (br s, 4H), 1.25 (s, 9H). <sup>13</sup>C NMR (100 MHz, CDCl<sub>3</sub>) δ 163.3 (d, *J* = 247 Hz), 149.2, 145.6, 143.4, 131.3 (d, *J* = 8 Hz), 130.9 (d, *J* = 4 Hz), 126.5, 115.8 (d, *J* = 21 Hz), 78.4, 35.4, 31.0. IR (KBr) ν 3462, 3373, 2951, 1610, 1519, 1207, 968, 807, 784. HRMS (APCI) *m/z* Calcd. for C<sub>17</sub>H<sub>22</sub>FN<sub>2</sub>O<sup>+</sup> [M+H]<sup>+</sup> 289.1711; Found: 289.1717.

**5-(tert-butyl)-2-methoxybenzene-1,3-diamine (Monomer-C3)**

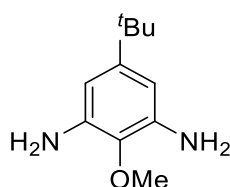

Chemical Formula: C<sub>11</sub>H<sub>18</sub>N<sub>2</sub>O; Molecular Weight: 194.2780

272.0 mg, 70% yield, white solid. M.P. = 90-91 °C.

<sup>1</sup>H NMR (400 MHz, CDCl<sub>3</sub>) δ 6.28 (s, 2H), 4.07 (br s, 4H), 3.77 (s, 3H), 1.24 (s, 9H). <sup>13</sup>C NMR (100 MHz, CDCl<sub>3</sub>) δ 148.3, 138.9, 133.2, 104.5, 58.8, 34.4, 31.5. IR (KBr) ν 3355, 2958, 2924, 1729, 1538, 1378, 1260, 1050, 807, 782. HRMS (ESI) *m/z* Calcd. for C<sub>11</sub>H<sub>19</sub>N<sub>2</sub>O<sup>+</sup> [M+H]<sup>+</sup> 195.1492; Found: 195.1492.

**5-(tert-butyl)-2-ethoxybenzene-1,3-diamine (Monomer-C4)**

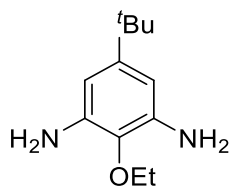

Chemical Formula: C<sub>12</sub>H<sub>20</sub>N<sub>2</sub>O; Molecular Weight: 208.3050

307.8 mg, 74% yield, white solid. M.P. = 88-89 °C.

<sup>1</sup>H NMR (400 MHz, CDCl<sub>3</sub>) δ 6.22 (s, 2H), 3.94 (q, *J* = 8.0 Hz, 2H), 3.46 (br s, 4H), 1.40 (t, *J* = 8.0 Hz, 3H) 1.24 (s, 9H). <sup>13</sup>C NMR (100 MHz, CDCl<sub>3</sub>) δ 148.1, 139.5, 132.1, 104.1, 66.9, 34.4, 31.5, 16.2. IR (KBr) ν 3414, 3318, 3198, 2959, 1615, 1361, 1221, 1026, 887, 847. HRMS (APCI) *m/z* Calcd. for C<sub>12</sub>H<sub>21</sub>N<sub>2</sub>O<sup>+</sup> [M+H]<sup>+</sup> 209.1648; Found: 209.1651.

**General procedure C:** To a round bottom flask was added *Monomer-C* (1 mmol), Boc<sub>2</sub>O (872.0 mg, 4 mmol, 4 equiv), and <sup>t</sup>BuOH (20 mL). The reaction mixture was stirred at 50 °C for 8 h. The reaction was cooled to room temperature. Solvents were removed under vacuum and the residue was resolved with DCM, washed with saturated NaHCO<sub>3</sub> aqueous solution and brine, and dried over anhydrous Na<sub>2</sub>SO<sub>4</sub>. Solvent evaporation gave the crude product *Monomer-D*, which was used directly for the next step without further purification.

**General procedure D:** To a stirred suspension of NaH (160.0 mg, 4 mmol, 60% dispersion in mineral oil, 4 equiv) in dry DMF (10 mL) was added the above obtained crude product *Monomer-D* (approximately 1 mmol) at 0 °C. After being stirred at 0 °C for 0.5 h, MeI (570.0 mg, 4 mmol, 4 equiv) was added dropwisely. The mixture was then stirred at room temperature until the starting material was consumed completely (monitored by TLC). The reaction was quenched with H<sub>2</sub>O at 0 °C and the mixture was extracted with DCM. The combined organic layers were washed with H<sub>2</sub>O and brine, dried over anhydrous Na<sub>2</sub>SO<sub>4</sub>, filtered, and concentrated in vacuo to obtained crude product *Monomer-E*, which was used for next step without further purification.

**General procedure E:** To a round bottom flask was added the above obtained crude

*Monomer-E* (approximately 1 mmol), DCM (50 mL), and TFA (10 mL). The mixture was stirred at room temperature for 5 h. Solvents were removed under vacuum and the residue was resolved with DCM (50 mL), washed with saturated Na<sub>2</sub>CO<sub>3</sub> aqueous solution and brine, and dried over anhydrous Na<sub>2</sub>SO<sub>4</sub>. After solvent evaporation, the residue was subjected to column chromatography on silica gel (PE/EtOAc = 20:1) to give the desired product *Monomer-F*.

**5-(*tert*-butyl)-*N*<sup>1</sup>,*N*<sup>3</sup>-dimethyl-2-((3-methylbenzyl)oxy)benzene-1,3-diamine**

(*Monomer-F1*)

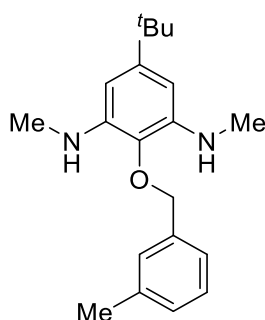

Chemical Formula: C<sub>20</sub>H<sub>28</sub>N<sub>2</sub>O; Molecular Weight: 312.4570

209.3 mg, 67% yield (calculated over 3 steps), red solid. M.P. = 70-71 °C

<sup>1</sup>H NMR (400 MHz, CDCl<sub>3</sub>) δ 7.29-7.25 (m, 3H), 7.16-7.13 (m, 1H), 6.17 (s, 2H), 4.77 (s, 2H), 3.97 (br s, 2H), 2.81 (s, 6H), 2.37 (s, 3H), 1.33 (s, 9H). <sup>13</sup>C NMR (100 MHz, CDCl<sub>3</sub>) δ 148.4, 141.8, 138.3, 137.9, 130.9, 128.8, 128.6, 124.9, 98.4, 72.6, 34.9, 31.7, 30.9, 21.5. IR (KBr) ν 3418, 2955, 1598, 1415, 1178, 997, 818, 768. HRMS (ESI) *m/z* Calcd. for C<sub>20</sub>H<sub>29</sub>N<sub>2</sub>O<sup>+</sup> [M+H]<sup>+</sup>; 313.2274; Found: 313.2275.

**5-(*tert*-butyl)-2-((4-fluorobenzyl)oxy)-*N*<sup>1</sup>,*N*<sup>3</sup>-dimethylbenzene-1,3-diamine**

(*Monomer-F2*)

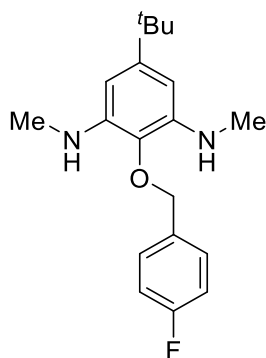

Chemical Formula: C<sub>19</sub>H<sub>25</sub>FN<sub>2</sub>O; Molecular Weight: 316.4204

183.0 mg, 58% yield (calculated over 3 steps), red oil.

**<sup>1</sup>H NMR** (400 MHz, CDCl<sub>3</sub>) δ 7.44-7.40 (m, 2H), 7.11-7.07 (m, 2H), 6.17 (s, 2H), 4.78 (s, 2H), 3.96 (s, 2H), 2.82 (s, 6H), 1.33 (s, 9H). **<sup>13</sup>C NMR** (100 MHz, CDCl<sub>3</sub>) δ 162.7 (d, *J* = 245 Hz), 148.6, 141.8, 133.9 (d, *J* = 3 Hz), 130.8, 129.8 (d, *J* = 8 Hz), 115.5 (d, *J* = 21 Hz), 98.5, 71.9, 35.0, 31.7, 30.9. **IR** (KBr) ν 3417, 2960, 1588, 1414, 1180, 992, 810, 768. **HRMS** (ESI) *m/z* Calcd. for C<sub>19</sub>H<sub>26</sub>FN<sub>2</sub>O<sup>+</sup> [M+H]<sup>+</sup> 317.2024; Found: 317.2025.

**5-(tert-butyl)-2-methoxy-N<sup>1</sup>,N<sup>3</sup>-dimethylbenzene-1,3-diamine (Monomer-F3)**

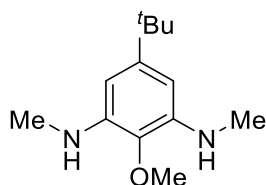

Chemical Formula: C<sub>13</sub>H<sub>22</sub>N<sub>2</sub>O; Molecular Weight: 222.3320

146.4 mg, 66% yield (calculated over 3 steps), red oil.

**<sup>1</sup>H NMR** (400 MHz, CDCl<sub>3</sub>) δ 6.23 (s, 2H), 4.11 (s, 2H), 3.75 (s, 3H), 2.93 (s, 6H), 1.40 (s, 9H). **<sup>13</sup>C NMR** (100 MHz, CDCl<sub>3</sub>) δ 148.2, 141.5, 131.5, 98.2, 58.3, 34.9, 31.6, 30.8. **IR** (KBr) ν 3417, 2955, 1598, 1415, 1178, 997, 808, 771. **HRMS** (ESI) *m/z* Calcd. for C<sub>13</sub>H<sub>23</sub>N<sub>2</sub>O<sup>+</sup> [M+H]<sup>+</sup> 223.1805; Found: 223.1805.

**5-(tert-butyl)-2-ethoxy-N<sup>1</sup>,N<sup>3</sup>-dimethylbenzene-1,3-diamine (Monomer-F4)**

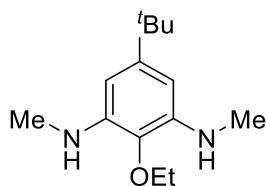

Chemical Formula: C<sub>14</sub>H<sub>24</sub>N<sub>2</sub>O; Molecular Weight: 236.3590

144.2 mg, 61% yield (calculated over 3 steps), red oil.

**<sup>1</sup>H NMR** (400 MHz, CDCl<sub>3</sub>) δ 6.18 (s, 2H), 4.08 (br s, 2H), 3.87 (q, *J* = 6.8 Hz, 2H), 2.87 (s, 6H), 1.39 (t, *J* = 6.8 Hz, 3H), 1.33 (s, 9H). **<sup>13</sup>C NMR** (100 MHz, CDCl<sub>3</sub>) δ 148.2, 141.8, 131.0, 98.6, 66.6, 34.9, 31.7, 31.0, 16.2. **IR** (KBr) ν 3418, 2955, 1598, 1537, 1178, 997, 818, 768. **HRMS** (APCI) *m/z* Calcd. for C<sub>14</sub>H<sub>25</sub>N<sub>2</sub>O<sup>+</sup> [M+H]<sup>+</sup> 237.1961; Found: 237.1964.

**2-methoxy-N<sup>1</sup>,N<sup>3</sup>,5-trimethylbenzene-1,3-diamine (Monomer-F5)**

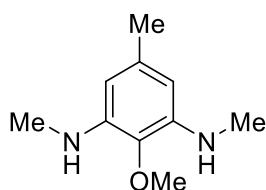

Chemical Formula: C<sub>10</sub>H<sub>16</sub>N<sub>2</sub>O; Molecular Weight: 180.2510

128.0 mg, 71% yield (calculated over 3 steps), red oil.

**<sup>1</sup>H NMR** (400 MHz, CDCl<sub>3</sub>) δ 5.98 (s, 2H), 4.04 (br s, 2H), 3.70 (s, 3H), 2.86 (s, 6H), 2.31 (s, 3H). **<sup>13</sup>C NMR** (100 MHz, CDCl<sub>3</sub>) δ 142.0, 135.0, 131.5, 101.6, 58.5, 30.8, 22.1. **IR** (KBr) ν 3418, 2924, 2854, 1736, 1674, 1595, 1479, 1356, 1180, 995, 799. **HRMS** (ESI) *m/z* Calcd. for C<sub>10</sub>H<sub>17</sub>N<sub>2</sub>O<sup>+</sup> [M+H]<sup>+</sup> 181.1335; Found: 181.1334.

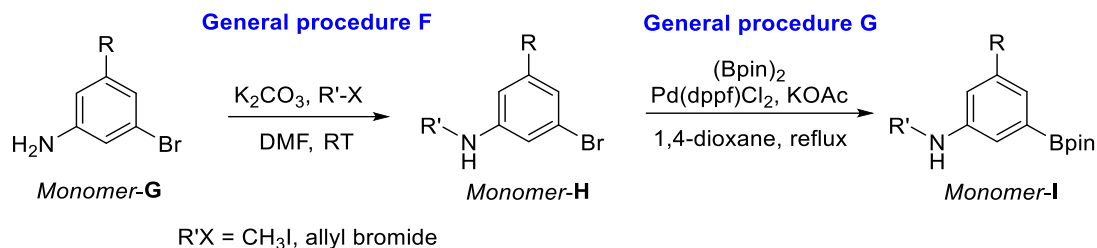

**General procedure F:** To a mixture of *Monomer-G* (10 mmol) and K<sub>2</sub>CO<sub>3</sub> (1.5 g, 11 mmol, 1.1 equiv) in DMF (50 mL) was slowly added R'X (10 mmol, 1.0 equiv), and the mixture was stirred at room temperature overnight. The reaction mixture was quenched with H<sub>2</sub>O, extracted with EtOAc, washed with brine, and dried over anhydrous Na<sub>2</sub>SO<sub>4</sub>. The product *Monomer-H* was isolated by column chromatography on silica gel (PE/EtOAc = 30:1).

### 3-bromo-*N*,5-dimethylaniline (*Monomer-H1*)

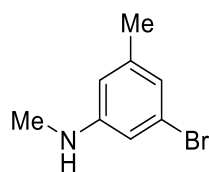

Chemical Formula: C<sub>8</sub>H<sub>10</sub>BrN; Molecular Weight: 200.0790

660.0 mg, 33% yield, brown oil.

<sup>1</sup>H NMR (400 MHz, CDCl<sub>3</sub>) δ 6.71 (s, 1H), 6.58 (s, 1H), 6.34 (s, 1H), 3.69 (br s, 1H), 2.81 (s, 3H), 2.28 (s, 3H). <sup>13</sup>C NMR (100 MHz, CDCl<sub>3</sub>) δ 150.4, 123.0, 120.7, 112.0, 112.0, 30.5, 21.4. IR (KBr) ν 2966, 870, 1577, 1540, 1456, 1382, 1143, 973, 808, 704. HRMS (ESI) *m/z* Calcd. for C<sub>8</sub>H<sub>11</sub>NBr<sup>+</sup> [M+H]<sup>+</sup> 200.0069; Found: 200.0074.

### 3-bromo-5-methoxy-*N*-methylaniline (*Monomer-H2*)

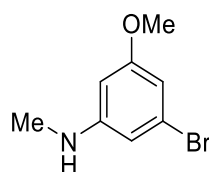

Chemical Formula: C<sub>8</sub>H<sub>10</sub>BrNO; Molecular Weight: 216.0780



821.0 mg, 38% yield, brown oil.

**<sup>1</sup>H NMR** (400 MHz, CDCl<sub>3</sub>) δ 6.42 (s, 1H), 6.37 (s, 1H), 6.05 (s, 1H), 3.75 (s, 4H), 2.79 (s, 3H). **<sup>13</sup>C NMR** (100 MHz, CDCl<sub>3</sub>) δ 161.4, 151.4, 123.5, 108.6, 106.0, 97.4, 55.4, 30.7. **IR** (KBr) ν 3507, 2994, 1770, 1375, 1275, 1246, 913, 764, 748. **HRMS** (ESI) *m/z* Calcd. for C<sub>8</sub>H<sub>11</sub>NBrO<sup>+</sup> [M+H]<sup>+</sup> 216.0019; Found: 216.0017.

**General procedure G:** Under argon atmosphere, to a 50 mL round bottom flask was added *Monomer-H* (3 mmol), (Bpin)<sub>2</sub> (915.0 mg, 3.6 mmol, 1.2 equiv), Pd(dppf)Cl<sub>2</sub> (112.0 mg, 0.15 mmol, 5 mol%), KOAc (882.0 mg, 9 mmol, 3 equiv), and dry 1,4-dioxane (30 mL). The mixture was stirred at 100 °C for 12 h. The reaction was quenched with H<sub>2</sub>O, extracted with EtOAc, washed with brine, and dried over anhydrous Na<sub>2</sub>SO<sub>4</sub>. After filtration and removal of the solvent under vacuum, the residue was subjected to column chromatography on silica gel (PE/EtOAc = 10:1) to afford *Monomer-I*.

***N*-methyl-3-(4,4,5,5-tetramethyl-1,3,2-dioxaborolan-2-yl)aniline (*Monomer-I1*)**

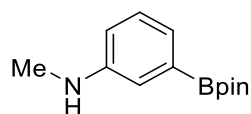

Chemical Formula: C<sub>13</sub>H<sub>20</sub>BNO<sub>2</sub>; Molecular Weight: 233.1180

559.0 mg, 80% yield, red oil.

**<sup>1</sup>H NMR** (400 MHz, CDCl<sub>3</sub>) δ 7.25 (t, *J* = 7.2 Hz, 1H), 7.21 (dt, *J* = 6.8 Hz, 1.2 Hz, 1H), 7.10 (d, *J* = 2.4 Hz, 1H), 6.74 (ddd, *J* = 7.6 Hz, 2.8 Hz, 1.6 Hz, 1H), 3.66 (br s, 1H), 2.86 (s, 3H), 1.37 (s, 12H). **<sup>13</sup>C NMR** (100 MHz, CDCl<sub>3</sub>) δ 148.8, 128.7, 123.7, 118.5, 115.4, 83.7, 30.8, 24.9. **IR** (KBr) ν 3410, 2978, 2814, 1604, 1582, 1358, 1144, 1097, 851, 706. **HRMS** (ESI) *m/z* Calcd. for C<sub>13</sub>H<sub>21</sub>NBO<sub>2</sub><sup>+</sup> [M+H]<sup>+</sup> 234.1660; Found: 234.1658.

***N*,3-dimethyl-5-(4,4,5,5-tetramethyl-1,3,2-dioxaborolan-2-yl)aniline (*Monomer-I2*)**

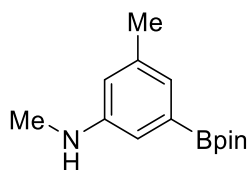

Chemical Formula: C<sub>14</sub>H<sub>22</sub>BNO<sub>2</sub>; Molecular Weight: 247.1450

615.0 mg, 83% yield, red oil.

<sup>1</sup>H NMR (400 MHz, CDCl<sub>3</sub>) δ 7.00 (s, 1H), 6.87 (d, *J* = 2.0 Hz, 1H), 6.54 (s, 1H), 2.84 (s, 3H), 2.29 (s, 3H), 1.34 (s, 12H). <sup>13</sup>C NMR (100 MHz, CDCl<sub>3</sub>) δ 149.0, 138.5, 124.8, 116.3, 116.0, 83.7, 83.6, 31.1, 25.2, 25.0, 21.5. IR (KBr) ν 3063, 2966, 1577, 1540, 1474, 1356, 1143, 973, 808, 704. HRMS (ESI) *m/z* Calcd. for C<sub>14</sub>H<sub>23</sub>NBO<sub>2</sub><sup>+</sup> [M+H]<sup>+</sup> 248.1816; Found: 248.1819.

### 3-methoxy-*N*-methyl-5-(4,4,5,5-tetramethyl-1,3,2-dioxaborolan-2-yl)aniline

(Monomer-I3)

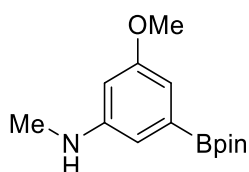

Chemical Formula: C<sub>14</sub>H<sub>22</sub>BNO<sub>3</sub>; Molecular Weight: 263.1440

631.0 mg, 80% yield, red oil.

<sup>1</sup>H NMR (400 MHz, CDCl<sub>3</sub>) δ 6.71-6.70 (m, 2H), 6.27 (t, *J* = 2.0 Hz, 1H), 3.81 (s, 4H), 2.83 (s, 3H), 1.34 (s, 12H). <sup>13</sup>C NMR (100 MHz, CDCl<sub>3</sub>) δ 160.6, 150.5, 112.6, 107.2, 102.0, 83.8, 55.4, 30.9, 25.0. IR (KBr) ν 2994, 1770, 1759, 1375, 1246, 1057, 913, 764, 748. HRMS (ESI) *m/z* Calcd. for C<sub>14</sub>H<sub>23</sub>NBO<sub>3</sub><sup>+</sup> [M+H]<sup>+</sup> 264.1766; Found: 264.1768.

### *N*-allyl-3-(4,4,5,5-tetramethyl-1,3,2-dioxaborolan-2-yl)aniline (Monomer-I4)

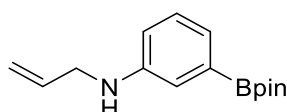

Chemical Formula: C<sub>15</sub>H<sub>22</sub>BNO<sub>2</sub>; Molecular Weight: 259.1560

638.0 mg, 83% yield, red oil.

**<sup>1</sup>H NMR** (400 MHz, CDCl<sub>3</sub>)  $\delta$  7.23-7.17 (m, 2H), 7.09 (d,  $J$  = 2.0 Hz, 1H), 6.74 (dt,  $J$  = 7.6 Hz, 2.4 Hz, 1H), 6.01-5.92 (m, 1H), 5.31-5.26 (m, 1H), 5.18-5.15 (m, 1H), 3.81-3.80 (m, 3H), 1.35 (s, 12H). **<sup>13</sup>C NMR** (100 MHz, CDCl<sub>3</sub>)  $\delta$  147.6, 135.6, 128.8, 124.1, 119.5, 116.3, 115.8, 83.8, 46.7, 25.0. **IR** (KBr)  $\nu$  3404, 2978, 2929, 1603, 1360, 1581, 1145, 964, 852, 788, 706. **HRMS** (ESI)  $m/z$  Calcd. for C<sub>15</sub>H<sub>23</sub>NBO<sub>2</sub><sup>+</sup> [M+H]<sup>+</sup> 260.1816; Found: 260.1819.

### 3. Synthesis of *Dimer*

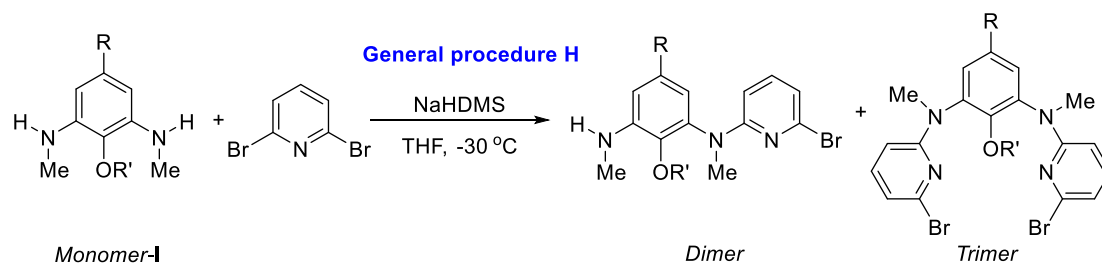

**General procedure H:** Under argon atmosphere, to a mixture of *Monomer-I* (10 mmol, 2.5 equiv) and 2,6-dibromopyridine (950.0 mg, 4 mmol) in dry THF (40 mL) was slowly added NaHMDS (2 mL, 4 mmol, 2.0 M in THF, 1.0 equiv) at -30 °C. The reaction mixture was stirred at -30 °C for 12 h. The reaction was quenched with H<sub>2</sub>O, extracted with EtOAc, washed with brine, and dried over anhydrous Na<sub>2</sub>SO<sub>4</sub>. After filtration and removal of the solvent under vacuum, the residue was subjected to column chromatography on silica gel (PE/DCM = 5:1) to give a mixture of *Dimer* and *Trimer*, which was used directly in the next step without purification.

| Compound              | Ratio of <i>Dimer</i> : <i>Trimer</i> | Calculated yield of Dimer |
|-----------------------|---------------------------------------|---------------------------|
| <p><i>Dimer-1</i></p> | >10:1                                 | 46%                       |
| <p><i>Dimer-2</i></p> | >10:1                                 | 51%                       |
| <p><i>Dimer-3</i></p> | 10:1                                  | 41%                       |
| <p><i>Dimer-4</i></p> | 8:1                                   | 40%                       |
| <p><i>Dimer-5</i></p> | 10:1                                  | 46%                       |
| <p><i>Dimer-6</i></p> | >10:1                                 | 62%                       |
| <p><i>Dimer-7</i></p> | 7:1                                   | 38%                       |
| <p><i>Dimer-8</i></p> | 8:1                                   | 35%                       |
| <p><i>Dimer-9</i></p> | 5:1                                   | 40%                       |

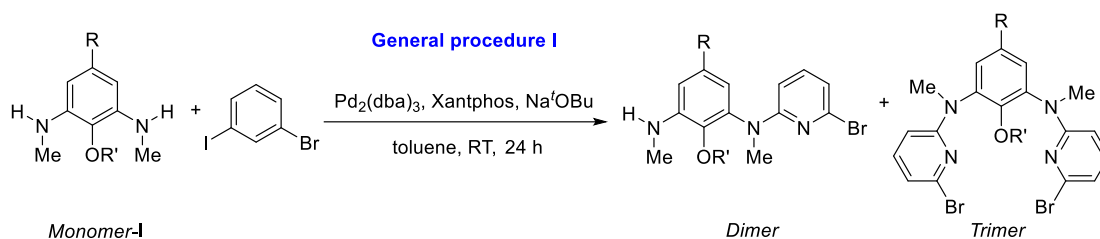

**General procedure I:** Under argon atmosphere, to a mixture of *Monomer-I* (10 mmol, 2.5 equiv), Pd<sub>2</sub>(dba)<sub>3</sub> (366.3 mg, 0.4 mmol, 10 mol%), Xantphos (462.4 mg, 0.8 mmol, 20 mol%) and Cs<sub>2</sub>CO<sub>3</sub> (2.6 g, 8 mmol, 2.0 equiv) in dry toluene (40 mL) was slowly added 1-bromo-3-iodobenzene (1.1 g, 4 mmol) at room temperature and the mixture was stirred for 24 h. The reaction mixture was quenched with H<sub>2</sub>O, extracted with EtOAc, washed with brine, and dried over anhydrous Na<sub>2</sub>SO<sub>4</sub>. After filtration and removal of the solvent under vacuum, the residue was subjected to column chromatography on silica gel (PE/DCM = 5:1) to give a mixture of *Dimer* and *Trimer*, which was used directly in the next step without purification.

| Compound               | Ratio of <i>Dimer</i> : <i>Trimer</i> | Calculated yield of <i>Dimer</i> |
|------------------------|---------------------------------------|----------------------------------|
| <p><i>Dimer-10</i></p> | 5:1                                   | 36%                              |
| <p><i>Dimer-11</i></p> | 5:1                                   | 40%                              |

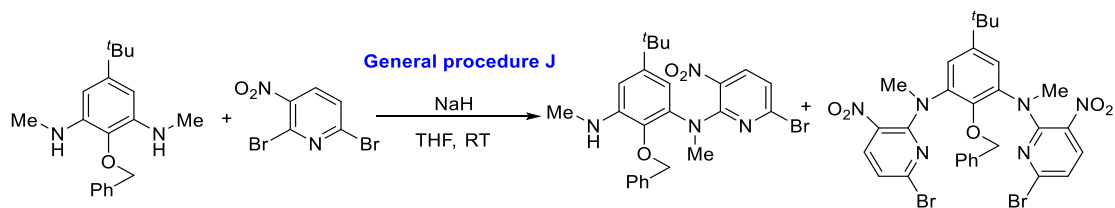

**General procedure J:** Under argon atmosphere, to a mixture of *Monomer* (1.8 g, 6 mmol, 1.5 equiv) and NaH (160.0 mg, 4 mmol, 60% dispersion in mineral oil, 1.0 equiv) in dry THF (40 mL) was slowly added 2,6-dibromo-3-nitropyridine (1.2 g, 4 mmol) in THF (5 mL). The reaction mixture was stirred at room temperature for 12 h. The reaction was quenched with H<sub>2</sub>O, extracted with EtOAc, washed with brine, and dried over anhydrous Na<sub>2</sub>SO<sub>4</sub>. After filtration and removal of the solvent under vacuum, the residue was isolated by column chromatography on silica gel (PE/EtOAc = 10:1) to give a mixture of *Dimer* and *Trimer* (40% yield of *Dimer*, ratio of *Dimer* : *Trimer* > 10 : 1), which was used directly in the next step without purification.

#### 4. Synthesis of tetramer 6a-6aa and 6ad

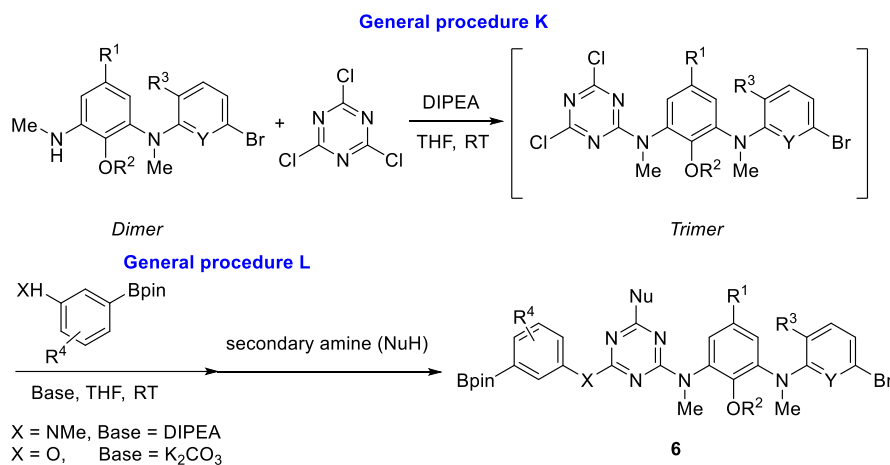

**General procedure K:** To a 50 mL round bottom flask was added cyanuric chloride (40.5 mg, 0.22 mmol, 1.1 equiv), DIPEA (52.0 mg, 0.4 mmol, 2 equiv), and THF (2.5 mL). A solution of *Dimer* (crude product, 0.2 mmol) in 2.5 mL THF was slowly added to the reaction at room temperature. The reaction mixture was quenched with H<sub>2</sub>O, extracted with EtOAc, washed with brine, and dried over anhydrous Na<sub>2</sub>SO<sub>4</sub>. Solvents were evaporated in vacuo to obtain crude *Trimer*, which was used for next step without further purification.

**General procedure L:** To a round bottom flask was added crude *Trimer* (approximately 0.2 mmol), base (0.3 mmol, 1.5 equiv), aryl borate (0.22 mmol, 1.1 equiv), and THF (10 mL). The reaction mixture was then stirred at 50 °C for 48 h until the starting material was consumed completely. Solvents were removed under vacuum and the residue was resolved with EtOAc, washed with brine, and dried over anhydrous Na<sub>2</sub>SO<sub>4</sub>. Solvents were evaporated in vacuo to obtain crude product tetramer intermediate, which was used for next step without further purification.

To a round bottom flask was added sequentially the above obtained linear tetramer intermediate (approximately 0.2 mmol), THF (20 mL), and secondary amine (2 mmol, 10 equiv). The mixture was stirred at room temperature until the starting material was consumed completely. Solvents were removed under vacuum and the residue was resolved with EtOAc, washed with brine, and dried over anhydrous Na<sub>2</sub>SO<sub>4</sub>. After



solvent evaporation, the residue was subjected to column chromatography on silica gel (PE/EtOAc = 20:1) to give the desired linear tetramer **6**.

***N*<sup>2</sup>-(2-(benzyloxy)-3-((6-bromopyridin-2-yl)(methyl)amino)-5-(*tert*-butyl)phenyl)-*N*<sup>2</sup>,*N*<sup>4</sup>,*N*<sup>4</sup>,*N*<sup>6</sup>-tetramethyl-*N*<sup>6</sup>-(3-(4,4,5,5-tetramethyl-1,3,2-dioxaborolan-2-yl)phenyl)-1,3,5-triazine-2,4,6-triamine (**6a**)**

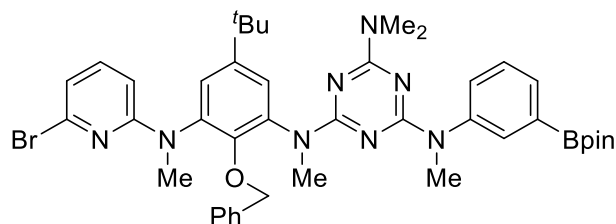

Chemical Formula: C<sub>42</sub>H<sub>52</sub>BBrN<sub>8</sub>O<sub>3</sub>; Molecular Weight: 807.6450

129.0 mg, 63% yield (calculated over 3 steps), white solid. M.P. = 72-73 °C

<sup>1</sup>H NMR (400 MHz, CDCl<sub>3</sub>, 333 K) δ 7.77 (s, 1H), 7.56 (d, *J* = 6.0 Hz, 1H), 7.41 (s, 1H), 7.21-7.17 (m, 5H), 7.09-7.04 (m, 4H), 6.68 (d, *J* = 7.2 Hz, 1H), 6.09 (d, *J* = 6.0 Hz, 1H), 4.63 (s, 2H), 3.45 (s, 3H), 3.34 (s, 6H), 3.01 (s, 6H), 1.33 (s, 12H), 1.29 (s, 9H). <sup>13</sup>C NMR (100 MHz, CDCl<sub>3</sub>, 333 K) δ 166.1, 165.7, 159.1, 149.7, 147.6, 144.9, 140.1, 139.6, 138.5, 138.4, 137.6, 131.2, 130.0, 128.3, 128.2, 127.7, 127.4, 126.6, 124.0, 115.4, 106.9, 83.9, 74.9, 38.1, 37.2, 36.9, 36.0, 34.7, 31.5, 25.1. IR (KBr) ν 2978, 2929, 1604, 1582, 1358, 1144, 964, 852, 706. HRMS (ESI) *m/z* Calcd. for C<sub>42</sub>H<sub>53</sub>N<sub>8</sub>BBrO<sub>3</sub><sup>+</sup> [M+H]<sup>+</sup> 807.3512; Found: 807.3519.

***N*<sup>2</sup>-(2-(benzyloxy)-3-((6-bromopyridin-2-yl)(methyl)amino)-5-(*tert*-butyl)phenyl)-*N*<sup>4</sup>,*N*<sup>4</sup>-diethyl-*N*<sup>2</sup>,*N*<sup>6</sup>-dimethyl-*N*<sup>6</sup>-(3-(4,4,5,5-tetramethyl-1,3,2-dioxaborolan-2-yl)phenyl)-1,3,5-triazine-2,4,6-triamine (**6b**)**

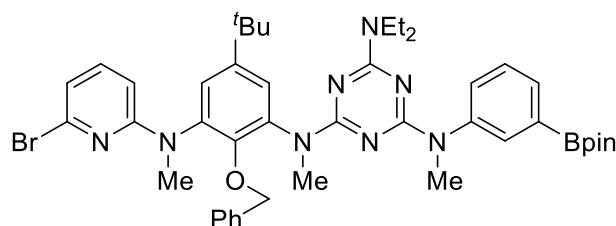

Chemical Formula: C<sub>44</sub>H<sub>56</sub>BBrN<sub>8</sub>O<sub>3</sub>; Molecular Weight: 835.6990

107.0 mg, 64% yield (calculated over 3 steps), colorless oil.

**<sup>1</sup>H NMR** (400 MHz, CDCl<sub>3</sub>, 333 K)  $\delta$  7.76 (s, 1H), 7.56 (d,  $J$  = 7.2 Hz, 1H), 7.16 (d,  $J$  = 6.4 Hz, 1H), 7.22-7.17 (m, 5H), 7.10 (d,  $J$  = 2.4 Hz, 1H), 7.07-7.03 (m, 3H), 6.69 (d,  $J$  = 7.2 Hz, 1H), 6.10 (d,  $J$  = 8.0 Hz, 1H), 4.63 (s, 2H), 3.44 (s, 6H), 3.36 (s, 3H), 3.33 (s, 3H), 1.33 (s, 12H), 1.29 (s, 9H), 1.07 (s, 6H). **<sup>13</sup>C NMR** (100 MHz, CDCl<sub>3</sub>, 333 K)  $\delta$  166.3, 164.7, 159.1, 149.8, 147.4, 144.9, 139.9, 139.7, 138.3, 137.5, 130.9, 129.9, 128.2, 128.1, 127.6, 127.2, 126.7, 124.0, 115.2, 106.7, 83.7, 74.7, 41.3, 37.9, 36.9, 36.5, 34.5, 31.4, 24.9, 13.4. **IR** (KBr)  $\nu$  2928, 2857, 1577, 1534, 1386, 1144, 973, 808, 705. **HRMS** (ESI)  $m/z$  Calcd. for C<sub>44</sub>H<sub>57</sub>BBrN<sub>8</sub>O<sub>3</sub><sup>+</sup> [M+H]<sup>+</sup> 835.3825; Found: 835.3824.

***N*<sup>2</sup>-(2-(benzyloxy)-3-((6-bromopyridin-2-yl)(methyl)amino)-5-(*tert*-butyl)phenyl)-*N*<sup>2</sup>,*N*<sup>4</sup>-dimethyl-6-(pyrrolidin-1-yl)-*N*<sup>4</sup>-(3-(4,4,5,5-tetramethyl-1,3,2-dioxaborolan-2-yl)phenyl)-1,3,5-triazine-2,4-diamine (6c)**

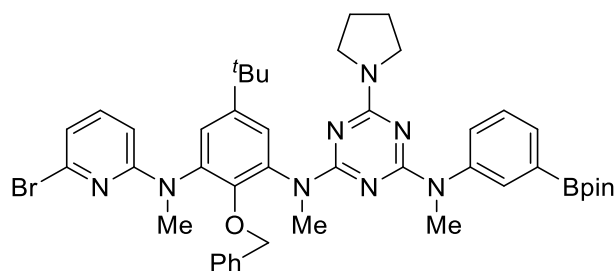

Chemical Formula: C<sub>44</sub>H<sub>54</sub>BBrN<sub>8</sub>O<sub>3</sub>; Molecular Weight: 833.6830

93.3 mg, 56% yield (calculated over 3 steps), colorless oil.

**<sup>1</sup>H NMR** (400 MHz, CDCl<sub>3</sub>, 333 K)  $\delta$  7.81 (s, 1H), 7.56 (d,  $J$  = 7.2 Hz, 1H), 7.44 (d,  $J$  = 8.0 Hz, 1H), 7.23-7.17 (m, 5H), 7.09 (d,  $J$  = 2.8 Hz, 1H), 7.08-7.04 (m, 3H), 7.69 (d,  $J$  = 3.2 Hz, 1H), 6.09 (d,  $J$  = 8.4 Hz, 1H), 4.65 (s, 2H), 3.46 (s, 7H), 3.35 (s, 3H), 3.35 (s, 3H), 1.88 (s, 4H), 1.35 (s, 12H), 1.30 (s, 9H). **<sup>13</sup>C NMR** (100 MHz, CDCl<sub>3</sub>, 333 K)  $\delta$  166.2, 165.5, 164.1, 159.1, 149.7, 147.5, 145.0, 140.0, 139.8, 138.5, 138.4, 137.6, 132.0, 130.9, 129.9, 128.3, 128.2, 127.7, 127.3, 126.7, 123.9, 115.3, 106.9, 83.9, 74.8, 45.9, 38.1, 37.0, 36.7, 34.7, 31.5, 25.5, 25.1. **IR** (KBr)  $\nu$  2966, 2870, 1541, 1456, 1382, 1143, 973, 808, 704. **HRMS** (ESI)  $m/z$  Calcd. for C<sub>44</sub>H<sub>55</sub>BBrN<sub>8</sub>O<sub>3</sub><sup>+</sup> [M+H]<sup>+</sup> 833.3668; Found: 833.3665.

***N*<sup>2</sup>-(2-(benzyloxy)-3-((6-bromopyridin-2-yl)(methyl)amino)-5-(*tert*-butyl)phenyl)-6-methoxy-*N*<sup>2</sup>,*N*<sup>4</sup>-dimethyl-*N*<sup>4</sup>-(3-(4,4,5,5-tetramethyl-1,3,2-dioxaborolan-2-yl)phenyl)-1,3,5-triazine-2,4-diamine (6d)**

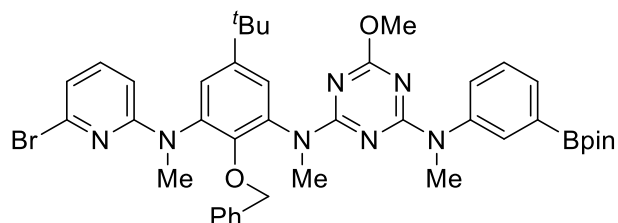

Chemical Formula: C<sub>41</sub>H<sub>49</sub>BBrN<sub>7</sub>O<sub>4</sub>; Molecular Weight: 794.6020

82.6 mg, 52% yield (calculated over 3 steps), white solid. M.P. = 71-72 °C

<sup>1</sup>H NMR (400 MHz, CDCl<sub>3</sub>, 333 K) δ 7.60 (br s, 2H), 7.19-7.13 (m, 7H), 7.09 (dd, *J* = 8.0 Hz, 7.2 Hz, 1H), 7.01-7.00 (m, 2H), 6.71 (d, *J* = 7.2 Hz, 1H), 6.15 (br s, 1H), 4.59 (br s, 2H), 3.84-3.68 (m, 3H), 3.51-3.18 (m, 9H), 1.33 (s, 12H), 1.29 (s, 9H). <sup>13</sup>C NMR (100 MHz, CDCl<sub>3</sub>, 333 K) δ 171.2, 167.3, 158.8, 149.6, 148.0, 144.2, 140.1, 139.0, 138.64, 138.59, 137.4, 132.0, 130.1, 128.3, 128.0, 127.8, 125.7, 124.6, 115.7, 107.0, 84.0, 75.0, 53.8, 38.1, 37.7, 37.4, 34.7, 25.1. IR (KBr) ν 2923, 2853, 1584, 1538, 1374, 1349, 1267, 1133, 975, 809, 774. HRMS (ESI) *m/z* Calcd. for C<sub>41</sub>H<sub>50</sub>BBrN<sub>7</sub>O<sub>4</sub><sup>+</sup> [M+H]<sup>+</sup> 794.3195; Found: 794.3179.

***N*<sup>2</sup>-(2-(benzyloxy)-3-((6-bromopyridin-2-yl)(methyl)amino)-5-(*tert*-butyl)phenyl)-*N*<sup>2</sup>,*N*<sup>4</sup>,*N*<sup>4</sup>,*N*<sup>6</sup>-tetramethyl-*N*<sup>6</sup>-(3-methyl-5-(4,4,5,5-tetramethyl-1,3,2-dioxaborolan-2-yl)phenyl)-1,3,5-triazine-2,4,6-triamine (6e)**

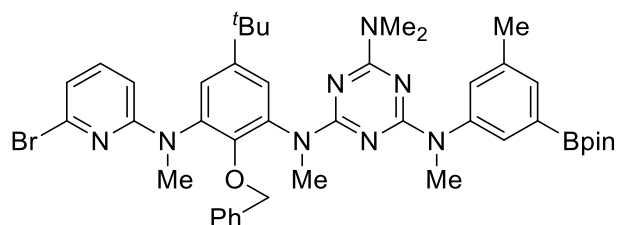

Chemical Formula: C<sub>43</sub>H<sub>54</sub>BBrN<sub>8</sub>O<sub>3</sub>; Molecular Weight: 821.6720

95.3 mg, 58% yield (calculated over 3 steps), colorless oil.

**<sup>1</sup>H NMR** (400 MHz, CDCl<sub>3</sub>, 333 K)  $\delta$  7.60 (s, 1H), 7.39 (s, 1H), 7.26-7.24 (m, 1H), 7.22-7.21 (m, 1H), 7.17-7.16 (m, 3H), 7.08-7.01 (m, 4H), 6.67 (d,  $J$  = 8.0 Hz, 1H), 6.11 (d,  $J$  = 8.4 Hz, 1H), 4.64 (s, 2H), 3.41 (s, 3H), 3.31 (s, 3H), 3.29 (s, 3H), 2.95 (s, 6H), 2.29 (s, 3H), 1.31 (s, 12H), 1.26 (s, 9H). **<sup>13</sup>C NMR** (100 MHz, CDCl<sub>3</sub>, 333 K)  $\delta$  166.4, 166.0, 165.8, 159.1, 149.6, 147.5, 145.0, 140.1, 139.7, 138.5, 138.4, 137.7, 137.1, 131.8, 130.5, 129.6, 128.3, 128.2, 127.8, 126.8, 123.8, 115.4, 106.9, 83.9, 74.8, 38.1, 37.2, 36.8, 35.9, 34.7, 31.5, 29.9, 25.1, 21.3 **IR** (KBr)  $\nu$  2966, 2870, 1736, 1577, 1540, 1474, 1382, 1143, 973, 808, 704. **HRMS** (ESI)  $m/z$  Calcd. for C<sub>43</sub>H<sub>55</sub>N<sub>8</sub>BBrO<sub>3</sub><sup>+</sup> [M+H]<sup>+</sup> 821.3668; Found: 821.3670.

***N*<sup>2</sup>-(2-(benzyloxy)-3-((6-bromopyridin-2-yl)(methyl)amino)-5-(*tert*-butyl)phenyl)-*N*<sup>4</sup>-(3-methoxy-5-(4,4,5,5-tetramethyl-1,3,2-dioxaborolan-2-yl)phenyl)-*N*<sup>2</sup>,*N*<sup>4</sup>,*N*<sup>6</sup>,*N*<sup>6</sup>-tetramethyl-1,3,5-triazine-2,4,6-triamine (6f)**

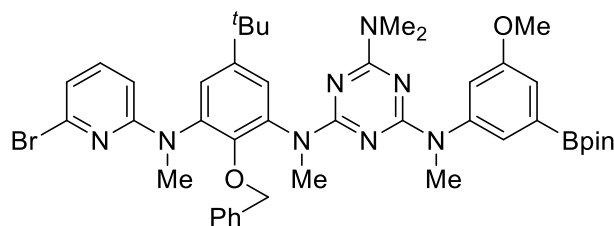

Chemical Formula: C<sub>43</sub>H<sub>54</sub>BBrN<sub>8</sub>O<sub>4</sub>; Molecular Weight: 837.6710

103.8 mg, 62% yield (calculated over 3 steps), colorless oil.

**<sup>1</sup>H NMR** (400 MHz, CDCl<sub>3</sub>, 333 K)  $\delta$  7.43 (s, 1H), 7.22 (d,  $J$  = 2.4 Hz, 1H), 7.19-7.17 (m, 3H), 7.12 (s, 1H), 7.09 (d,  $J$  = 2.4 Hz, 1H), 7.08-7.04 (m, 4H), 6.69 (d,  $J$  = 7.2 Hz, 1H), 6.14 (d,  $J$  = 8.4 Hz, 1H), 4.66 (s, 2H), 3.80 (s, 3H), 3.43 (s, 3H), 3.35 (s, 3H), 3.34 (s, 3H), 2.99 (s, 6H), 1.33 (s, 12H), 1.28 (s, 9H). **<sup>13</sup>C NMR** (100 MHz, CDCl<sub>3</sub>, 333 K)  $\delta$  166.1, 165.6, 159.1, 158.9, 149.2, 147.4, 146.0, 139.9, 139.4, 138.6, 138.2, 137.3, 129.8, 128.4, 128.2, 127.8, 126.7, 124.9, 123.7, 116.4, 115.3, 106.8, 83.9, 74.7, 55.5, 38.1, 37.2, 36.8, 35.2, 34.7, 31.4, 25.0. **IR** (KBr)  $\nu$  2965, 2929, 1731, 1579, 1550, 1382, 1517, 1268, 1143, 973, 809. **HRMS** (ESI)  $m/z$  Calcd. for C<sub>43</sub>H<sub>55</sub>N<sub>8</sub>BBrO<sub>4</sub><sup>+</sup> [M+H]<sup>+</sup> 837.3617; Found: 837.3621.

***N*<sup>2</sup>-(3-((6-bromopyridin-2-yl)(methyl)amino)-5-(*tert*-butyl)-2-((3-methylbenzyl)oxy)phenyl)-*N*<sup>2</sup>,*N*<sup>4</sup>,*N*<sup>4</sup>,*N*<sup>6</sup>-tetramethyl-*N*<sup>6</sup>-(3-(4,4,5,5-tetramethyl-1,3,2-dioxaborolan-2-yl)phenyl)-1,3,5-triazine-2,4,6-triamine (6g)**

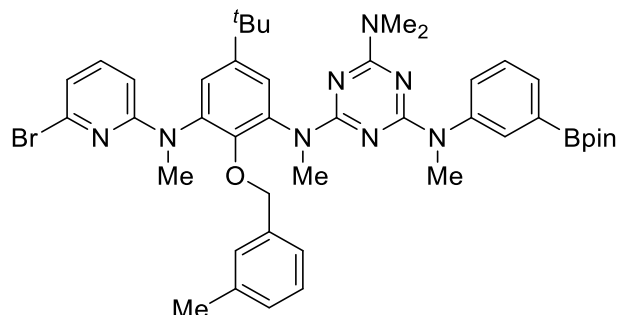

Chemical Formula: C<sub>43</sub>H<sub>54</sub>BBrN<sub>8</sub>O<sub>3</sub>; Molecular Weight: 821.6720

118.2 mg, 72% yield (calculated over 3 steps), colorless oil.

<sup>1</sup>H NMR (400 MHz, CDCl<sub>3</sub>, 333 K) δ 7.77 (s, 1H), 7.56 (d, *J* = 7.6 Hz, 1H), 7.44-7.40 (m, 1H), 7.21 (s, 2H), 7.09-7.03 (m, 3H), 6.98 (d, *J* = 7.2 Hz, 1H), 6.84 (s, 2H), 6.69 (d, *J* = 7.2 Hz, 1H), 6.09 (d, *J* = 8.0 Hz, 1H), 4.59 (s, 2H), 3.45 (s, 3H), 3.35-3.34 (m, 6H), 3.00 (s, 6H), 2.25 (s, 3H), 1.33 (s, 12H), 1.29 (s, 9H). <sup>13</sup>C NMR (100 MHz, CDCl<sub>3</sub>, 333 K) δ 166.4, 166.0, 165.7, 159.1, 149.8, 147.5, 145.0, 140.1, 139.7, 138.5, 138.4, 137.9, 137.6, 132.0, 131.0, 130.0, 129.1, 128.5, 128.1, 127.4, 126.7, 125.3, 123.9, 115.3, 106.9, 83.9, 74.9, 38.1, 37.1, 36.8, 35.9, 34.7, 31.5, 25.1, 21.4. IR (KBr) ν 2925, 1532, 1490, 1385, 1356, 1143, 973, 808, 705. HRMS (ESI) *m/z* Calcd. for C<sub>43</sub>H<sub>55</sub>N<sub>8</sub>BBrO<sub>3</sub><sup>+</sup> [M+H]<sup>+</sup> 821.3668; Found: 821.3674.

***N*<sup>2</sup>-(3-((6-bromopyridin-2-yl)(methyl)amino)-5-(*tert*-butyl)-2-((4-fluorobenzyl)oxy)phenyl)-*N*<sup>2</sup>,*N*<sup>4</sup>,*N*<sup>4</sup>,*N*<sup>6</sup>-tetramethyl-*N*<sup>6</sup>-(3-(4,4,5,5-tetramethyl-1,3,2-dioxaborolan-2-yl)phenyl)-1,3,5-triazine-2,4,6-triamine (6h)**

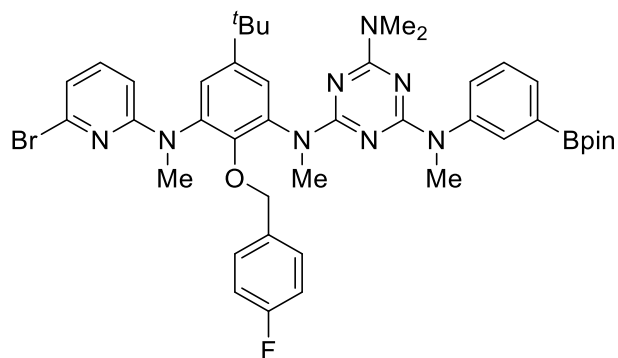

Chemical Formula:  $C_{42}H_{51}BFBrN_8O_3$ ; Molecular Weight: 825.6354

75.9 mg, 46% yield (calculated over 3 steps), colorless oil.

$^1H$  NMR (400 MHz,  $CDCl_3$ , 333 K)  $\delta$  7.76 (s, 1H), 7.56 (d,  $J = 7.2$  Hz, 1H), 7.41 (d,  $J = 6.0$  Hz, 1H), 7.23-7.18 (m, 2H), 7.08 (d,  $J = 2.4$  Hz, 1H), 7.04 (t,  $J = 8.0$  Hz, 1H), 6.99-6.96 (m, 2H), 6.82-6.80 (m, 2H), 6.69 (d,  $J = 7.6$  Hz, 1H), 6.03 (d,  $J = 7.6$  Hz, 1H), 4.58 (s, 2H), 3.45 (s, 3H), 3.32 (s, 6H), 3.01 (s, 6H), 1.33 (s, 12H), 1.29 (s, 9H).  $^{13}C$  NMR (100 MHz,  $CDCl_3$ , 333 K)  $\delta$  166.3, 166.0, 165.7, 162.6 (d,  $J = 244$  Hz), 159.0, 149.4, 147.7, 144.9, 140.0, 139.7, 138.5, 138.4, 133.4 (d,  $J = 3$  Hz), 132.1, 131.1, 130.2 (d,  $J = 8$  Hz), 130.0, 127.4, 126.7, 123.9, 115.4, 115.0 (d,  $J = 21$  Hz), 106.8, 84.0, 74.0, 38.1, 37.1, 36.7, 35.9, 34.7, 31.5, 25.0. IR (KBr)  $\nu$  2921, 2850, 1532, 1470, 1385, 1143, 973, 808, 705. HRMS (ESI)  $m/z$  Calcd. for  $C_{42}H_{52}N_8FBBrO_3^+$   $[M+H]^+$  825.3417; Found: 825.3422.

*N*<sup>2</sup>-(3-((6-bromopyridin-2-yl)(methyl)amino)-5-(*tert*-butyl)-2-methoxyphenyl)-*N*<sup>2</sup>,*N*<sup>4</sup>,*N*<sup>4</sup>,*N*<sup>6</sup>-tetramethyl-*N*<sup>6</sup>-(3-(4,4,5,5-tetramethyl-1,3,2-dioxaborolan-2-yl)phenyl)-1,3,5-triazine-2,4,6-triamine (**6i**)

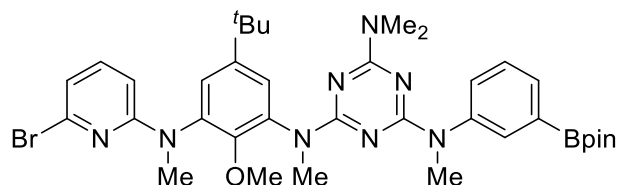

Chemical Formula:  $C_{36}H_{48}BBBrN_8O_3$ ; Molecular Weight: 731.5470

102.4 mg, 70% yield (calculated over 3 steps), colorless oil.

**<sup>1</sup>H NMR** (400 MHz, CDCl<sub>3</sub>, 333 K)  $\delta$  7.76 (s, 1H), 7.54 (d, *J* = 7.2 Hz, 1H), 7.41 (d, *J* = 6.4 Hz, 1H), 7.24-7.20 (m, 1H), 7.17 (d, *J* = 2.0 Hz, 1H), 7.08-7.06 (m, 2H), 6.70 (d, *J* = 7.6 Hz, 1H), 6.09 (d, *J* = 8.0 Hz, 1H), 3.49 (s, 3H), 3.43 (s, 3H), 3.40 (s, 3H), 3.35 (s, 3H), 2.99-2.96 (m, 6H), 1.33 (s, 12H), 1.28 (s, 9H). **<sup>13</sup>C NMR** (100 MHz, CDCl<sub>3</sub>, 333 K)  $\delta$  166.4, 166.1, 165.8, 159.2, 151.1, 147.4, 145.0, 140.2, 139.2, 138.6, 137.8, 132.1, 131.1, 129.9, 127.4, 126.6, 124.1, 115.4, 106.7, 83.9, 60.5, 38.0, 37.1, 36.7, 35.9, 34.7, 31.5, 25.1. **IR** (KBr)  $\nu$  2928, 1534, 1386, 1356, 1246, 1144, 973, 808, 705. **HRMS** (ESI) *m/z* Calcd. for C<sub>36</sub>H<sub>49</sub>N<sub>8</sub>BBrO<sub>3</sub><sup>+</sup> [M+H]<sup>+</sup> 731.3199; Found: 731.3185.

***N*<sup>2</sup>-(3-((6-bromopyridin-2-yl)(methyl)amino)-5-(*tert*-butyl)-2-ethoxyphenyl)-*N*<sup>2</sup>,*N*<sup>4</sup>,*N*<sup>4</sup>,*N*<sup>6</sup>-tetramethyl-*N*<sup>6</sup>-(3-(4,4,5,5-tetramethyl-1,3,2-dioxaborolan-2-yl)phenyl)-1,3,5-triazine-2,4,6-triamine (6j)**

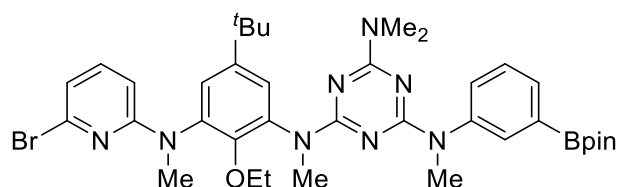

Chemical Formula: C<sub>37</sub>H<sub>50</sub>BBrN<sub>8</sub>O<sub>3</sub>; Molecular Weight: 745.5740

83.4 mg, 56% yield (calculated over 3 steps), colorless oil.

**<sup>1</sup>H NMR** (400 MHz, CDCl<sub>3</sub>, 333 K)  $\delta$  7.74 (s, 1H), 7.53 (s, 1H), 7.39 (s, 1H), 7.20-7.16 (m, 2H), 7.06 (s, 2H), 6.70-6.69 (m, 1H), 6.10 (s, 1H), 3.66 (s, 2H), 3.40-3.35 (m, 9H), 2.96 (s, 6H), 1.33 (s, 12H), 1.27 (s, 9H), 1.01-1.00 (m, 3H). **<sup>13</sup>C NMR** (100 MHz, CDCl<sub>3</sub>, 333 K)  $\delta$  166.4, 166.0, 165.8, 159.2, 150.2, 147.1, 145.0, 140.1, 139.5, 138.5, 138.1, 132.1, 131.1, 130.0, 127.4, 126.7, 123.9, 115.2, 106.8, 83.9, 68.8, 38.1, 37.1, 36.7, 35.9, 34.7, 31.5, 25.1, 15.9. **IR** (KBr)  $\nu$  2925, 1573, 1532, 1385, 1356, 1144, 973, 808, 765. **HRMS** (ESI) *m/z* Calcd. for C<sub>37</sub>H<sub>51</sub>N<sub>8</sub>BBrO<sub>3</sub><sup>+</sup> [M+H]<sup>+</sup> 745.3355; Found: 745.3353.

***N*<sup>2</sup>-(3-((6-bromopyridin-2-yl)(methyl)amino)-5-(*tert*-butyl)-2-methoxyphenyl)-*N*<sup>2</sup>,*N*<sup>4</sup>,*N*<sup>4</sup>,*N*<sup>6</sup>-tetramethyl-*N*<sup>6</sup>-(3-methyl-5-(4,4,5,5-tetramethyl-1,3,2-dioxaborolan-2-yl)phenyl)-1,3,5-triazine-2,4,6-triamine (6k)**

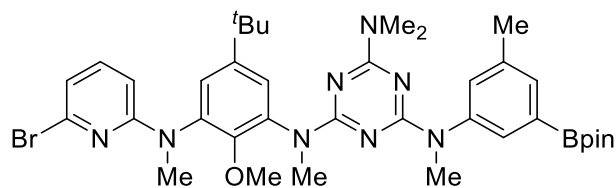

Chemical Formula: C<sub>37</sub>H<sub>50</sub>BBrN<sub>8</sub>O<sub>3</sub>; Molecular Weight: 745.5740

71.5 mg, 48% yield (calculated over 3 steps), colorless oil.

<sup>1</sup>H NMR (400 MHz, CDCl<sub>3</sub>, 333 K) δ 7.61 (s, 1H), 7.39 (s, 1H), 7.27 (s, 1H), 7.20 (d, *J* = 2.0 Hz, 1H), 7.10-7.06 (m, 2H), 6.70 (d, *J* = 7.2 Hz, 1H), 6.14 (d, *J* = 8.4 Hz, 1H), 3.51 (s, 3H), 3.42 (s, 6H), 3.36 (s, 3H), 3.04-2.96 (m, 6H), 2.31 (s, 3H), 1.33 (s, 9H), 1.28 (s, 12H). <sup>13</sup>C NMR (100 MHz, CDCl<sub>3</sub>, 333 K) δ 166.4, 166.0, 165.9, 159.2, 151.0, 147.3, 145.0, 140.2, 139.2, 138.5, 137.7, 137.1, 131.8, 130.5, 129.6, 126.6, 124.0, 115.4, 106.7, 83.9, 60.5, 38.1, 37.2, 36.8, 35.8, 34.7, 31.5, 25.1, 21.3. IR (KBr) ν 2926, 2855, 1532, 1479, 1382, 1248, 1144, 973, 808, 722. HRMS (ESI) *m/z* Calcd. for C<sub>37</sub>H<sub>51</sub>N<sub>8</sub>BBrO<sub>3</sub><sup>+</sup> [M+H]<sup>+</sup> 745.3355; Found: 745.3363.

***N*<sup>2</sup>-3-((6-bromopyridin-2-yl)(methyl)amino)-5-(*tert*-butyl)-2-methoxyphenyl)-*N*<sup>4</sup>-(3-methoxy-5-(4,4,5,5-tetramethyl-1,3,2-dioxaborolan-2-yl)phenyl)-*N*<sup>2</sup>,*N*<sup>4</sup>,*N*<sup>6</sup>,*N*<sup>6</sup>-tetramethyl-1,3,5-triazine-2,4,6-triamine (6l)**

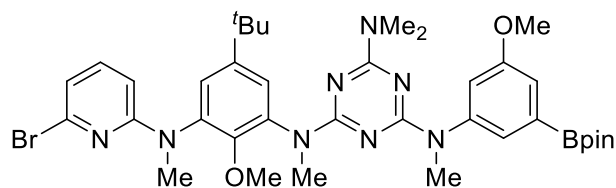

Chemical Formula: C<sub>37</sub>H<sub>50</sub>BBrN<sub>8</sub>O<sub>4</sub>; Molecular Weight: 761.5730

82.0 mg, 54% yield (calculated over 3 steps), colorless oil.

<sup>1</sup>H NMR (400 MHz, CDCl<sub>3</sub>, 333 K) δ 7.42 (s, 1H), 7.18 (d, *J* = 2.4 Hz, 1H), 7.11 (s, 1H), 7.08-7.07 (m, 2H), 7.04 (s, 1H), 6.71 (d, *J* = 7.6 Hz, 1H), 6.14 (d, *J* = 8.4 Hz, 1H), 3.78 (s, 3H), 3.51 (s, 3H), 3.42 (s, 6H), 3.36 (s, 3H), 2.97 (s, 6H), 1.33 (s, 12H), 1.27 (s, 9H). <sup>13</sup>C NMR (100 MHz, CDCl<sub>3</sub>, 333 K) δ 166.4, 166.0, 165.8, 159.3, 159.2, 151.0, 147.3, 146.3, 140.2, 139.2, 138.6, 137.7, 126.6, 125.1, 124.0, 116.6, 115.7, 115.4, 106.7,



84.0, 60.5, 55.6, 38.0, 37.2, 36.8, 35.9, 34.7, 31.5, 27.2, 25.1. **IR** (KBr)  $\nu$  2928, 2926, 2855, 1735, 1579, 1403, 1386, 1144, 973, 809, 704. **HRMS** (ESI)  $m/z$  Calcd. for  $C_{37}H_{51}N_8BBrO_4^+ [M+H]^+$  761.3304; Found: 761.3313.

***N*<sup>2</sup>-(2-(benzyloxy)-3-((6-bromo-3-nitropyridin-2-yl)(methyl)amino)-5-(*tert*-butyl)phenyl)-*N*<sup>2</sup>,*N*<sup>4</sup>,*N*<sup>4</sup>,*N*<sup>6</sup>-tetramethyl-*N*<sup>6</sup>-(3-(4,4,5,5-tetramethyl-1,3,2-dioxaborolan-2-yl)phenyl)-1,3,5-triazine-2,4,6-triamine (6m)**

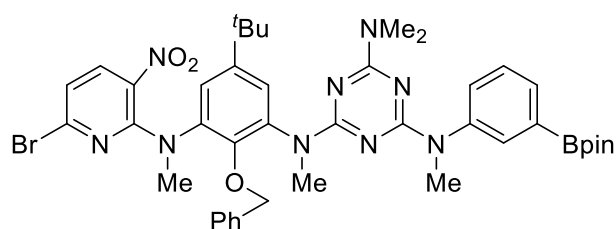

Chemical Formula:  $C_{42}H_{51}BBN_9O_5$ ; Molecular Weight: 852.6420

112.5 mg, 66% yield (calculated over 3 steps), yellow solid. M.P. = 75-77 °C

**<sup>1</sup>H NMR** (400 MHz,  $CDCl_3$ , 333 K)  $\delta$  7.81 (s, 1H), 7.65 (d,  $J$  = 8.4 Hz, 1H), 7.56 (d,  $J$  = 6.8 Hz, 1H), 7.44-7.55 (m, 1H), 7.25-7.22 (m, 4H), 7.11 (d,  $J$  = 2.4 Hz, 1H), 7.09-7.08 (m, 2H), 6.94 (d,  $J$  = 2.4 Hz, 1H), 6.80 (d,  $J$  = 8.0 Hz, 1H), 4.70 (s, 2H), 3.45-3.41 (m, 6H), 3.25 (s, 3H), 2.98 (s, 6H), 1.34 (s, 12H), 1.26 (s, 9H). **<sup>13</sup>C NMR** (100 MHz,  $CDCl_3$ , 333 K)  $\delta$  166.3, 166.0, 165.8, 151.1, 147.4, 146.8, 145.0, 142.2, 139.3, 138.3, 137.6, 136.2, 134.4, 132.3, 131.1, 129.9, 128.5, 128.3, 127.8, 127.5, 126.9, 120.4, 116.7, 83.9, 74.7, 41.0, 37.1, 36.0, 35.9, 34.7, 31.3, 25.1. **IR** (KBr)  $\nu$  2978, 2931, 1732, 1587, 1519, 1394, 1348, 1142, 975, 808, 775. **HRMS** (ESI)  $m/z$  Calcd. for  $C_{42}H_{52}N_9BBrO_5^+ [M+H]^+$  852.3362; Found: 852.3370.

***N*<sup>2</sup>-(3-((3-amino-6-bromopyridin-2-yl)(methyl)amino)-2-(benzyloxy)-5-(*tert*-butyl)phenyl)-*N*<sup>2</sup>,*N*<sup>4</sup>,*N*<sup>4</sup>,*N*<sup>6</sup>-tetramethyl-*N*<sup>6</sup>-(3-(4,4,5,5-tetramethyl-1,3,2-dioxaborolan-2-yl)phenyl)-1,3,5-triazine-2,4,6-triamine (6n)**

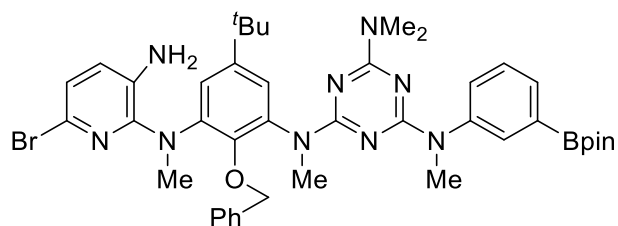

Chemical Formula:  $C_{42}H_{53}BBrN_9O_3$ ; Molecular Weight: 822.6600

Prepared from **6m** under **General procedure B**.

72% yield (calculated yield based on **6m**), colorless oil.

$^1H$  NMR (400 MHz,  $CDCl_3$ , 333 K)  $\delta$  7.76 (s, 1H), 7.55 (d,  $J = 6.8$  Hz, 1H), 7.40 (d,  $J = 7.2$  Hz, 1H), 7.24-7.21 (m, 3H), 7.21-7.18 (m, 3H), 7.06 (s, 1H), 6.85 (s, 1H), 6.83 (d,  $J = 8.4$  Hz, 1H), 6.60 (d,  $J = 8.0$  Hz, 1H), 4.79 (s, 2H), 3.40 (s, 6H), 3.31 (s, 3H), 2.99 (s, 8H), 1.33 (s, 12H), 1.22 (s, 9H).  $^{13}C$  NMR (100 MHz,  $CDCl_3$ , 333 K)  $\delta$  166.1, 165.7, 159.1, 149.7, 147.6, 144.9, 140.1, 139.6, 138.5, 138.4, 137.6, 132.0, 131.2, 130.0, 128.3, 128.2, 127.7, 127.4, 126.6, 124.0, 115.4, 106.9, 83.9, 74.9, 38.1, 37.2, 36.9, 36.0, 34.7, 31.5, 25.1. IR (KBr)  $\nu$  3457, 3365, 2963, 2928, 2866, 1546, 1531, 1451, 1385, 1317, 1269, 1143, 964, 808, 705. HRMS (ESI)  $m/z$  Calcd. for  $C_{42}H_{54}N_9BBrO_3^+ [M+H]^+$  822.3621; Found: 822.3618.

***N*<sup>2</sup>-allyl-*N*<sup>4</sup>-(2-(benzyloxy)-3-((6-bromopyridin-2-yl)(methyl)amino)-5-(*tert*-butyl)phenyl)-*N*<sup>6</sup>,*N*<sup>6</sup>,*N*<sup>6</sup>-trimethyl-*N*<sup>2</sup>-(3-(4,4,5,5-tetramethyl-1,3,2-dioxaborolan-2-yl)phenyl)-1,3,5-triazine-2,4,6-triamine (6o)**

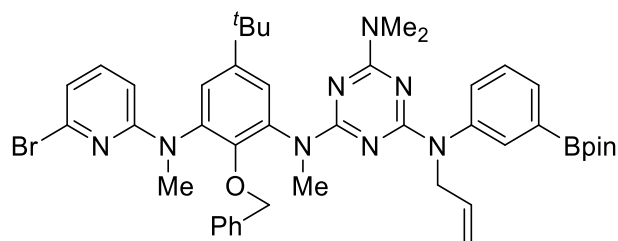

Chemical Formula:  $C_{44}H_{54}BBrN_8O_3$ ; Molecular Weight: 833.6830

76.6 mg, 46% yield (calculated over 3 steps), colorless oil.

$^1H$  NMR (400 MHz,  $CDCl_3$ , 333 K)  $\delta$  7.78 (br s, 1H), 7.58 (d,  $J = 6.8$  Hz, 1H), 7.35 (s,

1H), 7.20-7.18 (m, 5H), 7.09 (d,  $J = 2.0$  Hz, 1H), 7.07-7.03 (m, 3H), 6.69 (d,  $J = 7.6$  Hz, 1H), 6.11 (d,  $J = 8.8$  Hz, 1H), 6.00-5.85 (br s, 1H), 5.02-5.01 (m, 2H), 4.63-4.51 (m, 4H), 3.35-3.32 (m, 6H), 3.06-2.97 (m, 6H), 1.32 (s, 9H), 1.29 (s, 12H).  $^{13}\text{C}$  NMR (100 MHz,  $\text{CDCl}_3$ , 333 K)  $\delta$  166.4, 166.1, 165.5, 159.1, 149.9, 147.6, 143.9, 140.1, 139.7, 138.5, 137.6, 135.5, 133.5, 131.5, 130.7, 128.32, 128.25, 127.8, 127.5, 126.8, 124.1, 116.1, 115.4, 106.9, 83.9, 74.9, 52.5, 38.1, 36.8, 35.9, 34.7, 31.6, 25.1. **IR** (KBr)  $\nu$  2960, 2926, 2855, 1735, 1579, 1548, 1403, 1359, 1144, 973, 809, 704. **HRMS** (ESI)  $m/z$  Calcd. for  $\text{C}_{44}\text{H}_{55}\text{N}_8\text{BBrO}_3^+ [\text{M}+\text{H}]^+$  833.3668; Found: 833.3664.

***N*<sup>2</sup>-(3-((6-bromopyridin-2-yl)(methyl)amino)-2-methoxy-5-methylphenyl)-*N*<sup>2</sup>,*N*<sup>4</sup>,*N*<sup>4</sup>,*N*<sup>6</sup>-tetramethyl-*N*<sup>6</sup>-(3-(4,4,5,5-tetramethyl-1,3,2-dioxaborolan-2-yl)phenyl)-1,3,5-triazine-2,4,6-triamine (6p)**

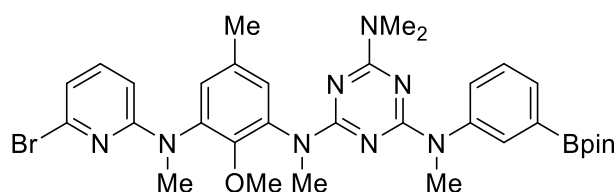

Chemical Formula:  $\text{C}_{33}\text{H}_{42}\text{BBrN}_8\text{O}_3$ ; Molecular Weight: 689.4660

95.1 mg, 69% yield (calculated over 3 steps), white solid. M.P. = 72-73 °C

$^1\text{H}$  NMR (400 MHz,  $\text{CDCl}_3$ , 333 K)  $\delta$  7.75 (s, 1H), 7.54 (d,  $J = 7.2$  Hz, 1H), 7.41 (d,  $J = 6.8$  Hz, 1H), 7.22 (s, 1H), 7.07 (t,  $J = 8.0$  Hz, 1H), 6.97 (s, 1H), 6.87 (s, 1H), 6.70 (d,  $J = 7.6$  Hz, 1H), 6.10 (d,  $J = 7.2$  Hz, 1H), 3.47-3.44 (m, 6H), 3.38 (s, 3H), 3.34 (s, 3H), 2.99 (s, 6H), 2.29 (s, 3H), 1.34 (s, 12H).  $^{13}\text{C}$  NMR (100 MHz,  $\text{CDCl}_3$ , 333 K)  $\delta$  166.3, 166.1, 165.7, 159.0, 151.4, 145.0, 140.1, 139.7, 138.6, 138.1, 133.7, 132.1, 131.0, 130.0, 129.7, 127.7, 127.3, 115.5, 106.8, 83.9, 60.6, 37.9, 37.0, 36.8, 35.9, 25.1, 20.5. **IR** (KBr)  $\nu$  2970, 2931, 1579, 1490, 1356, 1144, 976, 910, 868, 809, 705. **HRMS** (ESI)  $m/z$  Calcd. for  $\text{C}_{33}\text{H}_{43}\text{N}_8\text{BBrO}_3^+ [\text{M}+\text{H}]^+$  689.2729; Found: 689.2726.

***N*<sup>2</sup>-(3-((6-bromopyridin-2-yl)(methyl)amino)-2-methylphenyl)-*N*<sup>2</sup>,*N*<sup>4</sup>,*N*<sup>4</sup>,*N*<sup>6</sup>-tetramethyl-*N*<sup>6</sup>-(3-(4,4,5,5-tetramethyl-1,3,2-dioxaborolan-2-yl)phenyl)-1,3,5-triazine-2,4,6-triamine (6q)**

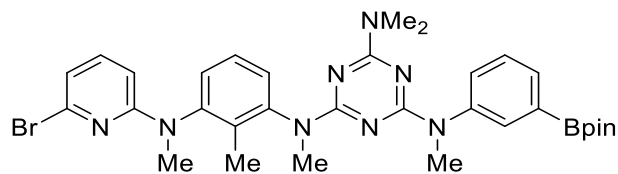

Chemical Formula: C<sub>32</sub>H<sub>40</sub>BBrN<sub>8</sub>O<sub>2</sub>; Molecular Weight: 659.4400

67.3 mg, 51% yield (calculated over 3 steps), yellow oil.

<sup>1</sup>H NMR (400 MHz, DMSO-*d*<sub>6</sub>, 373 K) δ 7.70 (s, 1H), 7.41 (s, 2H), 7.34 (t, *J* = 8.0 Hz, 1H), 7.22-7.20 (m, 2H), 7.15-7.00 (m, 2H), 6.91-6.85 (m, 1H), 6.74 (d, *J* = 7.2 Hz, 1H), 3.32-3.27 (m, 6H), 3.06 (s, 3H), 2.90 (br s, 6H), 1.83 (s, 3H), 1.30 (s, 12H). <sup>13</sup>C NMR (100 MHz, DMSO-*d*<sub>6</sub>, 373 K) δ 164.9, 164.6, 157.9, 149.0, 145.5, 143.9, 143.6, 139.0, 134.4, 131.5, 129.9, 128.3, 127.8, 127.4, 127.1, 126.6, 125.9, 121.5, 117.5, 114.4, 114.1, 105.3, 83.2, 82.9, 36.8, 36.1, 36.0, 34.9, 30.4, 29.6, 29.4, 28.4, 24.2, 11.9. IR (KBr) ν 2926, 2851, 1580, 1487, 1380, 1316, 1144, 970, 810, 705. HRMS (ESI) *m/z* Calcd. for C<sub>32</sub>H<sub>41</sub>N<sub>8</sub>BBrO<sub>2</sub><sup>+</sup> [M+H]<sup>+</sup> 659.2623; Found: 659.2638.

***N*<sup>2</sup>-(3-((6-bromopyridin-2-yl)(methyl)amino)-2-methoxy-5-methylphenyl)-*N*<sup>2</sup>,*N*<sup>4</sup>,*N*<sup>4</sup>,*N*<sup>6</sup>-tetramethyl-*N*<sup>6</sup>-(3-(4,4,5,5-tetramethyl-1,3,2-dioxaborolan-2-yl)phenyl)-1,3,5-triazine-2,4,6-triamine (6r)**

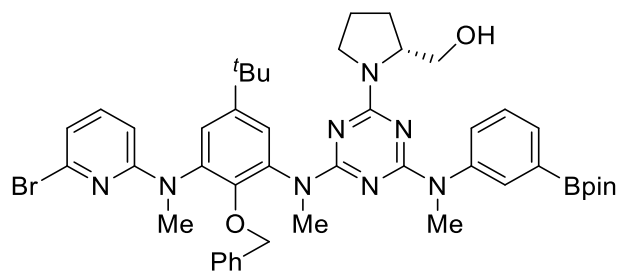

Chemical Formula: C<sub>45</sub>H<sub>56</sub>BBrN<sub>8</sub>O<sub>4</sub>; Molecular Weight: 863.7090

84.6 mg, 49% yield, white solid (calculated over 3 steps). M.P. = 76-77 °C

<sup>1</sup>H NMR (400 MHz, tetrachloroethane-*d*<sub>2</sub>, 373 K) δ 7.82 (s, 1H), 7.63-7.62 (d, *J* = 7.2 Hz, 1H), 7.41-7.24 (m, 3H), 7.23-7.20 (m, 3H), 7.18 (d, *J* = 1.6 Hz, 1H), 7.15-7.09 (m, 3H), 6.74 (d, *J* = 7.6 Hz, 1H), 6.28 (br s, 1H), 4.69 (s, 2H), 3.74-3.53 (m, 2H), 3.47 (s, 3H), 3.41 (s, 3H), 3.36 (s, 3H), 2.11-2.02 (m, 1H), 1.91-1.77 (m, 2H), 1.68-1.60 (m,

1H), 1.38 (s, 12H), 1.36 (s, 9H). <sup>13</sup>C NMR (100 MHz, tetrachloroethane-*d*<sub>2</sub>, 373 K) δ 165.3, 164.7, 164.5, 158.8, 149.5, 147.6, 144.2, 139.6, 138.6, 138.2, 138.1, 137.4, 132.1, 131.1, 129.2, 127.9, 127.7, 127.3, 127.2, 125.9, 124.3, 115.1, 106.8, 83.6, 74.5, 67.9, 59.8, 47.3, 37.7, 37.0, 36.8, 34.3, 31.1, 29.2, 24.7, 23.5. IR (KBr) ν 2963, 1579, 1532, 1490, 1385, 1316, 1266, 1143, 973, 808, 704. HRMS (ESI) *m/z* Calcd. for C<sub>45</sub>H<sub>57</sub>N<sub>8</sub>BBrO<sub>4</sub><sup>+</sup> [M+H]<sup>+</sup> 863.3774; Found: 863.3773.

***N*<sup>2</sup>-(2-(benzyloxy)-3-((3-bromophenyl)(methyl)amino)-5-(*tert*-butyl)phenyl)-*N*<sup>2</sup>,*N*<sup>4</sup>,*N*<sup>4</sup>,*N*<sup>6</sup>-tetramethyl-*N*<sup>6</sup>-(3-(4,4,5,5-tetramethyl-1,3,2-dioxaborolan-2-yl)phenyl)-1,3,5-triazine-2,4,6-triamine (6s)**

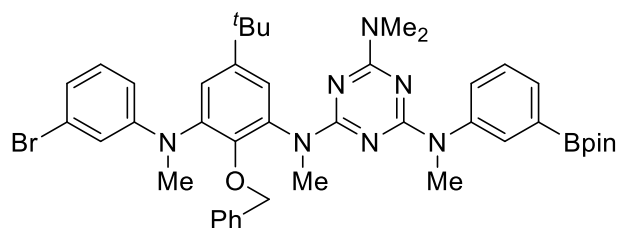

Chemical Formula: C<sub>43</sub>H<sub>53</sub>BBrN<sub>7</sub>O<sub>3</sub>; Molecular Weight: 806.6570

55.6 mg, 40% yield (calculated over 3 steps), colorless oil.

<sup>1</sup>H NMR (400 MHz, CDCl<sub>3</sub>, 333 K) δ 7.80 (s, 1H), 7.57 (d, *J* = 7.2 Hz, 1H), 7.44-7.42 (m, 1H), 7.18-7.17 (m, 4H), 7.08 (d, *J* = 2.4 Hz, 1H), 7.06-7.03 (m, 2H), 6.99 (t, *J* = 8.0 Hz, 1H), 6.84-6.82 (m, 1H), 6.79-6.78 (m, 1H), 6.51 (d, *J* = 8.0 Hz, 1H), 4.63 (s, 2H), 3.45 (s, 3H), 3.35 (s, 3H), 3.14 (s, 3H), 2.98 (s, 6H), 1.34 (s, 12H), 1.28 (s, 9H). <sup>13</sup>C NMR (100 MHz, CDCl<sub>3</sub>, 333 K) δ 166.4, 166.0, 165.8, 150.9, 149.8, 147.3, 145.0, 140.3, 139.8, 137.9, 131.1, 130.1, 128.4, 128.2, 127.7, 127.5, 126.0, 124.1, 123.3, 120.0, 116.2, 112.2, 83.9, 74.8, 39.4, 37.1, 36.8, 35.9, 34.7, 31.5, 25.1. IR (KBr) ν 2963, 1579, 1532, 1490, 1385, 1356, 1316, 1143, 973, 808, 704. HRMS (ESI) *m/z* Calcd. for C<sub>43</sub>H<sub>54</sub>N<sub>7</sub>BBrO<sub>3</sub><sup>+</sup> [M+H]<sup>+</sup> 806.3559; Found: 806.3558.

***N*<sup>2</sup>-(3-((3-bromophenyl)(methyl)amino)-2-methoxy-5-methylphenyl)-*N*<sup>2</sup>,*N*<sup>4</sup>,*N*<sup>4</sup>,*N*<sup>6</sup>-tetramethyl-*N*<sup>6</sup>-(3-(4,4,5,5-tetramethyl-1,3,2-dioxaborolan-2-yl)phenyl)-1,3,5-triazine-2,4,6-triamine (6t)**

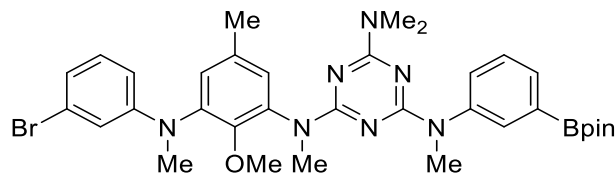

Chemical Formula: C<sub>34</sub>H<sub>43</sub>BBrN<sub>7</sub>O<sub>3</sub>; Molecular Weight: 688.4780

63.3 mg, 46% yield (calculated over 3 steps), colorless oil.

<sup>1</sup>H NMR (400 MHz, CDCl<sub>3</sub>, 333 K) δ 7.79 (s, 1H), 7.55 (d, *J* = 7.2 Hz, 1H), 7.43 (d, *J* = 7.6 Hz, 1H), 7.25-7.20 (m, 1H), 6.99 (t, *J* = 8.4 Hz, 1H), 6.92 (s, 1H), 6.86 (s, 1H), 6.84-6.82 (m, 2H), 6.54 (d, *J* = 9.2 Hz, 1H), 3.47-3.44 (m, 6H), 3.34 (s, 3H), 3.20 (s, 3H), 2.98-2.96 (m, 6H), 2.27 (s, 3H), 1.34 (s, 12H). <sup>13</sup>C NMR (100 MHz, CDCl<sub>3</sub>, 333 K) δ 166.4, 166.0, 165.8, 151.4, 150.9, 145.0, 140.2, 139.8, 133.6, 131.0, 130.2, 129.9, 128.9, 127.8, 127.4, 123.3, 120.2, 116.3, 112.4, 83.9, 60.5, 39.3, 37.1, 36.8, 35.9, 25.1, 20.8. IR (KBr) ν 2963, 1579, 1532, 1404, 1385, 1143, 973, 808, 704. HRMS (ESI) *m/z* Calcd. for C<sub>34</sub>H<sub>44</sub>N<sub>7</sub>BBrO<sub>3</sub><sup>+</sup> [M+H]<sup>+</sup> 688.2777; Found: 688.2783.

**N<sup>2</sup>-(2-(benzyloxy)-3-((6-bromopyridin-2-yl)(methyl)amino)-5-(tert-butyl)phenyl)-N<sup>2</sup>,N<sup>4</sup>,N<sup>4</sup>-trimethyl-6-(3-(4,4,5,5-tetramethyl-1,3,2-dioxaborolan-2-yl)phenoxy)-1,3,5-triazine-2,4-diamine (6u)**

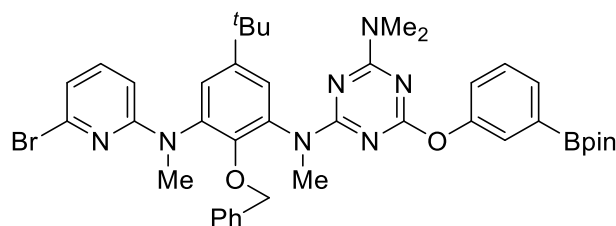

Chemical Formula: C<sub>41</sub>H<sub>49</sub>BBrN<sub>7</sub>O<sub>4</sub>; Molecular Weight: 794.6020

95.3 mg, 60% yield (calculated over 3 steps), colorless oil.

<sup>1</sup>H NMR (400 MHz, tetrachloroethane-*d*<sub>2</sub>, 373 K) δ 7.63-7.62 (m, 2H), 7.42-7.28 (m, 2H), 7.26-7.23 (m, 4H), 7.16-7.13 (m, 2H), 7.08-7.06 (m, 2H), 6.75 (d, *J* = 7.2 Hz, 1H), 6.18 (d, *J* = 6.8 Hz, 1H), 4.65 (s, 2H), 3.40 (s, 3H), 3.37 (s, 3H), 3.04 (s, 6H), 1.36 (s, 12H), 1.32 (s, 9H). <sup>13</sup>C NMR (100 MHz, tetrachloroethane-*d*<sub>2</sub>, 373 K) δ 170.5, 167.0,



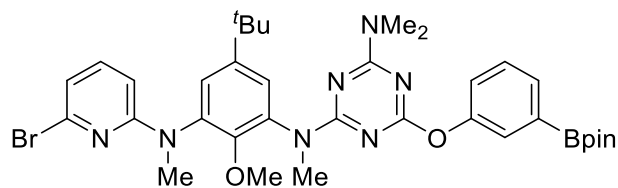

Chemical Formula: C<sub>35</sub>H<sub>45</sub>BBrN<sub>7</sub>O<sub>4</sub>; Molecular Weight: 718.5040

93.3 mg, 65% yield (calculated over 3 steps), colorless oil.

**<sup>1</sup>H NMR** (400 MHz, CDCl<sub>3</sub>, 333 K)  $\delta$  7.57 (s, 1H), 7.37-7.35 (m, 2H), 7.25-7.24 (m, 1H), 7.22 (d,  $J$  = 7.6 Hz, 1H), 6.92 (ddd,  $J$  = 8.0 Hz, 2.8 Hz, 1.2 Hz, 1H), 6.72-6.71 (m, 1H), 3.49 (s, 3H), 3.39 (s, 3H), 3.36 (s, 3H), 3.02 (s, 6H), 2.28 (s, 3H), 1.36-1.34 (m, 21H). **<sup>13</sup>C NMR** (100 MHz, CDCl<sub>3</sub>, 333 K)  $\delta$  167.4, 166.9, 158.9, 155.5, 152.6, 150.7, 147.7, 140.1, 138.7, 138.3, 137.9, 131.0, 129.2, 128.1, 127.1, 125.6, 125.2, 124.7, 121.4, 118.5, 115.6, 106.9, 84.0, 60.6, 37.9, 37.4, 36.2, 31.5, 25.0. **IR** (KBr)  $\nu$  2977, 2929, 1731, 1586, 1488, 1336, 1189, 976, 809, 733. **HRMS** (ESI)  $m/z$  Calcd. for C<sub>35</sub>H<sub>46</sub>N<sub>7</sub>BBrO<sub>4</sub><sup>+</sup> [M+H]<sup>+</sup> 718.2882; Found: 718.2888.

**N<sup>2</sup>-(3-((6-bromopyridin-2-yl)(methyl)amino)-2-methoxy-5-methylphenyl)-N<sup>2</sup>,N<sup>4</sup>,N<sup>4</sup>-trimethyl-6-(3-(4,4,5,5-tetramethyl-1,3,2-dioxaborolan-2-yl)phenoxy)-1,3,5-triazine-2,4-diamine (6x)**

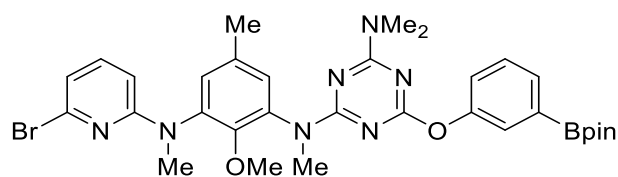

Chemical Formula: C<sub>32</sub>H<sub>39</sub>BBrN<sub>7</sub>O<sub>4</sub>; Molecular Weight: 676.4230

78.4 mg, 58% yield (calculated over 3 steps), colorless oil.

**<sup>1</sup>H NMR** (400 MHz, CDCl<sub>3</sub>, 333 K)  $\delta$  7.57-7.56 (m, 2H), 7.28-7.20 (m, 2H), 7.11 (t,  $J$  = 7.6 Hz, 1H), 6.93-6.89 (m, 2H), 6.72 (d,  $J$  = 7.2 Hz, 1H), 6.15 (d,  $J$  = 7.2 Hz, 1H), 3.48 (s, 3H), 3.38 (s, 3H), 3.36 (s, 3H), 3.00 (s, 6H), 2.27 (s, 6H), 1.28 (s, 12H). **<sup>13</sup>C NMR** (100 MHz, CDCl<sub>3</sub>, 333 K)  $\delta$  171.0, 167.4, 167.0, 158.8, 155.3, 152.7, 151.1, 140.1, 138.7, 138.3, 134.1, 131.1, 129.3, 129.2, 129.0, 128.4, 128.2, 127.4, 125.2, 121.3,



118.5, 115.7, 107.0, 84.0, 60.7, 37.9, 37.4, 36.2, 25.1, 20.8. **IR** (KBr)  $\nu$  2921, 2850, 1646, 1581, 1532, 1404, 1356, 1144, 973, 868, 808, 705. **HRMS** (APCI)  $m/z$  Calcd. for  $C_{32}H_{40}N_7BBrO_4^+ [M+H]^+$  676.2413; Found: 676.2426.

***N*<sup>2</sup>-(3-((6-bromopyridin-2-yl)(methyl)amino)-2-methoxy-5-methylphenyl)-6-(2-methoxy-5-(4,4,5,5-tetramethyl-1,3,2-dioxaborolan-2-yl)phenoxy)-*N*<sup>2</sup>,*N*<sup>4</sup>,*N*<sup>4</sup>-trimethyl-1,3,5-triazine-2,4-diamine (6y)**

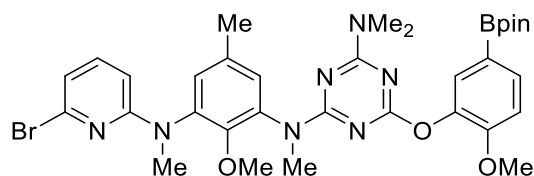

Chemical Formula:  $C_{33}H_{41}BBrN_7O_5$ ; Molecular Weight: 706.4490

93.2 mg, 66% yield (calculated over 3 steps), colorless oil.

**<sup>1</sup>H NMR** (400 MHz,  $CDCl_3$ , 333 K)  $\delta$  7.58-7.52 (m, 2H), 7.13 (t,  $J = 7.2$  Hz, 1H), 6.98-6.77 (m, 3H), 6.72 (d,  $J = 7.2$  Hz, 1H), 6.16 (d,  $J = 8.4$  Hz, 1H), 3.74 (s, 3H), 3.46 (s, 3H), 3.37 (s, 3H), 3.30 (s, 3H), 3.00 (s, 6H), 2.25 (s, 3H), 1.31 (s, 12H). **<sup>13</sup>C NMR** (100 MHz,  $CDCl_3$ , 333 K)  $\delta$  170.9, 167.4, 167.1, 158.8, 154.7, 151.1, 141.9, 140.1, 138.7, 138.3, 133.9, 133.0, 129.5, 129.1, 128.0, 115.7, 111.8, 107.0, 83.8, 60.7, 55.9, 37.9, 37.3, 36.2, 29.9, 25.1, 20.8. **IR** (KBr)  $\nu$  2925, 2854, 1574, 1519, 1347, 1250, 1061, 855, 808, 790. **HRMS** (ESI)  $m/z$  Calcd. for  $C_{34}H_{42}N_7BBrO_5^+ [M+H]^+$  706.2518; Found: 706.2530.

**Methyl 2-((4-((3-((6-bromopyridin-2-yl)(methyl)amino)-2-methoxy-5-methylphenyl)(methyl)amino)-6-(dimethylamino)-1,3,5-triazin-2-yl)oxy)-4-(4,4,5,5-tetramethyl-1,3,2-dioxaborolan-2-yl)benzoate (6z)**

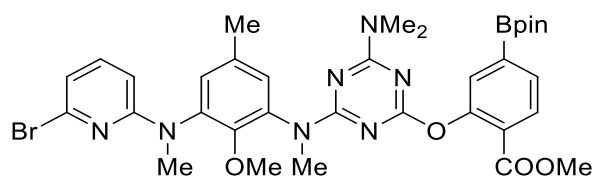

Chemical Formula:  $C_{34}H_{41}BBrN_7O_6$ ; Molecular Weight: 734.4590

76.4 mg, 52% yield (calculated over 3 steps), white solid, M.P. = 77-78 °C

**<sup>1</sup>H NMR** (400 MHz, CDCl<sub>3</sub>, 333 K)  $\delta$  7.83 (s, 1H), 7.63-7.53 (m, 2H), 7.20-7.08 (m, 1H), 6.85 (s, 2H), 6.72 (d, *J* = 7.6 Hz, 1H), 6.13 (d, *J* = 7.6 Hz, 1H), 3.70 (s, 3H), 3.44 (s, 3H), 3.36 (s, 3H), 3.32 (s, 3H), 3.01 (s, 6H), 2.24 (s, 3H), 1.33 (s, 12H). **<sup>13</sup>C NMR** (100 MHz, CDCl<sub>3</sub>, 333 K)  $\delta$  171.0, 167.2, 166.9, 166.0, 158.8, 151.7, 151.0, 140.1, 138.7, 138.3, 134.1, 131.0, 130.2, 129.9, 129.1, 128.1, 127.1, 115.7, 107.1, 84.4, 60.6, 52.0, 37.9, 37.3, 36.3, 25.1, 20.8. **IR** (KBr)  $\nu$  2978, 2931, 1732, 1587, 1519, 1403, 1348, 1142, 975, 808, 776. **HRMS** (ESI) *m/z* Calcd. for C<sub>34</sub>H<sub>42</sub>N<sub>7</sub>BBrO<sub>6</sub><sup>+</sup> [M+H]<sup>+</sup> 734.2468; Found: 734.2464.

***N*<sup>2</sup>-(3-((6-bromopyridin-2-yl)(methyl)amino)-2-methoxy-5-methylphenyl)-6-(3-chloro-5-(4,4,5,5-tetramethyl-1,3,2-dioxaborolan-2-yl)phenoxy)-*N*<sup>2</sup>,*N*<sup>4</sup>,*N*<sup>4</sup>-trimethyl-1,3,5-triazine-2,4-diamine (6aa)**

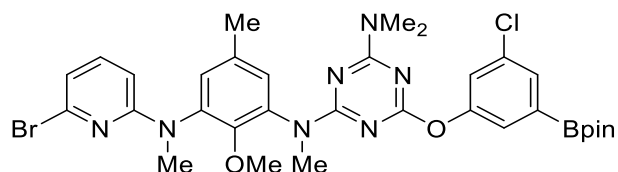

Chemical Formula: C<sub>32</sub>H<sub>38</sub>BBrClN<sub>7</sub>O<sub>4</sub>; Molecular Weight: 710.8650

86.6 mg, 61% yield (calculated over 3 steps), colorless oil.

**<sup>1</sup>H NMR** (400 MHz, CDCl<sub>3</sub>, 333 K)  $\delta$  7.54 (s, 1H), 7.35 (s, 1H), 7.12-7.08 (m, 2H), 6.94-6.91 (m, 3H), 6.72 (d, *J* = 7.2 Hz, 1H), 6.19 (d, *J* = 7.2 Hz, 1H), 3.47 (s, 3H), 3.37 (s, 6H), 3.01 (s, 6H), 2.27 (s, 3H), 1.34 (s, 12H), 1.32 (s, 9H). **<sup>13</sup>C NMR** (100 MHz, CDCl<sub>3</sub>, 333 K)  $\delta$  170.6, 167.3, 166.9, 158.7, 153.2, 151.0, 140.1, 138.7, 138.3, 134.3, 133.7, 130.9, 128.8, 128.3, 127.0, 126.3, 125.6, 119.8, 118.8, 115.8, 106.9, 84.4, 60.7, 37.9, 37.5, 36.3, 25.0, 20.8. **IR** (KBr)  $\nu$  2921, 2850, 1658, 1588, 1406, 1340, 1142, 969, 861, 807, 702. **HRMS** (ESI) *m/z* Calcd. for C<sub>32</sub>H<sub>39</sub>N<sub>7</sub>BBrClO<sub>4</sub><sup>+</sup> [M+H]<sup>+</sup> 710.2023; Found: 710.2018.

***N*<sup>2</sup>-(3-((6-bromopyridin-2-yl)(methyl)amino)-5-methylphenyl)-*N*<sup>2</sup>,*N*<sup>4</sup>,*N*<sup>4</sup>,*N*<sup>6</sup>-**

**tetramethyl-*N*<sup>6</sup>-(3-(4,4,5,5-tetramethyl-1,3,2-dioxaborolan-2-yl)phenyl)-1,3,5-triazine-2,4,6-triamine (6ad)**

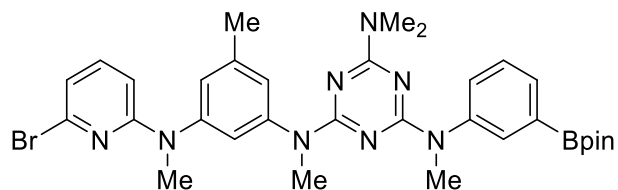

Chemical Formula: C<sub>32</sub>H<sub>40</sub>BBBrN<sub>8</sub>O<sub>2</sub>; Molecular Weight: 658.2551

65.3 mg, 46% yield (calculated over 3 steps), colorless oil.

<sup>1</sup>H NMR (400 MHz, CDCl<sub>3</sub>) δ 7.79 (s, 1H), 7.56 (d, *J* = 7.2 Hz, 1H), 7.43 (d, *J* = 8.8 Hz, 1H), 7.29 (d, *J* = 8.0 Hz, 1H), 7.07-7.03 (m, 3H), 6.80 (s, 1H), 6.70 (d, *J* = 7.2 Hz, 1H), 6.34 (d, *J* = 8.4 Hz, 1H), 3.45 (s, 3H), 3.42-3.41 (m, 6H), 2.97 (m, 6H), 2.33 (s, 3H), 1.33 (s, 12H). <sup>13</sup>C NMR (100 MHz, CDCl<sub>3</sub>) δ 165.7, 165.6, 165.6, 159.1, 146.7, 145.3, 144.6, 140.0, 139.6, 138.5, 132.2, 131.2, 129.8, 127.6, 124.8, 123.6, 122.3, 115.5, 107.3, 83.9, 38.5, 37.3, 37.2, 35.9, 25.0, 21.6. IR (KBr) ν 2925, 2852, 1657, 1590, 1421, 1341, 1144, 971, 808, 702. HRMS (ESI) *m/z* Calcd. For C<sub>32</sub>H<sub>41</sub>N<sub>8</sub>BBBrO<sub>2</sub><sup>+</sup> [M+H]<sup>+</sup> 659.2638; Found: 659.2642.

## 5. Synthesis of tetramer **6ab**

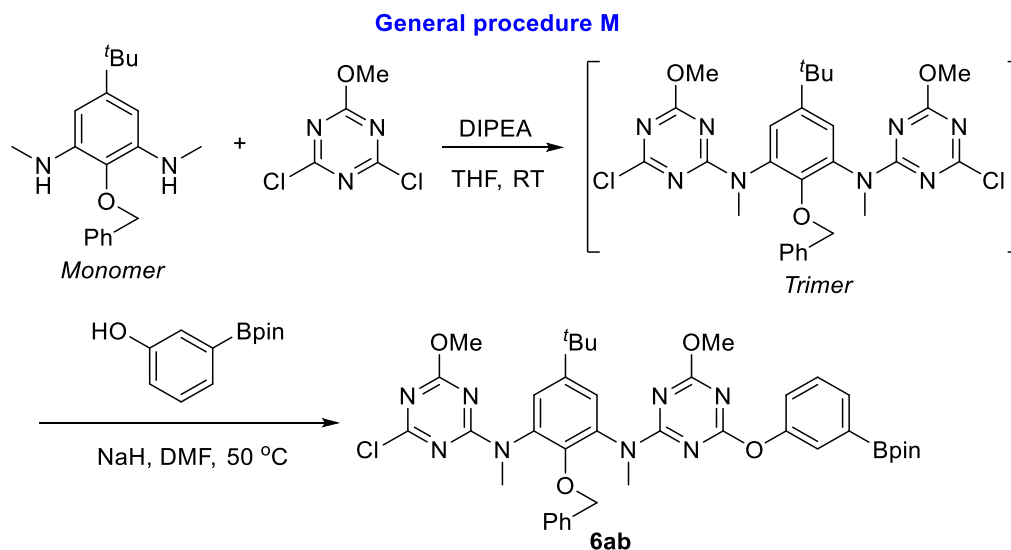

**General procedure M:** To a 50 mL round bottom flask was added 2,4-dichloro-6-methoxy-1,3,5-triazine (81.0 mg, 0.44 mmol, 2.2 equiv), DIPEA (65.0 mg, 0.5 mmol, 2.5 equiv), and THF (15 mL). A solution of *Monomer* (59.6 mg, 0.2 mmol) in 5 mL THF was slowly added at room temperature and stirred overnight. The reaction mixture was quenched with H<sub>2</sub>O and the organic layer was extracted with EtOAc, washed with brine and dried over anhydrous Na<sub>2</sub>SO<sub>4</sub>. Solvents evaporated in vacuo to obtain crude product *Trimer*, which was used for next step without further purification.

To a round bottom flask was added *Trimer* (crude product, approximately 0.2 mmol), NaH (12.0 mg, 0.3 mmol, 60% dispersion in mineral oil, 1.5 equiv), 3-(4,4,5,5-tetramethyl-1,3,2-dioxaborolan-2-yl)phenol (48.5 mg, 0.22 mmol, 1.1 equiv). To the mixture was added DMF (10 mL) under argon at 0 °C. The mixture was then stirred at room temperature for 12 h until the starting material was consumed completely. The reaction mixture was quenched with H<sub>2</sub>O and the organic layer was extracted with EtOAc, washed with brine and dried over anhydrous Na<sub>2</sub>SO<sub>4</sub>. After solvent evaporation, the residue was subjected to column chromatography on silica gel (PE/EtOAc = 20:1) to give the desired linear tetramer **6ab**.

**2-(benzyloxy)-5-(tert-butyl)-N<sup>1</sup>-(4-chloro-6-methoxy-1,3,5-triazin-2-yl)-N<sup>3</sup>-(4-methoxy-6-(3-(4,4,5,5-tetramethyl-1,3,2-dioxaborolan-2-yl)phenoxy)-1,3,5-**

**triazin-2-yl)-*N*<sup>1</sup>,*N*<sup>3</sup>-dimethylbenzene-1,3-diamine (6ab)**

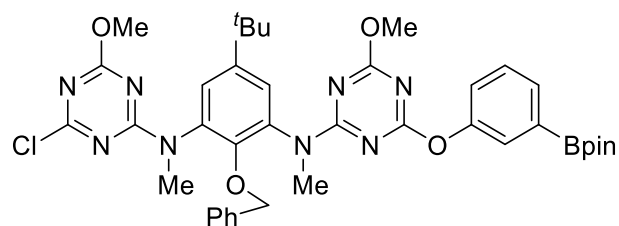

Chemical Formula: C<sub>39</sub>H<sub>46</sub>BClN<sub>8</sub>O<sub>6</sub>; Molecular Weight: 769.1070

70.7 mg, 46% yield (calculated over 2 steps), colorless oil.

<sup>1</sup>H NMR (400 MHz, DMSO-*d*<sub>6</sub>, 373 K) δ 7.58-7.42 (m, 3H), 7.35-7.25 (m, 2H), 7.21-7.16 (m, 4H), 7.03 (d, *J* = 2.0 Hz, 2H), 4.66 (s, 2H), 3.92-3.66 (m, 6H), 3.32 (s, 6H), 1.31 (s, 12H), 1.27 (s, 9H). <sup>13</sup>C NMR (100 MHz, DMSO-*d*<sub>6</sub>, 373 K) δ 171.2, 167.3, 165.9, 151.3, 146.7, 136.5, 136.2, 135.6, 130.7, 128.5, 127.7, 127.5, 127.2, 126.7, 124.9, 124.2, 83.5, 74.0, 54.2, 53.7, 38.9, 37.5, 37.0, 33.9, 30.6, 27.6, 24.5, 24.2. IR (KBr) ν 2925, 2854, 1563, 1466, 1370, 1143, 808, 703. HRMS (ESI) *m/z* Calcd. for C<sub>39</sub>H<sub>47</sub>N<sub>8</sub>BClO<sub>6</sub><sup>+</sup> [M+H]<sup>+</sup> 769.3395; Found: 769.3401.

## 6. Synthesis of tetramer 6ac

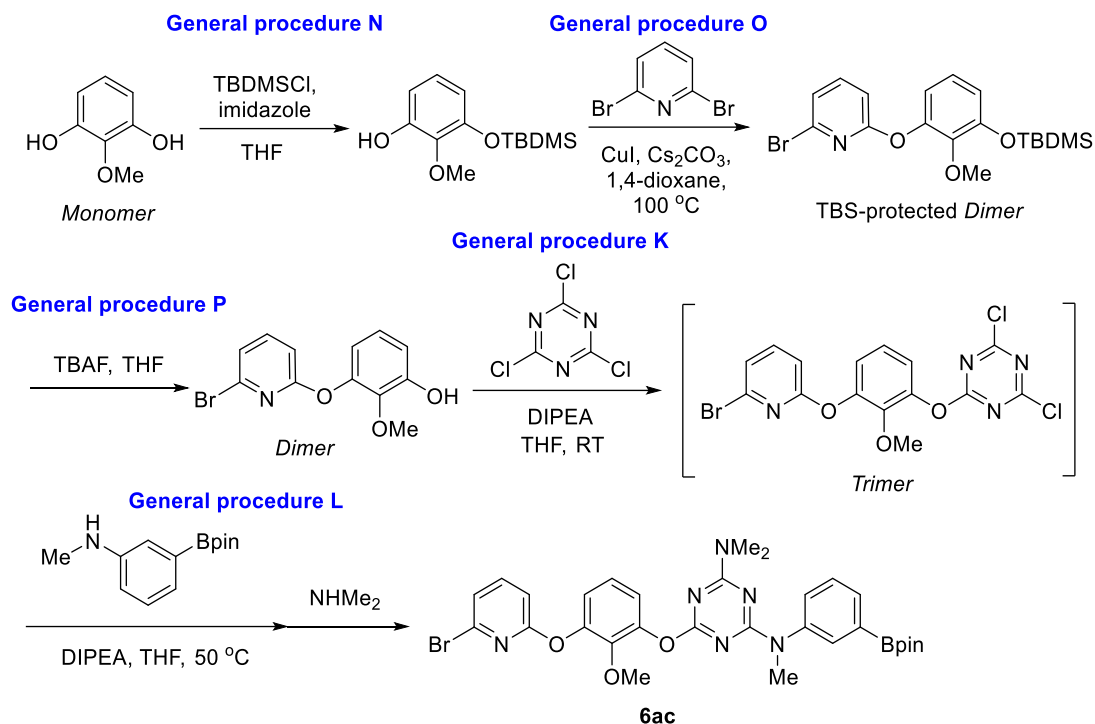

**General procedure N:** To a round bottom flask was added *Monomer* 2-methoxybenzene-1,3-diol (700.0 mg, 5 mmol), imidazole (510.0 mg, 7.5 mmol, 1.5 equiv), and THF (10 mL). To the mixture was slowly added TBDMSCl (825.0 mg, 5.5 mmol, 1.1 equiv) at 0 °C. The mixture was then stirred at room temperature for 12 h until the starting material was consumed completely. The reaction mixture was quenched with H<sub>2</sub>O and the organic layer was extracted with EtOAc, washed with brine and dried over anhydrous Na<sub>2</sub>SO<sub>4</sub>. Solvents evaporated in vacuo to obtain the *TBS-protected monomer* as a crude product, which was used for next step without further purification.

**General procedure O:** To a round bottom flask was added *TBS-protected monomer* (crude product, approximately 5 mmol), CuI (96 mg, 0.5 mmol, 10 mol%), Cs<sub>2</sub>CO<sub>3</sub> (3.3 g, 10 mmol, 2 equiv) and 2,6-dibromopyridine (1.8 g, 7.5 mmol, 1.5 equiv). 1,4-dioxane (30 mL) was added and the reaction was stirred under argon at 100 °C overnight. The reaction mixture was quenched with H<sub>2</sub>O and the organic layer was extracted with EtOAc, washed with brine and dried over anhydrous Na<sub>2</sub>SO<sub>4</sub>. Solvents evaporated in

vacuo to obtain the TBS-protected *Dimer* and trimer as a crude product

**General procedure P:** To a round bottom flask was added the TBS-protected *Dimer* (crude product, approximately 5 mmol) and THF (10 mL). To the mixture was slowly added the solution of TBAF (5 mL, 5 mmol, 1M in THF, 1.0 equiv). The mixture was then stirred at room temperature for 12 h until the starting material was consumed completely. The reaction mixture was quenched with H<sub>2</sub>O and the organic layer was extracted with EtOAc, washed with brine and dried over anhydrous Na<sub>2</sub>SO<sub>4</sub>. After solvent evaporation, the residue was subjected to column chromatography on silica gel (PE/EtOAc = 10:1) to give the *Dimer*.

The desired tetramer **6ac** was obtained following **General procedure K** and **L**.

**6-(3-((6-bromopyridin-2-yl)oxy)-2-methoxyphenoxy)-N<sup>2</sup>,N<sup>2</sup>,N<sup>4</sup>-trimethyl-N<sup>4</sup>-(3-(4,4,5,5-tetramethyl-1,3,2-dioxaborolan-2-yl)phenyl)-1,3,5-triazine-2,4-diamine (6ac)**

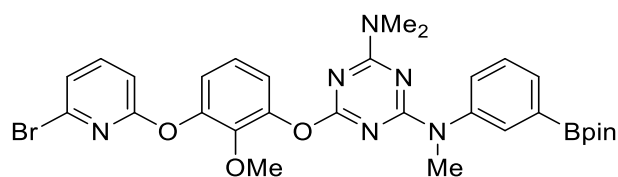

Chemical Formula: C<sub>30</sub>H<sub>34</sub>BBrN<sub>6</sub>O<sub>5</sub>; Molecular Weight: 649.3530

53.3 mg, 3% yield (calculated yield based on *Monomer*), colorless oil.

<sup>1</sup>H NMR (400 MHz, CDCl<sub>3</sub>, 333 K) δ 7.72 (s, 1H), 7.59 (d, *J* = 7.2 Hz, 1H), 7.43 (t, *J* = 8.0 Hz, 1H), 7.38-7.35 (m, 1H), 7.28 (t, *J* = 7.6 Hz, 1H), 7.15 (d, *J* = 8.0 Hz, 1H), 7.04-6.98 (m, 2H), 6.98 (t, *J* = 5.2 Hz, 1H), 6.61 (d, *J* = 8.0 Hz, 1H), 3.73 (s, 3H), 3.44 (s, 3H), 2.99 (s, 6H), 1.34 (s, 12H). <sup>13</sup>C NMR (100 MHz, CDCl<sub>3</sub>, 333 K) δ 171.0, 166.9, 163.3, 147.1, 146.9, 145.4, 144.2, 141.1, 139.4, 132.4, 132.0, 129.8, 127.9, 123.1, 122.3, 121.2, 119.8, 108.6, 84.0, 61.3, 37.7, 36.3, 25.1. IR (KBr) ν 2976, 2928, 1563, 1466, 1368, 1206, 1144, 809, 704. HRMS (ESI) *m/z* Calcd. for C<sub>30</sub>H<sub>35</sub>N<sub>6</sub>BBro<sub>5</sub><sup>+</sup> [M+H]<sup>+</sup> 649.1940; Found: 649.1941.

## 7. Synthesis of racemic **5**

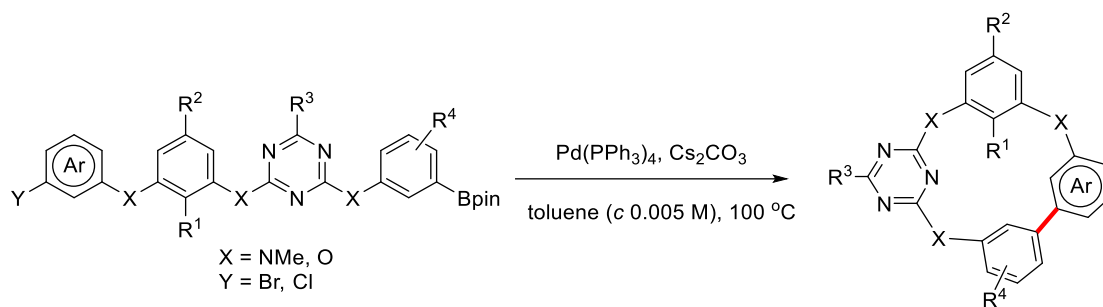

A mixture of Pd(PPh<sub>3</sub>)<sub>4</sub> (15 mg, 0.013 mmol, 25 mol%), Cs<sub>2</sub>CO<sub>3</sub> (49 mg, 0.15 mmol, 3 equiv) in dry toluene (8 mL) was heated to 100 °C in a two-neck round bottom flask under argon. To the resulting yellow solution was slowly added linear tetramer **6** (0.05 mmol) in dry toluene (2 mL) with an injection pump during 1 h. The reaction was refluxed for 12 h until the reaction was complete (monitored by TLC). The reaction was cooled to room temperature and filtered through celite. The filtrate was concentrated in vacuo. The residue was purified by column chromatography on silica gel, eluting with PE/EtOAc 8:1~1:1 to afford *rac*-**5**.



## 8. Catalytic enantioselective synthesis of **5**

**Table S1.** Optimization of chiral ligands

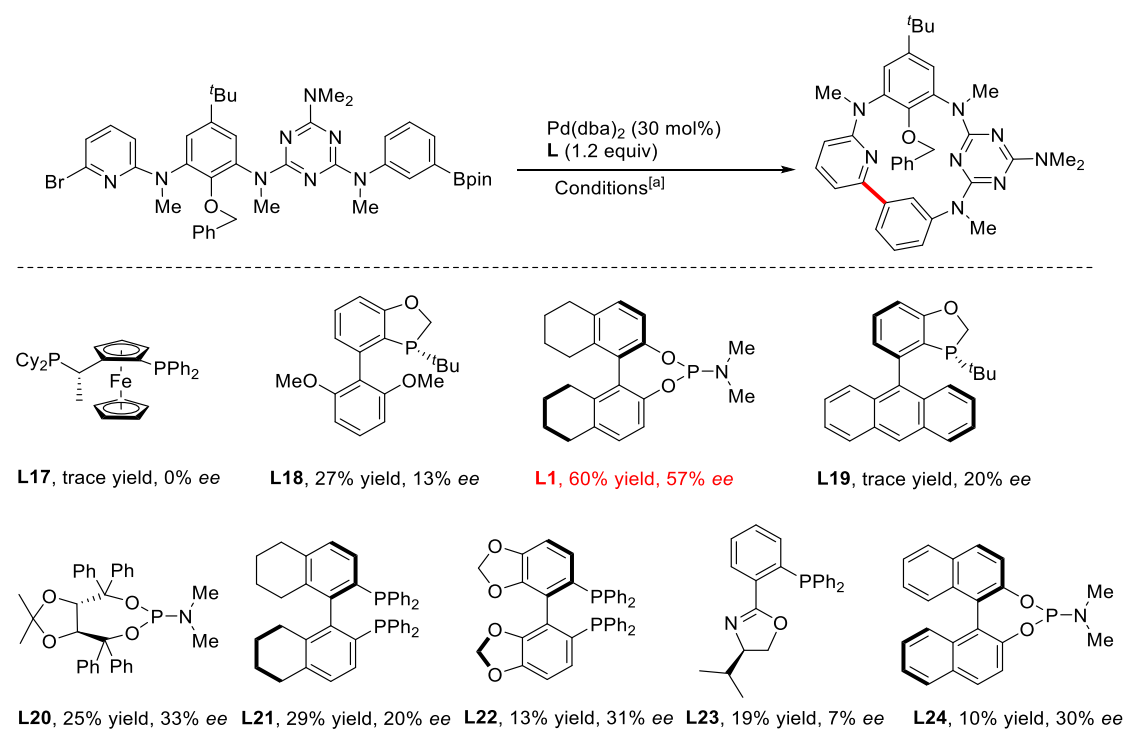

<sup>[a]</sup>Conditions:  $\text{Pd}(\text{dba})_2$  (30 mol%), **L** (1.2 equiv),  $\text{Cs}_2\text{CO}_3$  (3 equiv), 1,4-dioxane (*c* 0.005 M), Schlenk tube, inert atmosphere, **6** (0.04 mmol) in 1,4-dioxane (2 mL) was added with an injection pump during 1 h, isolated yield.

**Table S2.** Optimization of reaction conditions using  $\text{Pd}(\text{dba})_2/\mathbf{L1}$  as chiral catalyst

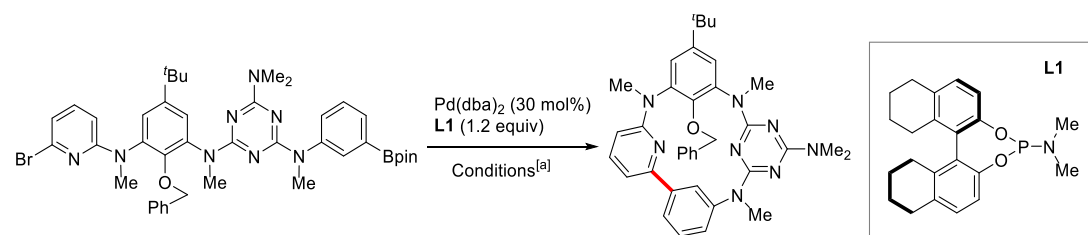

| Entry | Solvent     | Base                     | T / °C | Yield / % | ee / % |
|-------|-------------|--------------------------|--------|-----------|--------|
| 1     | 1,4-dioxane | $\text{Cs}_2\text{CO}_3$ | 100    | 60        | 57     |
| 2     | Toluene     | $\text{Cs}_2\text{CO}_3$ | 100    | 53        | 66     |
| 3     | DMF         | $\text{Cs}_2\text{CO}_3$ | 100    | 40        | 40     |
| 4     | THF         | $\text{Cs}_2\text{CO}_3$ | reflux | 36        | 32     |

|    |                          |                                 |        |       |    |
|----|--------------------------|---------------------------------|--------|-------|----|
| 5  | CH <sub>3</sub> CN       | Cs <sub>2</sub> CO <sub>3</sub> | reflux | 5     | 5  |
| 6  | DME                      | Cs <sub>2</sub> CO <sub>3</sub> | reflux | 44    | 0  |
| 7  | <i>o</i> -xylene         | Cs <sub>2</sub> CO <sub>3</sub> | 100    | 54    | 65 |
| 8  | <i>m</i> -xylene         | Cs <sub>2</sub> CO <sub>3</sub> | 100    | 58    | 66 |
| 9  | <i>p</i> -xylene         | Cs <sub>2</sub> CO <sub>3</sub> | 100    | 7     | 33 |
| 10 | <i>o/m</i> -xylene = 1:1 | Cs <sub>2</sub> CO <sub>3</sub> | 100    | 31    | 40 |
| 11 | xylenes                  | Cs <sub>2</sub> CO <sub>3</sub> | 100    | 30    | 6  |
| 12 | Benzene                  | Cs <sub>2</sub> CO <sub>3</sub> | reflux | NR    | ND |
| 13 | Toluene                  | Rb <sub>2</sub> CO <sub>3</sub> | 100    | 38    | 18 |
| 14 | Toluene                  | K <sub>2</sub> CO <sub>3</sub>  | 100    | Trace | 0  |
| 15 | Toluene                  | Na <sub>2</sub> CO <sub>3</sub> | 100    | NR    | ND |
| 16 | Toluene                  | KO <sup>t</sup> Bu              | 100    | 37    | 5  |
| 17 | Toluene                  | NaO <sup>t</sup> Bu             | 100    | 48    | 7  |
| 18 | Toluene                  | CsOH                            | 100    | 41    | 0  |
| 19 | Toluene                  | KOH                             | 100    | 7     | 19 |
| 20 | Toluene                  | NaOH                            | 100    | 32    | 24 |
| 21 | Toluene                  | K <sub>3</sub> PO <sub>4</sub>  | 100    | 27    | 20 |
| 22 | Toluene                  | K <sub>2</sub> HPO <sub>4</sub> | 100    | NR    | ND |
| 23 | Toluene                  | KF                              | 100    | NR    | ND |
| 24 | Toluene                  | KOAc                            | 100    | NR    | ND |

<sup>[a]</sup>Conditions: Pd(dba)<sub>2</sub> (30 mol%), **L1** (1.2 equiv), base (3 equiv), solvent (*c* 0.005 M), Schlenk tube, inert atmosphere, **6** (0.04 mmol) in solvent (2 mL) was added with an injection pump during 1 h, isolated yield.

**Table S3.** Optimization of reaction conditions using Pd(dba)<sub>2</sub>/L15 as chiral catalyst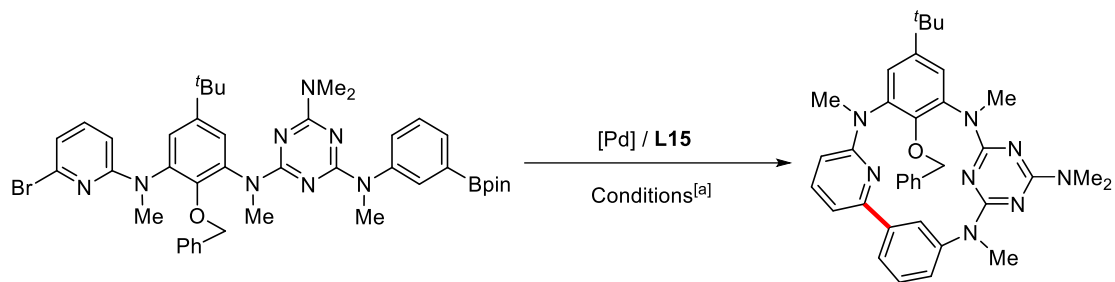

| Entry | [Pd] (mol%)                                                 | [Pd] / [L] | t / h  | Yield / % | ee / % |
|-------|-------------------------------------------------------------|------------|--------|-----------|--------|
| 1     | Pd(dba) <sub>2</sub> (30)                                   | 1 : 4      | 12     | 66        | 70     |
| 2     | Pd(dba) <sub>2</sub> (30)                                   | 1 : 4.05   | 12     | 70        | 90     |
| 3     | Pd(dba) <sub>2</sub> (25)                                   | 1 : 4.05   | 12     | 63        | 91     |
| 4     | Pd(dba) <sub>2</sub> (20)                                   | 1 : 4.05   | 12     | 63        | 89     |
| 5     | Pd(dba) <sub>2</sub> (15)                                   | 1 : 4.05   | 12     | 66        | 86     |
| 6     | Pd(dba) <sub>2</sub> (15)                                   | 1 : 4.05   | 24     | 70        | 87     |
| 7     | Pd(dba) <sub>2</sub> (10)                                   | 1 : 4.05   | 100    | 47        | 75     |
| 8     | Pd(dba) <sub>2</sub> (20)                                   | 1 : 4.05   | 100    | 72        | 88     |
| 9     | PdBr <sub>2</sub> (25)                                      | 1 : 4.05   | 100    | 60        | 75     |
| 10    | Pd(CF <sub>3</sub> COO) <sub>2</sub> (30)                   | 1 : 4.05   | 100    | 58        | 80     |
| 11    | Pd(OTf) <sub>2</sub> (CH <sub>3</sub> CN) <sub>2</sub> (30) | 1 : 4.05   | 100    | 62        | 86     |
| 12    | Pd <sub>2</sub> (dba) <sub>3</sub> (12)                     | 1 : 4.05   | reflux | 65        | 86     |
| 13    | PdCl <sub>2</sub> (CH <sub>3</sub> CN) <sub>2</sub> (20)    | 1 : 4.05   | 100    | 62        | 85     |
| 14    | Pd(NO <sub>3</sub> ) <sub>2</sub> (20)                      | 1 : 4.05   | 100    | trace     | 85     |
| 15    | Pd <sub>2</sub> (dba) <sub>3</sub> •toluene (10)            | 1 : 4.05   | 100    | 75        | 88     |

<sup>[a]</sup>Conditions: Catalyst (30 mol%), L15 (1.2 equiv), base (3 equiv), toluene (*c* 0.005 M), Schlenk tube, inert atmosphere, **6** (0.04 mmol) in toluene (2 mL) was added with an injection pump during 1 h, isolated yield.

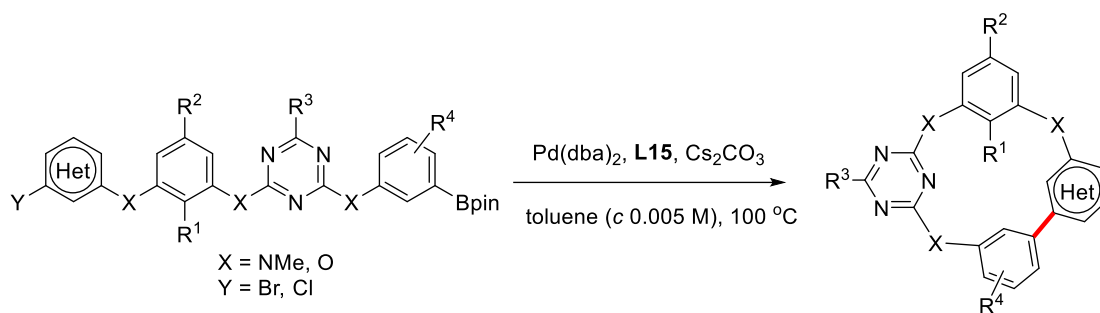

A mixture of  $\text{Pd(dba)}_2$  (7 mg, 0.012 mmol, 30 mol%), **L15** (16 mg, 0.04 mmol, 1.2 equiv),  $\text{Cs}_2\text{CO}_3$  (39 mg, 0.12 mmol, 3 equiv) in dry toluene (5 mL) was heated to 100 °C in a two-neck round bottom flask under argon. To the resulting yellow solution was slowly added linear tetramer **6** (0.04 mmol) in dry toluene (2 mL) with an injection pump during 1 h. The reaction was refluxed for 12 h until the reaction was complete (monitored by TLC). The reaction was cooled to room temperature and filtered through celite. The filtrate was concentrated in vacuo. The residue was purified by column chromatography on silica gel, eluting with PE/EtOAc 8:1~1:1 to afford **5**.

**6<sup>2</sup>-(benzyloxy)-6<sup>5</sup>-(*tert*-butyl)-*N,N*,3,5,7-pentamethyl-3,5,7-triaza-4(2,4)-triazina-1(2,6)-pyridina-2,6(1,3)-dibenzenacycloheptaphan-4<sup>6</sup>-amine (**5a**)**

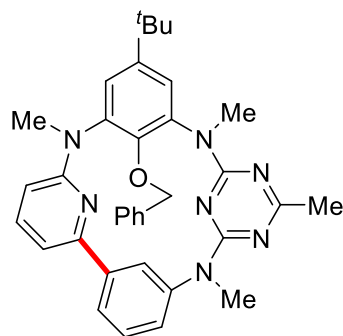

Chemical Formula:  $\text{C}_{36}\text{H}_{40}\text{N}_8\text{O}$ ; Molecular Weight: 600.7710

21.0 mg, 70% yield, white solid. M.P. = 238-240 °C

<sup>1</sup>H NMR (400 MHz,  $\text{CDCl}_3$ )  $\delta$  8.91 (s, 1H), 7.54 (t,  $J = 8.0$  Hz, 1H), 7.22 (t,  $J = 8.0$  Hz, 1H), 7.17-7.15 (m, 1H), 7.13-7.11 (m, 3H), 7.05 (d,  $J = 2.4$  Hz, 1H), 7.05-7.03 (m, 1H), 7.01-7.00 (m, 3H), 6.94 (d,  $J = 7.2$  Hz, 1H), 6.50 (d,  $J = 8.0$  Hz, 1H), 4.92 (d,  $J = 12.4$  Hz, 1H), 4.83 (d,  $J = 12.0$  Hz, 1H), 3.60 (s, 3H), 3.39 (s, 3H), 3.37 (s, 3H), 3.19

(s, 6H), 1.24 (s, 9H).  $^{13}\text{C}$  NMR (100 MHz,  $\text{CDCl}_3$ )  $\delta$  166.51, 166.48, 165.4, 157.1, 156.8, 151.2, 146.5, 145.0, 141.0, 140.0, 138.9, 137.8, 137.4, 128.0, 127.5, 127.0, 126.8, 124.1, 123.6, 122.2, 119.6, 119.4, 109.9, 102.7, 74.0, 40.9, 37.9, 37.6, 36.0, 34.5, 31.5. IR (KBr)  $\nu$  2926, 2858, 1571, 1533, 1489, 1377, 1244, 807, 778, 733. HRMS (ESI)  $m/z$  Calcd. for  $\text{C}_{36}\text{H}_{41}\text{N}_8\text{O}^+$   $[\text{M}+\text{H}]^+$  601.3398; Found: 601.3388. HPLC: AD-H column, Hexane : *i*-PrOH = 80 : 20, 24 °C, 0.5 mL/min flow rate, detection at 254 nm,  $t_1$  = 10.1 min (minor),  $t_2$  = 21.2 min (major).  $[\alpha]_{\text{D}}^{25}$  = -36.2 ( $c$  = 0.002,  $\text{CH}_3\text{OH}$ ) for 90.6% *ee*.

**6<sup>2</sup>-(benzyloxy)-6<sup>5</sup>-(*tert*-butyl)-*N,N*-diethyl-3,5,7-trimethyl-3,5,7-triaza-4(2,4)-triazina-1(2,6)-pyridina-2,6(1,3)-dibenzenacycloheptaphan-4<sup>6</sup>-amine (5b)**

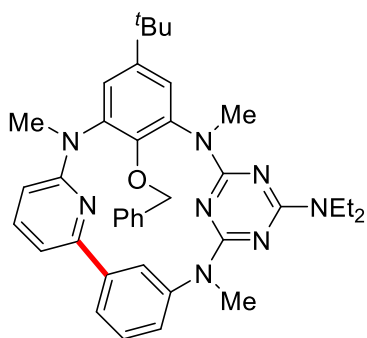

Chemical Formula:  $\text{C}_{38}\text{H}_{44}\text{N}_8\text{O}$ ; Molecular Weight: 628.8250

19.5 mg, 62% yield, colorless oil.

$^1\text{H}$  NMR (400 MHz,  $\text{CDCl}_3$ )  $\delta$  8.89 (s, 1H), 7.56 (t,  $J$  = 8.0 Hz, 1H), 7.23 (d,  $J$  = 8.0 Hz, 1H), 7.16 (d,  $J$  = 8.4 Hz, 1H), 7.14-7.12 (m, 3H), 7.07 (d,  $J$  = 2.4 Hz, 1H), 7.05-7.00 (m, 4H), 6.94 (d,  $J$  = 7.6 Hz, 1H), 6.54 (d,  $J$  = 6.4 Hz, 1H), 4.92 (d,  $J$  = 12.4 Hz, 1H), 4.82 (d,  $J$  = 12.0 Hz, 1H), 3.72-3.54 (m, 4H), 3.58 (s, 3H), 3.40 (s, 3H), 3.38 (s, 3H), 1.25 (s, 9H), 1.23-1.21 (m, 6H).  $^{13}\text{C}$  NMR (100 MHz,  $\text{CDCl}_3$ )  $\delta$  166.6, 166.5, 164.2, 157.0, 151.2, 146.6, 145.2, 140.9, 139.9, 138.9, 137.9, 137.6, 128.0, 127.5, 127.0, 126.9, 123.9, 123.7, 122.2, 119.5, 119.3, 109.9, 102.9, 74.0, 41.4, 40.9, 37.8, 37.7, 34.5, 31.6, 13.6. IR (KBr)  $\nu$  2961, 2926, 2855, 1769, 1558, 1356, 1259, 913, 851, 749. HRMS (ESI)  $m/z$  Calcd. for  $\text{C}_{38}\text{H}_{45}\text{N}_8\text{O}^+$   $[\text{M}+\text{H}]^+$  629.3711; Found: 629.3693. HPLC: AD-H column, Hexane : *i*-PrOH = 80 : 20, 24 °C, 0.5 mL/min flow rate, detection at 254 nm,  $t_1$  = 9.3 min (minor),  $t_2$  = 32.2 min (major).  $[\alpha]_{\text{D}}^{25}$  = -31.8 ( $c$  = 0.002,  $\text{CH}_3\text{OH}$ )

for 90.0% *ee*.

**6<sup>2</sup>-(benzyloxy)-6<sup>5</sup>-(*tert*-butyl)-3,5,7-trimethyl-4<sup>6</sup>-(pyrrolidin-1-yl)-3,5,7-triaza-4(2,4)-triazina-1(2,6)-pyridina-2,6(1,3)-dibenzenacycloheptaphane (5c)**

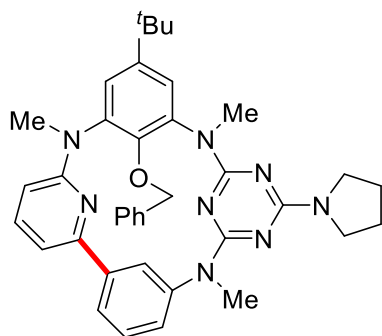

Chemical Formula: C<sub>38</sub>H<sub>42</sub>N<sub>8</sub>O; Molecular Weight: 626.8090

20.7 mg, 66% yield, colorless oil.

**<sup>1</sup>H NMR** (400 MHz, CDCl<sub>3</sub>)  $\delta$  8.90 (s, 1H), 7.55 (t, *J* = 7.6 Hz, 1H), 7.22 (t, *J* = 7.6 Hz, 1H), 7.16 (d, *J* = 7.2 Hz, 1H), 7.12-7.11 (m, 3H), 7.06-7.04 (m, 2H), 7.01-6.99 (m, 3H), 6.94 (d, *J* = 7.6 Hz, 1H), 6.51 (d, *J* = 8.4 Hz, 1H), 4.92 (d, *J* = 12.4 Hz, 1H), 4.84 (d, *J* = 12.0 Hz, 1H), 3.62 (t, *J* = 6.0 Hz, 4H), 3.60 (s, 3H), 3.40 (s, 3H), 3.37 (s, 3H), 1.97 (t, *J* = 6.4 Hz), 1.24 (s, 9H). **<sup>13</sup>C NMR** (100 MHz, CDCl<sub>3</sub>)  $\delta$  166.4, 166.3, 163.4, 157.1, 156.8, 151.2, 146.5, 145.1, 141.0, 140.0, 138.9, 137.8, 137.5, 128.0, 127.5, 126.9, 126.8, 123.8, 123.6, 122.2, 119.5, 119.2, 109.9, 102.7, 73.9, 46.0, 40.9, 37.8, 37.6, 34.5, 31.6, 25.6. **IR** (KBr)  $\nu$  2923, 2852, 1572, 1519, 1470, 1390, 1255, 966, 780. **HRMS** (APCI) *m/z* Calcd. for C<sub>38</sub>H<sub>43</sub>N<sub>8</sub>O<sup>+</sup> [M+H]<sup>+</sup> 627.3554; Found: 627.3540. **HPLC**: AD-H column, Hexane : *i*-PrOH = 80 : 20, 24 °C, 0.5 mL/min flow rate, detection at 254 nm, *t*<sub>1</sub> = 12.9 min (minor), *t*<sub>2</sub> = 43.4 min (major). [ $\alpha$ ]<sub>D</sub><sup>25</sup> = -33.6 (*c* = 0.002, CH<sub>3</sub>OH) for 89.0% *ee*.

**6<sup>2</sup>-(benzyloxy)-6<sup>5</sup>-(*tert*-butyl)-4<sup>6</sup>-methoxy-3,5,7-trimethyl-3,5,7-triaza-4(2,4)-triazina-1(2,6)-pyridina-2,6(1,3)-dibenzenacycloheptaphane (5d)**

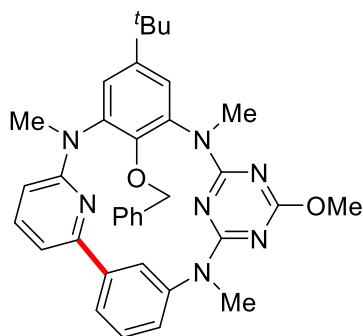

Chemical Formula: C<sub>35</sub>H<sub>37</sub>N<sub>7</sub>O<sub>2</sub>; Molecular Weight: 587.7280

21.2 mg, 72% yield, white solid. M.P. = 232-233 °C

<sup>1</sup>H NMR (400 MHz, Acetone-*d*<sub>6</sub>) δ 8.89 (s, 1H), 7.69 (t, *J* = 7.6 Hz, 1H), 7.30 (t, *J* = 7.6 Hz, 1H), 7.25-7.24 (m, 2H), 7.21-7.19 (m, 5H), 7.14-7.12 (m, 2H), 7.02 (d, *J* = 7.6 Hz, 1H), 6.77 (d, *J* = 8.4 Hz, 1H), 5.06 (d, *J* = 12.0 Hz, 1H), 4.90 (d, *J* = 12.4 Hz, 1H), 3.99 (s, 3H), 3.66 (s, 3H), 3.54 (s, 3H), 3.46 (s, 3H), 1.29 (s, 9H). <sup>13</sup>C NMR (100 MHz, Acetone-*d*<sub>6</sub>) δ 170.6, 167.4, 167.0, 157.3, 156.4, 151.2, 146.7, 144.7, 141.5, 140.6, 138.6, 138.1, 137.2, 128.0, 127.8, 127.2, 126.9, 124.8, 122.8, 122.5, 120.5, 120.1, 109.6, 103.1, 74.1, 53.1, 40.7, 37.8, 36.8, 34.2, 30.8. IR (KBr) ν 2925, 2854, 1731, 1607, 1532, 1372, 1245, 1093, 978, 806, 694. HRMS (ESI) *m/z* Calcd. for C<sub>35</sub>H<sub>38</sub>N<sub>7</sub>O<sub>2</sub><sup>+</sup> [M+H]<sup>+</sup> 588.3082; Found: 588.3077. HPLC: AD-H column, Hexane : *i*-PrOH = 84 : 16, 24 °C, 0.5 mL/min flow rate, detection at 254 nm, *t*<sub>1</sub> = 9.7 min (minor), *t*<sub>2</sub> = 12.5 min (major). [α]<sub>D</sub><sup>25</sup> = -30.5 (*c* = 0.002, CH<sub>3</sub>OH) for 90.4% *ee*.

**6<sup>2</sup>-(benzyloxy)-6<sup>5</sup>-(tert-butyl)-*N,N*,2<sup>5</sup>,3,5,7-hexamethyl-3,5,7-triaza-4(2,4)-triazina-1(2,6)-pyridina-2,6(1,3)-dibenzenacycloheptaphan-4<sup>6</sup>-amine (5e)**

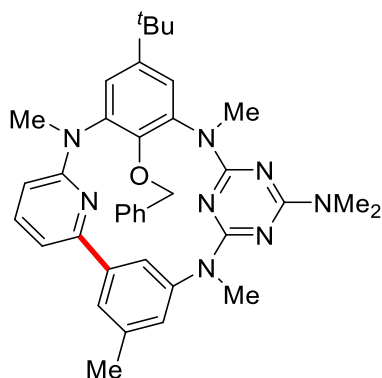

Chemical Formula: C<sub>37</sub>H<sub>42</sub>N<sub>8</sub>O; Molecular Weight: 614.7980

22.1 mg, 72% yield, colorless oil.

<sup>1</sup>H NMR (400 MHz, CDCl<sub>3</sub>) δ 8.65 (s, 1H), 7.54 (t, *J* = 7.6 Hz, 1H), 7.13-7.11 (m, 3H), 7.05 (d, *J* = 2.4 Hz, 1H), 7.00-6.98 (m, 4H), 6.92 (d, *J* = 7.2 Hz, 1H), 6.87 (s, 1H), 6.49 (d, *J* = 8.0 Hz, 1H), 4.91 (d, *J* = 12.0 Hz, 1H), 4.83 (d, *J* = 12.0 Hz, 1H), 3.58 (s, 3H), 3.38 (s, 3H), 3.36 (s, 3H), 3.18 (s, 6H), 2.33 (s, 3H), 1.24 (s, 9H). <sup>13</sup>C NMR (100 MHz, CDCl<sub>3</sub>) δ 166.7, 166.5, 165.3, 159.2, 157.0, 156.8, 151.2, 146.6, 145.9, 141.8, 140.0, 138.9, 137.9, 137.5, 128.0, 127.0, 126.8, 123.6, 122.3, 117.1, 109.8, 106.2, 104.4, 102.9, 74.0, 55.6, 40.9, 37.8, 37.6, 36.0, 34.5, 31.6, 14.3. IR (KBr) ν 2965, 2925, 2854, 1573, 1537, 1487, 1379, 1247, 1062, 791, 733. HRMS (ESI) *m/z* Calcd. for C<sub>37</sub>H<sub>43</sub>N<sub>8</sub>O<sup>+</sup> [M+H]<sup>+</sup> 615.3554; Found: 615.3537. HPLC: AD-H column, Hexane : *i*-PrOH = 80 : 20, 24 °C, 0.5 mL/min flow rate, detection at 315 nm, *t*<sub>1</sub> = 11.4 min (minor), *t*<sub>2</sub> = 20.6 min (major). [α]<sub>D</sub><sup>25</sup> = -27.8 (*c* = 0.002, CH<sub>3</sub>OH) for 93.0% *ee*.

**6<sup>2</sup>-(benzyloxy)-6<sup>5</sup>-(*tert*-butyl)-2<sup>5</sup>-methoxy-*N,N*,3,5,7-pentamethyl-3,5,7-triaza-4(2,4)-triazina-1(2,6)-pyridina-2,6(1,3)-dibenzenacycloheptaphan-4<sup>6</sup>-amine (5f)**

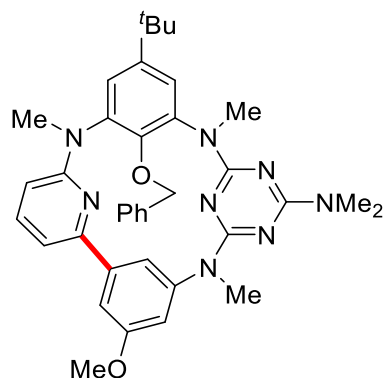

Chemical Formula: C<sub>37</sub>H<sub>42</sub>N<sub>8</sub>O<sub>2</sub>; Molecular Weight: 630.7970

23.0 mg, 73% yield, colorless oil.

<sup>1</sup>H NMR (400 MHz, CDCl<sub>3</sub>) δ 8.56 (dd, *J* = 2.4 Hz, 1.2 Hz, 1H), 7.54 (dd, *J* = 8.0 Hz, 7.2 Hz, 1H), 7.12-7.10 (m, 3H), 7.04 (d, *J* = 2.4 Hz, 1H), 7.00 (d, *J* = 2.8 Hz, 1H), 6.99-6.96 (m, 2H), 6.92 (d, *J* = 7.2 Hz, 1H), 6.72 (dd, *J* = 2.4 Hz, 1.2 Hz, 1H), 6.18 (t, *J* =



2.4 Hz, 1H), 6.49 (d,  $J = 8.4$  Hz, 1H), 4.88 (d,  $J = 12.0$  Hz, 1H), 4.81 (d,  $J = 12.0$  Hz, 1H), 3.80 (s, 3H), 3.58 (s, 3H), 3.38 (s, 3H), 3.36 (s, 3H), 3.18 (s, 6H), 1.24 (s, 9H).  $^{13}\text{C}$  NMR (100 MHz,  $\text{CDCl}_3$ )  $\delta$  166.7, 166.5, 165.4, 159.2, 157.0, 156.8, 151.2, 146.6, 145.9, 141.8, 140.0, 138.9, 137.9, 137.5, 128.0, 127.0, 126.8, 123.6, 122.3, 117.1, 109.8, 106.2, 104.4, 102.9, 74.0, 55.6, 40.9, 37.8, 37.6, 36.0, 34.5, 31.6. IR (KBr)  $\nu$  2960, 2924, 1736, 1577, 1537, 1488, 1390, 1244, 908, 807, 732. HRMS (ESI)  $m/z$  Calcd. for  $\text{C}_{37}\text{H}_{43}\text{N}_8\text{O}_2^+ [\text{M}+\text{H}]^+$  631.3504; Found: 631.3507. HPLC: AD-H column, Hexane : *i*-PrOH = 80 : 20, 24 °C, 0.5 mL/min flow rate, detection at 315 nm,  $t_1 = 12.5$  min (minor),  $t_2 = 28.7$  min (major).  $[\alpha]_{\text{D}}^{25} = -26.5$  ( $c = 0.002$ ,  $\text{CH}_3\text{OH}$ ) for 93.0% *ee*.

**6<sup>5</sup>-(*tert*-butyl)-*N,N*,3,5,7-pentamethyl-6<sup>2</sup>-((3-methylbenzyl)oxy)-3,5,7-triaza-4(2,4)-triazina-1(2,6)-pyridina-2,6(1,3)-dibenzenacycloheptaphan-4<sup>6</sup>-amine (5g)**

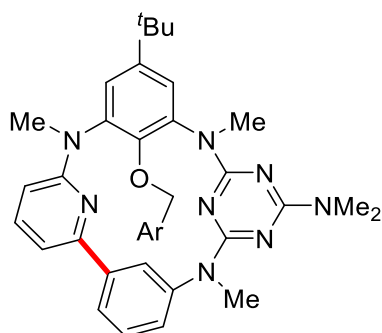

Ar = 3-Me-C<sub>6</sub>H<sub>4</sub>

Chemical Formula: C<sub>37</sub>H<sub>42</sub>N<sub>8</sub>O; Molecular Weight: 614.7980

20.6 mg, 67% yield, colorless oil.

$^1\text{H}$  NMR (400 MHz,  $\text{CDCl}_3$ )  $\delta$  8.88 (s, 1H), 7.55 (t,  $J = 8.0$  Hz, 1H), 7.22 (t,  $J = 8.0$  Hz, 1H), 7.15 (d,  $J = 7.6$  Hz, 1H), 7.06-7.04 (m, 2H), 7.02-7.00 (m, 2H), 6.94 (d,  $J = 7.2$  Hz, 2H), 6.83 (s, 1H), 6.79 (d,  $J = 7.2$  Hz, 1H), 6.51 (d,  $J = 8.4$  Hz, 1H), 4.89 (d,  $J = 12.0$  Hz, 1H), 4.79 (d,  $J = 12.0$  Hz, 1H), 3.60 (s, 3H), 3.40 (s, 3H), 3.39 (s, 3H), 3.19 (s, 6H), 2.16 (s, 3H), 1.24 (s, 9H).  $^{13}\text{C}$  NMR (100 MHz,  $\text{CDCl}_3$ )  $\delta$  166.48, 166.47, 165.4, 157.1, 156.9, 151.3, 146.5, 145.0, 141.1, 140.0, 138.9, 137.8, 137.7, 137.4, 127.8, 127.7, 127.6, 127.5, 124.3, 123.6, 123.5, 122.2, 119.7, 119.6, 109.9, 102.7, 73.9, 41.0, 38.0, 37.6, 36.0, 34.5, 31.6, 21.3. IR (KBr)  $\nu$  2955, 2926, 1570, 1535, 1489, 1377, 1244, 808,

778, 698. **HRMS** (ESI)  $m/z$  Calcd. for  $C_{37}H_{43}N_8O^+$   $[M+H]^+$  615.3554; Found: 615.3559.

**HPLC**: AD-H column, Hexane : *i*-PrOH = 80 : 20, 24 °C, 0.5 mL/min flow rate, detection at 254 nm,  $t_1$  = 10.2 min (minor),  $t_2$  = 23.6 min (major).  $[\alpha]_D^{25} = -24.4$  ( $c = 0.002$ ,  $CH_3OH$ ) for 89.7% *ee*.

**6<sup>5</sup>-(*tert*-butyl)-6<sup>2</sup>-((4-fluorobenzyl)oxy)-*N,N*,3,5,7-pentamethyl-3,5,7-triaza-4(2,4)-triazina-1(2,6)-pyridina-2,6(1,3)-dibenzenacycloheptaphan-4<sup>6</sup>-amine (5h)**

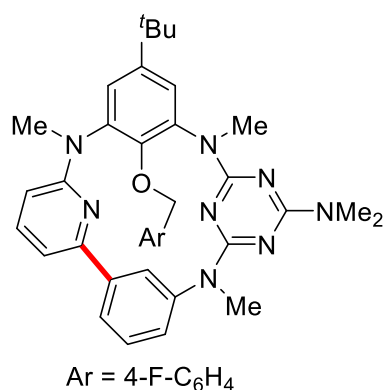

Chemical Formula:  $C_{36}H_{39}FN_8O$ ; Molecular Weight: 618.7614

20.7 mg, 67% yield, colorless oil.

**<sup>1</sup>H NMR** (400 MHz,  $CDCl_3$ )  $\delta$  8.88 (dd,  $J = 2.4$  Hz, 1.6 Hz, 1H), 7.55 (dd,  $J = 8.4$  Hz, 7.6 Hz, 1H), 7.23 (t,  $J = 8.0$  Hz, 1H), 7.17 (dt,  $J = 7.6$  Hz, 1.2 Hz, 1H), 7.06-7.04 (m, 1H), 7.05 (d,  $J = 2.4$  Hz, 1H), 7.00 (d,  $J = 2.4$  Hz, 1H), 6.96-6.93 (m, 3H), 6.82-6.77 (m, 2H), 6.50 (d,  $J = 8.4$  Hz, 1H), 4.88 (d,  $J = 12.4$  Hz, 1H), 4.79 (d,  $J = 12.0$  Hz, 1H), 3.60 (s, 3H), 3.38 (s, 6H), 3.19 (s, 6H), 1.24 (s, 9H). **<sup>13</sup>C NMR** (100 MHz,  $CDCl_3$ )  $\delta$  166.51, 166.49, 165.3, 161.9 (d,  $J = 243$  Hz), 157.1, 156.7, 151.1, 146.7, 145.0, 140.9, 140.0, 137.9, 137.4, 134.6 (d,  $J = 3$  Hz), 128.4 (d,  $J = 8$  Hz), 127.6, 123.9, 123.6, 122.2, 119.7, 119.4, 114.7 (d,  $J = 21$  Hz), 109.9, 102.8, 73.3, 40.9, 37.9, 37.6, 36.0, 34.5, 31.5. **IR** (KBr)  $\nu$  2920, 2850, 1571, 1532, 1487, 1376, 1140, 970, 808, 705. **HRMS** (ESI)  $m/z$  Calcd. for  $C_{36}H_{40}N_8FO^+$   $[M+H]^+$  619.3304; Found: 619.3306. **HPLC**: AD-H column, Hexane : *i*-PrOH = 80 : 20, 24 °C, 0.5 mL/min flow rate, detection at 260 nm,  $t_1$  = 9.4 min (minor),  $t_2$  = 21.6 min (major).  $[\alpha]_D^{25} = -25.2$  ( $c = 0.002$ ,  $CH_3OH$ ) for 85.0% *ee*.

**6<sup>5</sup>-(tert-butyl)-6<sup>2</sup>-methoxy-N,N,3,5,7-pentamethyl-3,5,7-triaza-4(2,4)-triazina-1(2,6)-pyridina-2,6(1,3)-dibenzenacycloheptaphan-4<sup>6</sup>-amine (5i)**

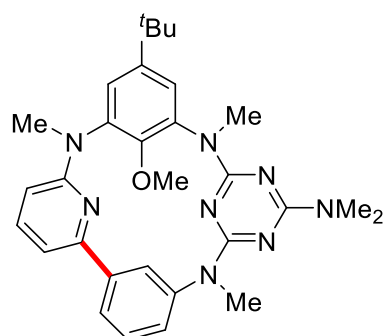

Chemical Formula: C<sub>30</sub>H<sub>36</sub>N<sub>8</sub>O; Molecular Weight: 524.6730

21.0 mg, 80% yield, white solid, M.P. = 226-227 °C

**<sup>1</sup>H NMR** (400 MHz, CDCl<sub>3</sub>) δ 8.13 (dd, *J* = 2.4 Hz, 1.6 Hz, 1H), 7.57 (dd, *J* = 8.0 Hz, 7.6 Hz, 1H), 7.22 (t, *J* = 7.6 Hz, 2H), 7.17 (dt, *J* = 7.6 Hz, 1.2 Hz, 1H), 7.06-7.03 (m, 1H), 7.03 (d, *J* = 2.4 Hz, 1H), 6.98 (d, *J* = 2.4 Hz, 1H), 6.95 (d, *J* = 7.6 Hz, 1H), 6.58 (d, *J* = 8.4 Hz, 1H), 3.63 (s, 3H), 3.59 (s, 3H), 3.48 (s, 3H), 3.46 (s, 3H), 3.20 (s, 6H), 1.23 (s, 9H). **<sup>13</sup>C NMR** (100 MHz, CDCl<sub>3</sub>) δ 166.47, 166.45, 165.4, 157.1, 156.7, 152.4, 146.2, 145.1, 140.8, 139.6, 137.9, 137.0, 127.5, 123.8, 123.7, 122.5, 119.7, 119.5, 109.8, 102.6, 60.4, 40.8, 38.0, 37.6, 36.0, 34.5, 31.5. **IR** (KBr) ν 2924, 2853, 1571, 1535, 1488, 1378, 1244, 1106, 808, 778. **HRMS** (APCI) *m/z* Calcd. for C<sub>30</sub>H<sub>37</sub>N<sub>8</sub>O<sup>+</sup> [M+H]<sup>+</sup> 525.3085; Found: 525.3098. **HPLC**: AD-H column, Hexane : *i*-PrOH = 80 : 20, 24 °C, 0.5 mL/min flow rate, detection at 254 nm, *t*<sub>1</sub> = 11.1 min (minor), *t*<sub>2</sub> = 27.1 min (major). [α]<sub>D</sub><sup>25</sup> = -27.3 (*c* = 0.002, CH<sub>3</sub>OH) for 92.0% *ee*.

**6<sup>5</sup>-(tert-butyl)-6<sup>2</sup>-ethoxy-N,N,3,5,7-pentamethyl-3,5,7-triaza-4(2,4)-triazina-1(2,6)-pyridina-2,6(1,3)-dibenzenacycloheptaphan-4<sup>6</sup>-amine (5j)**

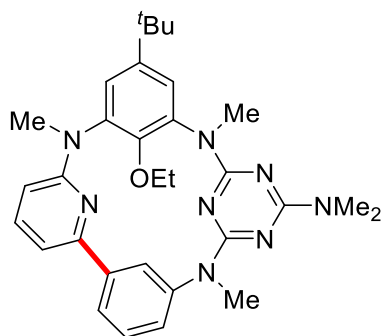

Chemical Formula: C<sub>31</sub>H<sub>38</sub>N<sub>8</sub>O; Molecular Weight: 538.7000

19.9 mg, 74% yield, colorless oil.

**<sup>1</sup>H NMR** (400 MHz, CDCl<sub>3</sub>) δ 8.85 (s, 1H), 7.56 (t, *J* = 8.0 Hz, 1H), 7.20 (t, *J* = 7.6 Hz, 1H), 7.16 (d, *J* = 7.6 Hz, 1H), 7.05-6.98 (m, 3H), 6.94 (d, *J* = 7.2 Hz, 1H), 6.56 (d, *J* = 8.4 Hz, 1H), 3.89 (dq, *J* = 12.0 Hz, 7.2 Hz, 1H), 3.79 (dq, *J* = 12.0 Hz, 7.2 Hz, 1H), 3.59 (s, 3H), 3.46 (s, 3H), 3.44 (s, 3H), 3.20 (s, 6H), 1.23 (s, 9H), 0.96 (t, *J* = 7.2 Hz, 3H). **<sup>13</sup>C NMR** (100 MHz, CDCl<sub>3</sub>) δ 166.6, 165.4, 157.2, 156.8, 151.4, 146.1, 145.1, 141.0, 139.9, 137.8, 137.4, 127.5, 123.8, 123.6, 122.4, 119.6, 119.2, 109.7, 102.6, 67.9, 40.7, 37.8, 37.7, 36.0, 34.5, 31.6, 16.1. **IR** (KBr) ν 2924, 2853, 1571, 1535, 1378, 1244, 1050, 807, 778, 701. **HRMS** (APCI) *m/z* Calcd. for C<sub>31</sub>H<sub>39</sub>N<sub>8</sub>O<sup>+</sup> [M+H]<sup>+</sup> 539.3241; Found: 539.3242. **HPLC**: AD-H column, Hexane : *i*-PrOH = 80 : 20, 24 °C, 0.5 mL/min flow rate, detection at 254 nm, *t*<sub>1</sub> = 8.9 min (minor), *t*<sub>2</sub> = 16.2 min (major). [α]<sub>D</sub><sup>25</sup> = -34.0 (*c* = 0.002, CH<sub>3</sub>OH) for 91.8% *ee*.

**6<sup>5</sup>-(tert-butyl)-6<sup>2</sup>-methoxy-*N,N*,2<sup>5</sup>,3,5,7-hexamethyl-3,5,7-triaza-4(2,4)-triazina-1(2,6)-pyridina-2,6(1,3)-dibenzenacycloheptaphan-4<sup>6</sup>-amine (5k)**

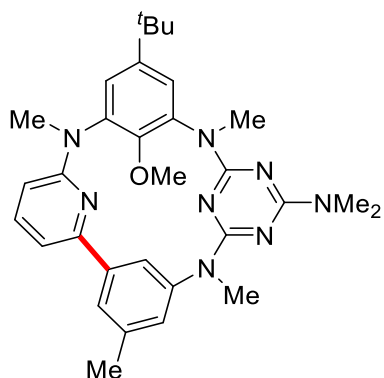

Chemical Formula: C<sub>31</sub>H<sub>38</sub>N<sub>8</sub>O; Molecular Weight: 538.7000

12 mg, 45% yield, colorless oil.

<sup>1</sup>H NMR (400 MHz, CDCl<sub>3</sub>) δ 8.58 (s, 1H), 7.56 (t, *J* = 8.0 Hz, 1H), 7.02 (d, *J* = 2.4 Hz, 1H), 6.98-6.97 (m, 2H), 6.93 (d, *J* = 7.6 Hz, 1H), 6.86 (s, 1H), 6.56 (d, *J* = 8.0 Hz, 1H), 3.63 (s, 3H), 3.58 (s, 3H), 3.47 (s, 3H), 3.45 (s, 3H), 3.20 (s, 6H), 2.32 (s, 3H), 1.22 (s, 9H). <sup>13</sup>C NMR (100 MHz, CDCl<sub>3</sub>) δ 166.6, 165.5, 157.3, 156.8, 152.5, 146.3, 145.2, 140.9, 139.7, 137.9, 137.1, 127.5, 123.9, 123.8, 122.6, 119.7, 119.5, 109.8, 102.7, 60.4, 40.7, 38.0, 37.7, 36.1, 34.5, 31.6. IR (KBr) ν 2924, 2854, 1573, 1514, 1459, 1367, 1173, 809, 786, 731. HRMS (APCI) *m/z* Calcd. for C<sub>31</sub>H<sub>39</sub>N<sub>8</sub>O<sup>+</sup> [M+H]<sup>+</sup> 539.3241; Found: 539.3240. HPLC: AD-H column, Hexane : *i*-PrOH = 80 : 20, 24 °C, 0.5 mL/min flow rate, detection at 310 nm, *t*<sub>1</sub> = 12.4 min (minor), *t*<sub>2</sub> = 24.1 min (major). [α]<sub>D</sub><sup>25</sup> = -22.0 (*c* = 0.002, CH<sub>3</sub>OH) for 92.0% *ee*.

**6<sup>5</sup>-(*tert*-butyl)-2<sup>5</sup>,6<sup>2</sup>-dimethoxy-*N,N*,3,5,7-pentamethyl-3,5,7-triaza-4(2,4)-triazina-1(2,6)-pyridina-2,6(1,3)-dibenzenacycloheptaphan-4<sup>6</sup>-amine (5l)**

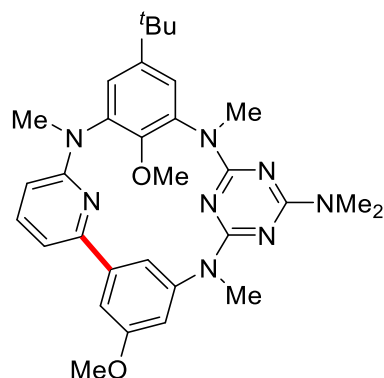

Chemical Formula: C<sub>31</sub>H<sub>38</sub>N<sub>8</sub>O<sub>2</sub>; Molecular Weight: 554.6990

16.6 mg, 60% yield, colorless oil.

<sup>1</sup>H NMR (400 MHz, CDCl<sub>3</sub>) δ 8.48 (s, 1H), 7.57 (t, *J* = 8.0 Hz, 1H), 7.03 (d, *J* = 2.4 Hz, 1H), 6.99 (d, *J* = 2.4 Hz, 1H), 6.93 (d, *J* = 7.6 Hz, 1H), 6.73 (s, 1H), 6.61 (t, *J* = 2.4 Hz, 1H), 6.58 (d, *J* = 8.0 Hz, 1H), 3.80 (s, 3H), 3.61 (s, 3H), 3.57 (s, 3H), 3.47 (s, 3H), 3.46 (s, 3H), 3.19 (s, 6H), 1.24 (s, 9H). <sup>13</sup>C NMR (100 MHz, CDCl<sub>3</sub>) δ 166.7, 166.4,

165.3, 159.2, 157.0, 156.7, 152.3, 146.3, 146.0, 141.6, 139.5, 137.9, 137.0, 123.7, 122.5, 116.8, 109.7, 106.3, 104.4, 102.8, 60.4, 55.5, 40.7, 37.8, 37.6, 36.0, 34.5, 31.6. **IR** (KBr)  $\nu$  2925, 2854, 1811, 1573, 1537, 1487, 1379, 1052, 808, 791, 733. **HRMS** (ESI)  $m/z$  Calcd. for  $C_{31}H_{39}N_8O_2^+ [M+H]^+$  555.3191; Found: 555.3196. **HPLC**: AD-H column, Hexane : *i*-PrOH = 80 : 20, 24 °C, 0.5 mL/min flow rate, detection at 319 nm,  $t_1$  = 13.7 min (minor),  $t_2$  = 31.9 min (major).  $[\alpha]_D^{25} = -20.8$  ( $c = 0.002$ , CH<sub>3</sub>OH) for 93.1% *ee*.

**6<sup>2</sup>-(benzyloxy)-6<sup>5</sup>-(*tert*-butyl)-*N,N*,3,5,7-pentamethyl-1<sup>5</sup>-nitro-3,5,7-triaza-4(2,4)-triazina-1(2,6)-pyridina-2,6(1,3)-dibenzenacycloheptaphan-4<sup>6</sup>-amine (5m)**

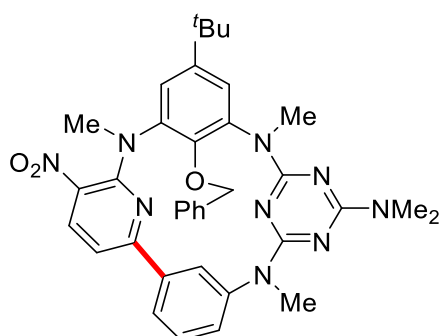

Chemical Formula:  $C_{36}H_{39}N_9O_3$ ; Molecular Weight: 645.7680

22.3 mg, 69% yield, yellow solid. M.P. = 235-236 °C

**<sup>1</sup>H NMR** (400 MHz, DMSO-*d*<sub>6</sub>)  $\delta$  8.47 (t,  $J = 1.6$  Hz, 1H), 8.29 (d,  $J = 8.0$  Hz, 1H), 7.34 (t,  $J = 8.0$  Hz, 1H), 7.30-7.29 (m, 2H), 7.21-7.18 (m, 1H), 7.19 (s, 1H), 7.17-7.16 (m, 2H), 7.16-7.14 (m, 2H), 7.05-7.03 (m, 2H), 5.06 (d,  $J = 11.6$  Hz, 1H), 4.76 (d,  $J = 11.6$  Hz, 1H), 3.50 (s, 3H), 3.37 (s, 3H), 3.31 (s, 3H), 3.14 (s, 6H), 1.25 (s, 9H). **<sup>13</sup>C NMR** (100 MHz, DMSO-*d*<sub>6</sub>)  $\delta$  165.53, 165.48, 164.6, 159.2, 149.8, 149.4, 147.0, 144.7, 139.1, 138.3, 137.7, 137.6, 136.2, 130.2, 128.5, 128.1, 127.6, 127.0, 123.6, 122.7, 121.9, 120.4, 119.7, 111.3, 74.0, 37.2, 35.6, 34.4, 31.2. **IR** (KBr)  $\nu$  2925, 1724, 1629, 1599, 1578, 1544, 1493, 1399, 1276, 1109, 977, 786. **HRMS** (ESI)  $m/z$  Calcd. for  $C_{36}H_{40}N_9O_3^+ [M+H]^+$  646.3249; Found: 646.3253. **HPLC**: AD-H column, Hexane : *i*-PrOH = 80 : 20, 24 °C, 0.5 mL/min flow rate, detection at 254 nm,  $t_1$  = 10.2 min (minor),  $t_2$  = 23.4 min (major).  $[\alpha]_D^{25} = -17.8$  ( $c = 0.002$ , CH<sub>3</sub>OH) for 58.9% *ee*.

**6<sup>2</sup>-(benzyloxy)-6<sup>5</sup>-(tert-butyl)-N<sup>4</sup>,N<sup>4</sup>,3,5,7-pentamethyl-3,5,7-triaza-4(2,4)-triazina-1(2,6)-pyridina-2,6(1,3)-dibenzenacycloheptaphane-1<sup>5</sup>,4<sup>6</sup>-diamine (5n)**

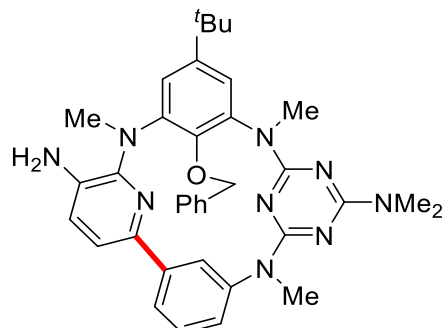

Chemical Formula: C<sub>36</sub>H<sub>41</sub>N<sub>9</sub>O; Molecular Weight: 615.7860

20.3 mg, 66% yield, colorless oil.

**<sup>1</sup>H NMR** (400 MHz, CDCl<sub>3</sub>) δ 9.05 (s, 1H), 7.23 (t, *J* = 8.0 Hz, 1H), 7.17-7.14 (m, 2H), 7.11-7.06 (m, 3H), 7.04 (d, *J* = 8.0 Hz, 1H), 6.98 (ddd, *J* = 8.4 Hz, 2.8 Hz, 0.8 Hz, 1H), 6.84 (d, *J* = 2.4 Hz, 1H), 6.80-6.77 (m, 3H), 4.90 (d, *J* = 12.0 Hz, 1H), 4.67 (d, *J* = 11.6 Hz, 1H), 3.52 (s, 3H), 3.35 (s, 3H), 3.29 (s, 3H), 3.16 (s, 6H), 1.30 (s, 9H). **<sup>13</sup>C NMR** (100 MHz, CDCl<sub>3</sub>) δ 167.4, 166.9, 165.2, 149.0, 147.5, 147.3, 146.4, 145.3, 141.9, 140.8, 138.7, 137.4, 132.6, 127.8, 126.9, 126.7, 123.9, 121.6, 120.6, 118.2, 117.2, 116.4, 115.9, 72.5, 39.5, 36.8, 36.0, 35.4, 34.8, 31.6. **IR** (KBr) ν 3359, 2921, 2851, 1659, 1633, 1573, 1514, 1394, 1367, 1249, 1173, 809, 786. **HRMS** (ESI) *m/z* Calcd. for C<sub>36</sub>H<sub>42</sub>N<sub>9</sub>O<sup>+</sup> [M+H]<sup>+</sup> 616.3507; Found: 616.3512. **HPLC**: AD-H column, Hexane : *i*-PrOH = 80 : 20, 24 °C, 0.5 mL/min flow rate, detection at 273 nm, *t*<sub>1</sub> = 9.9 min (minor), *t*<sub>2</sub> = 18.1 min (major). [α]<sub>D</sub><sup>25</sup> = -21.1 (*c* = 0.002, CH<sub>3</sub>OH) for 73.3% *ee*.

**3-allyl-6<sup>2</sup>-(benzyloxy)-6<sup>5</sup>-(tert-butyl)-N,N,5,7-tetramethyl-3,5,7-triaza-4(2,4)-triazina-1(2,6)-pyridina-2,6(1,3)-dibenzenacycloheptaphan-4<sup>6</sup>-amine (5o)**

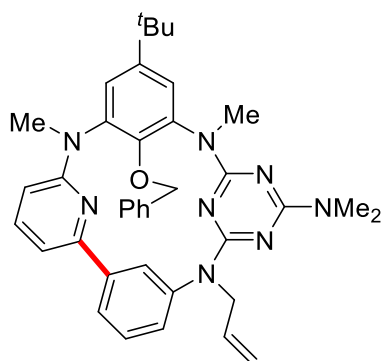

Chemical Formula: C<sub>38</sub>H<sub>42</sub>N<sub>8</sub>O; Molecular Weight: 626.8090

21.0 mg, 67% yield, colorless oil.

**<sup>1</sup>H NMR** (400 MHz, CDCl<sub>3</sub>)  $\delta$  8.79 (s, 1H), 7.54 (t, *J* = 8.0 Hz, 1H), 7.18 (t, *J* = 7.6 Hz, 1H), 7.14-7.12 (m, 5H), 7.06 (d, *J* = 2.4 Hz, 1H), 7.04-7.01 (m, 2H), 6.98 (d, *J* = 2.4 Hz, 1H), 6.91 (d, *J* = 7.2 Hz, 1H), 6.49 (d, *J* = 8.0 Hz, 1H), 6.10-6.00 (m, 1H), 5.24-5.18 (m, 2H), 5.12-5.09 (m, 1H), 4.92 (d, *J* = 12.4 Hz, 1H), 4.84 (d, *J* = 12.0 Hz, 1H), 4.33 (dd, *J* = 16.8 Hz, 4.8 Hz, 1H), 3.39 (s, 3H), 3.36 (s, 3H), 3.16 (s, 6H), 1.24 (s, 9H). **<sup>13</sup>C NMR** (100 MHz, CDCl<sub>3</sub>)  $\delta$  166.5, 165.7, 165.3, 157.1, 151.2, 146.5, 144.6, 141.3, 140.0, 138.9, 137.8, 137.5, 136.0, 128.0, 127.5, 127.0, 126.7, 125.0, 123.6, 122.0, 120.0, 119.9, 115.3, 110.0, 102.6, 74.1, 53.4, 41.3, 37.5, 36.0, 34.5, 31.5. **IR** (KBr)  $\nu$  2924, 2853, 1571, 1537, 1390, 1244, 1215, 1061, 807, 780, 697. **HRMS** (APCI) *m/z* Calcd. for C<sub>38</sub>H<sub>43</sub>N<sub>8</sub>O<sup>+</sup> [M+H]<sup>+</sup> 627.3554; Found: 627.3558. **HPLC**: AD-H column, Hexane : *i*-PrOH = 80 : 20, 24 °C, 0.5 mL/min flow rate, detection at 284 nm, *t*<sub>1</sub> = 9.9 min (minor), *t*<sub>2</sub> = 22.2 min (major). [ $\alpha$ ]<sub>D</sub><sup>25</sup> = -28.3 (*c* = 0.002, CH<sub>3</sub>OH) for 87.6% *ee*.

**6<sup>2</sup>-methoxy-*N,N*,6<sup>5</sup>,3,5,7-hexamethyl-3,5,7-triaza-4(2,4)-triazina-1(2,6)-pyridina-2,6(1,3)-dibenzenacycloheptaphan-4<sup>6</sup>-amine (5p)**

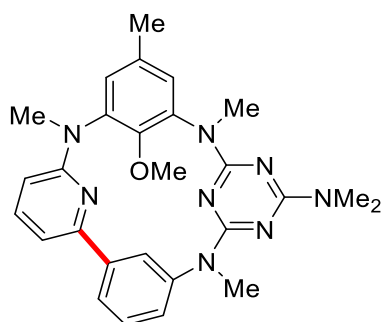



Chemical Formula: C<sub>27</sub>H<sub>30</sub>N<sub>8</sub>O; Molecular Weight: 482.5920

17.4 mg, 72% yield, white solid. M.P. = 232-234 °C

<sup>1</sup>H NMR (400 MHz, CDCl<sub>3</sub>) δ 8.80 (dd, *J* = 8.0 Hz, 1.6 Hz, 1H), 7.57 (dd, *J* = 8.4 Hz, 7.6 Hz, 1H), 7.21 (t, *J* = 7.6 Hz, 1H), 7.16 (dt, *J* = 7.6 Hz, 1.2 Hz, 1H), 7.02 (ddd, *J* = 7.6 Hz, 2.4 Hz, 1.2 Hz, 1H), 6.95 (d, *J* = 7.6 Hz, 1H), 6.87 (d, *J* = 2.4 Hz, 1H), 6.83 (d, *J* = 2.4 Hz, 1H), 6.58 (d, *J* = 8.4 Hz, 1H), 3.65 (s, 3H), 3.58 (s, 3H), 3.46 (s, 3H), 3.44 (s, 3H), 3.20 (s, 6H), 2.21 (s, 3H). <sup>13</sup>C NMR (100 MHz, CDCl<sub>3</sub>) δ 166.6, 166.5, 165.4, 157.4, 156.7, 152.7, 145.1, 140.8, 140.3, 138.0, 137.4, 133.2, 127.52, 127.47, 126.3, 123.2, 119.8, 119.3, 109.9, 102.8, 60.6, 40.2, 37.9, 37.5, 36.0, 20.8. IR (KBr) ν 2922, 2852, 1569, 1488, 1387, 1354, 1277, 805, 785, 699. HRMS (ESI) *m/z* Calcd. for C<sub>27</sub>H<sub>31</sub>N<sub>8</sub>O<sup>+</sup> [M+H]<sup>+</sup> 483.2615; Found: 483.2616. HPLC: AD-H column, Hexane : *i*-PrOH = 80 : 20, 24 °C, 0.5 mL/min flow rate, detection at 254 nm, *t*<sub>1</sub> = 33.6 min (minor), *t*<sub>2</sub> = 37.2 min (major). [α]<sub>D</sub><sup>25</sup> = -38.1 (*c* = 0.002, CH<sub>3</sub>OH) for 95.0% *ee*.

***N,N,6<sup>2</sup>,3,5,7*-hexamethyl-3,5,7-triaza-4(2,4)-triazina-1(2,6)-pyridina-2,6(1,3)-dibenzenacycloheptaphan-4<sup>6</sup>-amine (5q)**

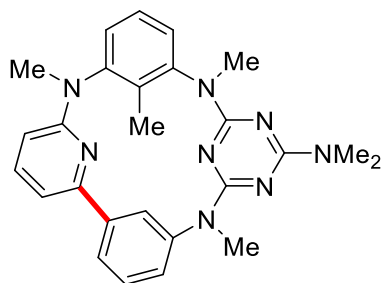

Chemical Formula: C<sub>26</sub>H<sub>28</sub>N<sub>8</sub>; Molecular Weight: 452.5660

13.1 mg, 58% yield, colorless oil.

<sup>1</sup>H NMR (400 MHz, CDCl<sub>3</sub>) δ 8.66 (s, 1H), 7.59 (t, *J* = 8.0 Hz, 1H), 7.21-7.16 (m, 3H), 7.06-7.02 (m, 1H), 7.05 (d, *J* = 8.4 Hz, 1H), 6.99 (d, *J* = 7.6 Hz, 1H), 6.97 (d, *J* = 7.6 Hz), 6.61 (d, *J* = 8.4 Hz, 1H), 3.60 (s, 3H), 3.48 (s, 3H), 3.45 (s, 3H), 3.22 (s, 6H), 2.12 (s, 3H). <sup>13</sup>C NMR (100 MHz, CDCl<sub>3</sub>) δ 166.6, 166.0, 165.4, 157.8, 156.3, 147.9, 145.1, 144.3, 140.5, 138.2, 137.6, 127.7, 127.2, 125.5, 124.0, 122.8, 119.9, 119.6, 109.3, 102.9,

39.2, 38.2, 37.4, 36.0, 13.7. **IR** (KBr)  $\nu$  2927, 1629, 1579, 1493, 1453, 1399, 1109, 978, 786, 696. **HRMS** (APCI)  $m/z$  Calcd. for  $C_{26}H_{29}N_8^+ [M+H]^+$  453.2510; Found: 453.2503. **HPLC**: AD-H column, Hexane : *i*-PrOH = 80 : 20, 24 °C, 0.5 mL/min flow rate, detection at 254 nm,  $t_1$  = 14.4 min (major),  $t_2$  = 18.1 min (minor).  $[\alpha]_D^{25} = +32.0$  ( $c = 0.002$ , CH<sub>3</sub>OH) for 81.6% *ee*.

**(R)**-(1-(6<sup>2</sup>-(benzyloxy)-6<sup>5</sup>-(tert-butyl)-3,5,7-trimethyl-3,5,7-triaza-4(2,4)-triazina-1(2,6)-pyridina-2,6(1,3)-dibenzenacycloheptaphane-4<sup>6</sup>-yl)pyrrolidin-2-yl)methanol (**5r**)

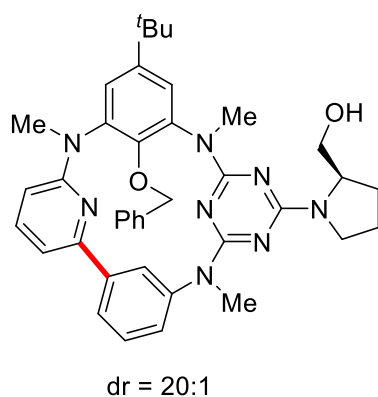

Chemical Formula: C<sub>39</sub>H<sub>44</sub>N<sub>8</sub>O<sub>2</sub>; Molecular Weight: 656.8350

13.5 mg, 41% yield, colorless oil.

**<sup>1</sup>H NMR** (400 MHz, CDCl<sub>3</sub>)  $\delta$  8.85 (s, 1H), 7.55 (t,  $J = 8.0$  Hz, 1H), 7.23 (d,  $J = 7.6$  Hz, 1H), 7.18 (d,  $J = 8.0$  Hz, 1H), 7.13 (s, 3H), 7.07-6.94 (m, 6H), 6.51 (d,  $J = 8.4$  Hz, 1H), 4.94 (d,  $J = 12.4$  Hz, 1H), 4.80 (d,  $J = 12.0$  Hz, 1H), 4.42-4.35 (m, 1H), 3.90-3.85 (m, 1H), 3.77-3.65 (m, 2H), 3.60-3.53 (m, 4H), 3.38-3.30 (m, 6H), 2.24-2.10 (m, 1H), 2.05-1.87 (m, 3H), 1.23 (s, 9H). **<sup>13</sup>C NMR** (100 MHz, DMSO-*d*<sub>6</sub>)  $\delta$  166.0, 165.4, 164.3, 159.1, 150.0, 147.5, 144.9, 139.8, 139.6, 139.0, 138.1, 132.3, 131.0, 129.6, 128.1, 126.4, 124.4, 115.6, 107.3, 84.2, 68.7, 63.5, 59.3, 47.2, 38.3, 37.2, 37.0, 34.7, 31.7, 28.4, 25.3, 23.5. **IR** (KBr)  $\nu$  2926, 1580, 1534, 1488, 1387, 1356, 1316, 1144, 971, 809, 772, 705. **HRMS** (ESI)  $m/z$  Calcd. for  $C_{39}H_{45}N_8O_2^+ [M+H]^+$  657.3660; Found: 657.3651.

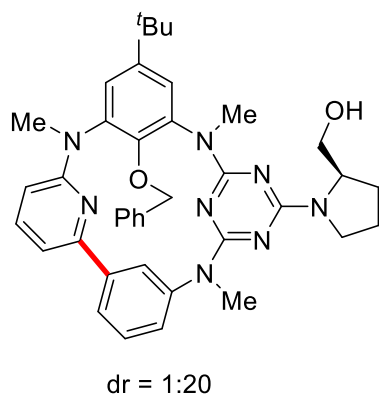

Chemical Formula: C<sub>39</sub>H<sub>44</sub>N<sub>8</sub>O<sub>2</sub>; Molecular Weight: 656.8350

14.0 mg, 50% yield, colorless oil.

**<sup>1</sup>H NMR** (400 MHz, CDCl<sub>3</sub>)  $\delta$  8.76 (s, 1H), 7.56 (dd,  $J$  = 8.0 Hz, 7.2 Hz, 1H), 7.23 (t,  $J$  = 7.6 Hz, 1H), 7.18-7.14 (m, 4H), 7.04-7.00 (m, 4H), 6.99 (d,  $J$  = 2.4 Hz, 1H), 6.94 (d,  $J$  = 7.2 Hz, 1H), 6.51 (d,  $J$  = 8.0 Hz, 1H), 4.98-4.84 (m, 2H), 4.46-4.40 (m, 1H), 3.93-3.86 (m, 1H), 3.77-3.67 (m, 2H), 3.60-3.53 (m, 4H), 3.39-3.36 (m, 6H), 2.30-2.14 (m, 1H), 2.14-2.11 (m, 1H), 1.96-1.85 (m, 2H), 1.23 (s, 9H). **<sup>13</sup>C NMR** (100 MHz, CDCl<sub>3</sub>)  $\delta$  166.0, 165.7, 165.6, 157.1, 156.6, 151.0, 147.0, 144.8, 141.1, 140.0, 138.0, 128.0, 127.7, 127.1, 126.7, 124.3, 123.4, 122.6, 120.2, 119.9, 110.0, 102.9, 76.8, 74.1, 69.4, 59.9, 47.9, 41.2, 38.2, 37.5, 34.6, 31.5, 29.8, 29.5, 24.1, 22.8. **IR** (KBr)  $\nu$  2926, 1580, 1534, 1488, 1387, 1356, 1316, 1144, 971, 809, 772, 705. **HRMS** (ESI)  $m/z$  Calcd. for C<sub>39</sub>H<sub>45</sub>N<sub>8</sub>O<sub>2</sub><sup>+</sup> [M+H]<sup>+</sup> 657.3660; Found: 657.3651.

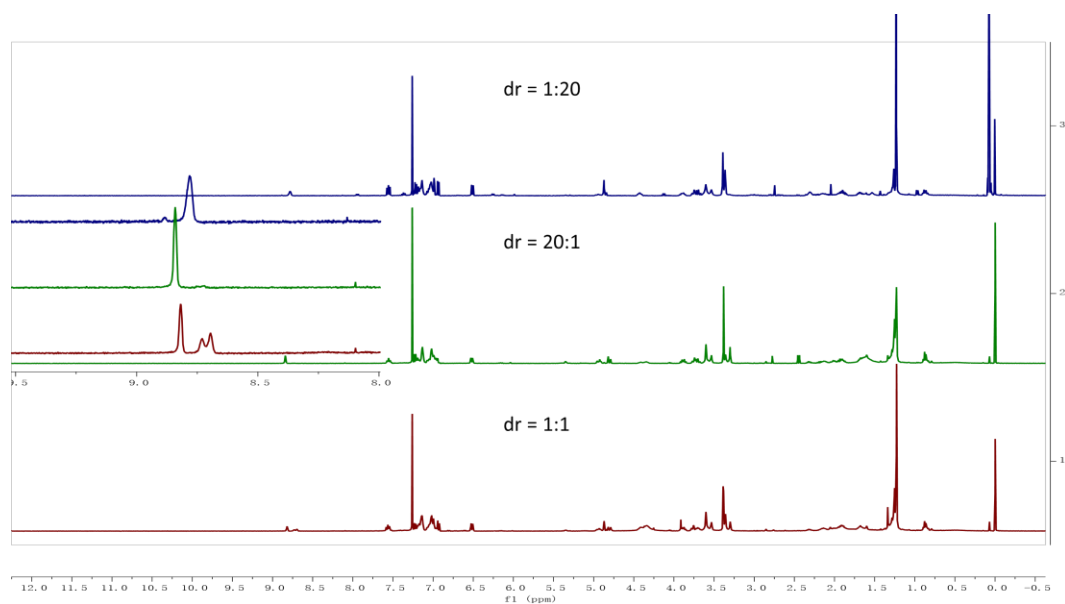

**<sup>1</sup>H NMR spectra of 5r (dr = 1:1, dr = 20:1, and dr = 1:20)**

**6<sup>2</sup>-methoxy-*N,N*,6<sup>5</sup>,3,5,7-hexamethyl-3,5,7-triaza-4(2,4)-triazina-1(2,6)-pyridina-2,6(1,3)-dibenzenacycloheptaphan-4<sup>6</sup>-amine (5s)**

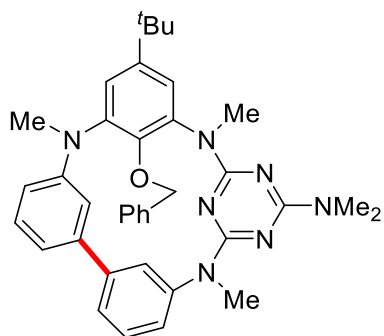

Chemical Formula: C<sub>37</sub>H<sub>41</sub>N<sub>7</sub>O; Molecular Weight: 599.7830

19.1 mg, 64% yield, colorless oil.

**<sup>1</sup>H NMR** (400 MHz, CDCl<sub>3</sub>) δ 8.35 (t, *J* = 1.6 Hz, 1H), 7.29 (t, *J* = 7.6 Hz, 1H), 7.23 (d, *J* = 7.6 Hz, 1H), 7.16-7.14 (m, 3H), 7.10-7.06 (m, 1H), 7.09 (d, *J* = 3.2 Hz, 1H), 7.07 (d, *J* = 2.4 Hz, 1H), 7.03-7.00 (m, 3H), 6.95 (d, *J* = 7.2 Hz, 1H), 6.77 (dd, *J* = 8.0 Hz, 2.8 Hz, 1H), 6.67 (dd, *J* = 2.4 Hz, 1.6 Hz, 1H), 4.97 (d, *J* = 12.0 Hz, 1H), 4.74 (d, *J* = 12.0 Hz, 1H), 3.62 (s, 3H), 3.44 (s, 3H), 3.32 (s, 3H), 3.20 (s, 6H), 1.25 (s, 9H). **<sup>13</sup>C**

**NMR** (100 MHz, CDCl<sub>3</sub>)  $\delta$  166.9, 166.6, 165.2, 150.0, 147.8, 146.8, 144.7, 142.5, 139.8, 138.4, 137.9, 128.9, 128.1, 127.9, 127.2, 127.1, 124.5, 124.0, 122.9, 119.9, 119.1, 118.5, 114.9, 109.5, 74.2, 41.9, 38.4, 37.7, 36.0, 34.6, 31.5, 31.1. **IR** (KBr)  $\nu$  2924, 2854, 1595, 1532, 1479, 1356, 1212, 1180, 799, 773. **HRMS** (APCI)  $m/z$  Calcd. for C<sub>37</sub>H<sub>42</sub>N<sub>7</sub>O<sup>+</sup> [M+H]<sup>+</sup> 600.3445; Found: 600.3443. **HPLC**: AD-H column, Hexane : *i*-PrOH = 80 : 20, 24 °C, 0.5 mL/min flow rate, detection at 254 nm,  $t_1$  = 9.4 min (major),  $t_2$  = 10.1 min (minor).  $[\alpha]_D^{25}$  = -9.3 ( $c$  = 0.002, CH<sub>3</sub>OH) for 19.1% *ee*.

**6<sup>2</sup>-methoxy-*N,N*,6<sup>5</sup>,3,5,7-hexamethyl-3,5,7-triaza-4(2,4)-triazina-1,2,6(1,3)-tribenzenacycloheptaphan-4<sup>6</sup>-amine (5t)**

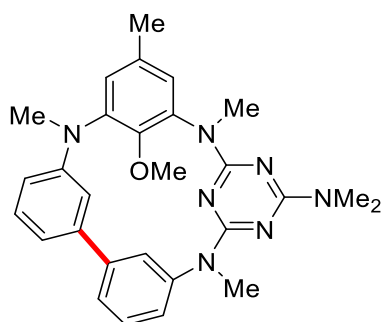

Chemical Formula: C<sub>28</sub>H<sub>31</sub>N<sub>7</sub>O; Molecular Weight: 481.6040

16.8 mg, 70% yield, colorless oil.

**<sup>1</sup>H NMR** (400 MHz, CDCl<sub>3</sub>)  $\delta$  8.23 (m, 1H), 7.30 (t,  $J$  = 7.6 Hz, 1H), 7.22 (t,  $J$  = 7.6 Hz, 1H), 7.04 (ddd,  $J$  = 7.6 Hz, 1.6 Hz, 0.8 Hz, 1H), 6.99 (ddd,  $J$  = 8.0 Hz, 2.4 Hz, 0.8 Hz, 1H), 6.94 (ddd,  $J$  = 7.6 Hz, 1.6 Hz, 0.8 Hz, 1H), 6.90-6.88 (m, 2H), 6.80 (dd,  $J$  = 8.0 Hz, 2.8 Hz, 1H), 6.48-6.47 (m, 1H), 3.67 (s, 3H), 3.61 (s, 3H), 3.45 (s, 3H), 3.42 (s, 3H), 3.20 (s, 6H), 2.22 (s, 3H), 1.25 (s, 9H). **<sup>13</sup>C NMR** (100 MHz, CDCl<sub>3</sub>)  $\delta$  166.9, 166.6, 165.2, 151.8, 147.3, 144.8, 142.5, 142.3, 140.0, 137.7, 134.4, 129.0, 128.1, 127.9, 127.1, 123.8, 120.0, 118.9, 118.6, 114.8, 109.6, 60.7, 41.0, 38.4, 37.6, 36.0, 20.8. **IR** (KBr)  $\nu$  2924, 2854, 1573, 1514, 1470, 1367, 1249, 1173, 809, 786. **HRMS** (ESI)  $m/z$  Calcd. for C<sub>28</sub>H<sub>32</sub>N<sub>7</sub>O<sup>+</sup> [M+H]<sup>+</sup> 482.2663; Found: 482.2660. **HPLC**: AD-H column, Hexane : *i*-PrOH = 80 : 20, 24 °C, 0.5 mL/min flow rate, detection at 288 nm,  $t_1$  = 14.6 min (minor),  $t_2$  = 17.4 min (major).  $[\alpha]_D^{25}$  = 0 ( $c$  = 0.002, CH<sub>3</sub>OH) for 0% *ee*.

**6<sup>2</sup>-(benzyloxy)-6<sup>5</sup>-(tert-butyl)-N,N,5,7-tetramethyl-3-oxa-5,7-diaza-4(2,4)-triazina-1(2,6)-pyridina-2,6(1,3)-dibenzenacycloheptaphan-4<sup>6</sup>-amine (5u)**

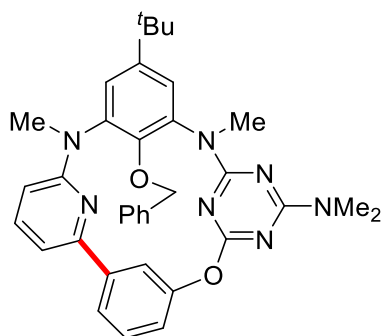

Chemical Formula: C<sub>35</sub>H<sub>37</sub>N<sub>7</sub>O<sub>2</sub>; Molecular Weight: 587.7280

20.9 mg, 71% yield, colorless oil.

**<sup>1</sup>H NMR** (400 MHz, CDCl<sub>3</sub>)  $\delta$  9.03 (dd,  $J$  = 2.8 Hz, 1.6 Hz, 1H), 7.57 (dd,  $J$  = 8.4 Hz, 7.6 Hz, 1H), 7.32 (dt,  $J$  = 7.2 Hz, 1.2 Hz, 1H), 7.22 (t,  $J$  = 8.0 Hz, 1H), 7.14-7.19 (m, 4H), 7.07 (s, 2H), 7.02 (d,  $J$  = 7.6 Hz, 1H), 6.98 (m, 2H), 6.52 (d,  $J$  = 8.4 Hz, 1H), 4.91 (d,  $J$  = 12.0 Hz, 1H), 4.80 (d,  $J$  = 12.4 Hz, 1H), 3.39 (s, 6H), 3.21 (s, 6H), 1.27 (s, 9H).

**<sup>13</sup>C NMR** (100 MHz, CDCl<sub>3</sub>)  $\delta$  169.5, 166.8, 166.7, 156.8, 155.6, 154.1, 150.8, 147.0, 141.6, 140.1, 138.5, 138.1, 137.0, 128.2, 128.1, 127.2, 126.7, 123.1, 123.0, 120.4, 119.4, 119.1, 109.7, 103.2, 74.1, 40.5, 37.9, 36.6, 34.6, 31.5. **IR** (KBr)  $\nu$  2922, 2852, 1569, 1488, 1387, 1354, 1277, 1071, 808, 768, 703. **HRMS** (ESI)  $m/z$  Calcd. for C<sub>35</sub>H<sub>38</sub>N<sub>7</sub>O<sub>2</sub><sup>+</sup> [M+H]<sup>+</sup> 588.3082; Found: 588.3090. **HPLC**: AD-H column, Hexane : *i*-PrOH = 80 : 20, 24 °C, 0.5 mL/min flow rate, detection at 254 nm,  $t_1$  = 10.2 min (minor),  $t_2$  = 21.6 min (major).  $[\alpha]_D^{25}$  = +12.3 ( $c$  = 0.002, CH<sub>3</sub>OH) for 80.0% *ee*.

**6<sup>5</sup>-(tert-butyl)-6<sup>2</sup>-ethoxy-N,N,5,7-tetramethyl-3-oxa-5,7-diaza-4(2,4)-triazina-1(2,6)-pyridina-2,6(1,3)-dibenzenacycloheptaphan-4<sup>6</sup>-amine (5v)**

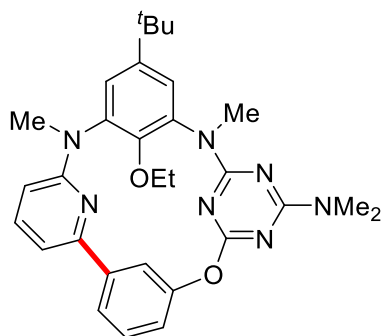

Chemical Formula: C<sub>30</sub>H<sub>35</sub>N<sub>7</sub>O<sub>2</sub>; Molecular Weight: 525.6570

17.9 mg, 68% yield, colorless oil.

**<sup>1</sup>H NMR** (400 MHz, CDCl<sub>3</sub>)  $\delta$  8.96 (s, 1H), 7.59 (t,  $J$  = 8.0 Hz, 1H), 7.31 (d,  $J$  = 7.6 Hz, 1H), 7.20 (t,  $J$  = 8.0 Hz, 1H), 7.10 (d,  $J$  = 8.0 Hz, 1H), 7.04 (s, 2H), 7.01 (d,  $J$  = 7.2 Hz, 1H), 6.57 (d,  $J$  = 8.4 Hz, 1H), 3.92-3.84 (m, 1H), 3.81-3.73 (m, 1H), 3.49 (s, 3H), 3.45 (s, 3H), 3.23 (s, 6H), 1.25 (s, 9H), 0.99 (t,  $J$  = 7.2 Hz, 3H). **<sup>13</sup>C NMR** (100 MHz, CDCl<sub>3</sub>)  $\delta$  169.5, 166.9, 166.7, 156.8, 155.7, 154.2, 151.0, 146.4, 141.6, 139.8, 138.0, 136.8, 128.1, 123.1, 120.3, 119.4, 119.1, 109.4, 103.0, 68.0, 40.4, 38.0, 36.6, 34.5, 31.6, 16.1. **IR** (KBr)  $\nu$  2954, 2924, 2853, 1736, 1537, 1390, 1147, 982, 807, 780. **HRMS** (ESI)  $m/z$  Calcd. for C<sub>30</sub>H<sub>36</sub>N<sub>7</sub>O<sub>2</sub><sup>+</sup> [M+H]<sup>+</sup> 526.2925; Found: 526.2918. **HPLC**: AD-H column, Hexane : *i*-PrOH = 80 : 20, 24 °C, 0.5 mL/min flow rate, detection at 254 nm,  $t_1$  = 12.3 min (minor),  $t_2$  = 25.6 min (major).  $[\alpha]_D^{25}$  = +19.9 ( $c$  = 0.002, CH<sub>3</sub>OH) for 85.0% *ee*.

**6<sup>5</sup>-(*tert*-butyl)-6<sup>2</sup>-methoxy-*N,N*,5,7-tetramethyl-3-oxa-5,7-diaza-4(2,4)-triazina-1(2,6)-pyridina-2,6(1,3)-dibenzenacycloheptaphan-4<sup>6</sup>-amine (5w)**

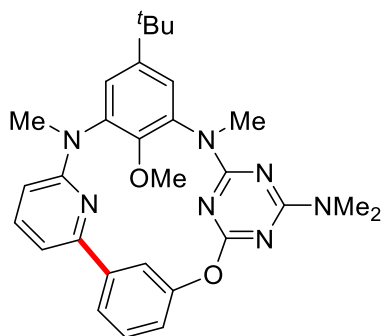

Chemical Formula: C<sub>29</sub>H<sub>33</sub>N<sub>7</sub>O<sub>2</sub>; Molecular Weight: 511.6300

23.0 mg, 90% yield, white solid. M.P. = 225-227 °C

<sup>1</sup>H NMR (400 MHz, CDCl<sub>3</sub>) δ 8.93 (d, 1H), 7.60 (t, *J* = 8.0 Hz, 1H), 7.32 (d, *J* = 7.6 Hz, 1H), 7.20 (t, *J* = 8.0 Hz, 1H), 7.09 (dd, *J* = 8.0 Hz, 2.0 Hz, 1H), 7.05 (s, 2H), 7.02 (d, *J* = 7.2 Hz, 1H), 6.59 (d, *J* = 8.4 Hz, 1H), 3.64 (s, 3H), 3.51 (s, 3H), 3.47 (s, 3H), 3.23 (s, 6H), 1.25 (s, 9H). <sup>13</sup>C NMR (100 MHz, CDCl<sub>3</sub>) δ 169.6, 166.9, 166.7, 156.9, 155.6, 154.2, 152.0, 146.7, 141.4, 139.5, 138.2, 136.5, 128.2, 123.4, 120.4, 119.2, 119.2, 109.5, 103.1, 60.4, 40.3, 37.9, 36.6, 34.5, 31.5. IR (KBr) ν 2924, 2854, 1736, 1573, 1514, 1367, 1251, 1173, 809, 786, 731. HRMS (APCI) *m/z* Calcd. for C<sub>29</sub>H<sub>34</sub>N<sub>7</sub>O<sub>2</sub><sup>+</sup> [M+H]<sup>+</sup> 512.2769; Found: 512.2779. HPLC: AD-H column, Hexane : *i*-PrOH = 80 : 20, 24 °C, 0.5 mL/min flow rate, detection at 254 nm, t<sub>1</sub> = 10.5 min (minor), t<sub>2</sub> = 21.6 min (major). [α]<sub>D</sub><sup>25</sup> = +22.5 (*c* = 0.002, CH<sub>3</sub>OH) for 91.0% *ee*.

**6<sup>2</sup>-methoxy-*N,N*,6<sup>5</sup>,5,7-pentamethyl-3-oxa-5,7-diaza-4(2,4)-triazina-1(2,6)-pyridina-2,6(1,3)-dibenzenacycloheptaphan-4<sup>6</sup>-amine (5x)**

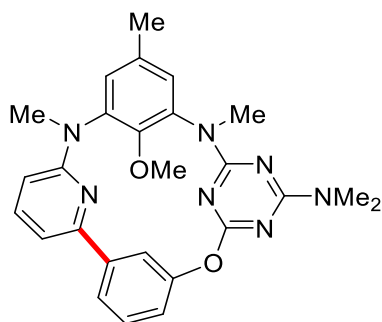

Chemical Formula: C<sub>26</sub>H<sub>27</sub>N<sub>7</sub>O<sub>2</sub>; Molecular Weight: 469.5490

22.1 mg, 94% yield, white solid. M.P. = 221-222 °C

<sup>1</sup>H NMR (400 MHz, CDCl<sub>3</sub>) δ 8.87 (m, 1H), 7.59 (t, *J* = 8.0 Hz, 1H), 7.30 (d, *J* = 7.6 Hz, 1H), 7.19 (t, *J* = 7.6 Hz, 1H), 7.02 (ddd, *J* = 1.2 Hz, 2.4 Hz, 8.4 Hz, 1H), 7.02 (d, *J* = 7.2 Hz, 1H), 6.89 (s, 2H), 6.59 (d, *J* = 8.4 Hz, 1H), 3.66 (s, 3H), 3.50 (s, 3H), 3.44 (s, 3H), 3.23 (m, 6H), 2.23 (s, 3H). <sup>13</sup>C NMR (100 MHz, CDCl<sub>3</sub>) δ 169.6, 166.9, 166.7, 157.1, 155.6, 154.2, 152.3, 141.4, 140.2, 138.2, 136.9, 133.6, 128.3, 127.2, 127.1, 120.5, 119.3, 118.8, 109.6, 103.2, 60.6, 39.9, 37.8, 36.6, 20.9. IR (KBr) ν 2922, 2852, 1569,



1519, 1488, 1387, 1354, 1277, 992, 805, 785. **HRMS** (ESI)  $m/z$  Calcd. for  $C_{26}H_{28}N_7O_2^+$   $[M+H]^+$  470.2299; Found: 470.2296. **HPLC**: AD-H column, Hexane : *i*-PrOH = 80 : 20, 24 °C, 0.5 mL/min flow rate, detection at 326 nm,  $t_1$  = 20.3 min (minor),  $t_2$  = 33.8 min (major).  $[\alpha]_D^{25}$  = +9.7 ( $c$  = 0.001,  $CH_3OH$ ) for 89.2% *ee*.

**2<sup>4</sup>,6<sup>2</sup>-dimethoxy-*N,N*,6<sup>5</sup>,5,7-pentamethyl-3-oxa-5,7-diaza-4(2,4)-triazina-1(2,6)-pyridina-2,6(1,3)-dibenzenacycloheptaphan-4<sup>6</sup>-amine (5y)**

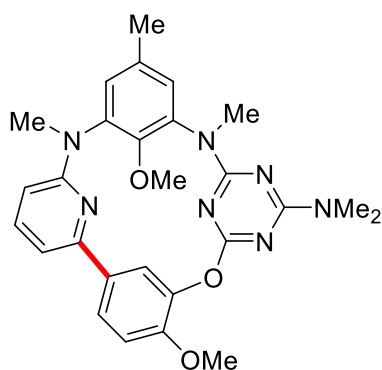

Chemical Formula:  $C_{27}H_{29}N_7O_3$ ; Molecular Weight: 499.5750

15.0 mg, 60% yield, white solid. M.P. = 230-231 °C

**<sup>1</sup>H NMR** (400 MHz,  $CDCl_3$ )  $\delta$  8.90 (d,  $J$  = 2.0 Hz, 1H), 7.56 (t,  $J$  = 8.0 Hz, 1H), 7.27-7.25 (m, 1H), 6.97 (d,  $J$  = 7.2 Hz, 1H), 6.88 (d,  $J$  = 5.2 Hz, 2H), 7.02 (d,  $J$  = 8.4 Hz, 1H), 6.54 (d,  $J$  = 8.4 Hz, 1H), 3.85 (s, 3H), 3.65 (s, 3H), 3.49 (s, 3H), 3.43 (s, 3H), 3.22 (s, 6H), 2.24 (s, 3H). **<sup>13</sup>C NMR** (100 MHz,  $CDCl_3$ )  $\delta$  169.6, 166.9, 166.8, 157.1, 155.6, 152.4, 149.8, 143.2, 140.3, 138.1, 136.9, 133.5, 133.1, 127.2, 127.1, 120.4, 119.5, 110.5, 109.0, 102.4, 60.6, 56.0, 39.9, 37.8, 36.5, 25.0, 20.9. **IR** (KBr)  $\nu$  2964, 2925, 1712, 1574, 1514, 1395, 1368, 1246, 1162, 952, 816, 787. **HRMS** (ESI)  $m/z$  Calcd. for  $C_{27}H_{30}N_7O_3^+$   $[M+H]^+$  500.2405; Found: 500.2413. **HPLC**: AD-H column, Hexane : *i*-PrOH = 75 : 25, 24 °C, 0.5 mL/min flow rate, detection at 254 nm,  $t_1$  = 11.5 min (minor),  $t_2$  = 12.9 min (major).  $[\alpha]_D^{25}$  = +4.6 ( $c$  = 0.002,  $CH_3OH$ ) for 94.7% *ee*.

**Methyl 4<sup>6</sup>-(dimethylamino)-6<sup>2</sup>-methoxy-6<sup>5</sup>,5,7-trimethyl-3-oxa-5,7-diaza-4(2,4)-triazina-1(2,6)-pyridina-2,6(1,3)-dibenzenacycloheptaphane-2<sup>4</sup>-carboxylate (5z)**

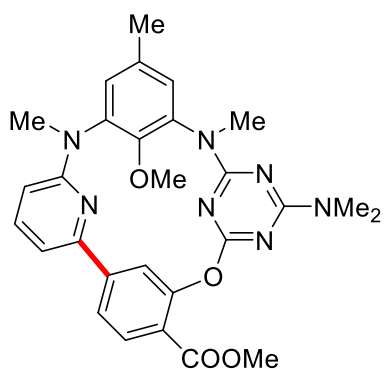

Chemical Formula: C<sub>28</sub>H<sub>29</sub>N<sub>7</sub>O<sub>4</sub>; Molecular Weight: 527.5850

21.9 mg, 83% yield, white solid. M.P. = 230-231 °C

**<sup>1</sup>H NMR** (400 MHz, CDCl<sub>3</sub>) δ 8.80 (s, 1H), 7.57 (t, *J* = 8.0 Hz, 1H), 7.76 (d, *J* = 8.0 Hz, 1H), 7.61 (t, *J* = 8.0 Hz, 1H), 7.28 (s, 1H), 7.02 (d, *J* = 7.2 Hz, 1H), 6.88 (d, *J* = 17.6 Hz, 2H), 6.63 (d, *J* = 8.0 Hz, 1H), 3.88 (s, 3H), 3.64 (s, 3H), 3.49 (s, 3H), 3.44 (s, 3H), 3.23 (s, 6H), 2.24 (s, 3H). **<sup>13</sup>C NMR** (100 MHz, CDCl<sub>3</sub>) δ 169.2, 167.0, 166.7, 166.5, 157.1, 154.9, 152.9, 152.3, 145.4, 140.0, 138.3, 137.0, 133.7, 131.0, 127.2, 126.9, 120.8, 120.1, 120.0, 110.1, 103.9, 60.7, 52.2, 40.2, 37.7, 36.6, 25.0, 20.9. **IR** (KBr)  $\nu$  2922, 2852, 1731, 1574, 1493, 1396, 1345, 1246, 1095, 806, 779. **HRMS** (ESI) *m/z* Calcd. for C<sub>28</sub>H<sub>30</sub>N<sub>7</sub>O<sub>4</sub><sup>+</sup> [M+H]<sup>+</sup> 528.2354; Found: 528.2352. **HPLC**: AD-H column, Hexane : *i*-PrOH = 80 : 20, 24 °C, 0.5 mL/min flow rate, detection at 254 nm, *t*<sub>1</sub> = 12.3 min (minor), *t*<sub>2</sub> = 17.3 min (major). [ $\alpha$ ]<sub>D</sub><sup>25</sup> = +20.0 (*c* = 0.002, CH<sub>3</sub>OH) for 94.9% *ee*.

**2<sup>5</sup>-chloro-6<sup>2</sup>-methoxy-*N,N*,6<sup>5</sup>,5,7-pentamethyl-3-oxa-5,7-diaza-4(2,4)-triazina-1(2,6)-pyridina-2,6(1,3)-dibenzenacycloheptaphan-4<sup>6</sup>-amine (5aa)**

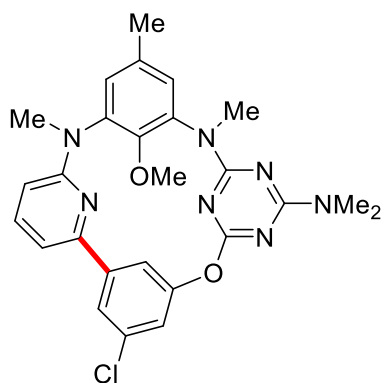

Chemical Formula: C<sub>26</sub>H<sub>26</sub>N<sub>7</sub>O<sub>2</sub>Cl; Molecular Weight: 503.9910

16.6 mg, 66% yield, colorless oil.

**<sup>1</sup>H NMR** (400 MHz, CDCl<sub>3</sub>) δ 8.77 (dd, *J* = 1.2 Hz, 2.4 Hz, 1H), 7.60 (dd, *J* = 7.4 Hz, 8.4 Hz, 1H), 7.27 (dd, *J* = 1.6 Hz, 1.2 Hz, 1H), 7.08 (dd, *J* = 2.4 Hz, 3.2 Hz, 1H), 6.98 (d, *J* = 7.2 Hz, 1H), 6.89 (s, 2H), 6.62 (d, *J* = 8.0 Hz, 1H), 3.64 (s, 3H), 3.49 (s, 3H), 3.45 (s, 3H), 3.24-3.20 (m, 6H), 2.24 (s, 3H). **<sup>13</sup>C NMR** (100 MHz, CDCl<sub>3</sub>) δ 169.4, 166.8, 166.6, 157.0, 154.5, 154.3, 152.2, 142.7, 140.0, 138.4, 136.8, 133.8, 133.3, 127.2, 127.1, 120.7, 119.3, 117.3, 109.6, 103.8, 60.7, 40.0, 37.8, 36.6, 20.9. **IR** (KBr) ν 2925, 2854, 1574, 1505, 1395, 1347, 1250, 1061, 855, 808, 790. **HRMS** (ESI) *m/z* Calcd. for C<sub>26</sub>H<sub>27</sub>N<sub>7</sub>O<sub>2</sub>Cl<sup>+</sup> [M+H]<sup>+</sup> 504.1909; Found: 504.1916. **HPLC**: AD-H column, Hexane : *i*-PrOH = 80 : 20, 24 °C, 0.5 mL/min flow rate, detection at 315 nm, *t*<sub>1</sub> = 11.5 min (minor), *t*<sub>2</sub> = 22.3 min (major). [α]<sub>D</sub><sup>25</sup> = -7.4 (*c* = 0.002, CH<sub>3</sub>OH) for 89.7% *ee*.

**6<sup>2</sup>-(benzyloxy)-6<sup>5</sup>-(*tert*-butyl)-1<sup>6</sup>,4<sup>6</sup>-dimethoxy-5,7-dimethyl-3-oxa-5,7-diaza-1,4(2,4)-ditriazina-2,6(1,3)-dibenzenacycloheptaphane (5ab)**

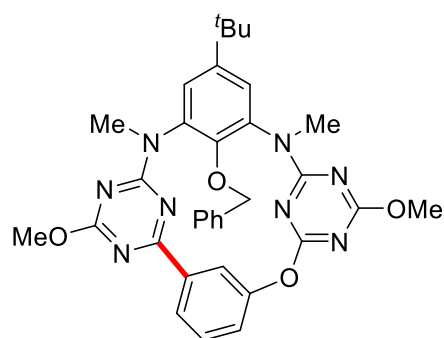

Chemical Formula: C<sub>33</sub>H<sub>34</sub>N<sub>8</sub>O<sub>4</sub>; Molecular Weight: 606.6870

13.1 mg, 54% yield, colorless oil.

**<sup>1</sup>H NMR** (400 MHz, CDCl<sub>3</sub>) δ 9.55 (s, 1H), 7.87 (d, *J* = 7.2 Hz, 1H), 7.34-7.29 (m, 2H), 7.19-7.17 (m, 4H), 7.13-7.12 (m, 1H), 7.02 (br, s, 2H), 4.86 (s, 2H), 4.07 (s, 3H), 4.05 (s, 3H), 3.53 (s, 3H), 3.41 (s, 3H), 1.29 (s, 9H). **<sup>13</sup>C NMR** (100 MHz, CDCl<sub>3</sub>) δ 207.3, 173.1, 172.0, 168.2, 152.9, 149.7, 148.3, 137.5, 137.0, 129.8, 128.5, 127.7, 126.4, 125.8, 119.4, 116.9, 73.9, 55.0, 37.0, 34.4, 31.4, 31.1. **IR** (KBr) ν 2923, 2853, 1573, 1492, 1395, 1299, 1055, 807. **HRMS** (ESI) *m/z* Calcd. for C<sub>33</sub>H<sub>35</sub>N<sub>8</sub>O<sub>4</sub><sup>+</sup> [M+H]<sup>+</sup>

607.2776; Found: 607.2767. **HPLC**: IB-N5 column, Hexane : *i*-PrOH = 80 : 20, 24 °C, 0.5 mL/min flow rate, detection at 264 nm,  $t_1 = 13.8$  min (minor),  $t_2 = 18.3$  min (major).  $[\alpha]_D^{25} = -6.2$  ( $c = 0.002$ , CH<sub>3</sub>OH) for 65.7% *ee*.

**6<sup>2</sup>-methoxy-*N,N*,3-trimethyl-5,7-dioxa-3-aza-4(2,4)-triazina-1(2,6)-pyridina-2,6(1,3)-dibenzenacycloheptaphan-4<sup>6</sup>-amine (5ac)**

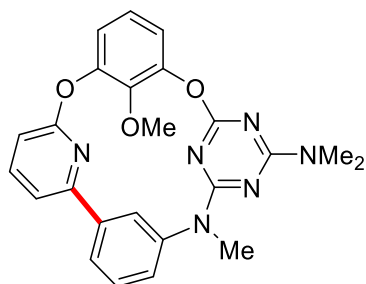

Chemical Formula: C<sub>24</sub>H<sub>22</sub>N<sub>6</sub>O<sub>3</sub>; Molecular Weight: 442.4790

6.6 mg, 59% yield, colorless oil.

**<sup>1</sup>H NMR** (400 MHz, CDCl<sub>3</sub>)  $\delta$  8.67 (dd,  $J = 2.0$  Hz, 1.6 Hz, 1H), 7.71 (t,  $J = 8.0$  Hz, 1H), 7.27 (t,  $J = 8.0$  Hz, 1H), 7.25-7.21 (m, 2H), 7.11 (ddd,  $J = 8.0$  Hz, 2.4 Hz, 1.2 Hz, 1H), 7.05 (dd,  $J = 8.0$  Hz, 2.0 Hz, 1H), 6.99-6.92 (m, 2H), 6.90 (dd,  $J = 8.0$  Hz, 2.0 Hz, 1H), 3.83 (s, 3H), 3.64 (s, 3H), 3.24 (s, 6H). **<sup>13</sup>C NMR** (100 MHz, CDCl<sub>3</sub>)  $\delta$  170.7, 166.8, 166.5, 161.9, 156.1, 148.0, 147.3, 145.1, 144.3, 139.8, 139.8, 128.0, 125.0, 123.1, 120.8, 120.8, 120.7, 120.6, 114.2, 107.5, 77.5, 77.2, 76.8, 61.0, 38.6, 36.7, 36.6. **IR** (KBr)  $\nu$  2926, 2854, 1588, 1488, 1356, 1292, 1072, 808. **HRMS** (ESI)  $m/z$  Calcd. for C<sub>24</sub>H<sub>23</sub>N<sub>6</sub>O<sub>3</sub><sup>+</sup> [M+H]<sup>+</sup> 443.1826; Found: 443.1827. **HPLC**: AD-H column, Hexane : *i*-PrOH = 80 : 20, 24 °C, 0.5 mL/min flow rate, detection at 284 nm,  $t_1 = 11.8$  min (major),  $t_2 = 14.7$  min (minor).  $[\alpha]_D^{25} = -12.0$  ( $c = 0.002$ , CH<sub>3</sub>OH) for 64.2% *ee*.

***N,N*,6<sup>5</sup>,3,5,7-hexamethyl-3,5,7-triaza-4(2,4)-triazina-1(2,6)-pyridina-2,6(1,3)-dibenzenacycloheptaphan-4<sup>6</sup>-amine (5ad)**

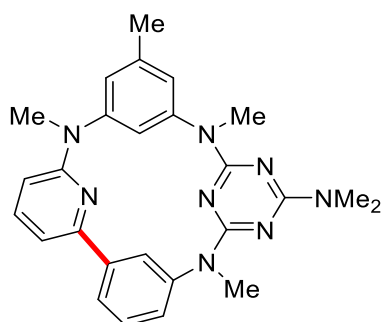

Chemical Formula: C<sub>26</sub>H<sub>28</sub>N<sub>8</sub>; Molecular Weight: 452.2437

49% yield, colorless oil.

**<sup>1</sup>H NMR** (400 MHz, CDCl<sub>3</sub>) δ 8.93 (dd, *J* = 1.6 Hz, 2.8 Hz, 1H), 7.58 (dd, *J* = 8.4 Hz, 7.6 Hz, 1H), 7.35 (t, *J* = 2.8 Hz, 1H), 7.22 (d, *J* = 7.6 Hz, 1H), 7.18 (dt, *J* = 1.6 Hz, 7.6 Hz, 1H), 7.03 (ddd, *J* = 1.2 Hz, 2.4 Hz, 7.6 Hz, 1H), 7.00 (d, *J* = 7.6 Hz, 1H), 6.80 (d, *J* = 6.0 Hz, 1H), 6.58 (d, *J* = 8.4 Hz, 1H), 3.58 (s, 3H), 3.46 (s, 3H), 3.43 (s, 3H), 3.19 (s, 6H), 2.28 (s, 3H). **<sup>13</sup>C NMR** (100 MHz, CDCl<sub>3</sub>) δ 166.9, 166.1, 165.3, 157.8, 156.2, 147.3, 145.0, 144.6, 140.6, 139.6, 138.3, 128.0, 127.8, 124.4, 122.9, 122.3, 119.6, 118.9, 110.0, 103.4, 40.6, 37.9, 37.8, 36.0, 21.5. **IR** (KBr) ν 2962, 2920, 1582, 1533, 1482, 1382, 1241, 1144, 972, 808, 705. **HRMS** (ESI) *m/z* Calcd. For C<sub>26</sub>H<sub>28</sub>N<sub>8</sub><sup>+</sup> [M+H]<sup>+</sup> 453.2492; Found: 453.2488.

## 9. Inversion barrier test

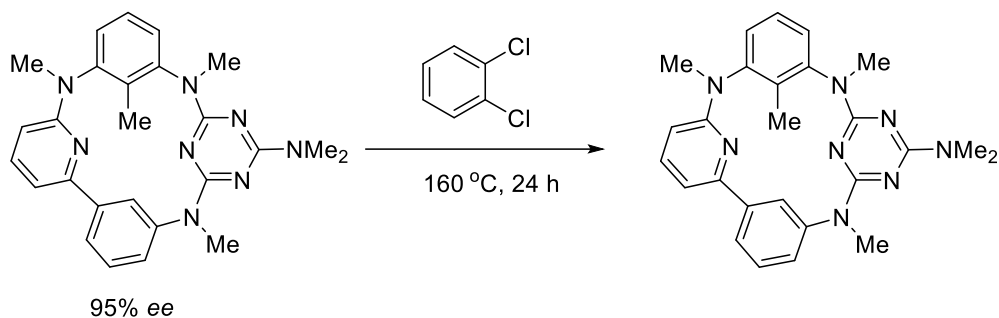

To a sealed tube was added **5q** (1 mg, 95% *ee*) and *o*-dichlorobenzene (5 mL). The mixture was heated to 160 °C for 24 h. The mixture was cooled to room temperature and measured the *ee* value.

0 h

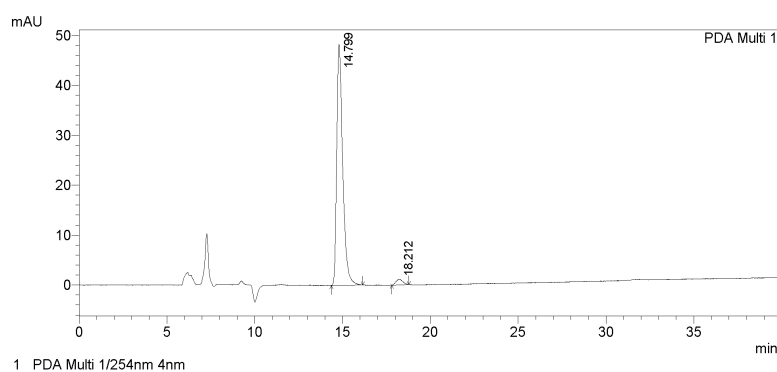

| PeakTable |           |         |        |         |          |
|-----------|-----------|---------|--------|---------|----------|
| Peak#     | Ret. Time | Area    | Height | Area %  | Height % |
| 1         | 14.799    | 1142944 | 48255  | 97.318  | 97.648   |
| 2         | 18.212    | 31501   | 1162   | 2.682   | 2.352    |
| Total     |           | 1174446 | 49417  | 100.000 | 100.000  |

24 h

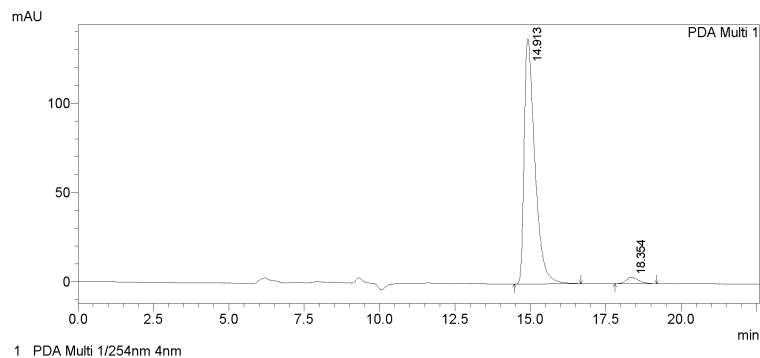

| PeakTable |           |         |        |         |          |
|-----------|-----------|---------|--------|---------|----------|
| Peak#     | Ret. Time | Area    | Height | Area %  | Height % |
| 1         | 14.913    | 3390956 | 137342 | 97.051  | 97.501   |
| 2         | 18.354    | 103032  | 3520   | 2.949   | 2.499    |
| Total     |           | 3493989 | 140863 | 100.000 | 100.000  |

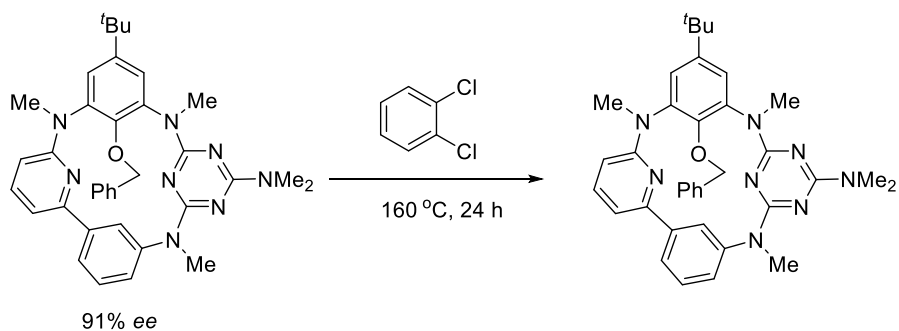

To a sealed tube was added **5a** (1 mg, 91% *ee*) and *o*-dichlorobenzene (5 mL). The mixture was heated to 160 °C for 24 h. The mixture was cooled to room temperature and measured the *ee* value.

0 h

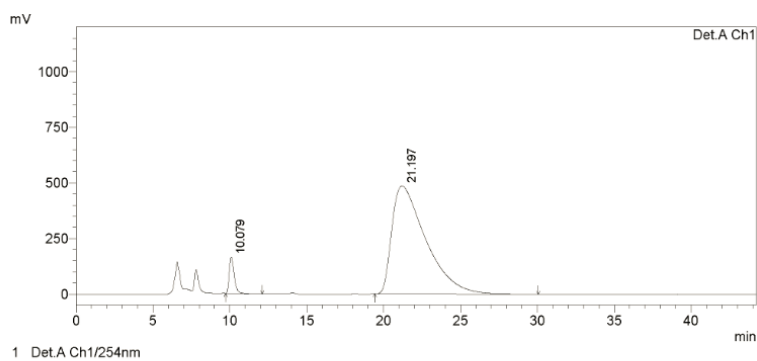

PeakTable

| Peak# | Ret. Time | Area     | Height | Area %  | Height % |
|-------|-----------|----------|--------|---------|----------|
| 1     | 10.079    | 3693747  | 164070 | 4.710   | 25.252   |
| 2     | 21.197    | 74730408 | 485652 | 95.290  | 74.748   |
| Total |           | 78424155 | 649722 | 100.000 | 100.000  |

24 h

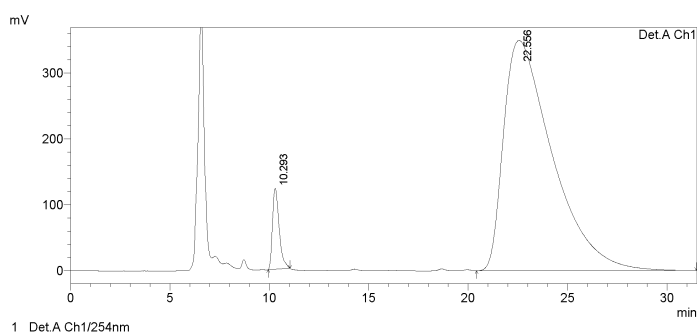

PeakTable

| Peak# | Ret. Time | Area     | Height | Area %  | Height % |
|-------|-----------|----------|--------|---------|----------|
| 1     | 10.293    | 2879207  | 122755 | 4.612   | 25.989   |
| 2     | 22.556    | 59551841 | 349573 | 95.388  | 74.011   |
| Total |           | 62431048 | 472329 | 100.000 | 100.000  |

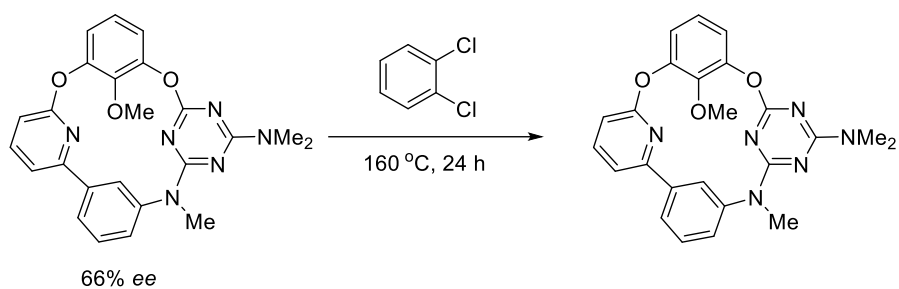

To a sealed tube was added **5ac** (1 mg, 66% *ee*) and *o*-dichlorobenzene (5 mL). The mixture was heated to 160 °C for 24 h. The mixture was cooled to room temperature and measured the *ee* value.

0 h

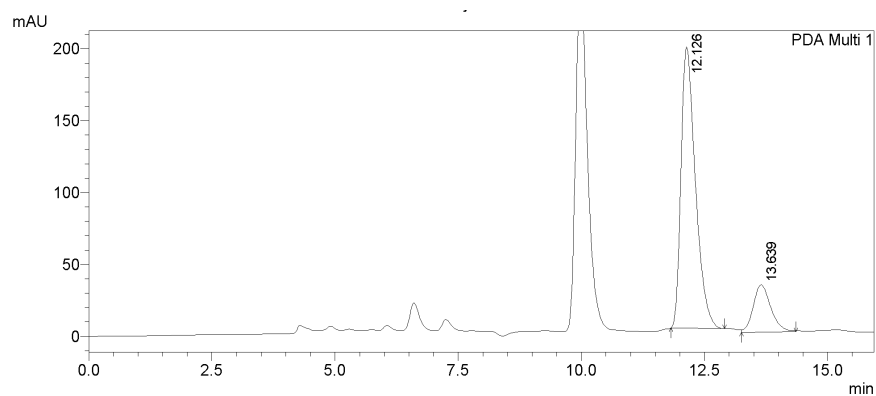

1 PDA Multi 1/254nm 4nm

PeakTable

| Peak# | Ret. Time | Area    | Height | Area %  | Height % |
|-------|-----------|---------|--------|---------|----------|
| 1     | 12.126    | 3985575 | 195540 | 82.902  | 85.543   |
| 2     | 13.639    | 821977  | 33046  | 17.098  | 14.457   |
| Total |           | 4807552 | 228586 | 100.000 | 100.000  |

24 h

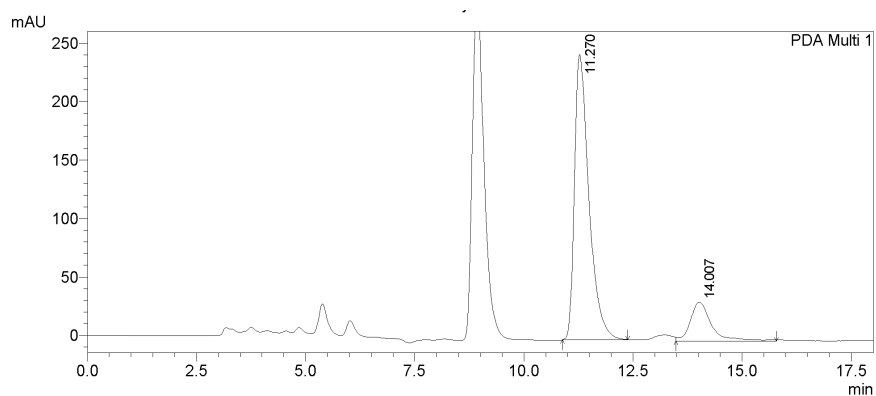

1 PDA Multi 1/254nm 4nm

PeakTable

| Peak# | Ret. Time | Area    | Height | Area %  | Height % |
|-------|-----------|---------|--------|---------|----------|
| 1     | 11.270    | 5628979 | 243958 | 83.032  | 87.939   |
| 2     | 14.007    | 1150286 | 33458  | 16.968  | 12.061   |
| Total |           | 6779265 | 277416 | 100.000 | 100.000  |



## 10. Synthesis and measurement of kinetics of racemization of enantiomers **5ae**

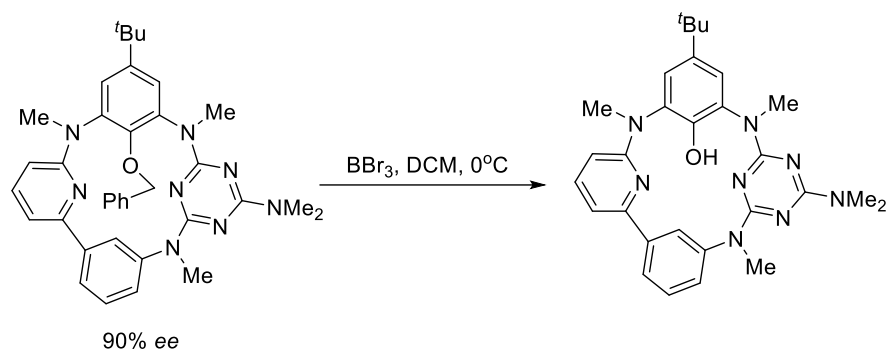

**Debenzylation reaction:** Under argon atmosphere, to a mixture of **5a** (60 mg, 0.1 mmol, *ee* = 90%) in dry DCM (10 mL) was slowly added BBr<sub>3</sub> (0.1 mL) at 0 °C. The reaction mixture was stirred at 0 °C for 5 h. The reaction was quenched with H<sub>2</sub>O, and extracted with EtOAc, washed with brine, and dried over anhydrous Na<sub>2</sub>SO<sub>4</sub>. After solvent evaporation, the residue was chromatographed with a silica gel column (PE/EtOAc = 3:1) to afford **5ae**, which was totally racemized during the reaction and purification.

**6<sup>5</sup>-(tert-butyl)-4<sup>6</sup>-(dimethylamino)-3,5,7-trimethyl-3,5,7-triaza-4(2,4)-triazina-1(2,6)-pyridina-2,6(1,3)-dibenzenacycloheptaphan-6<sup>2</sup>-ol (**5ae**)**

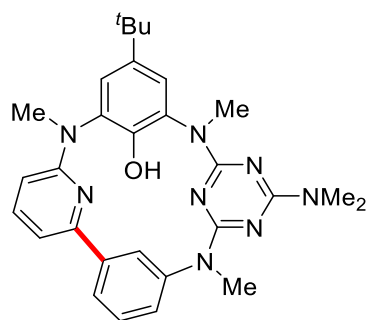

Chemical Formula: C<sub>29</sub>H<sub>34</sub>N<sub>8</sub>O; Molecular Weight: 510.6460

8.8 mg, 40% yield, colorless oil.

**<sup>1</sup>H NMR** (400 MHz, CDCl<sub>3</sub>)  $\delta$  8.94 (t, *J* = 1.6 Hz, 1H), 7.67 (dd, *J* = 8.0 Hz, 7.6 Hz, 1H), 7.30-7.24 (m, 2H), 7.15 (d, *J* = 7.6 Hz, 1H), 7.09 (ddd, *J* = 7.6 Hz, 2.4 Hz, 1.2 Hz, 1H), 7.07 (d, *J* = 2.4 Hz, 1H), 6.99 (d, *J* = 2.0 Hz, 1H), 6.68 (d, *J* = 8.0 Hz, 1H), 3.55 (s, 3H), 3.52 (s, 3H), 3.45 (s, 3H), 3.21 (s, 6H), 1.25 (s, 9H). **<sup>13</sup>C NMR** (100 MHz,

CDCl<sub>3</sub>)  $\delta$  167.4, 166.2, 165.2, 157.4, 156.1, 147.4, 145.7, 143.2, 139.3, 138.8, 137.9, 134.0, 128.0, 122.6, 122.1, 119.9, 119.6, 109.9, 104.4, 40.9, 38.3, 36.0, 34.4, 31.6. **IR** (KBr)  $\nu$  2926, 2854, 1588, 1488, 1356, 1292, 1072, 808. **HRMS** (APCI)  $m/z$  Calcd. for C<sub>29</sub>H<sub>35</sub>N<sub>8</sub>O<sup>+</sup> [M+H]<sup>+</sup> 511.2928; Found: 511.2934. **HPLC**: IBN5 column, hexane: CH<sub>2</sub>Cl<sub>2</sub>: *i*-PrOH: = 80 : 15 : 5, 24 °C, 0.4 mL/min flow rate, detection at 254 nm,  $t_1$  = 12.6 min,  $t_2$  = 13.7 min.

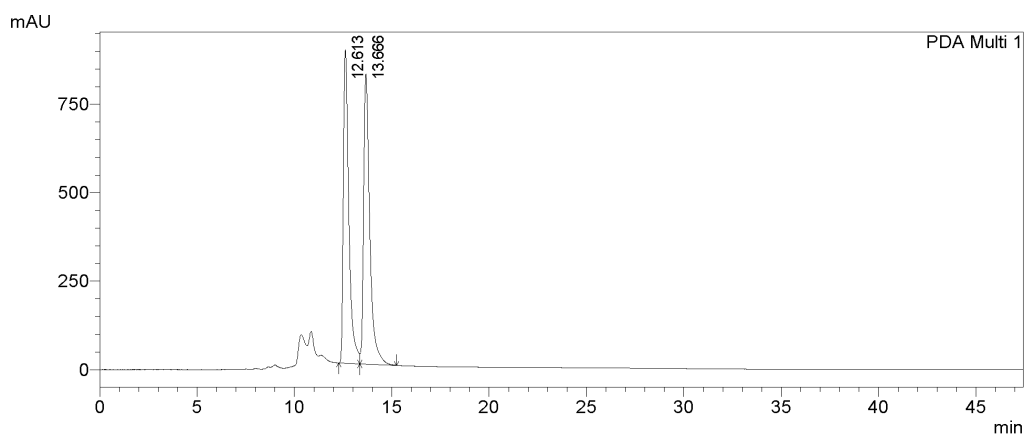

1 PDA Multi 1/254nm 4nm

PeakTable

PDA Ch1 254nm 4nm

| Peak# | Ret. Time | Area     | Height  | Area %  | Height % |
|-------|-----------|----------|---------|---------|----------|
| 1     | 12.613    | 17448915 | 885643  | 49.067  | 51.936   |
| 2     | 13.666    | 18112555 | 819621  | 50.933  | 48.064   |
| Total |           | 35561470 | 1705264 | 100.000 | 100.000  |

**Figure S1.** HPLC analysis of ( $\pm$ ) **5ae**. (chiral column, IBN5; mobile phase, hexane: CH<sub>2</sub>Cl<sub>2</sub>: *i*-PrOH: = 80 : 15 : 5, 24 °C, flow rate, 0.4 mL/min).

Enantioenriched **5ae** was obtained by resolution of racemic **5ae** by chiral HPLC under the conditions described in Figure S1.

## 10.1 Measurement of the racemization barrier of **5ae** for in CH<sub>3</sub>CN at different temperatures

Measurement of kinetics of the racemization barrier of **5ae** was carried out according to literature method.<sup>2</sup>

A solution of **5ae** (89.0% ee, resolved by chiral HPLC, 1.0 g/L) was kept in the range of 288 K-308 K. At a specific temperature, a very small amount of sample was pipetted at different time intervals and enantiomeric excess value ( $ee_t$ ) was analyzed by chiral HPLC analysis. Plot of  $\ln(ee_0/ee_t)$  against time gave a straight line, and a rate constant ( $k$ ) for racemization was obtained from the slope. After measuring rate constants at different temperature, the Eyring plot of  $\ln(k/T)$  against  $1/T$  gave enthalpy ( $\Delta H^\ddagger$ ) and entropy ( $\Delta S^\ddagger$ ) of activation for racemization.

| 308K  |                  | 305.5K |                  | 303K  |                  | 300.5K |                  | 298K  |                  |
|-------|------------------|--------|------------------|-------|------------------|--------|------------------|-------|------------------|
| t/s   | $\ln(ee_0/ee_t)$ | t/s    | $\ln(ee_0/ee_t)$ | t/s   | $\ln(ee_0/ee_t)$ | t/s    | $\ln(ee_0/ee_t)$ | t/s   | $\ln(ee_0/ee_t)$ |
| 0     | 0                | 0      | 0                | 0     | 0                | 0      | 0                | 0     | 0                |
| 1740  | 0.058351         | 1800   | 0.042358         | 1980  | 0.03102          | 2400   | 0.02601          | 4080  | 0.0305           |
| 3300  | 0.107176         | 3960   | 0.091013         | 4320  | 0.068823         | 4680   | 0.052            | 7980  | 0.060132         |
| 6660  | 0.210861         | 7200   | 0.162012         | 7860  | 0.124673         | 8460   | 0.09305          | 11880 | 0.08685          |
| 8280  | 0.273394         | 10800  | 0.25134          | 10020 | 0.16138          | 11280  | 0.1212           | 14880 | 0.11508          |
| 10140 | 0.314563         | 14400  | 0.3018           | 13080 | 0.20114          | 16080  | 0.18052          | 19920 | 0.17103          |

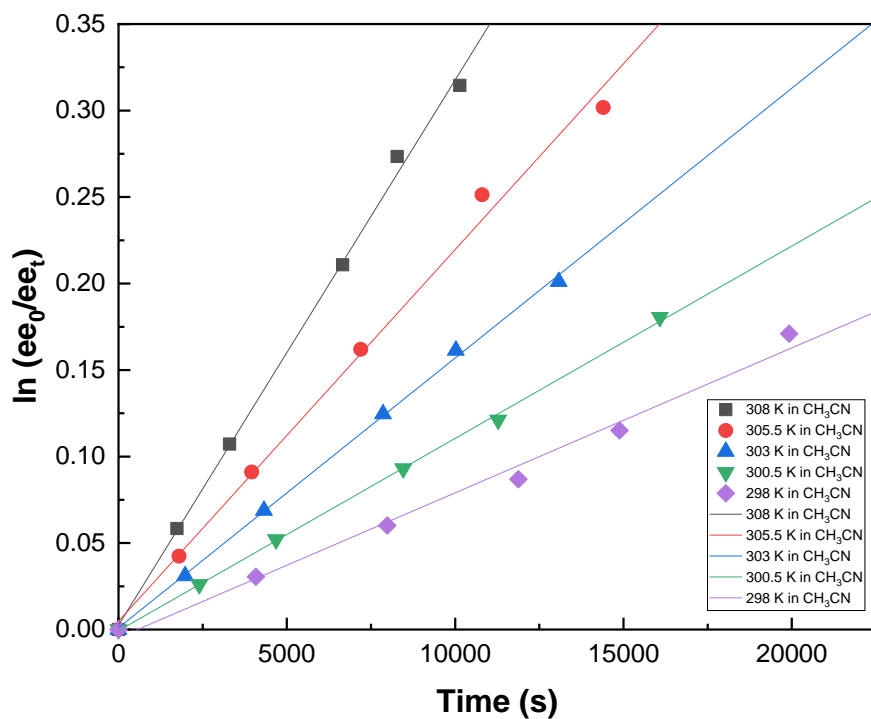

**Figure S2.** Rate equations for racemic reaction at 308 K, 305.5 K, 303 K, 300.5 K, 298 K in CH<sub>3</sub>CN.

$$\text{Equation: } \ln(ee_0/ee_t) = 2kt.$$

| T (K)                        | 308     | 305.5   | 303     | 300.5   | 298     |
|------------------------------|---------|---------|---------|---------|---------|
| $k$ ( $10^{-5}$ , $s^{-1}$ ) | 1.57549 | 1.07419 | 0.77978 | 0.55594 | 0.41887 |
| R <sup>2</sup>               | 0.998   | 0.994   | 0.998   | 0.999   | 0.989   |

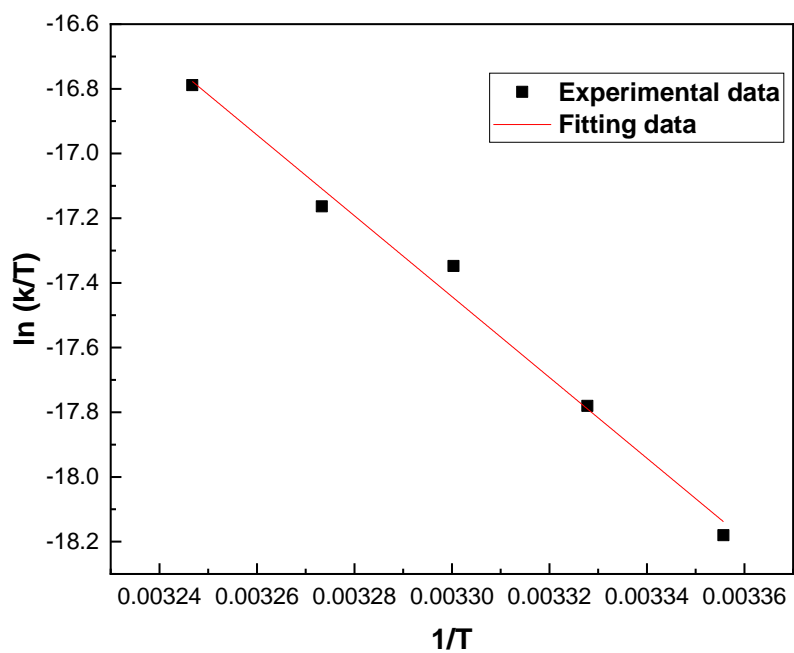

**Figure S3.** Eyring plot analysis and rate constant data for the enantiomerization of **5ae** in the CH<sub>3</sub>CN. Errors in  $\Delta H^\ddagger$  and  $\Delta S^\ddagger$  are expressed as 95% confidence limits.

$$\text{Eyring equation: } \ln \frac{k}{T} = -\frac{\Delta H^\ddagger}{RT} + \frac{\Delta S^\ddagger}{R} + \ln \frac{k_B}{h}$$

$$\text{Slope} = -12493.75034; \text{ Intercept} = 23.8871, R^2 = 0.987$$

$$\Delta H^\ddagger = 24.83 \pm 1.61 \text{ kcal mol}^{-1}, \Delta S^\ddagger = 1.0 \pm 5.33 \text{ cal mol}^{-1} \text{ K}^{-1}$$

## 10.2 Measurement of the racemization barrier of 5ae for in *i*PrOH at different temperatures

| 308K  |                                       | 303K  |                                       | 298K  |                                       | 293K  |                                       | 288K   |                                       |
|-------|---------------------------------------|-------|---------------------------------------|-------|---------------------------------------|-------|---------------------------------------|--------|---------------------------------------|
| t/s   | ln(ee <sub>0</sub> /ee <sub>t</sub> ) | t/s    | ln(ee <sub>0</sub> /ee <sub>t</sub> ) |
| 0     | 0                                     | 0     | 0                                     | 0     | 0                                     | 0     | 0                                     | 0      | 0                                     |
| 2520  | 0.26848                               | 1800  | 0.09979                               | 4080  | 0.15043                               | 1800  | 0.03694                               | 100800 | 0.59884                               |
| 4920  | 0.52193                               | 3960  | 0.20378                               | 7980  | 0.24574                               | 4440  | 0.04495                               | 117480 | 0.77319                               |
| 6720  | 0.68898                               | 7200  | 0.45119                               | 11880 | 0.31985                               | 10800 | 0.158                                 | 168540 | 1.10966                               |
| 8520  | 0.94681                               | 10800 | 0.64409                               | 14880 | 0.56241                               | 22200 | 0.36772                               | 181740 | 1.25276                               |
| 10560 | 1.11976                               | 14400 | 0.96788                               | 19920 | 0.73304                               | 28920 | 0.39999                               | 198600 | 1.36898                               |
| 12420 | 1.33767                               | 18000 | 1.16203                               | 24180 | 0.88332                               | 77040 | 1.10966                               | 205380 | 1.37102                               |

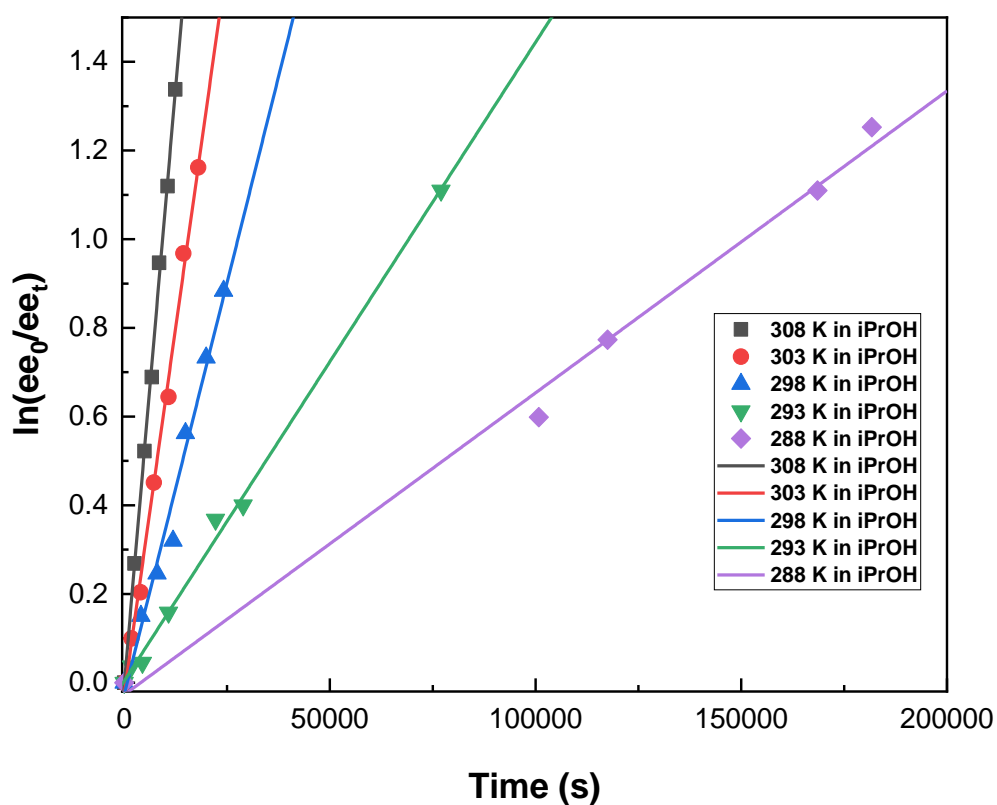

**Figure S4.** Rate equations for racemic reaction at 308 K, 303 K, 298 K, 293 K, 288 K in *i*PrOH.

$$\text{Equation: } \ln(ee_0/ee_t) = 2kt.$$

|                              |        |        |        |        |        |
|------------------------------|--------|--------|--------|--------|--------|
| T (K)                        | 308    | 303    | 298    | 293    | 288    |
| $k$ ( $10^{-5}$ , $s^{-1}$ ) | 5.3873 | 3.3063 | 1.8562 | 0.7203 | 0.3404 |
| $R^2$                        | 0.998  | 0.995  | 0.979  | 0.997  | 0.993  |

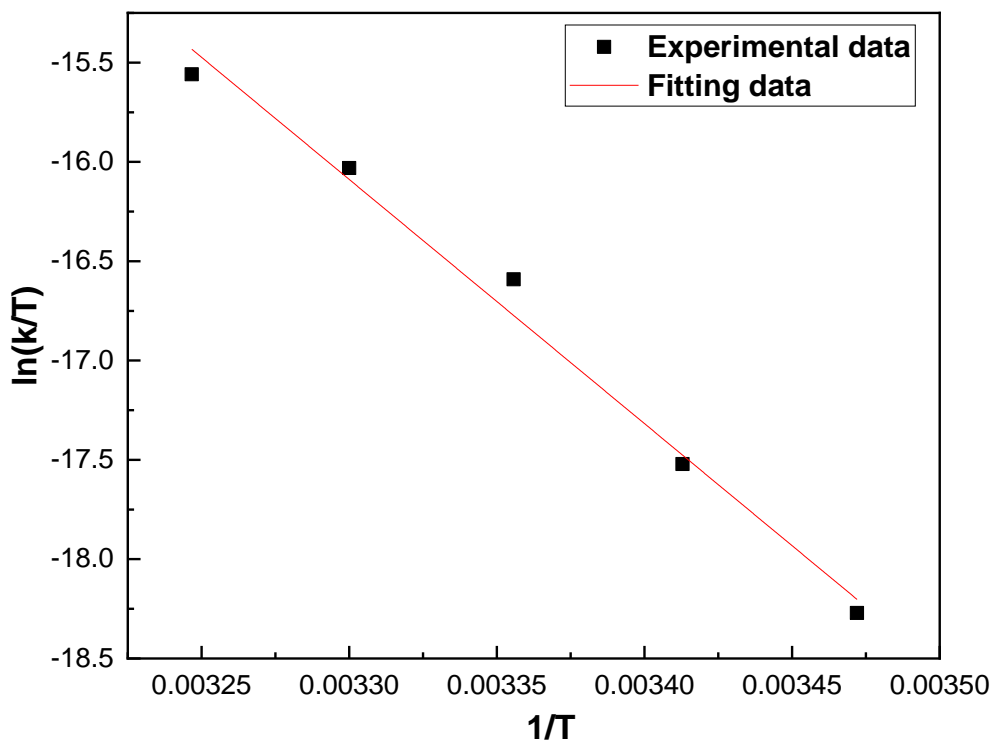

**Figure S5.** Eyring plot analysis and rate constant data for the enantiomerization of **5ae** in the *i*PrOH. Errors in  $\Delta H^\ddagger$  and  $\Delta S^\ddagger$  are expressed as 95% confidence limits.

$$\text{Eyring equation: } \ln \frac{k}{T} = -\frac{\Delta H^\ddagger}{RT} + \frac{\Delta S^\ddagger}{R} + \ln \frac{k_B}{h}$$

$$\text{Slope} = -12291.57093; \text{Intercept} = 24.47384, R^2 = 0.9879$$

$$\Delta H^\ddagger = 24.42 \pm 1.36 \text{ kcal mol}^{-1}, \Delta S^\ddagger = 1.42 \pm 5.24 \text{ cal mol}^{-1} \text{ K}^{-1}$$

## 11. Crystallographic data

**Table S4.** Crystal data and structure refinement for (cS)-**5p**.

|                                    |                                                  |
|------------------------------------|--------------------------------------------------|
| Identification code                | 14-TM-20230310_auto                              |
| Empirical formula                  | C <sub>27</sub> H <sub>30</sub> N <sub>8</sub> O |
| Formula weight                     | 482.59                                           |
| Temperature/K                      | 172.99(10)                                       |
| Crystal system                     | monoclinic                                       |
| Space group                        | P2 <sub>1</sub>                                  |
| a/Å                                | 10.3425(2)                                       |
| b/Å                                | 12.0823(2)                                       |
| c/Å                                | 10.7603(2)                                       |
| α/°                                | 90                                               |
| β/°                                | 111.053(2)                                       |
| γ/°                                | 90                                               |
| Volume/Å <sup>3</sup>              | 1254.86(4)                                       |
| Z                                  | 2                                                |
| ρ <sub>calc</sub> /cm <sup>3</sup> | 1.277                                            |



|                                                                 |                                                               |
|-----------------------------------------------------------------|---------------------------------------------------------------|
| $\mu/\text{mm}^{-1}$                                            | 0.659                                                         |
| F(000)                                                          | 512.0                                                         |
| Crystal size/ $\text{mm}^3$                                     | $0.6 \times 0.5 \times 0.3$                                   |
| Radiation                                                       | Cu K $\alpha$ ( $\lambda = 1.54184$ )                         |
| 2 $\Theta$ range for data collection/ $^\circ$ 8.806 to 156.024 |                                                               |
| Index ranges                                                    | $-12 \leq h \leq 12, -15 \leq k \leq 15, -13 \leq l \leq 13$  |
| Reflections collected                                           | 23451                                                         |
| Independent reflections                                         | 5147 [ $R_{\text{int}} = 0.0372, R_{\text{sigma}} = 0.0285$ ] |
| Data/restraints/parameters                                      | 5147/1/332                                                    |
| Goodness-of-fit on $F^2$                                        | 1.034                                                         |
| Final R indexes [ $I \geq 2\sigma(I)$ ]                         | $R_1 = 0.0324, wR_2 = 0.0826$                                 |
| Final R indexes [all data]                                      | $R_1 = 0.0339, wR_2 = 0.0835$                                 |
| Largest diff. peak/hole / $e \text{ \AA}^{-3}$ 0.15/-0.16       |                                                               |
| Flack parameter                                                 | -0.03(10)                                                     |

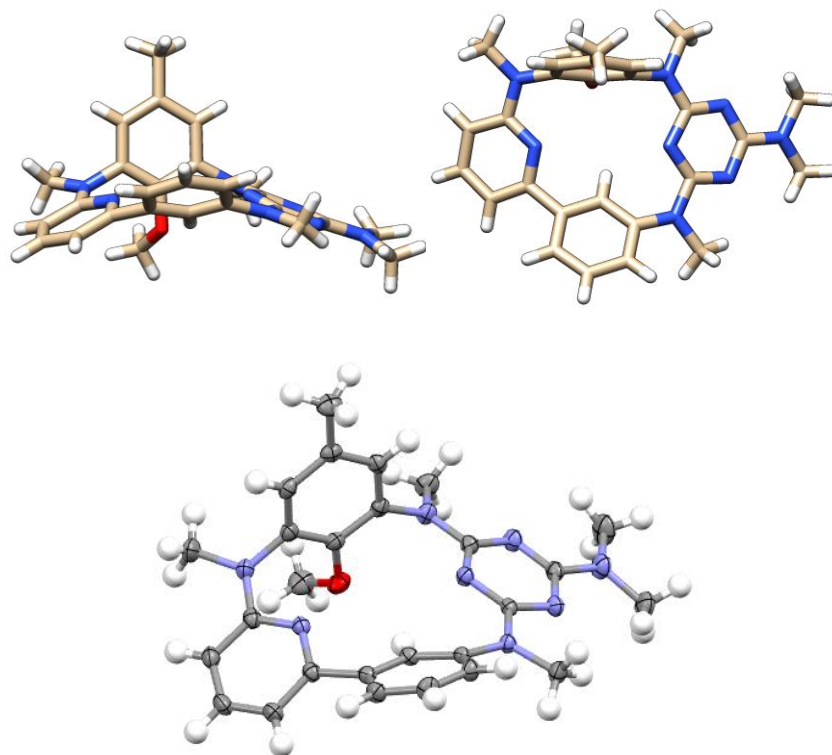

**Figure S6.** X-ray molecular structures of (*cS*)-**5p**. Oak ridge thermal ellipsoid plot (ORTEP) diagram of (*cS*)-**5p**. Thermal ellipsoids are shown at the 50% probability level.

**Table S5.** Crystal data and structure refinement for (*cR*)-**5w**.

|                                    |                                                                               |
|------------------------------------|-------------------------------------------------------------------------------|
| Identification code                | 5w-20240307-1_auto                                                            |
| Empirical formula                  | C <sub>30</sub> H <sub>35</sub> Cl <sub>2</sub> N <sub>7</sub> O <sub>2</sub> |
| Formula weight                     | 596.55                                                                        |
| Temperature/K                      | 172.99(10)                                                                    |
| Crystal system                     | monoclinic                                                                    |
| Space group                        | P2 <sub>1</sub>                                                               |
| a/Å                                | 10.11960(10)                                                                  |
| b/Å                                | 10.25230(10)                                                                  |
| c/Å                                | 15.3641(2)                                                                    |
| α/°                                | 90                                                                            |
| β/°                                | 108.4350(10)                                                                  |
| γ/°                                | 90                                                                            |
| Volume/Å <sup>3</sup>              | 1512.21(3)                                                                    |
| Z                                  | 2                                                                             |
| ρ <sub>calc</sub> /cm <sup>3</sup> | 1.310                                                                         |
| μ/mm <sup>-1</sup>                 | 2.251                                                                         |

|                                             |                                                               |
|---------------------------------------------|---------------------------------------------------------------|
| F(000)                                      | 628.0                                                         |
| Crystal size/mm <sup>3</sup>                | 0.35 × 0.2 × 0.15                                             |
| Radiation                                   | Cu Kα (λ = 1.54184)                                           |
| 2θ range for data collection/°              | 6.064 to 153.264                                              |
| Index ranges                                | -12 ≤ h ≤ 12, -12 ≤ k ≤ 12, -19 ≤ l ≤ 19                      |
| Reflections collected                       | 29091                                                         |
| Independent reflections                     | 6207 [R <sub>int</sub> = 0.0374, R <sub>sigma</sub> = 0.0292] |
| Data/restraints/parameters                  | 6207/1/378                                                    |
| Goodness-of-fit on F <sup>2</sup>           | 1.050                                                         |
| Final R indexes [I ≥ 2σ (I)]                | R <sub>1</sub> = 0.0477, wR <sub>2</sub> = 0.1276             |
| Final R indexes [all data]                  | R <sub>1</sub> = 0.0494, wR <sub>2</sub> = 0.1290             |
| Largest diff. peak/hole / e Å <sup>-3</sup> | 0.63/-0.58                                                    |
| Flack parameter                             | 0.019(8)                                                      |

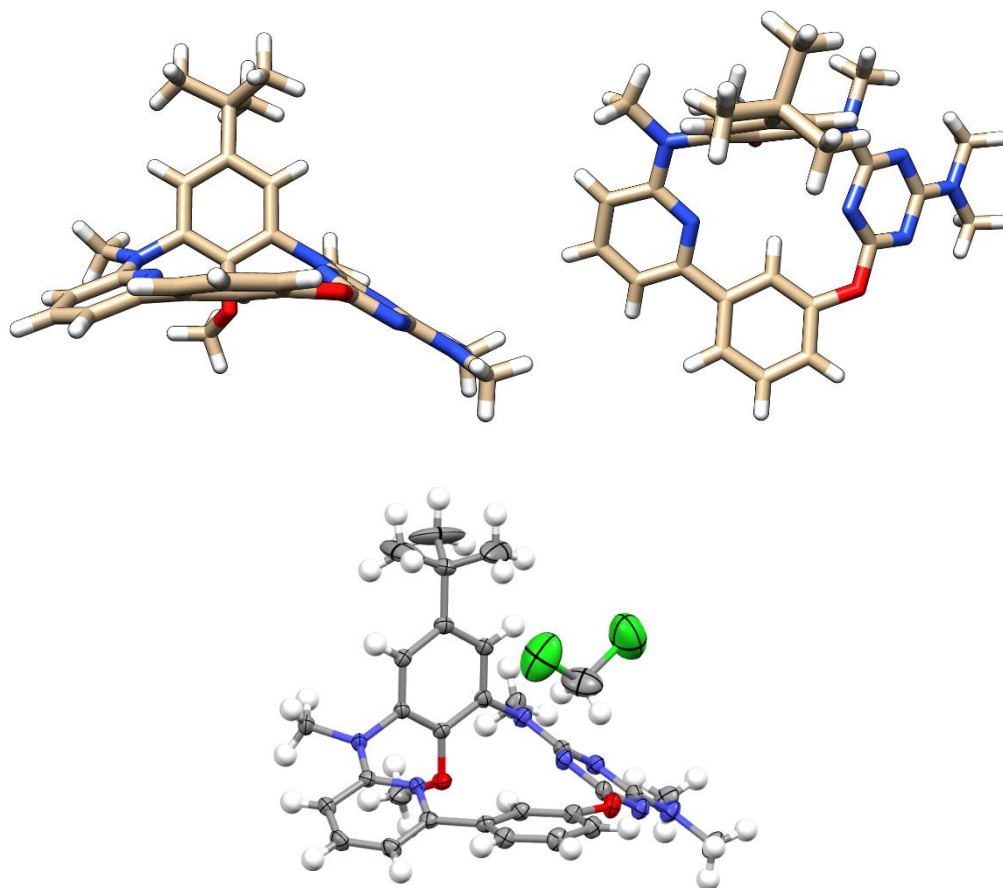

**Figure S7.** X-ray molecular structures of (*cR*)-**5w**. Oak ridge thermal ellipsoid plot (ORTEP) diagram of (*cR*)-**5w**. Thermal ellipsoids are shown at the 50% probability level.

## 12. Copies of UV-vis spectra and fluorescence spectra

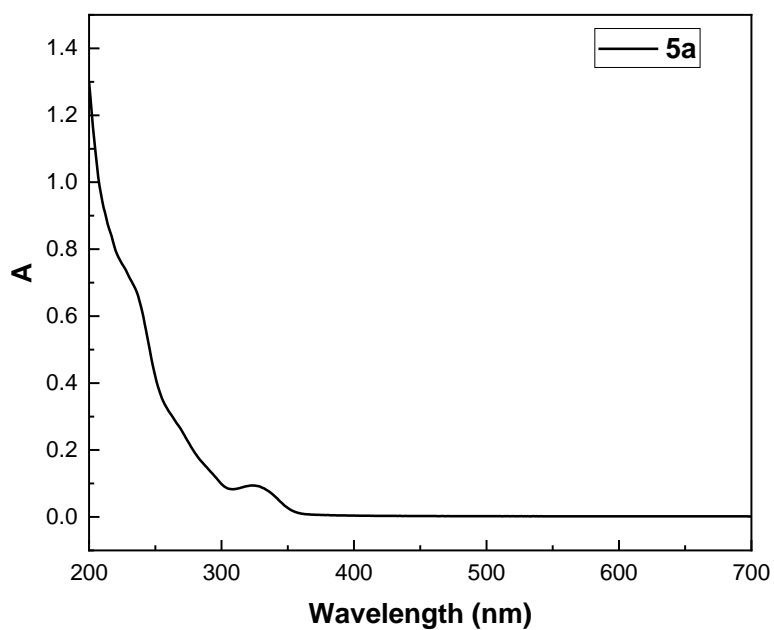

**Figure S8.** UV-vis spectrum of **5a** in CH<sub>3</sub>CN at 25 °C, the concentration was  $5 \times 10^{-5}$  M

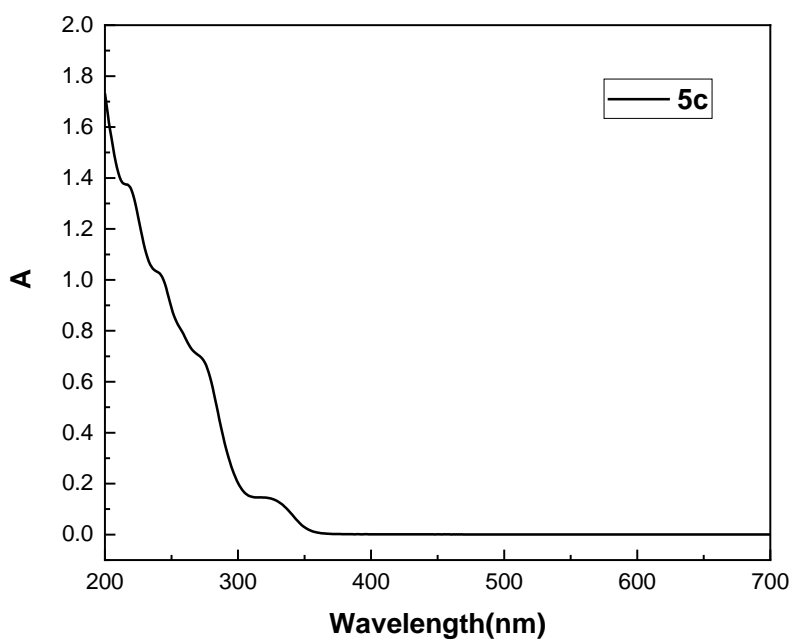

**Figure S9.** UV-vis spectrum of **5c** in CH<sub>3</sub>CN at 25 °C, the concentration was  $6 \times 10^{-5}$

M

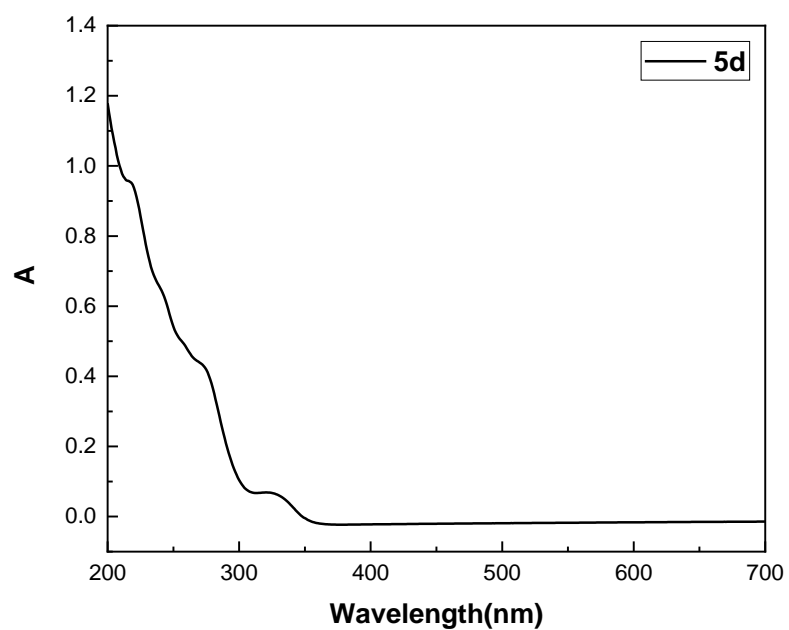

**Figure S10.** UV-vis spectrum of **5d** in CH<sub>3</sub>CN at 25 °C, the concentration was  $4 \times 10^{-5}$

M

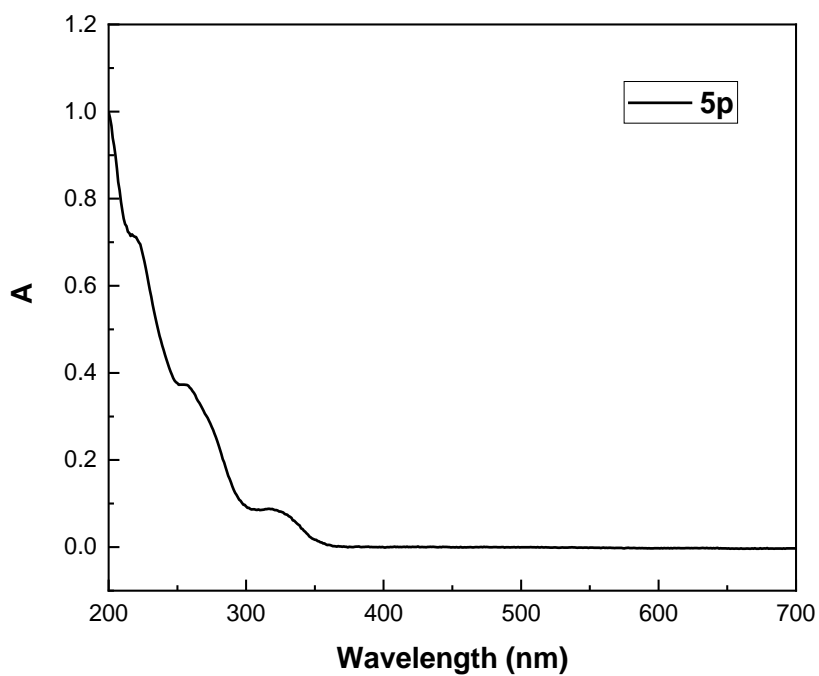

**Figure S11.** UV-vis spectrum of **5p** in CH<sub>3</sub>CN at 25 °C, the concentration was

$4 \times 10^{-5}$  M

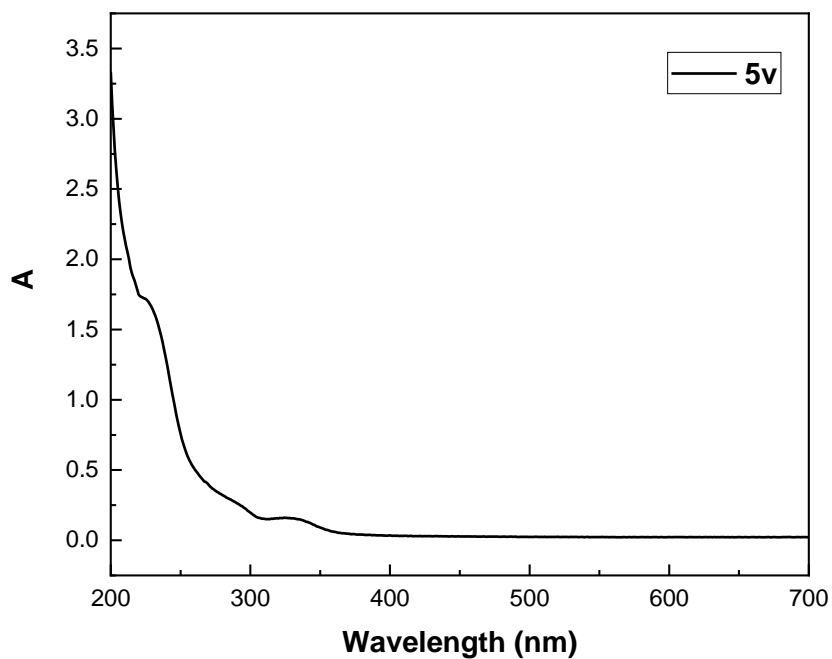

**Figure S12.** UV-Vis spectrum of **5v** in CH<sub>3</sub>CN at 25 °C, the concentration was  $1 \times 10^{-4}$  M

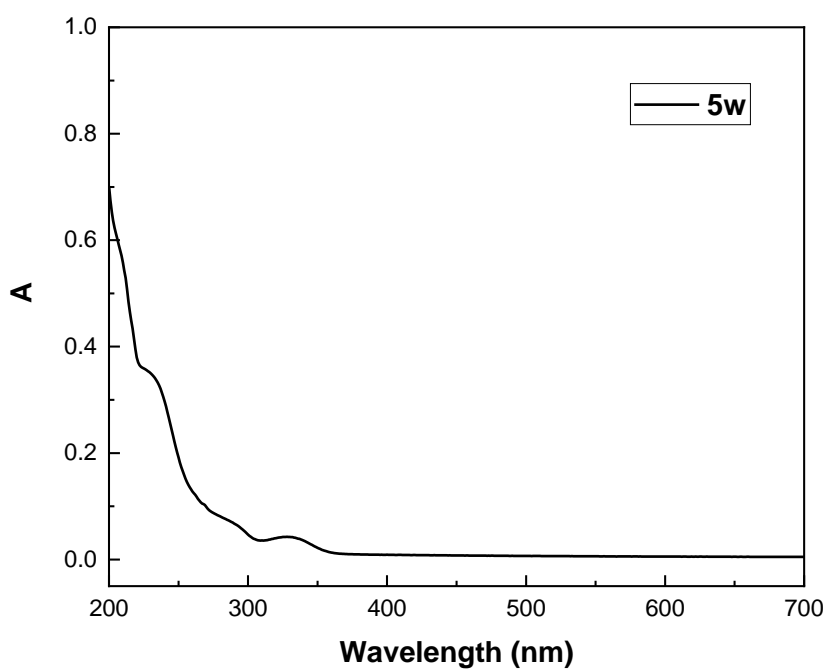

**Figure S13.** UV-Vis spectrum of **5w** in CH<sub>3</sub>CN at 25 °C, the concentration was  $2 \times 10^{-5}$  M



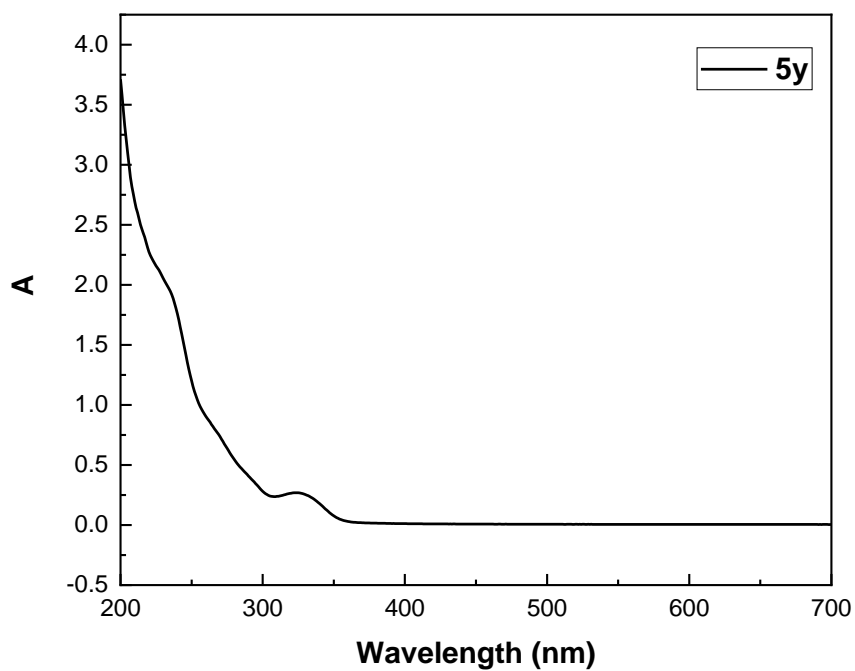

**Figure S14.** UV-Vis spectrum of **5y** in CH<sub>3</sub>CN at 25 °C, the concentration was  $1 \times 10^{-4}$

M

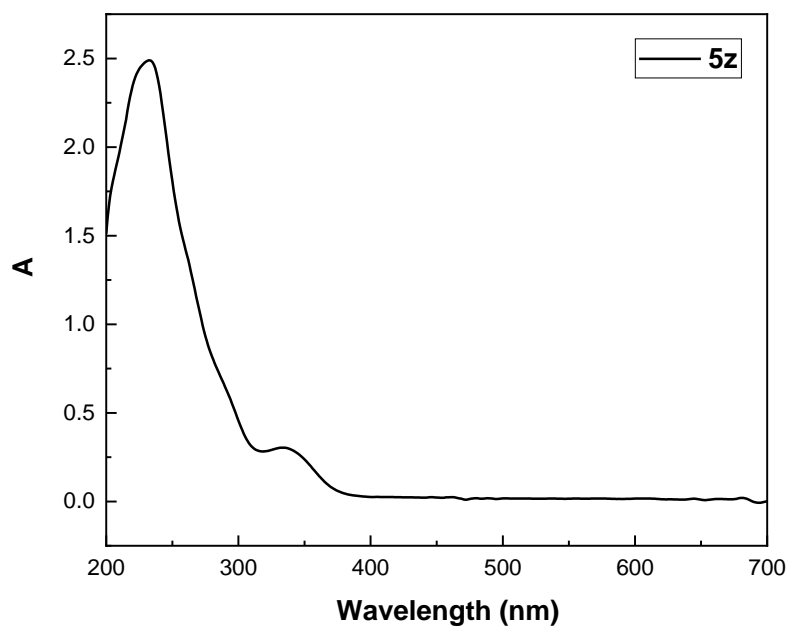

**Figure S15.** UV-Vis spectrum of **5z** in CH<sub>3</sub>CN at 25 °C, the concentration was  $6 \times 10^{-5}$

M

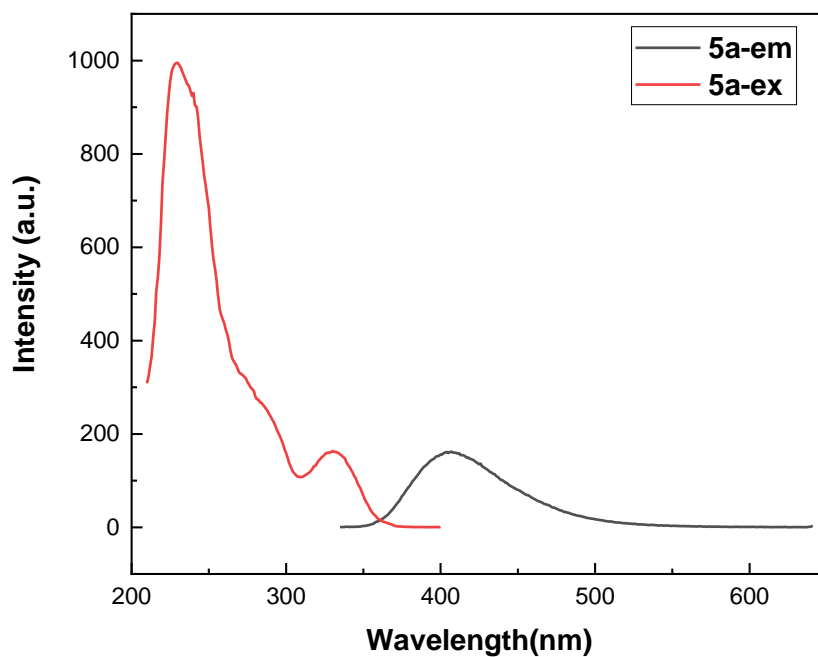

**Figure S16.** Fluorescence spectrum of **5a** in  $\text{CH}_3\text{CN}$  at  $25\text{ }^\circ\text{C}$ , the concentration was  $1 \times 10^{-5}\text{ M}$

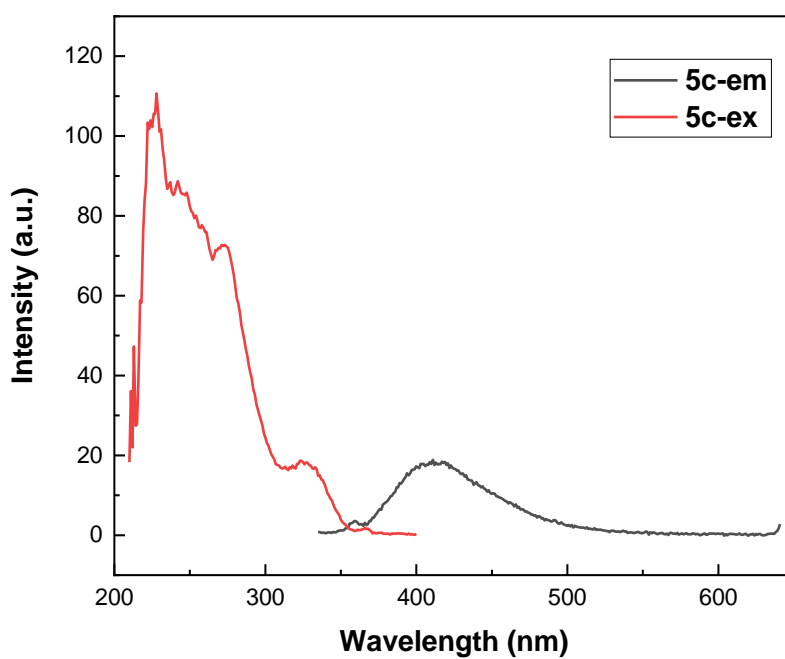

**Figure S17.** Fluorescence spectrum of **5c** in  $\text{CH}_3\text{CN}$  at  $25\text{ }^\circ\text{C}$ , the concentration was  $5 \times 10^{-6}\text{ M}$

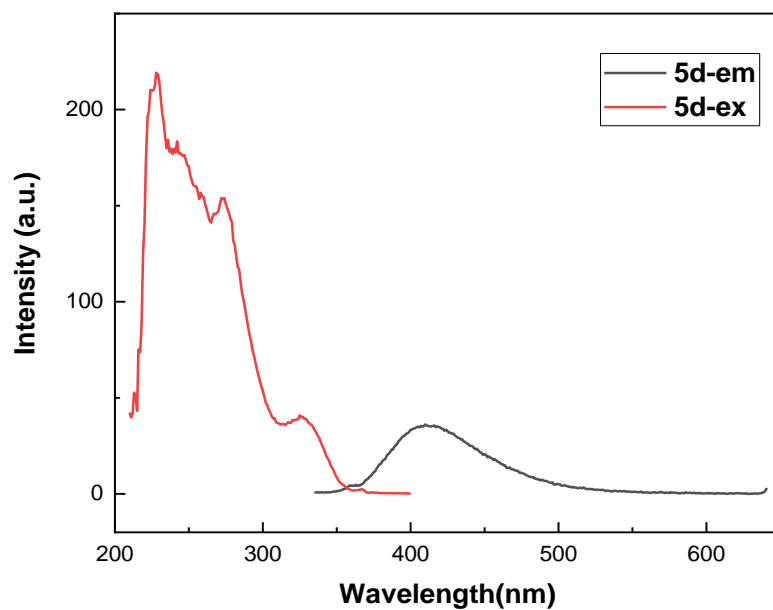

**Figure S18.** Fluorescence spectrum of **5d** in CH<sub>3</sub>CN at 25 °C, the concentration was  $5 \times 10^{-6}$  M

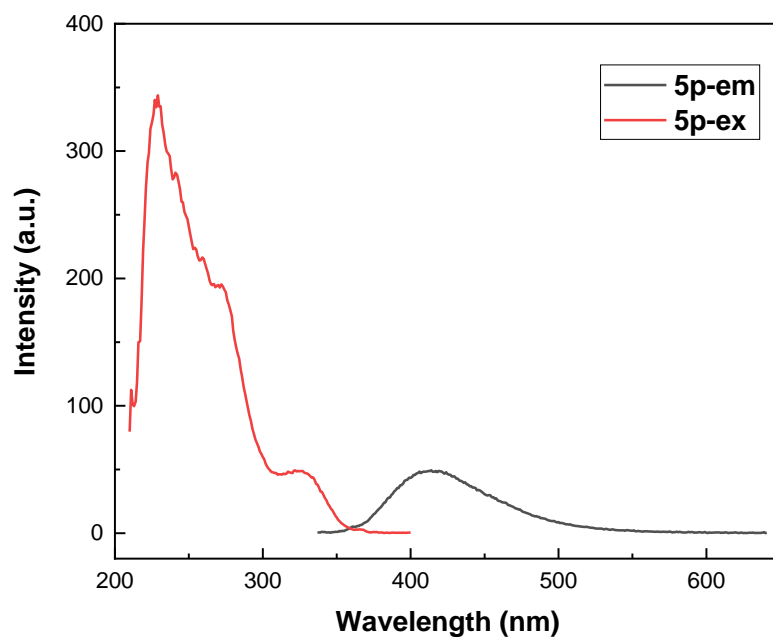

**Figure S19.** Fluorescence spectrum of **5p** in CH<sub>3</sub>CN at 25 °C, the concentration was  $5 \times 10^{-6}$  M

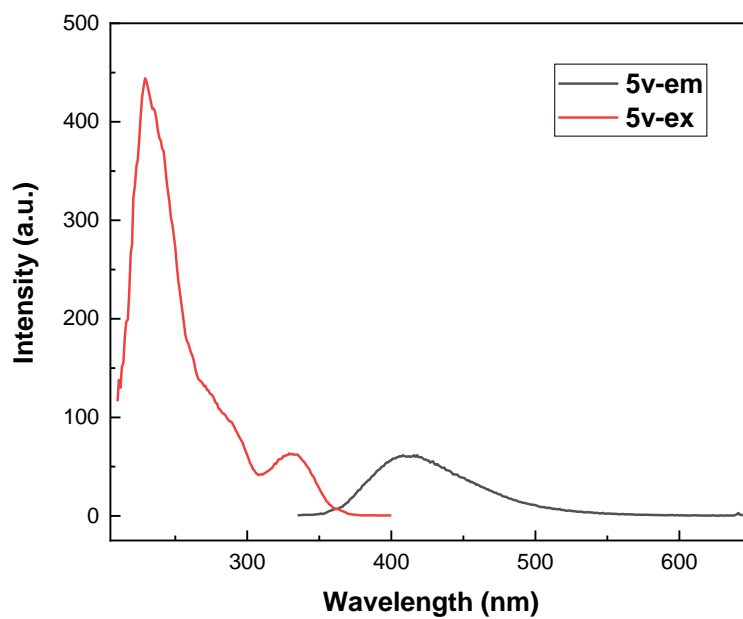

**Figure S20.** Fluorescence spectrum of **5v** in CH<sub>3</sub>CN at 25 °C, the concentration was  $5 \times 10^{-6}$  M

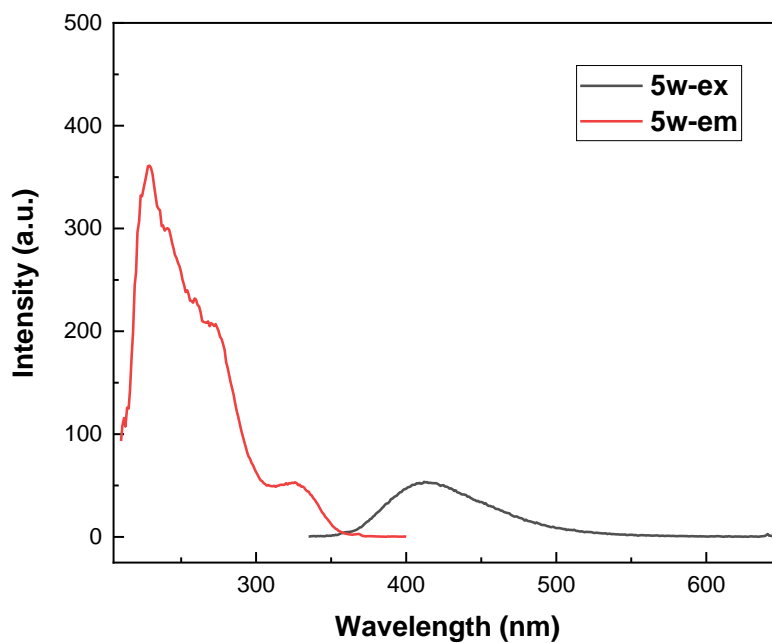

**Figure S21.** Fluorescence spectrum of **5w** in CH<sub>3</sub>CN at 25 °C, the concentration was  $5 \times 10^{-6}$  M

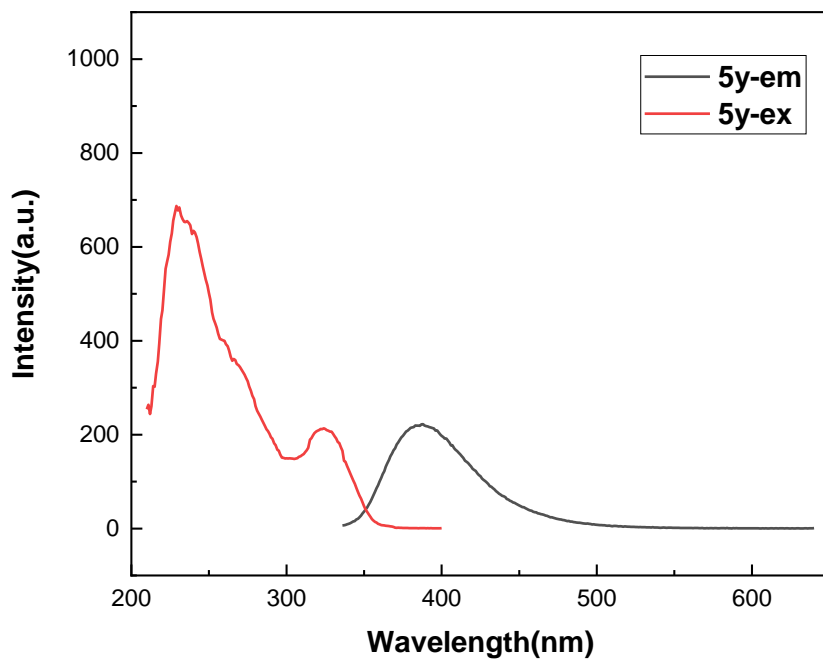

**Figure S22.** Fluorescence spectrum of **5y** in CH<sub>3</sub>CN at 25 °C, the concentration was  $1 \times 10^{-5}$  M

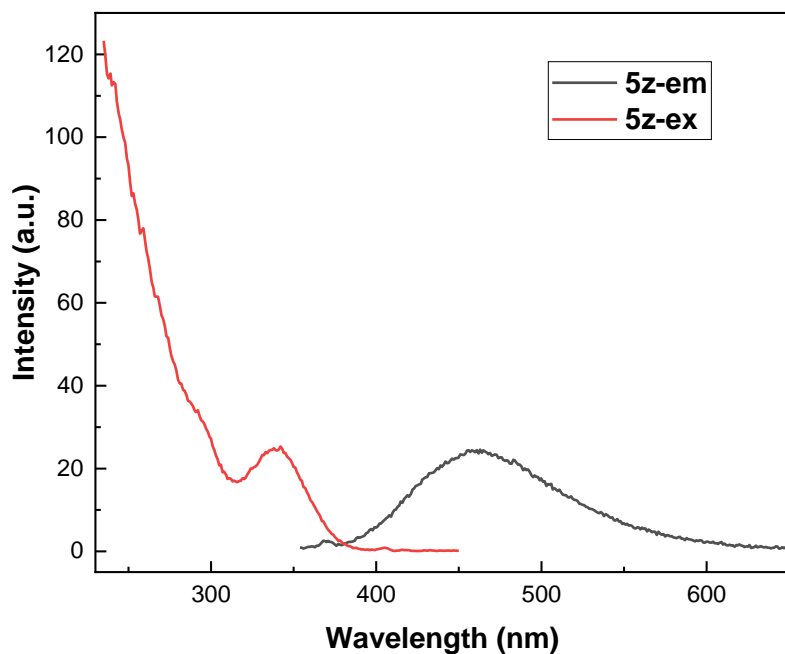

**Figure S23.** Fluorescence spectrum of **5z** in CH<sub>3</sub>CN at 25 °C, the concentration was  $1 \times 10^{-6}$  M

**Table S6.** Summary of the UV-vis and fluorescence spectra.

| Compd     | $\lambda_{\text{abs}}$ (nm) [ $\epsilon_{\text{max}}$ ( $\text{cm}^{-1} \text{M}^{-1}$ )] | $\lambda_{\text{ex}}$ (nm) | $\lambda_{\text{em}}$ (nm) | $\Phi^{[\text{a}]}$ (%) |
|-----------|-------------------------------------------------------------------------------------------|----------------------------|----------------------------|-------------------------|
| <b>5a</b> | 325 (1860)                                                                                | 328                        | 410                        | 21.5                    |
| <b>5c</b> | 326 (1850)                                                                                | 326                        | 409                        | 15.6                    |
| <b>5d</b> | 328 (1740)                                                                                | 326                        | 408                        | 11.0                    |
| <b>5p</b> | 321 (1900)                                                                                | 325                        | 413                        | 18.3                    |
| <b>5v</b> | 326 (1600)                                                                                | 326                        | 408                        | 20.1                    |
| <b>5w</b> | 325 (1800)                                                                                | 328                        | 410                        | 15.2                    |
| <b>5y</b> | 323 (1440)                                                                                | 327                        | 411                        | 21.5                    |
| <b>5z</b> | 340 (1680)                                                                                | 342                        | 462                        | 12.5                    |

<sup>[a]</sup>Quantum yield determined in solution, using 2-aminopyridine as reference  $\phi_{\text{ref}} = 0.6$  in 0.1 N H<sub>2</sub>SO<sub>4</sub>.

### 13. Copies of CD and CPL spectra

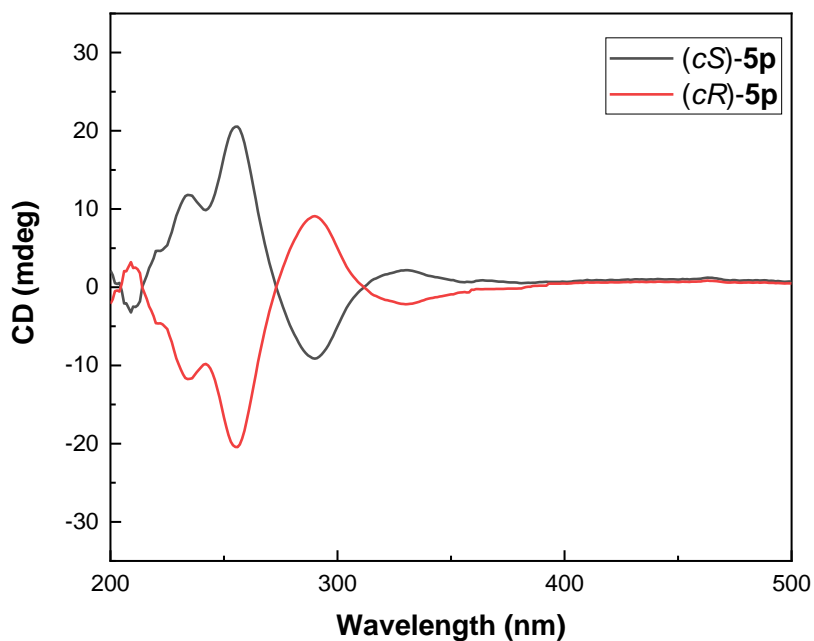

**Figure S24.** CD spectrum of (*cR*)-**5p** and (*cS*)-**5p** in CH<sub>3</sub>CN at 25 °C (*c* 5×10<sup>-6</sup> M)

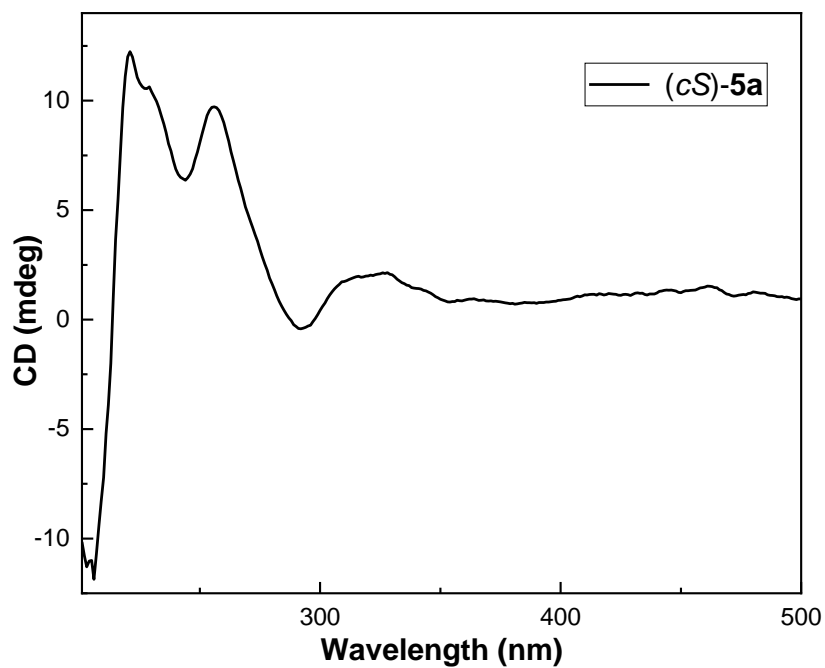

**Figure S25.** CD spectrum of (*cS*)-**5a** in CH<sub>3</sub>CN at 25 °C (*c* 5×10<sup>-6</sup> M)

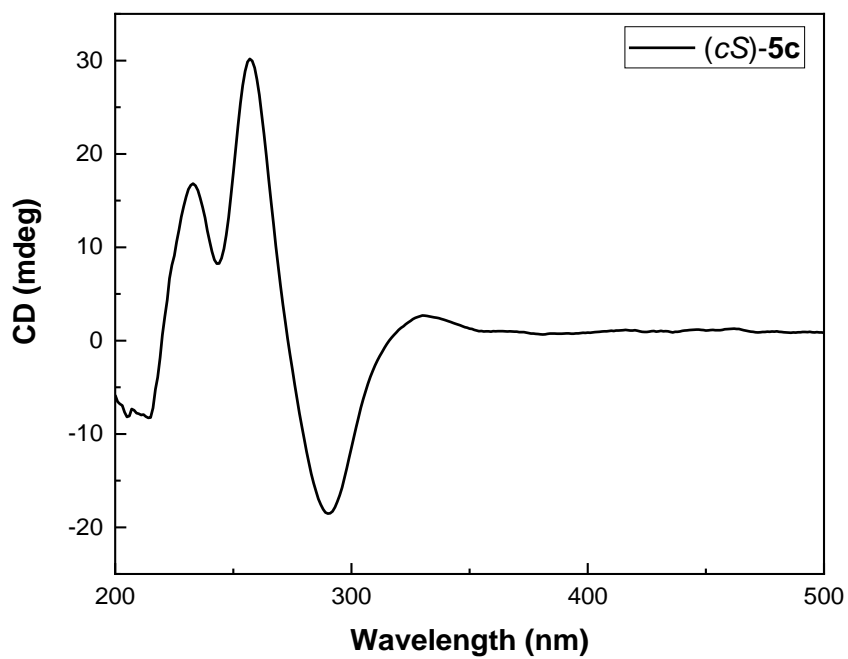

**Figure S26.** CD spectrum of (cS)-5c in CH<sub>3</sub>CN at 25 °C (*c* 5×10<sup>-6</sup> M)

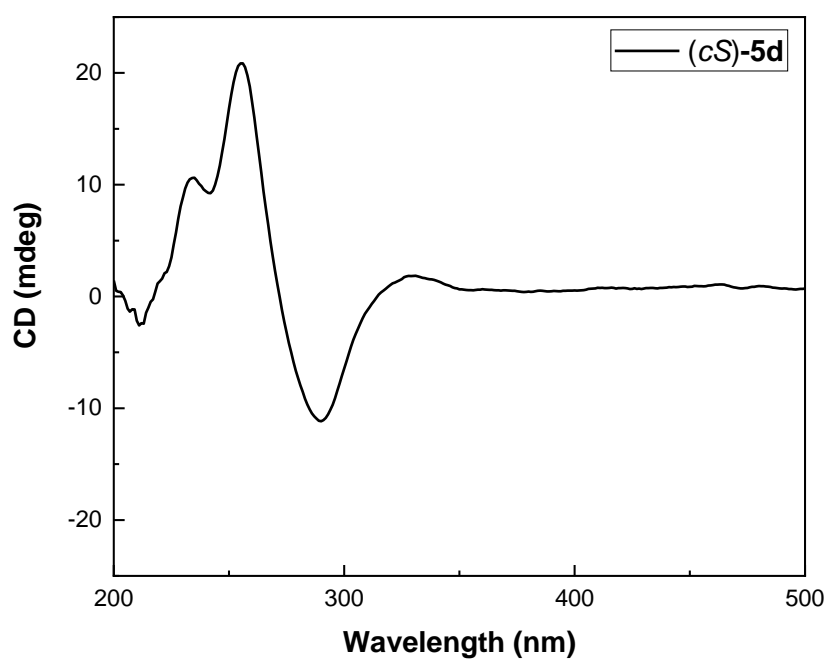

**Figure S27.** CD spectrum of (cS)-5d in CH<sub>3</sub>CN at 25 °C (*c* 5×10<sup>-6</sup> M)



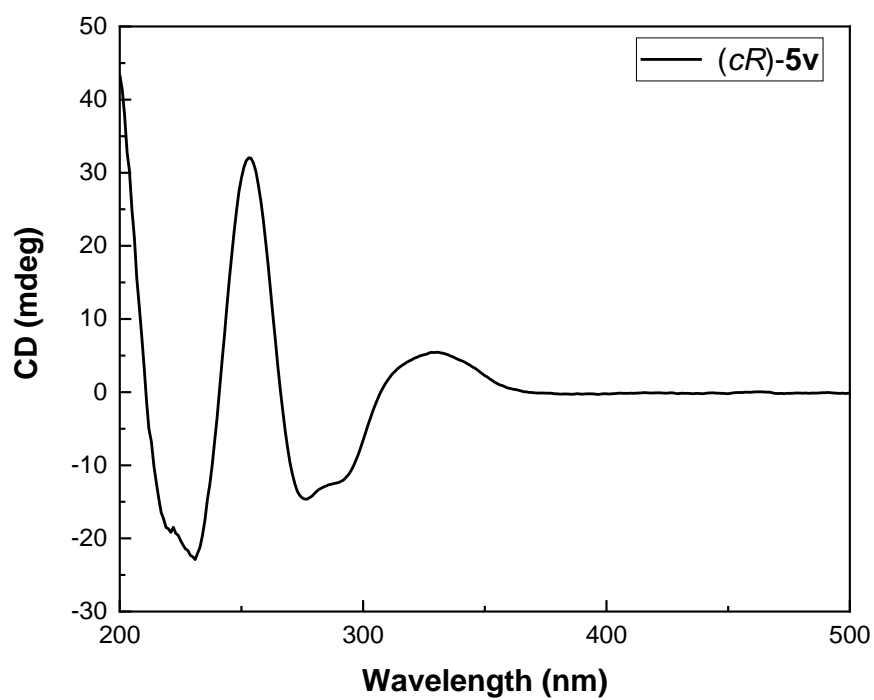

**Figure S28.** CD spectrum of (cR)-5v in CH<sub>3</sub>CN at 25 °C (2 × 10<sup>-6</sup> M)

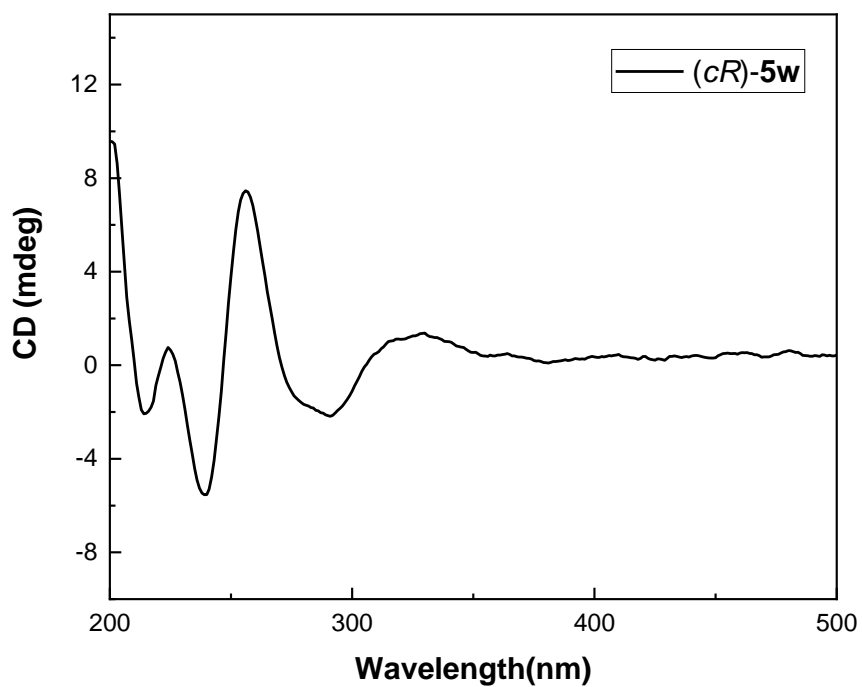

**Figure S29.** CD spectrum of (cR)-5w in CH<sub>3</sub>CN at 25 °C (2 × 10<sup>-6</sup> M)

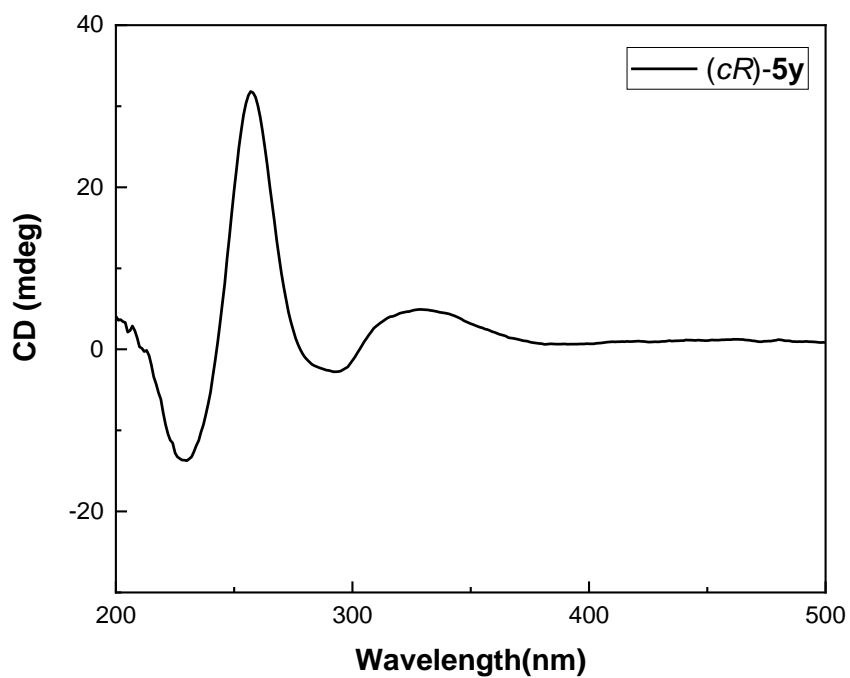

**Figure S30.** CD spectrum of (cR)-5y in toluene at 25 °C ( $5 \times 10^{-6}$  M)

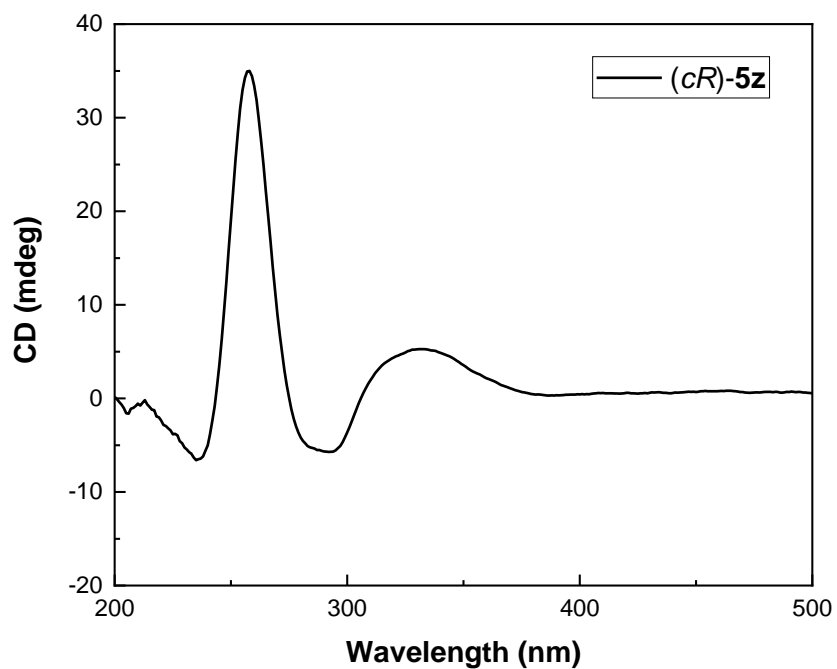

**Figure S31.** CD spectrum of (cR)-5z in  $\text{CH}_3\text{CN}$  at 25 °C ( $5 \times 10^{-6}$  M)

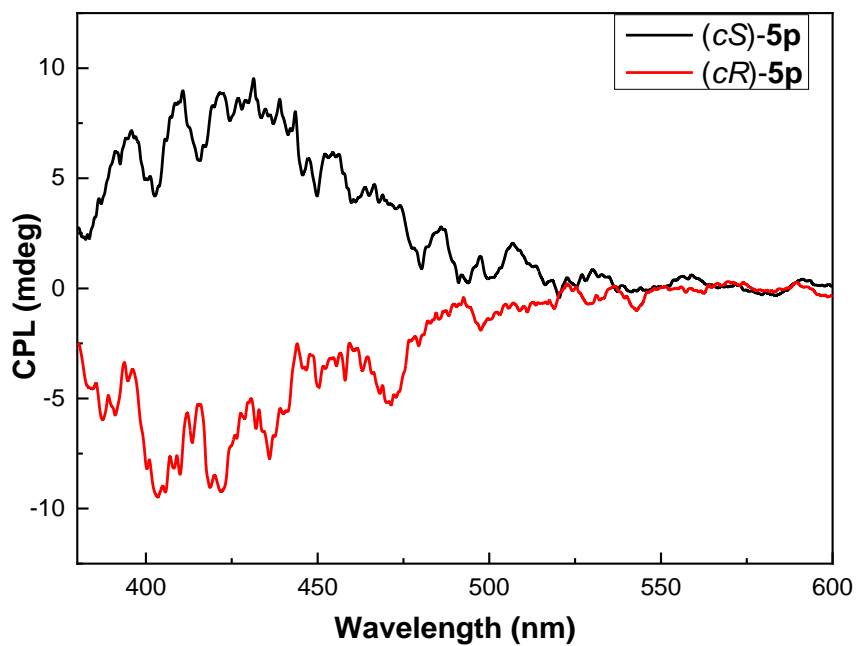

**Figure S32.** CPL spectrum of (*cR*)-5p and (*cS*)-5p in CH<sub>3</sub>CN at 25 °C (*c* 1×10<sup>-4</sup> M)

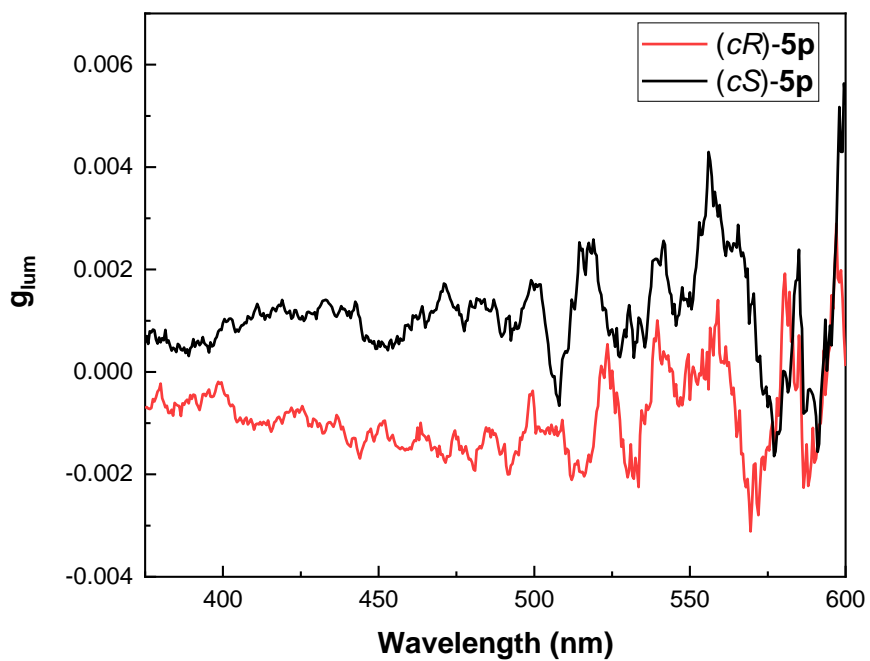

**Figure S33.** CPL(g<sub>lum</sub>) of (*cR*)-5p and (*cS*)-5p in CH<sub>3</sub>CN at 25 °C (*c* 1×10<sup>-4</sup> M)

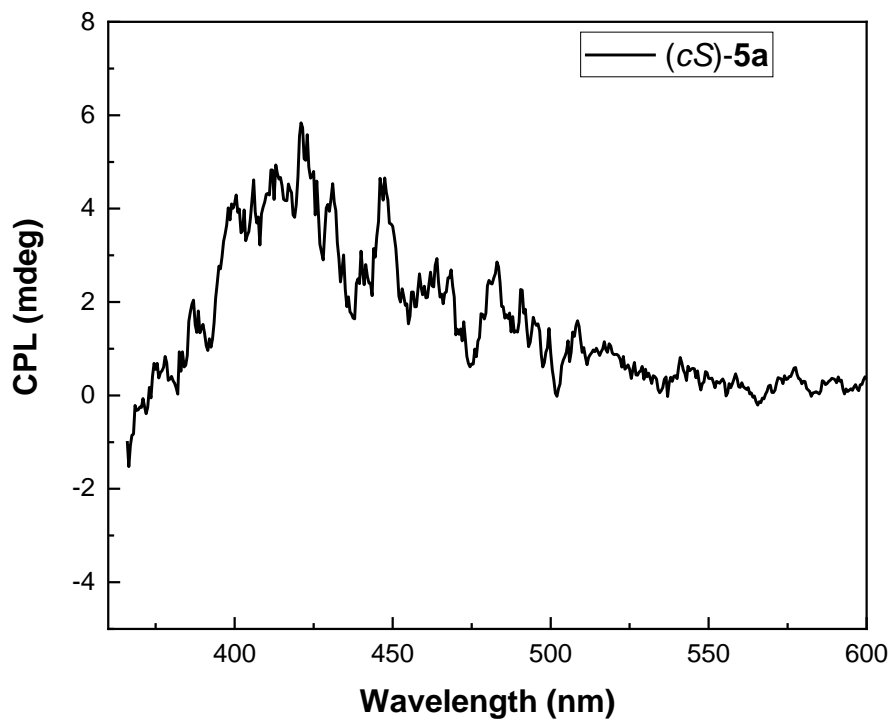

**Figure S34.** CPL spectrum of (cS)-5a in CH<sub>3</sub>CN at 25 °C (*c* 1×10<sup>-4</sup> M)

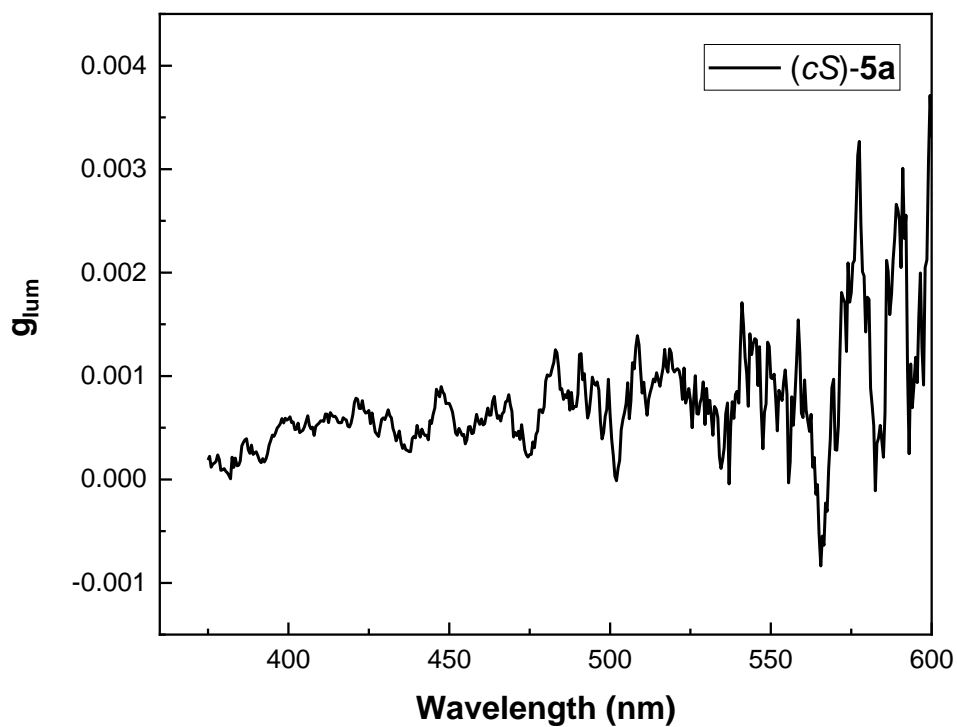

**Figure S35.** CPL(g<sub>lum</sub>) of (cS)-5a in CH<sub>3</sub>CN at 25 °C (*c* 1×10<sup>-4</sup> M)

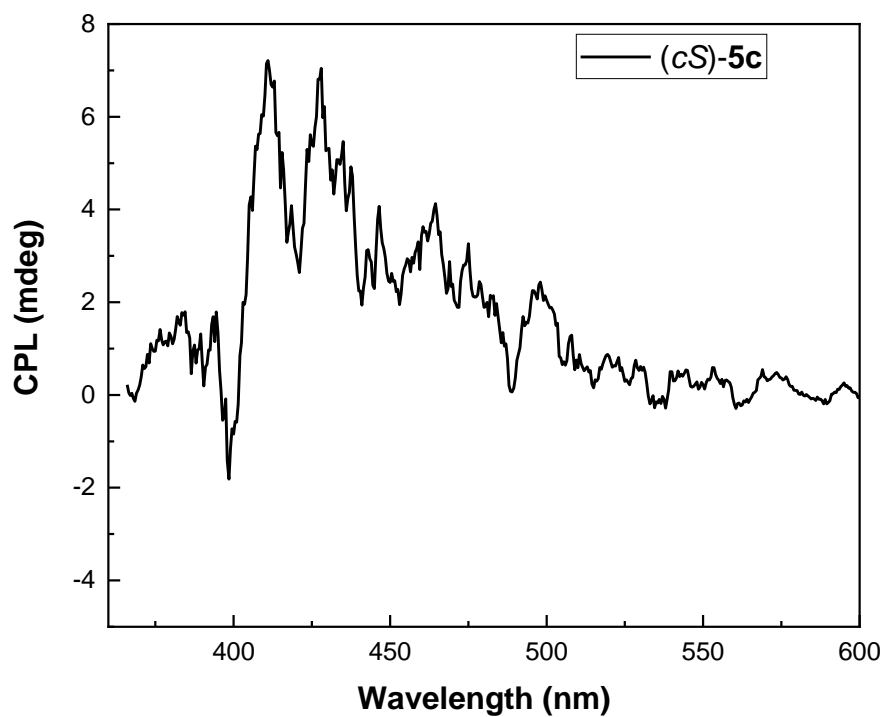

**Figure S36.** CPL spectrum of (cS)-5c in CH<sub>3</sub>CN at 25 °C (*c* 1×10<sup>-4</sup> M)

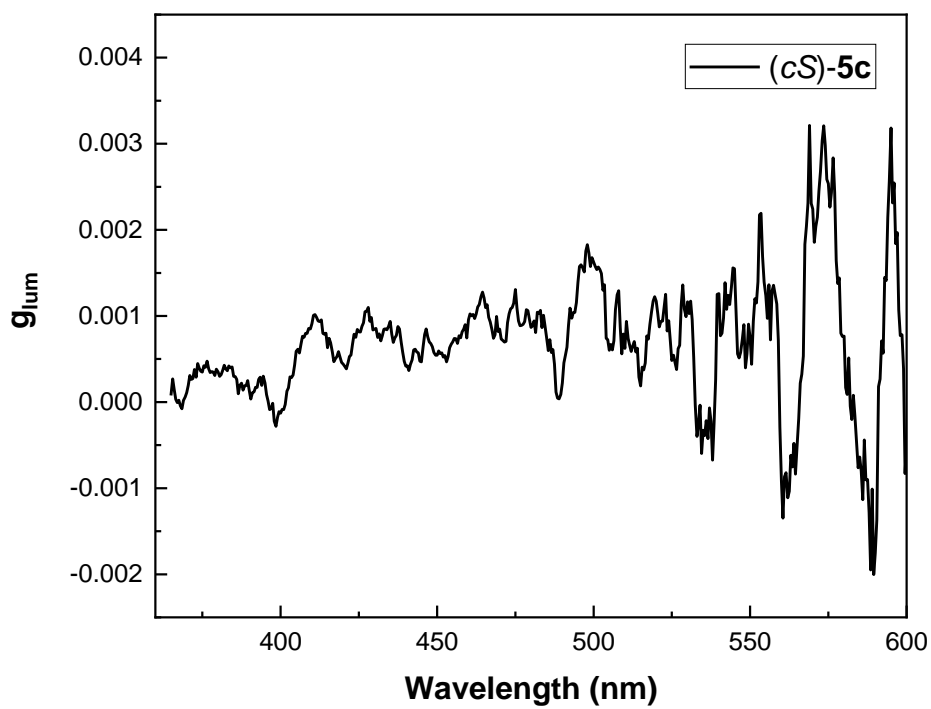

**Figure S37.** CPL(g<sub>lum</sub>) of (cS)-5c in CH<sub>3</sub>CN at 25 °C (*c* 1×10<sup>-4</sup> M)

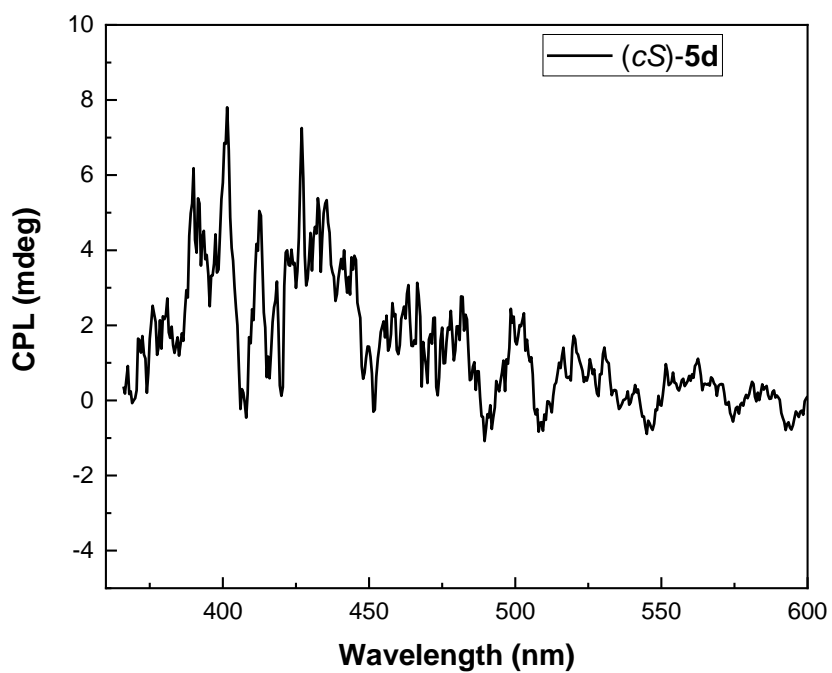

**Figure S38.** CPL spectrum of (cS)-5d in CH<sub>3</sub>CN at 25 °C (*c* 1×10<sup>-4</sup> M)

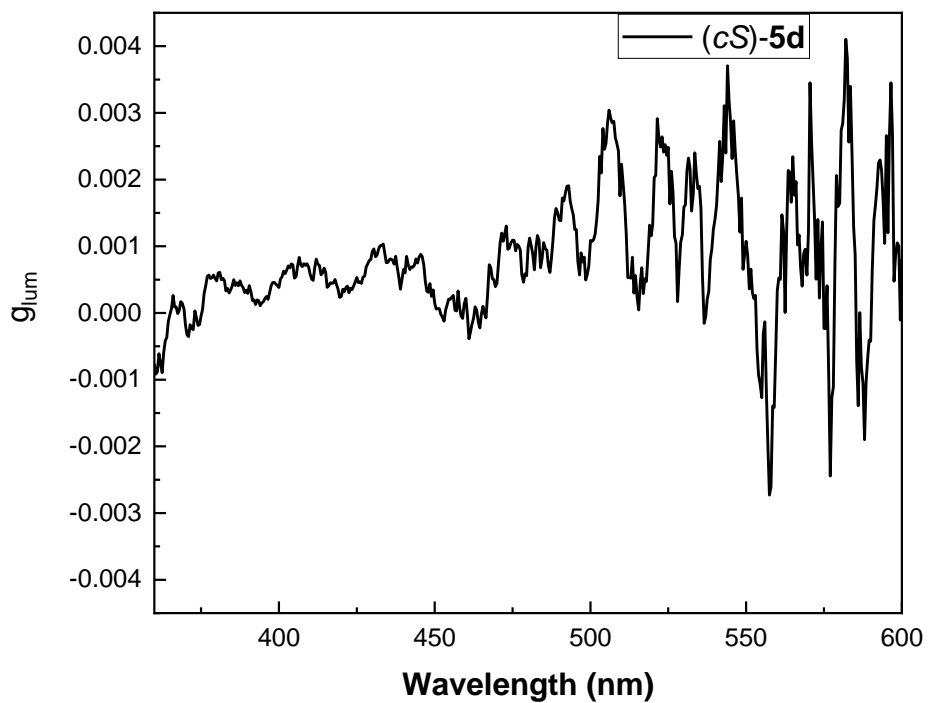

**Figure S39.** CPL(*g*<sub>lum</sub>) of (cS)-5d in CH<sub>3</sub>CN at 25 °C (*c* 1×10<sup>-4</sup> M)

**Table S7.** Summary of the *g*<sub>abs</sub> for CD, *g*<sub>lum</sub> and *B*<sub>CPL</sub> for CPL .

| Compd.                   | CD $g_{\text{abs}}$                                                                              | CPL $g_{\text{lum}}$           | $B_{\text{CPL}}$ |
|--------------------------|--------------------------------------------------------------------------------------------------|--------------------------------|------------------|
| ( <i>cS</i> )- <b>5p</b> | $1.1 \times 10^{-3}$ (256 nm); $-2.4 \times 10^{-3}$ (291 nm);<br>$1.1 \times 10^{-3}$ (330 nm)  | $1.3 \times 10^{-3}$ (411 nm)  | 0.65             |
| ( <i>cR</i> )- <b>5p</b> | $1.1 \times 10^{-3}$ (256 nm); $2.5 \times 10^{-3}$ (291 nm); -<br>$1.0 \times 10^{-3}$ (330 nm) | $-1.1 \times 10^{-3}$ (410 nm) | 0.65             |
| ( <i>cS</i> )- <b>5a</b> | $1.7 \times 10^{-3}$ (256 nm); $-2.0 \times 10^{-3}$ (291 nm);<br>$1.7 \times 10^{-3}$ (328 nm)  | $0.8 \times 10^{-3}$ (421 nm)  | 0.40             |
| ( <i>cS</i> )- <b>5c</b> | $1.2 \times 10^{-3}$ (257 nm); $-2.3 \times 10^{-3}$ (290 nm);<br>$7.8 \times 10^{-4}$ (330 nm)  | $1.0 \times 10^{-3}$ (411 nm)  | 0.38             |
| ( <i>cS</i> )- <b>5d</b> | $1.7 \times 10^{-3}$ (254 nm); $-2.6 \times 10^{-3}$ (291 nm);<br>$8.0 \times 10^{-4}$ (328 nm)  | $0.9 \times 10^{-3}$ (428 nm)  | 0.35             |
| ( <i>cR</i> )- <b>5v</b> | $1.0 \times 10^{-3}$ (252 nm); $-1.1 \times 10^{-3}$ (291 nm);<br>$8.2 \times 10^{-4}$ (330 nm)  | ---                            | ---              |
| ( <i>cR</i> )- <b>5w</b> | $1.7 \times 10^{-3}$ (254 nm); $-2.6 \times 10^{-3}$ (291 nm);<br>$8.0 \times 10^{-4}$ (328 nm)  | ---                            | ---              |
| ( <i>cR</i> )- <b>5y</b> | $6.2 \times 10^{-4}$ (256 nm); $-6.0 \times 10^{-4}$ (295 nm);<br>$6.8 \times 10^{-4}$ (327 nm)  | ---                            | ---              |
| ( <i>cR</i> )- <b>5z</b> | $1.3 \times 10^{-3}$ (258 nm); $-5 \times 10^{-4}$ (292 nm);<br>$9.5 \times 10^{-4}$ (333 nm)    | ---                            | ---              |

<sup>[a]</sup>  $B_{\text{CPL}}$  value was calculated based on the formula:  $B_{\text{CPL}} = \varepsilon \times \varnothing_{\text{F}} \times g_{\text{lum}}/2$ .

## 14. References

- [1] S. Tong, J.-T. Li, D.-D. Liang, Y.-E. Zhang, Q.-Y. Feng, X. Zhang, J. Zhu, M.-X. Wang, *J. Am. Chem. Soc.* **2020**, *142*, 14432-14436.
- [2] J.-T. Li, L.-X. Wang, D.-X. Wang, L. Zhao, M.-X. Wang, *J. Org. Chem.* **2014**, *79*, 2178-2188.



## 15. Copies of $^1\text{H}$ and $^{13}\text{C}$ NMR spectra

$^1\text{H}$  NMR spectrum of *Monomer-B1* in  $\text{CDCl}_3$  at 298 K

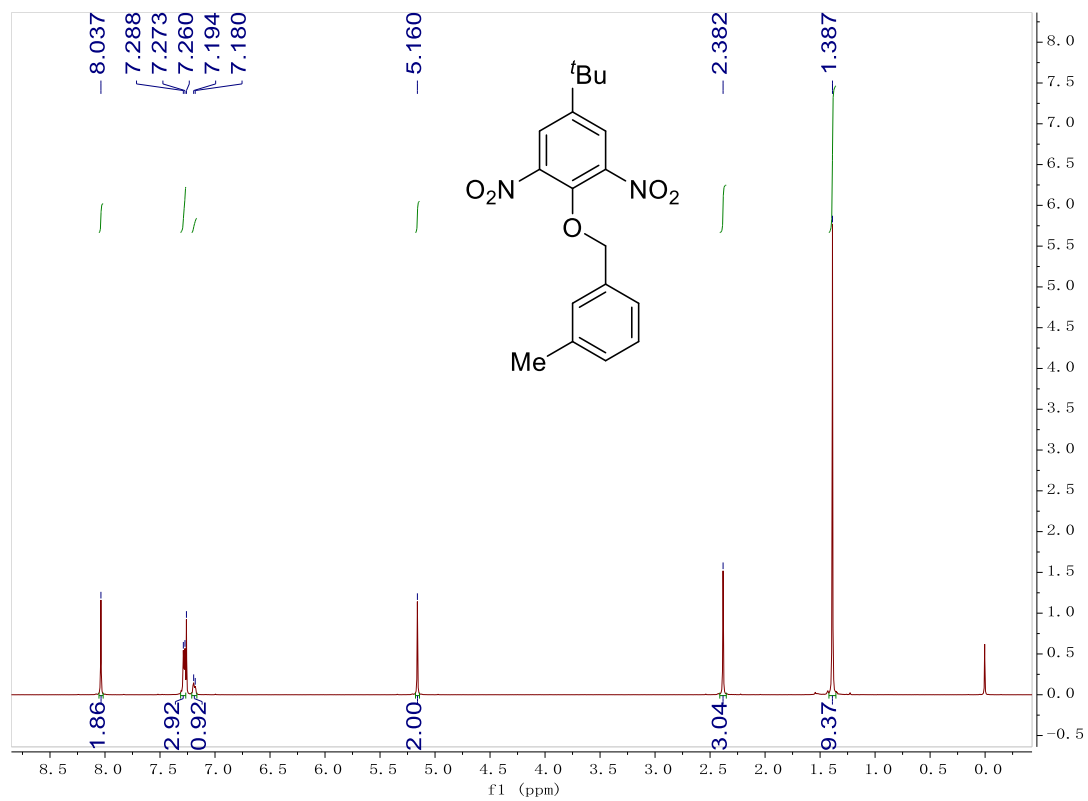

$^{13}\text{C}$  NMR spectrum of *Monomer-B1* in  $\text{CDCl}_3$  at 298 K

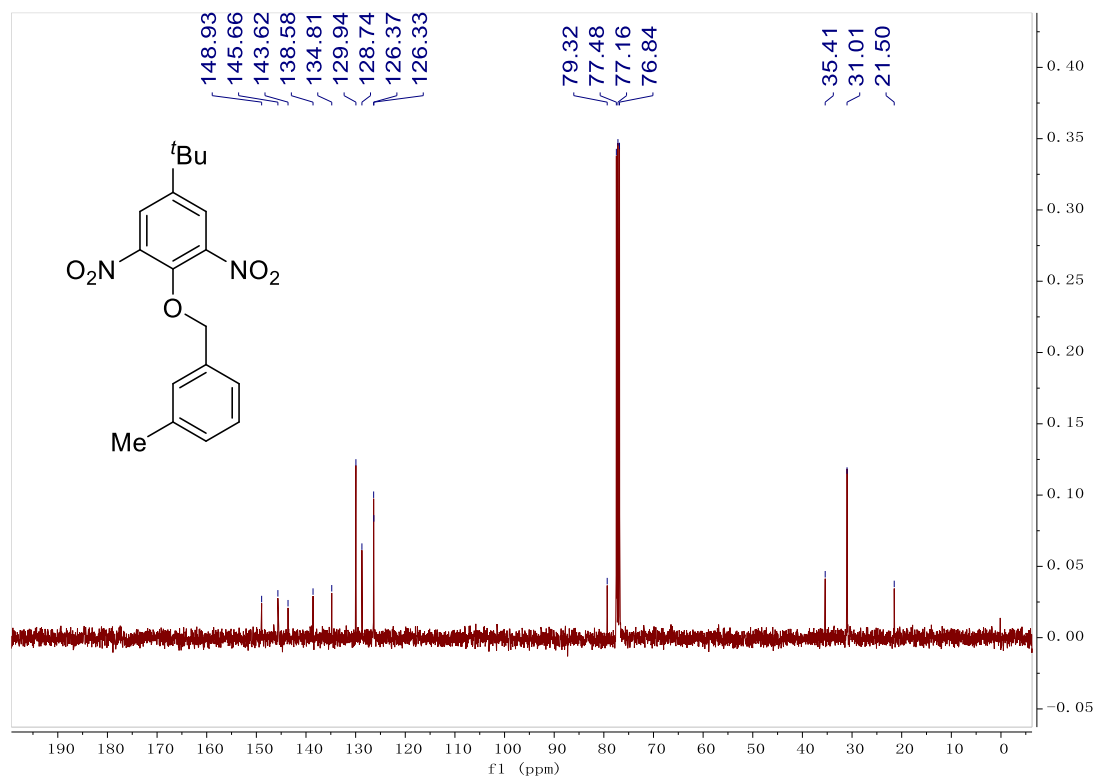

$^1\text{H}$  NMR spectrum of *Monomer-B2* in  $\text{CDCl}_3$  at 298 K

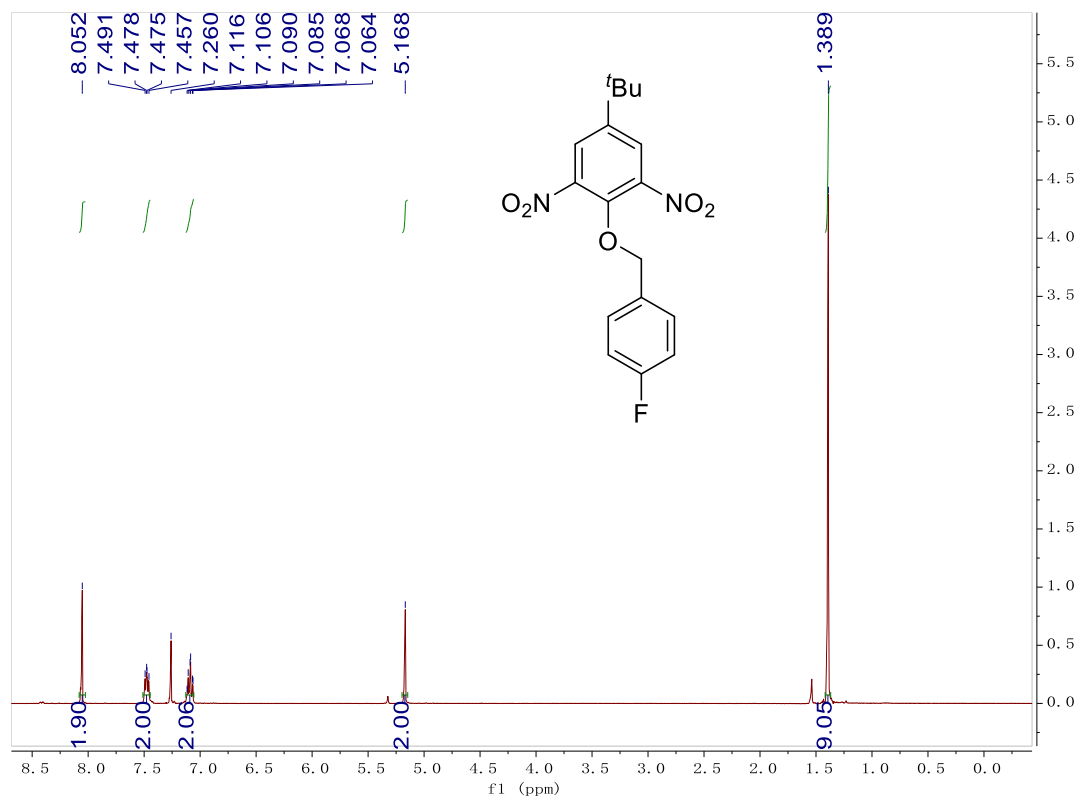

$^{13}\text{C}$  NMR spectrum of *Monomer-B2* in  $\text{CDCl}_3$  at 298 K

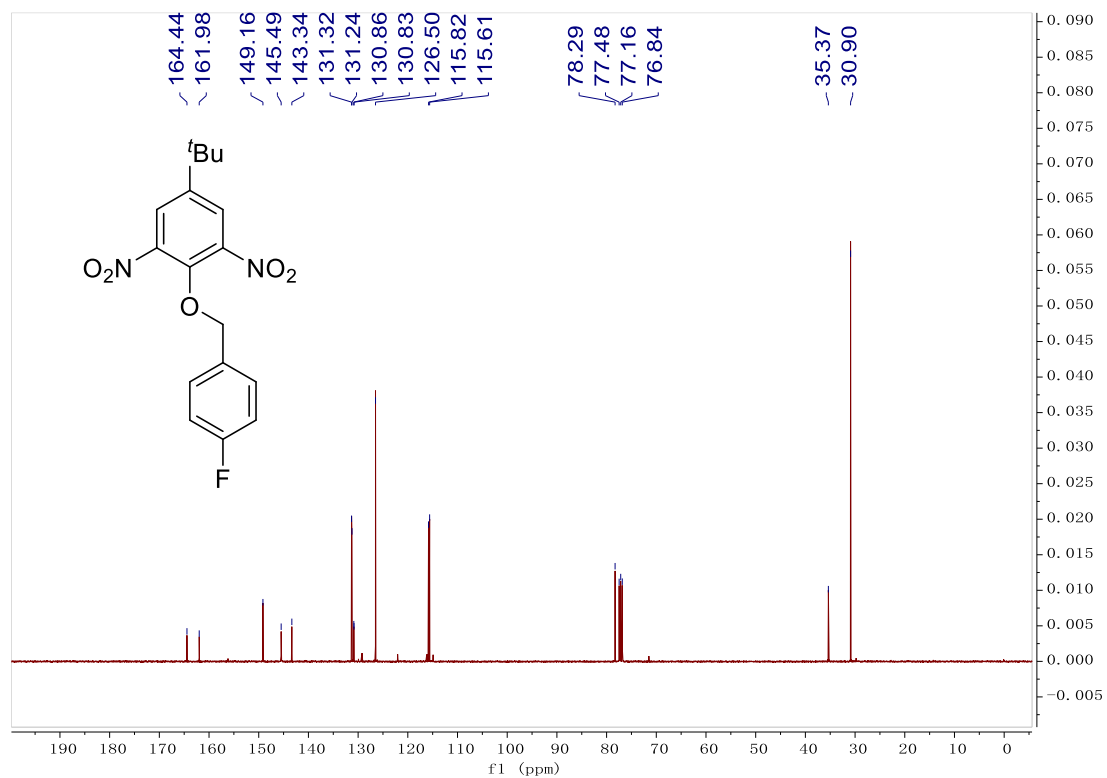

$^1\text{H}$  NMR spectrum of *Monomer-B3* in  $\text{CDCl}_3$  at 298 K

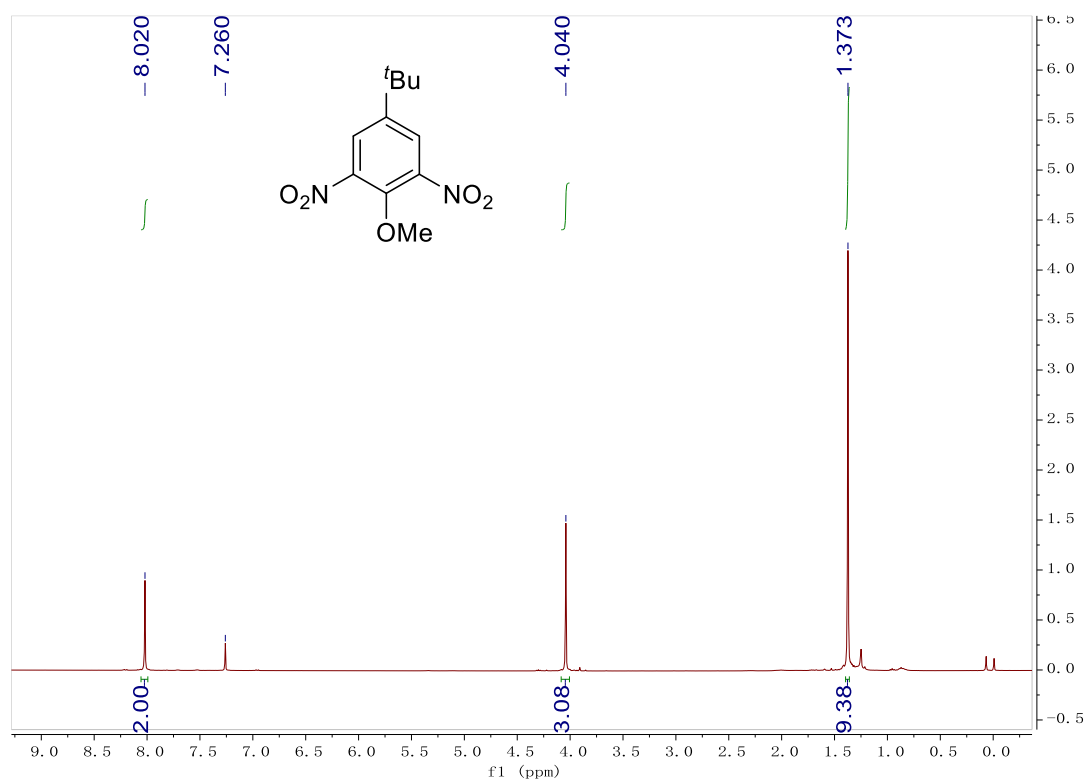

$^{13}\text{C}$  NMR spectrum of *Monomer-B3* in  $\text{CDCl}_3$  at 298 K

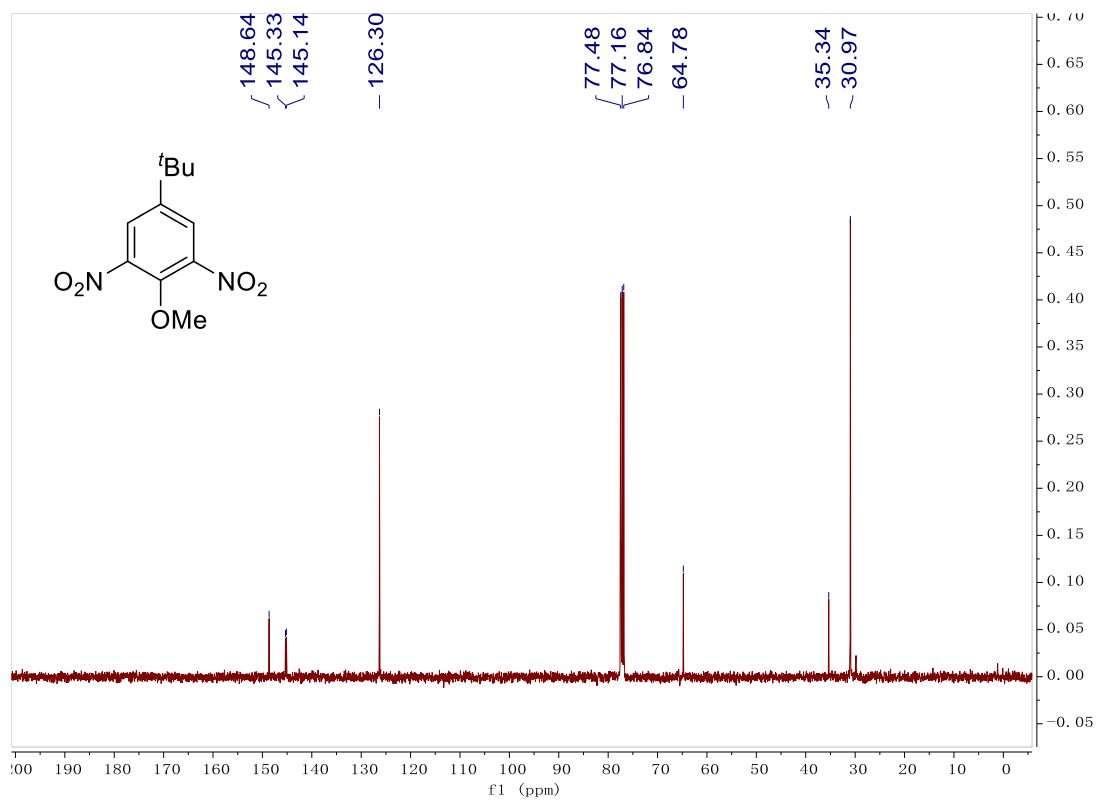

$^1\text{H}$  NMR spectrum of *Monomer-C1* in  $\text{CDCl}_3$  at 298 K

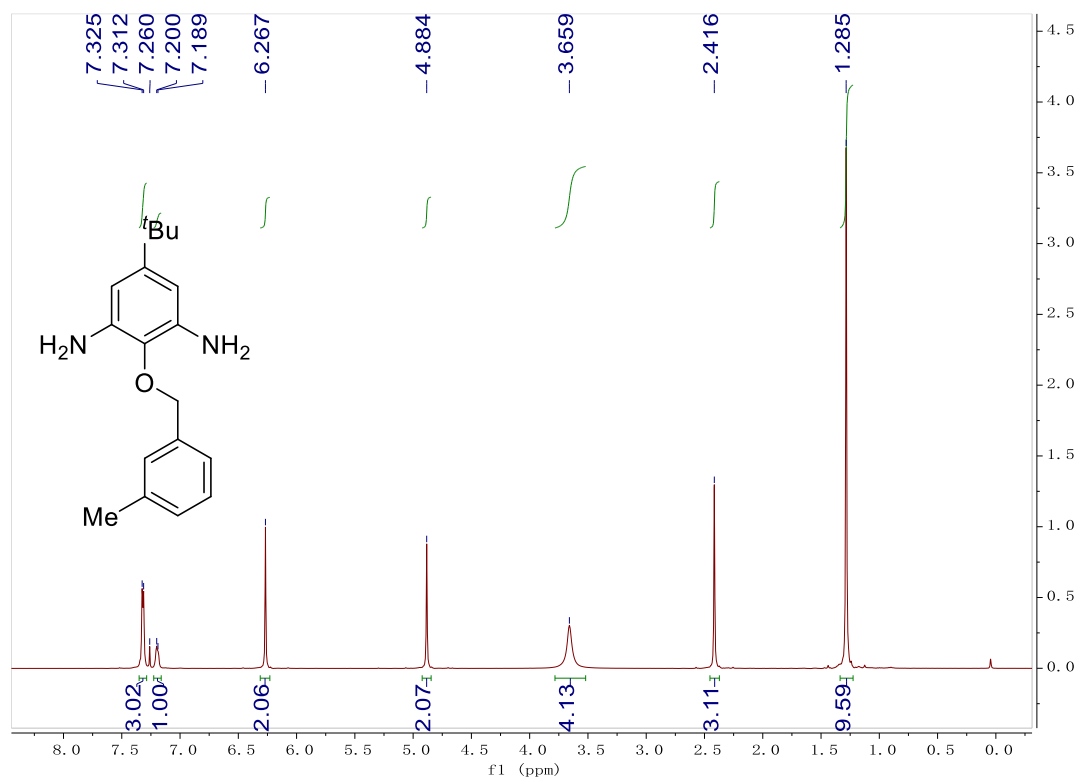

$^{13}\text{C}$  NMR spectrum of *Monomer-C1* in  $\text{CDCl}_3$  at 298 K

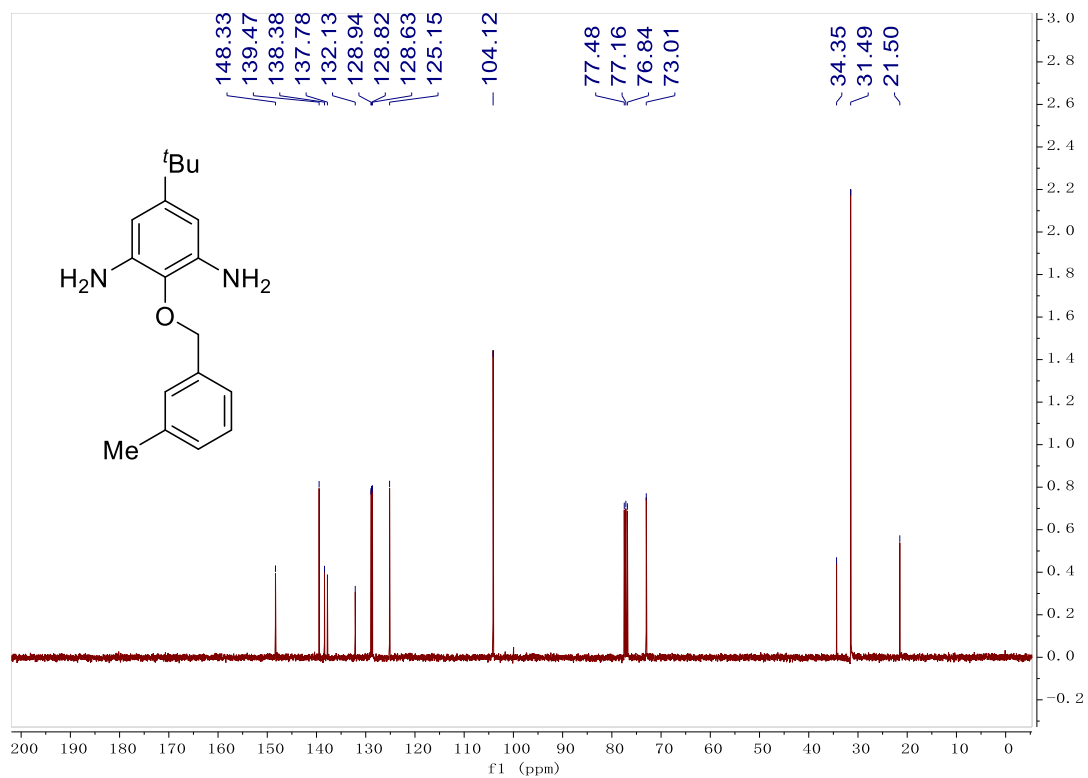

$^1\text{H}$  NMR spectrum of *Monomer-C2* in  $\text{CDCl}_3$  at 298 K

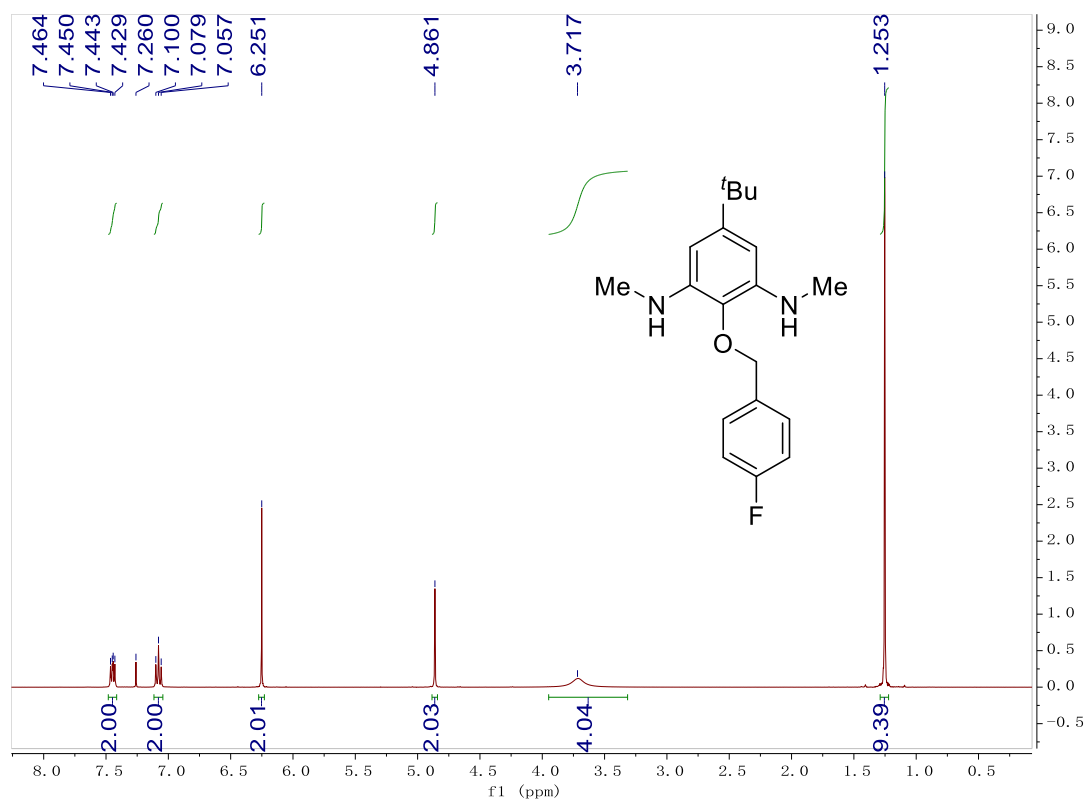

$^{13}\text{C}$  NMR spectrum of *Monomer-C2* in  $\text{CDCl}_3$  at 298 K

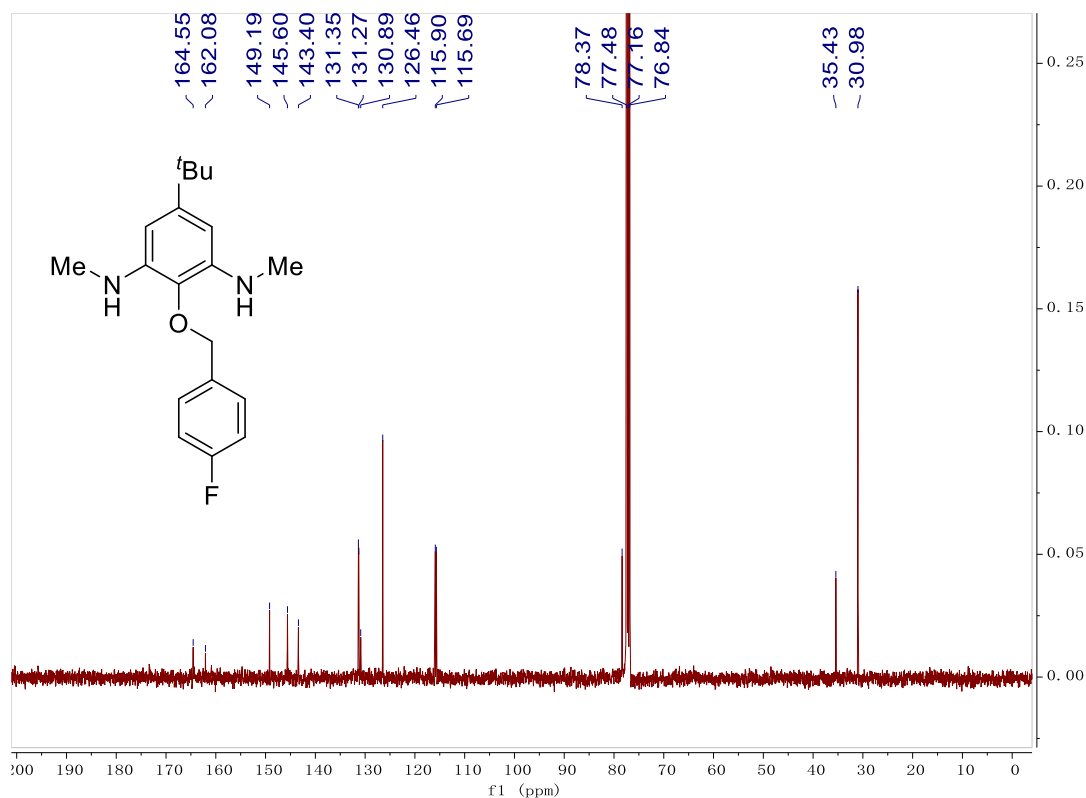

$^1\text{H}$  NMR spectrum of *Monomer-C3* in  $\text{CDCl}_3$  at 298 K

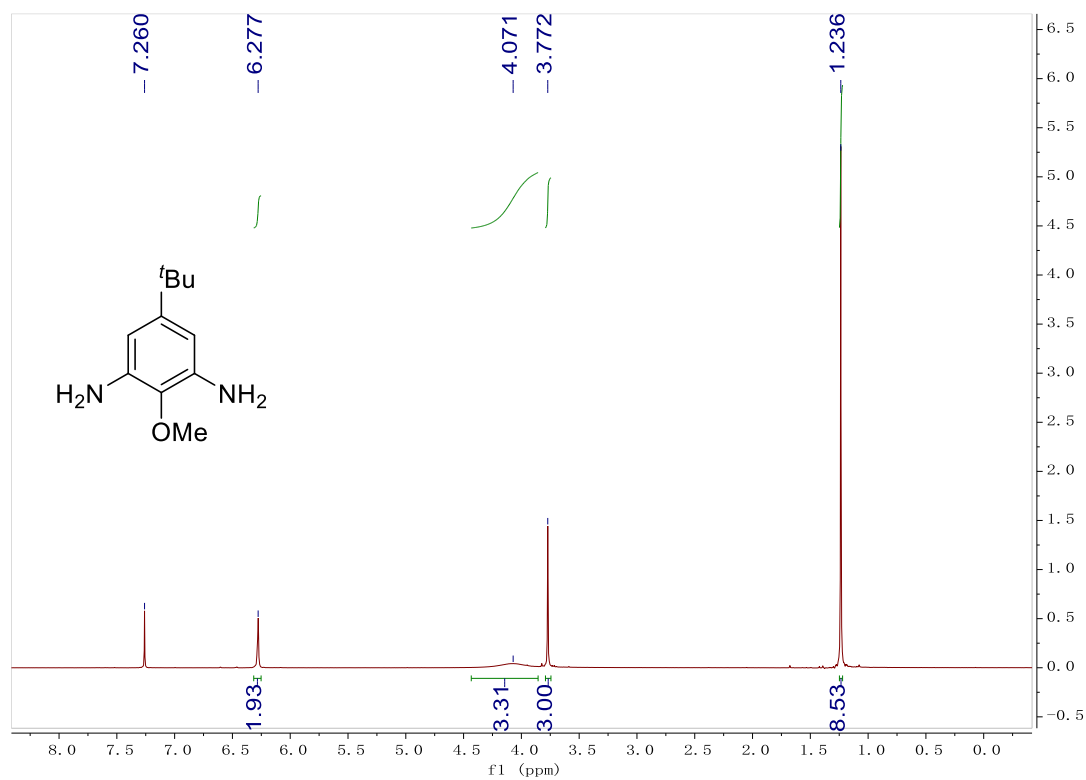

$^{13}\text{C}$  NMR spectrum of *Monomer-C3* in  $\text{CDCl}_3$  at 298 K

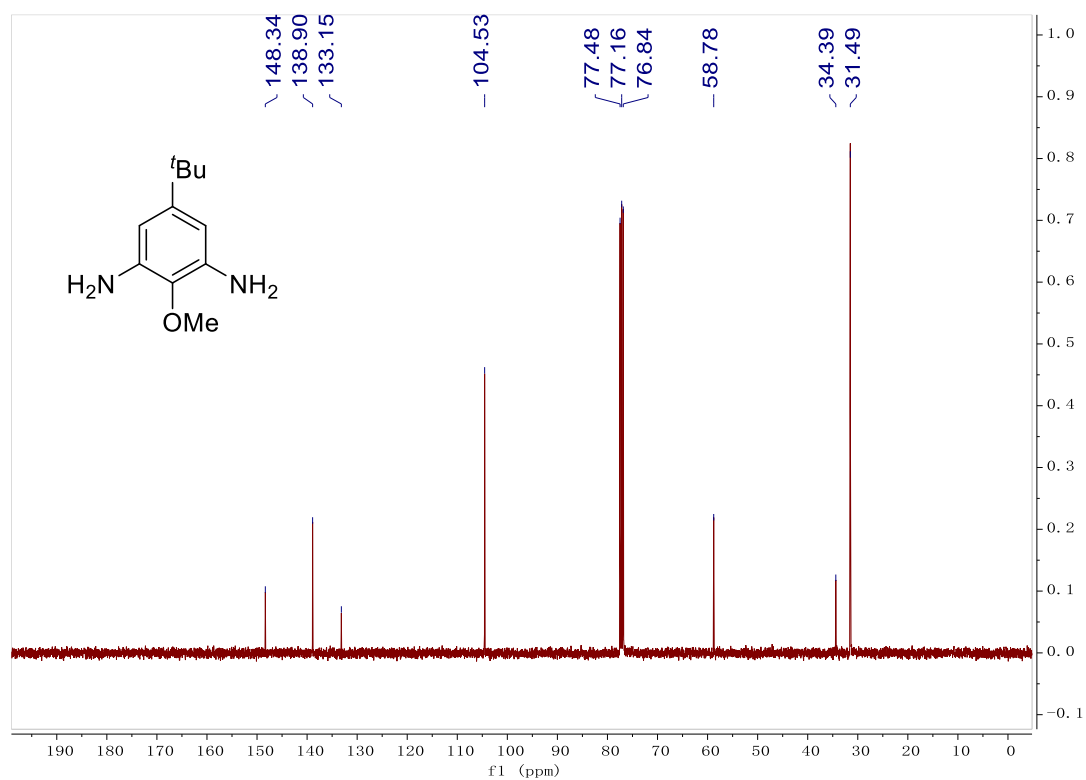

$^1\text{H}$  NMR spectrum of *Monomer-C4* in  $\text{CDCl}_3$  at 298 K

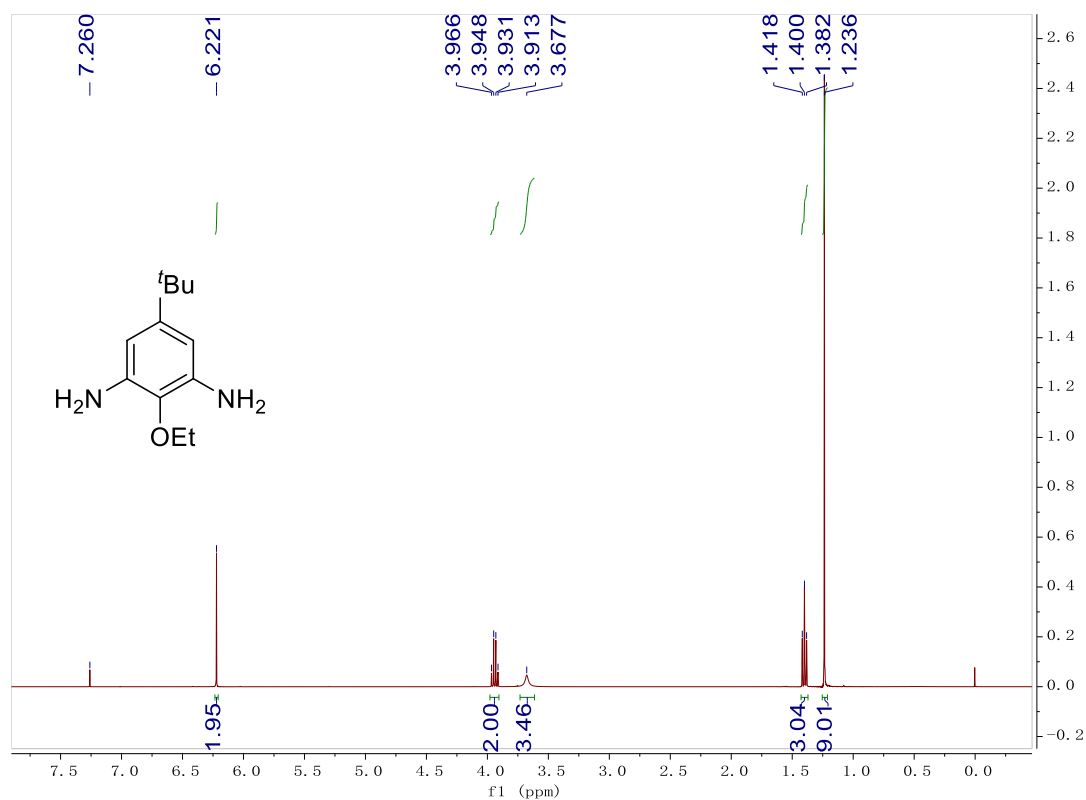

$^{13}\text{C}$  NMR spectrum of *Monomer-C4* in  $\text{CDCl}_3$  at 298 K

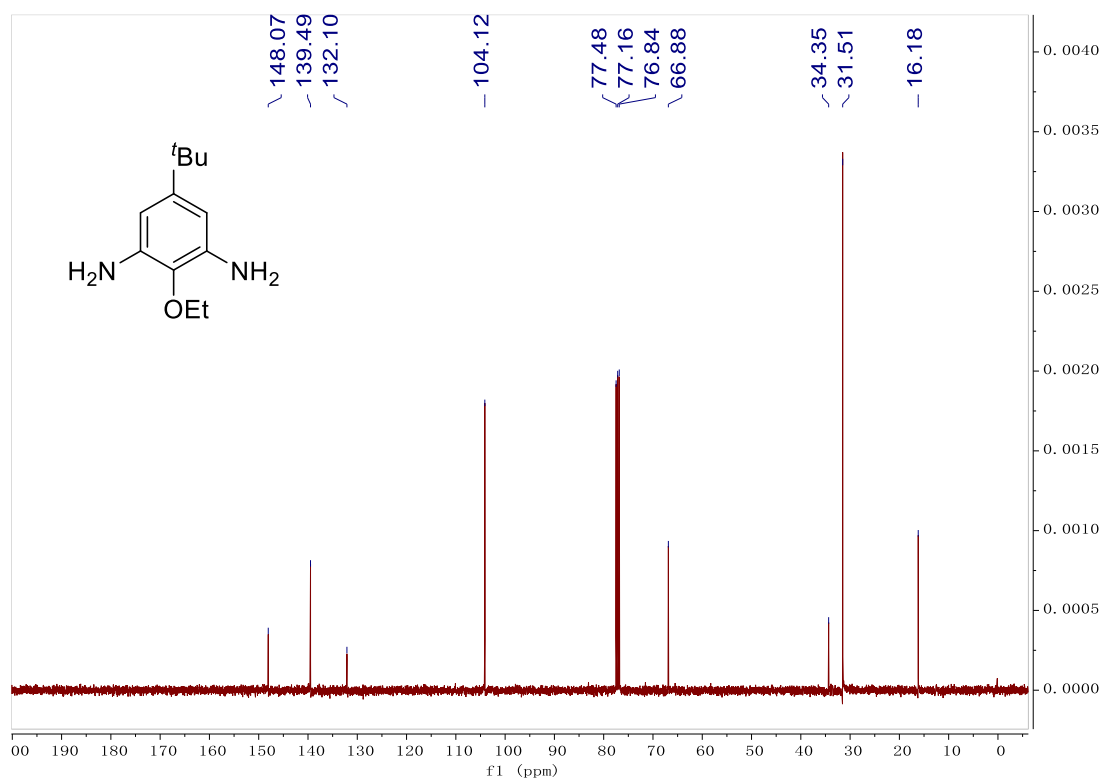

$^1\text{H}$  NMR spectrum of *Monomer-F1* in  $\text{CDCl}_3$  at 298 K

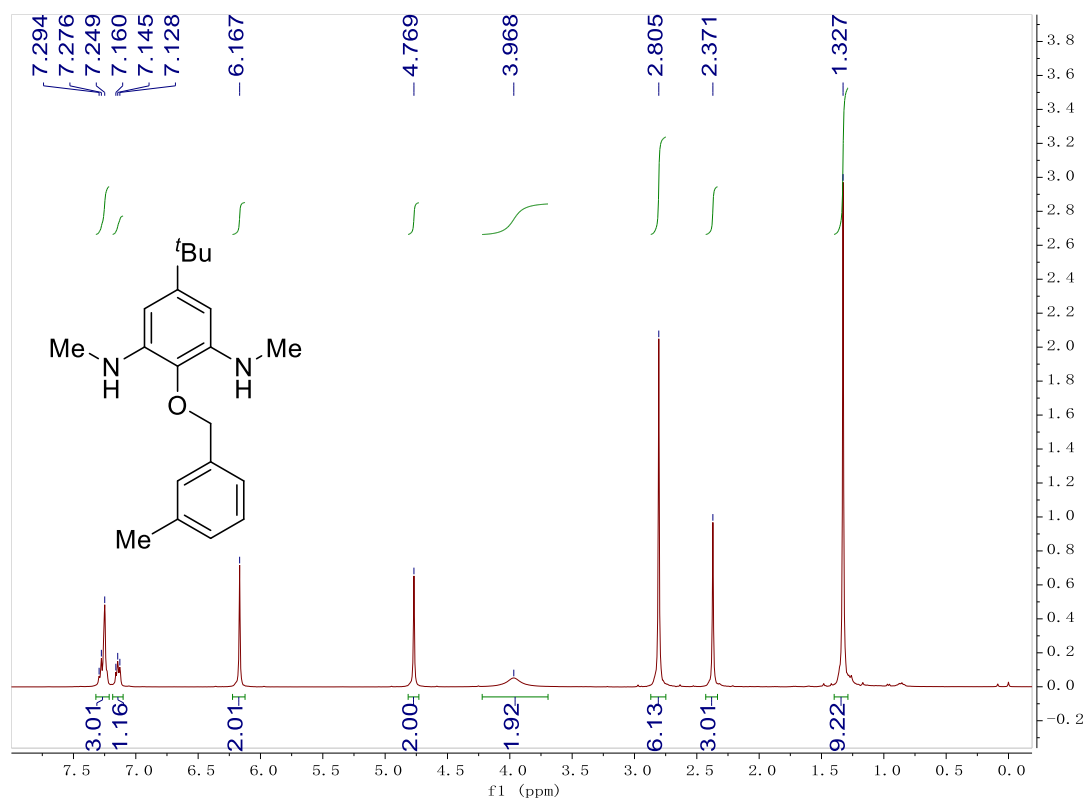

$^{13}\text{C}$  NMR spectrum of *Monomer-F1* in  $\text{CDCl}_3$  at 298 K

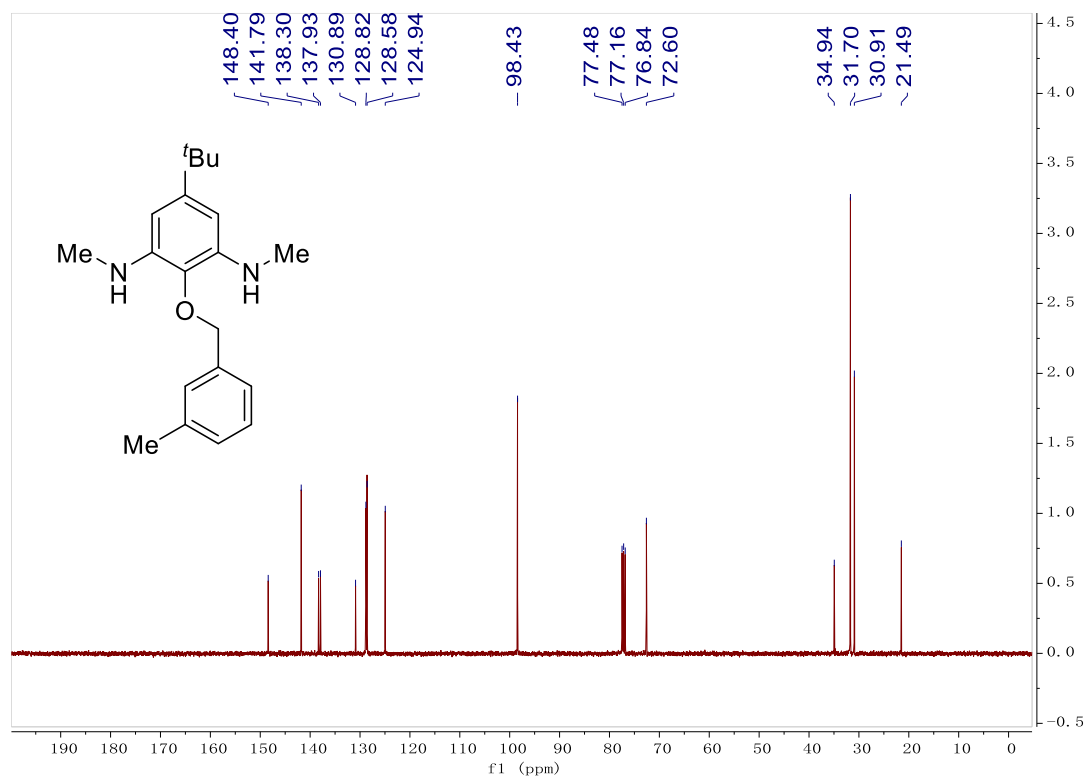



$^1\text{H}$  NMR spectrum of *Monomer-F2* in  $\text{CDCl}_3$  at 298 K

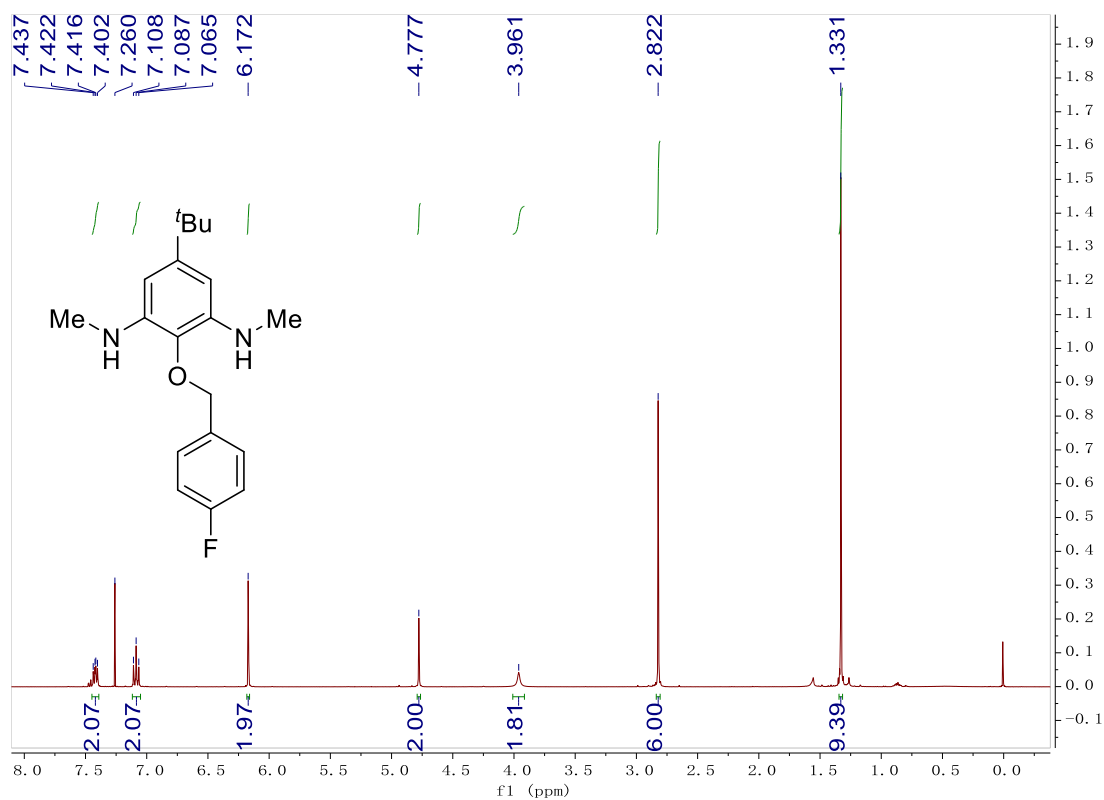

$^{13}\text{C}$  NMR spectrum of *Monomer-F2* in  $\text{CDCl}_3$  at 298 K

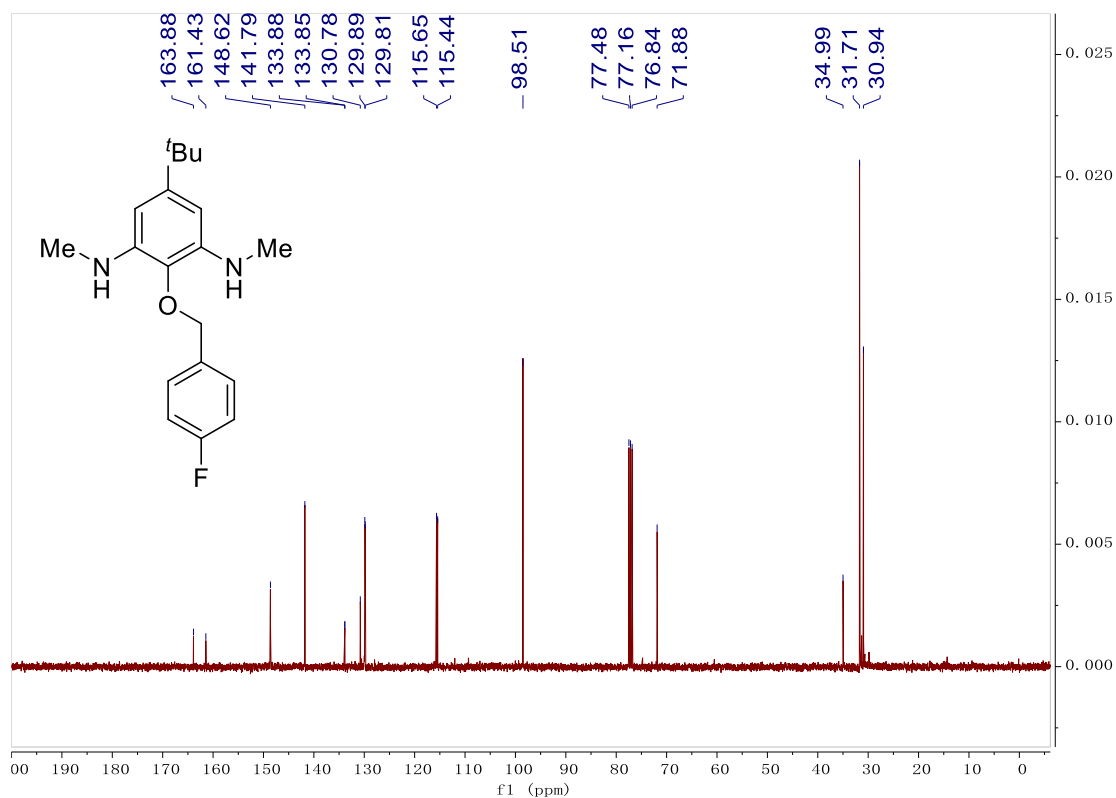

$^1\text{H}$  NMR spectrum of *Monomer-F3* in  $\text{CDCl}_3$  at 298 K

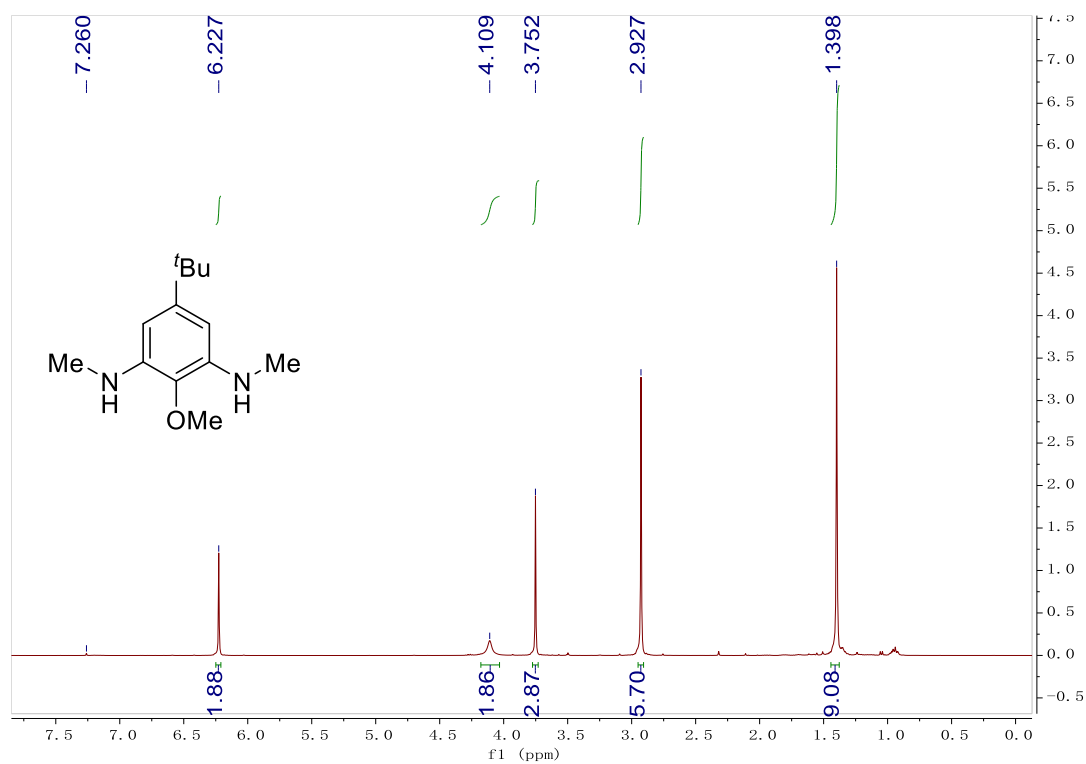

$^{13}\text{C}$  NMR spectrum of *Monomer-F3* in  $\text{CDCl}_3$  at 298 K

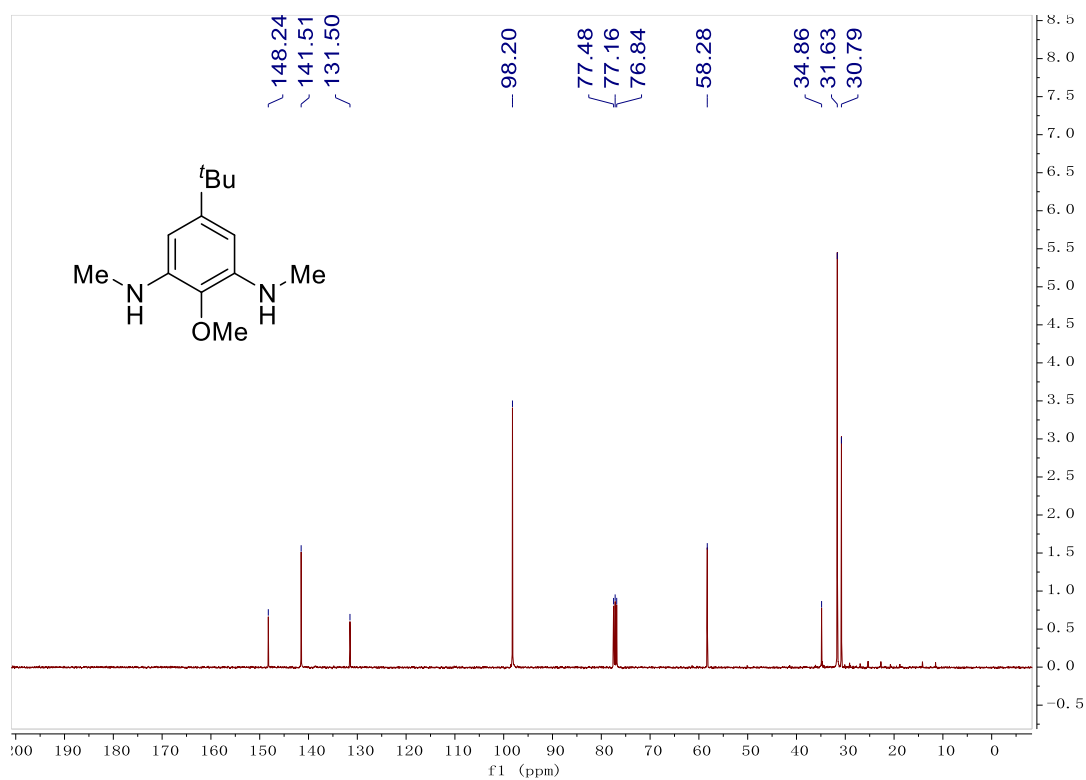

$^1\text{H}$  NMR spectrum of *Monomer-F4* in  $\text{CDCl}_3$  at 298 K

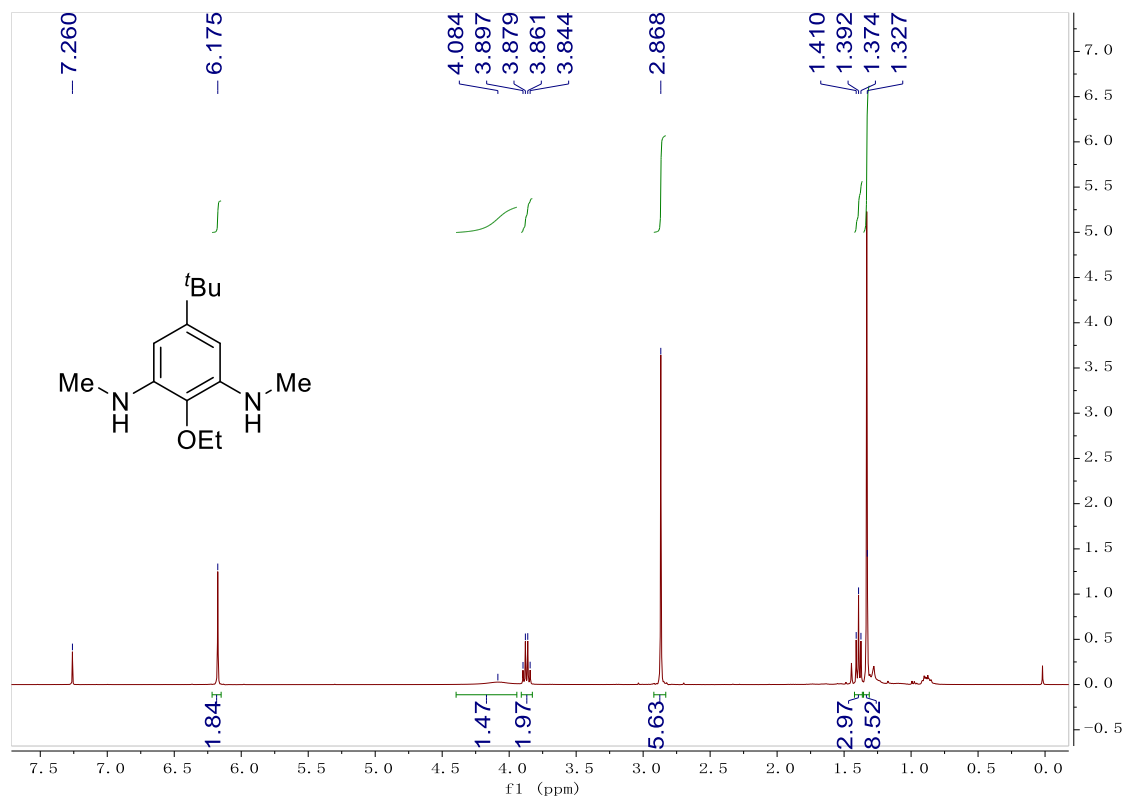

$^{13}\text{C}$  NMR spectrum of *Monomer-F4* in  $\text{CDCl}_3$  at 298 K

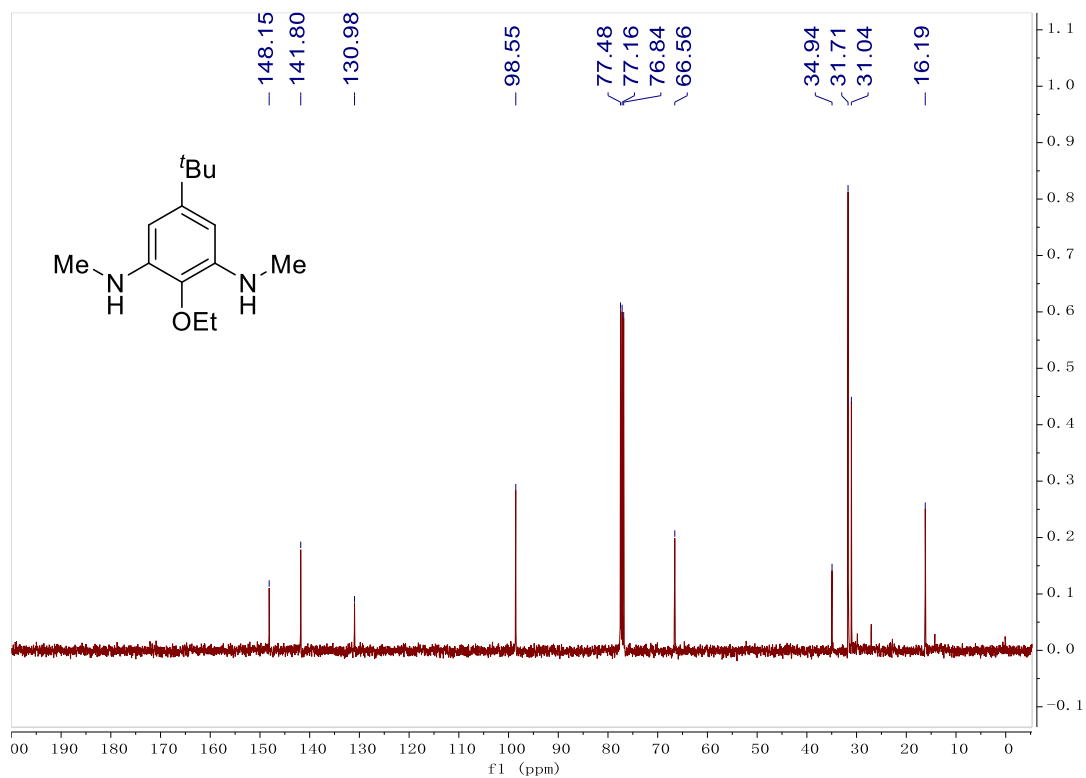

$^1\text{H}$  NMR spectrum of *Monomer-F5* in  $\text{CDCl}_3$  at 298 K

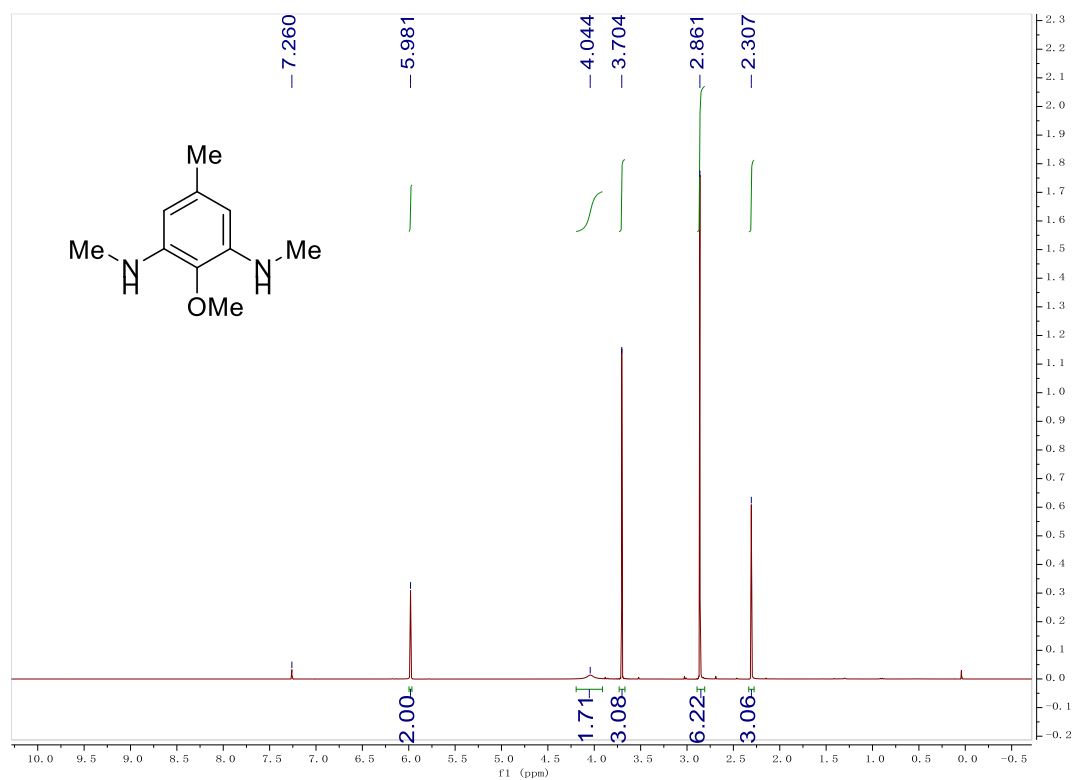

$^{13}\text{C}$  NMR spectrum of *Monomer-F5* in  $\text{CDCl}_3$  at 298 K

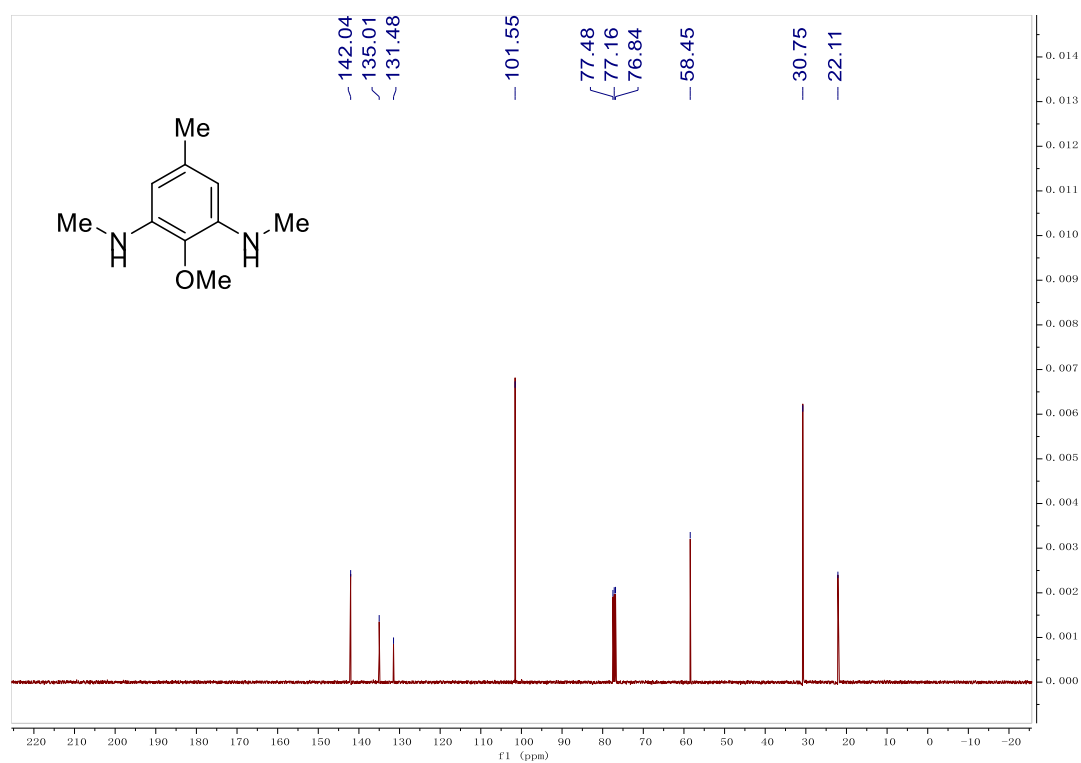

$^1\text{H}$  NMR spectrum of *Monomer-H1* in  $\text{CDCl}_3$  at 298 K

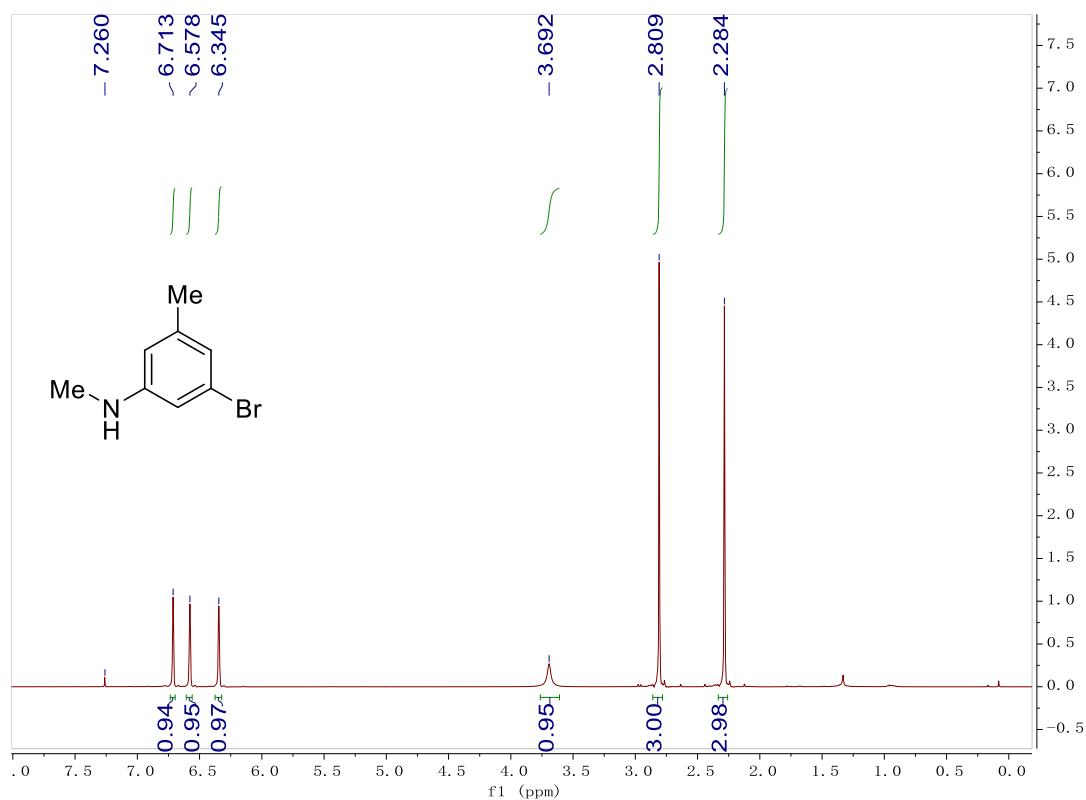

$^{13}\text{C}$  NMR spectrum of *Monomer-H1* in  $\text{CDCl}_3$  at 298 K

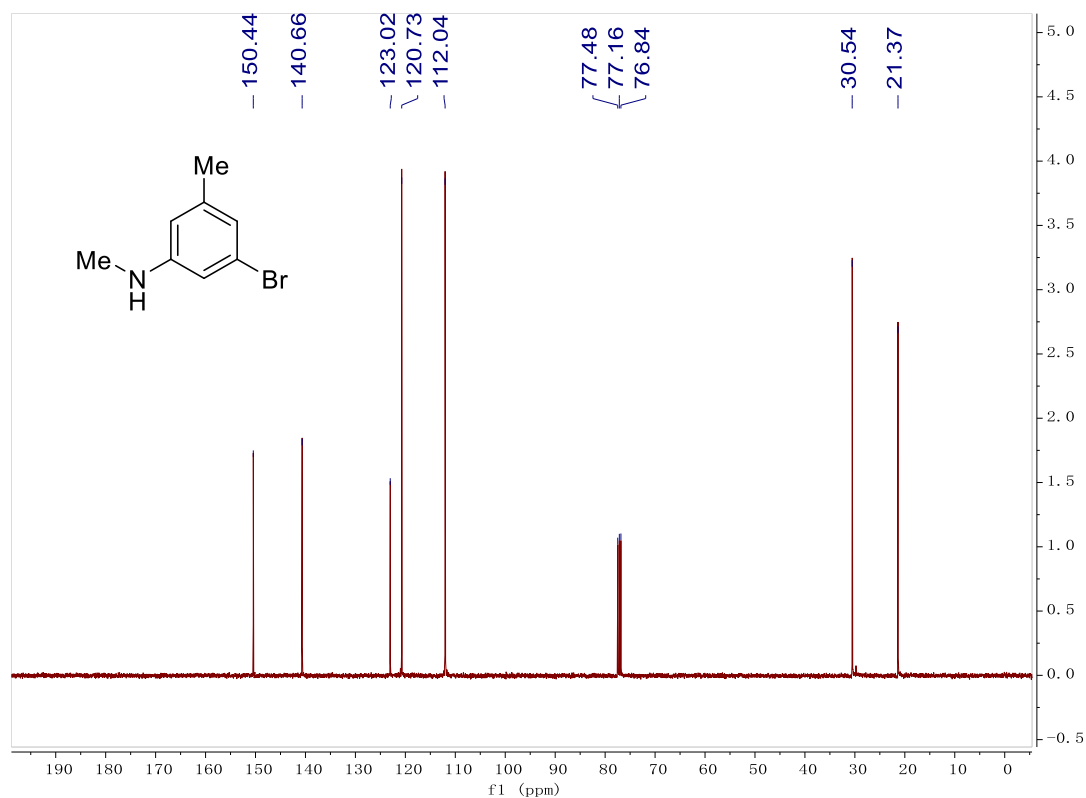

$^1\text{H}$  NMR spectrum of *Monomer-H2* in  $\text{CDCl}_3$  at 298 K

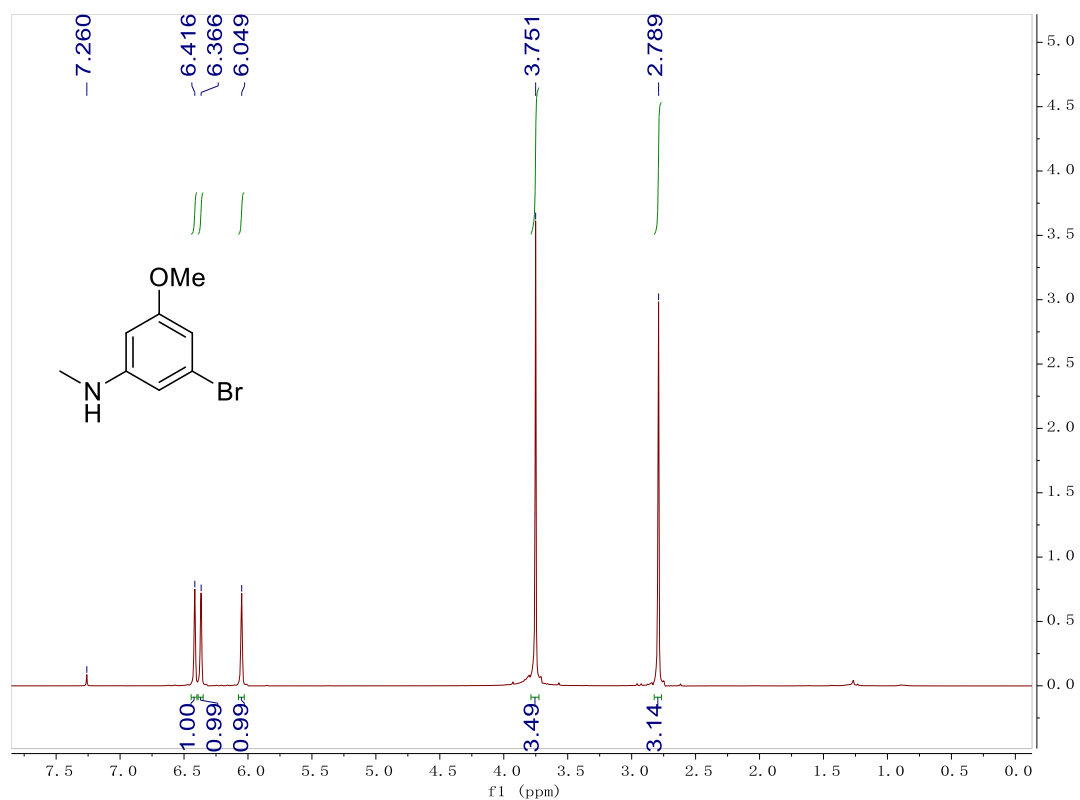

$^{13}\text{C}$  NMR spectrum of *Monomer-H2* in  $\text{CDCl}_3$  at 298 K

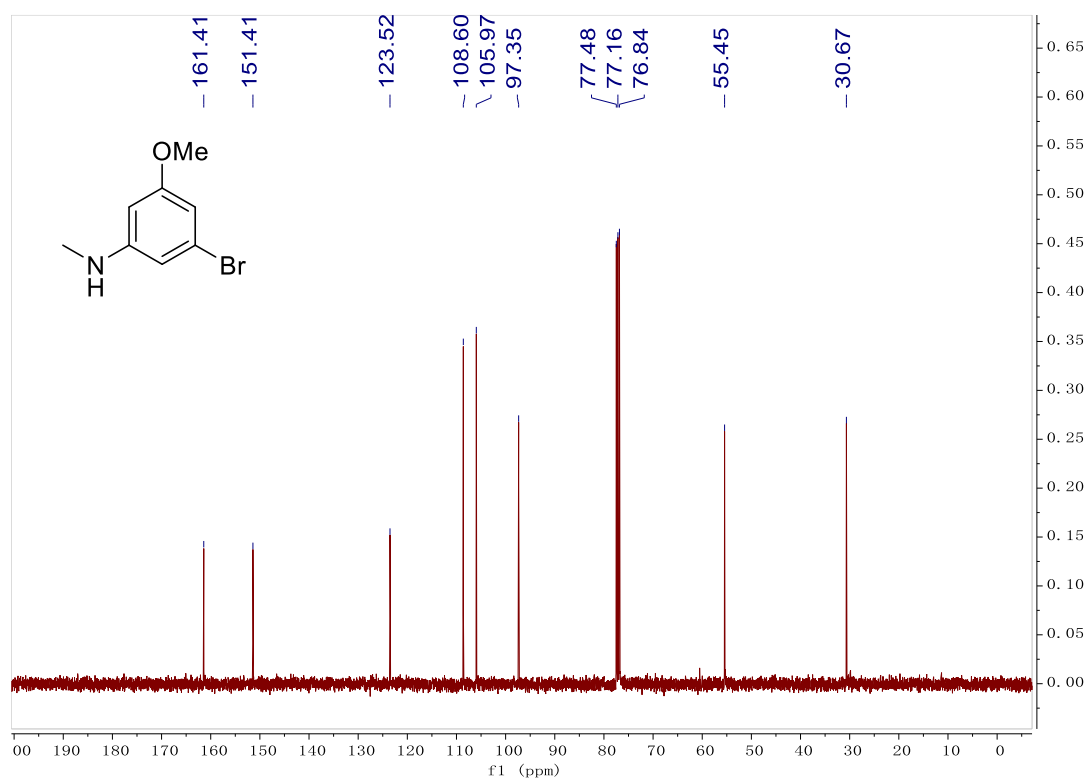

$^1\text{H}$  NMR spectrum of *Monomer-I1* in  $\text{CDCl}_3$  at 298 K

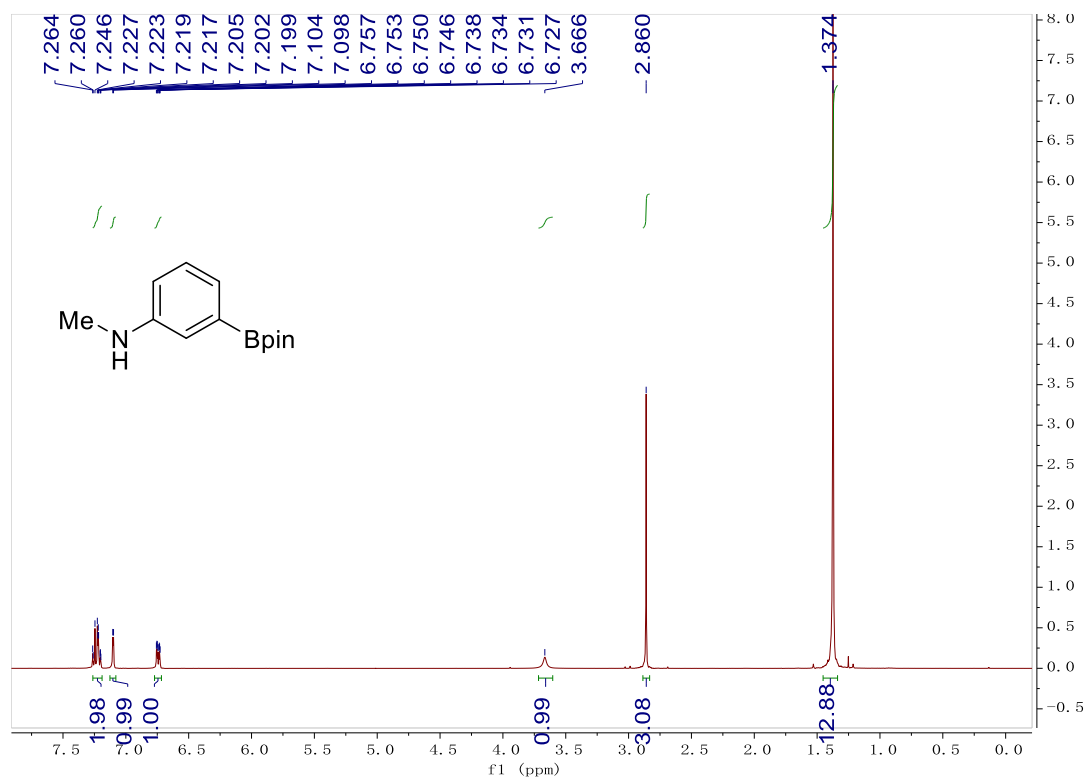

$^{13}\text{C}$  NMR spectrum of *Monomer-I1* in  $\text{CDCl}_3$  at 298 K

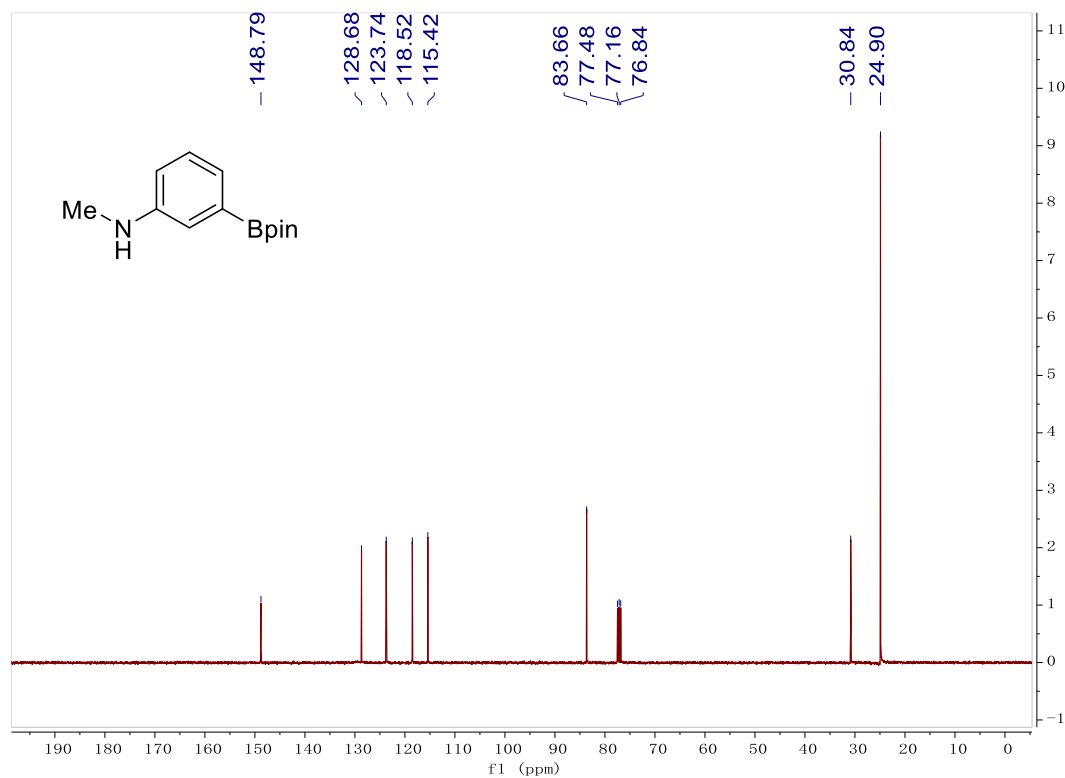

$^1\text{H}$  NMR spectrum of *Monomer-12* in  $\text{CDCl}_3$  at 298 K

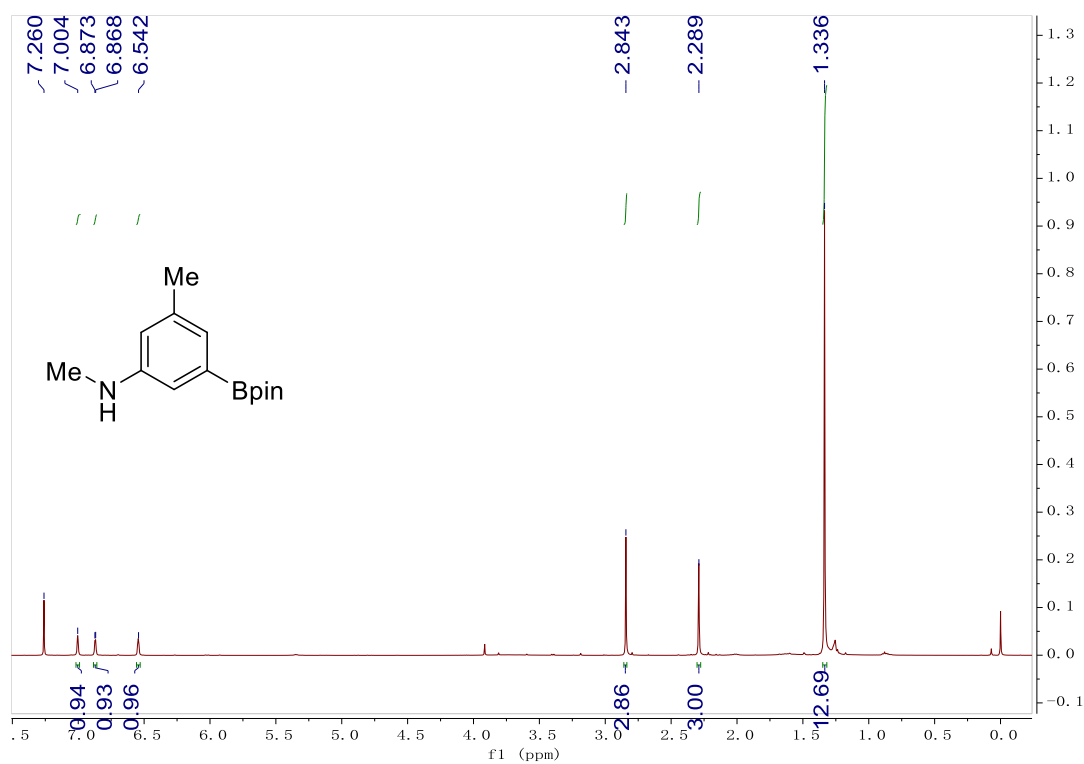

$^{13}\text{C}$  NMR spectrum of *Monomer-12* in  $\text{CDCl}_3$  at 298 K

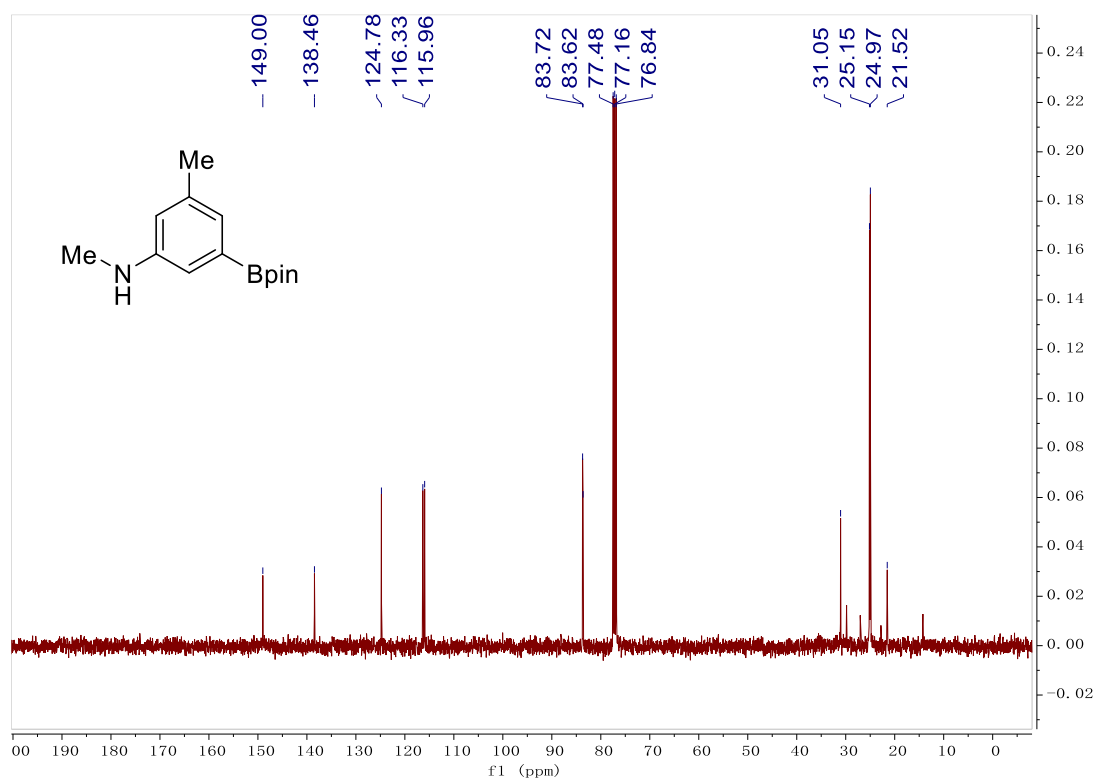



$^1\text{H}$  NMR spectrum of *Monomer-13* in  $\text{CDCl}_3$  at 298 K

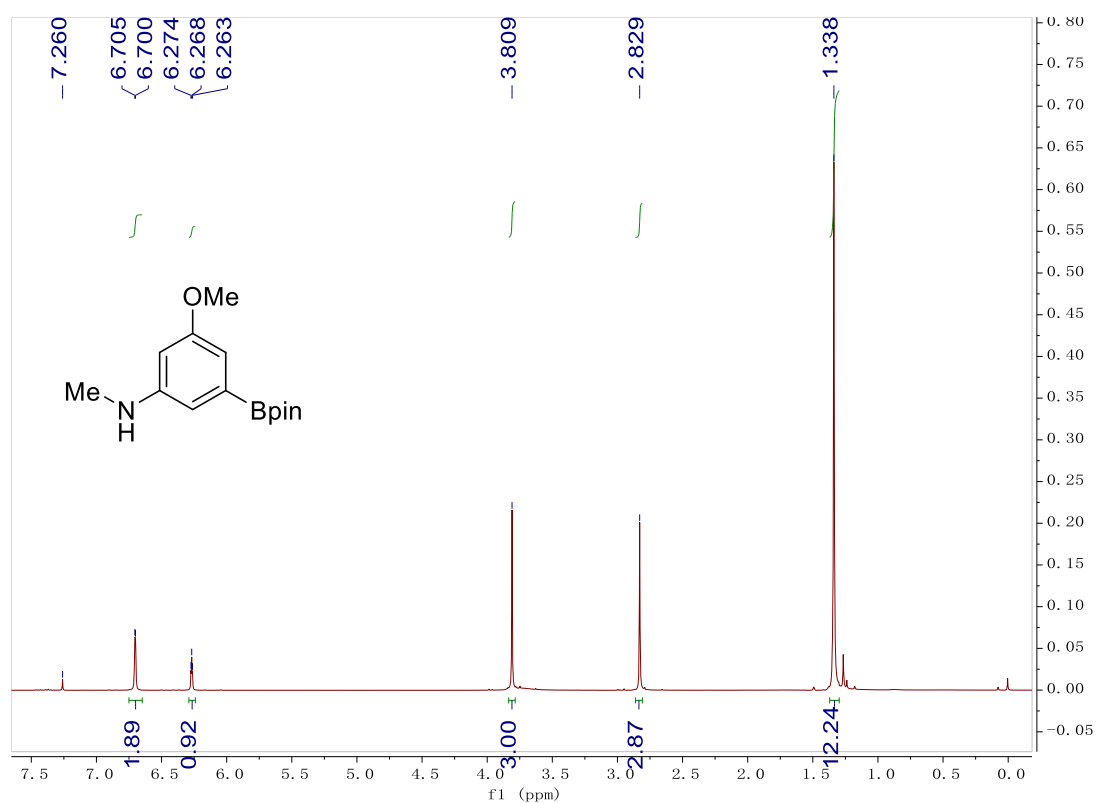

$^{13}\text{C}$  NMR spectrum of *Monomer-13* in  $\text{CDCl}_3$  at 298 K

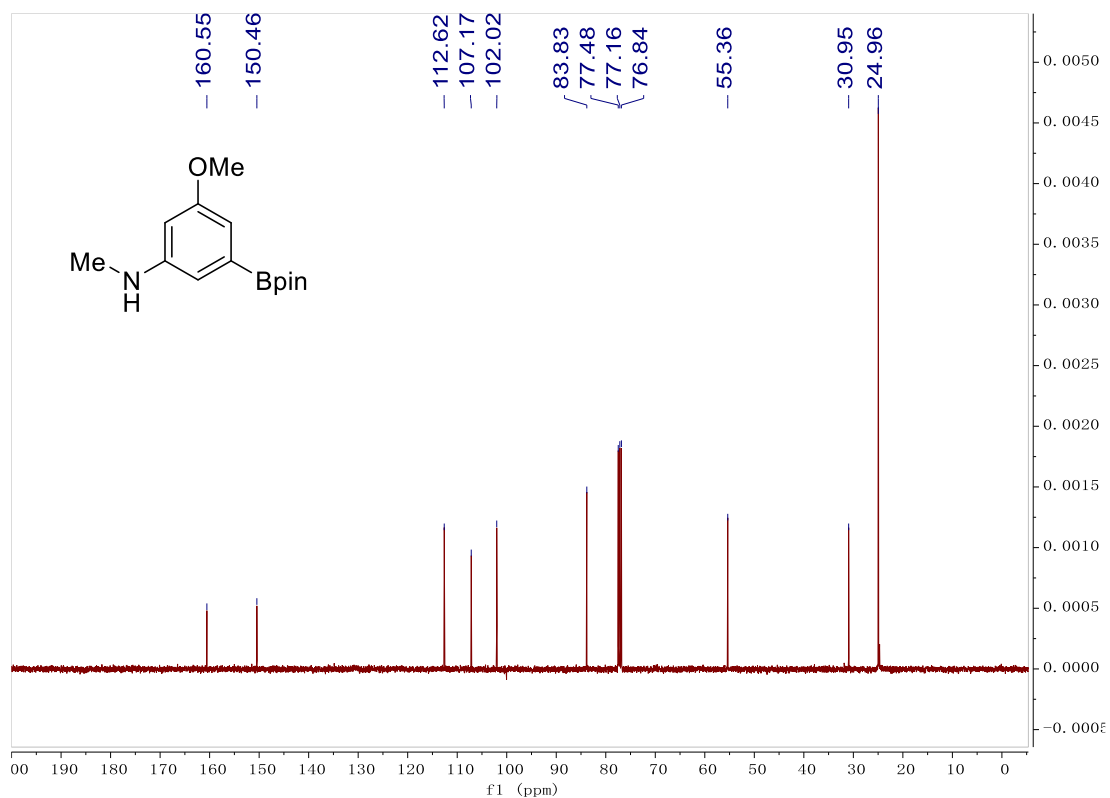

$^1\text{H}$  NMR spectrum of *Monomer-I4* in  $\text{CDCl}_3$  at 298 K

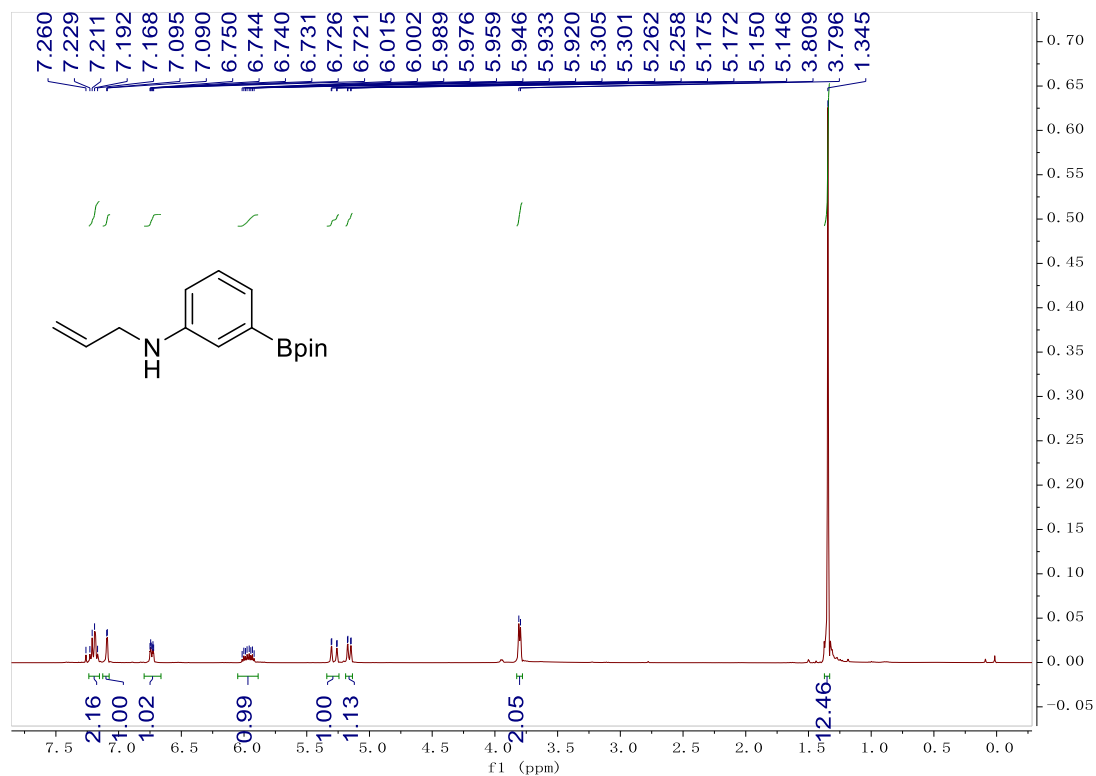

$^{13}\text{C}$  NMR spectrum of *Monomer-I4* in  $\text{CDCl}_3$  at 298 K

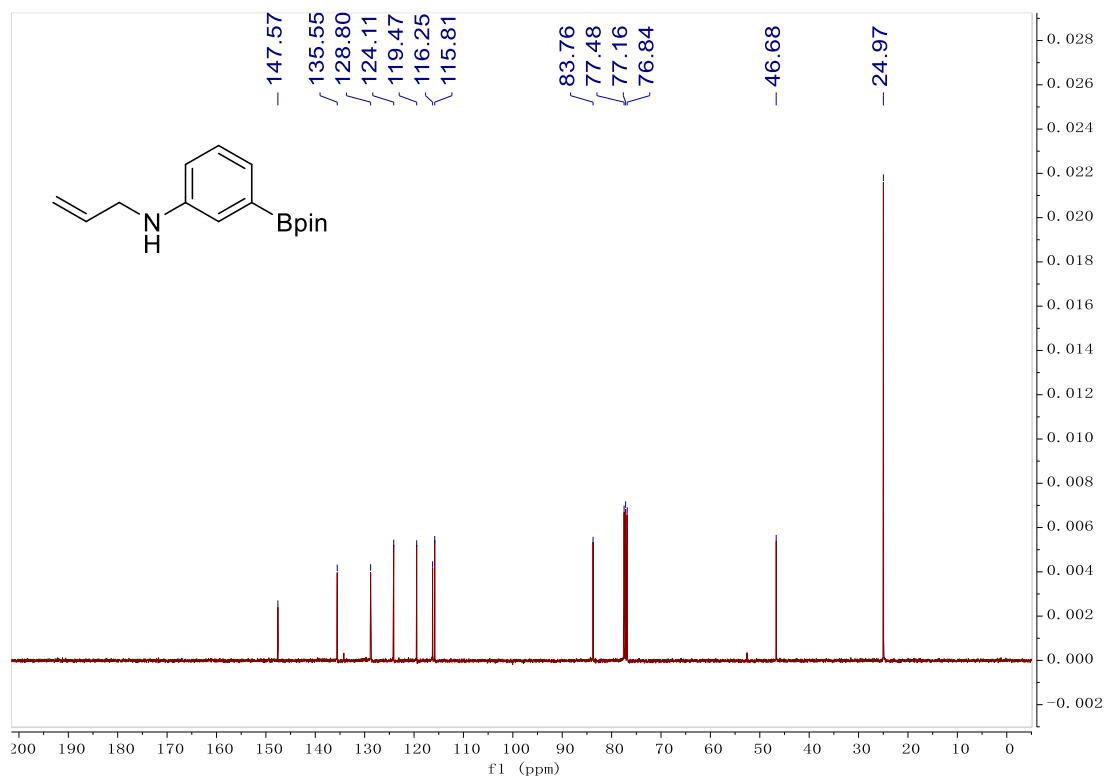

$^1\text{H}$  NMR spectrum of **6a** in  $\text{CDCl}_3$  at 333 K

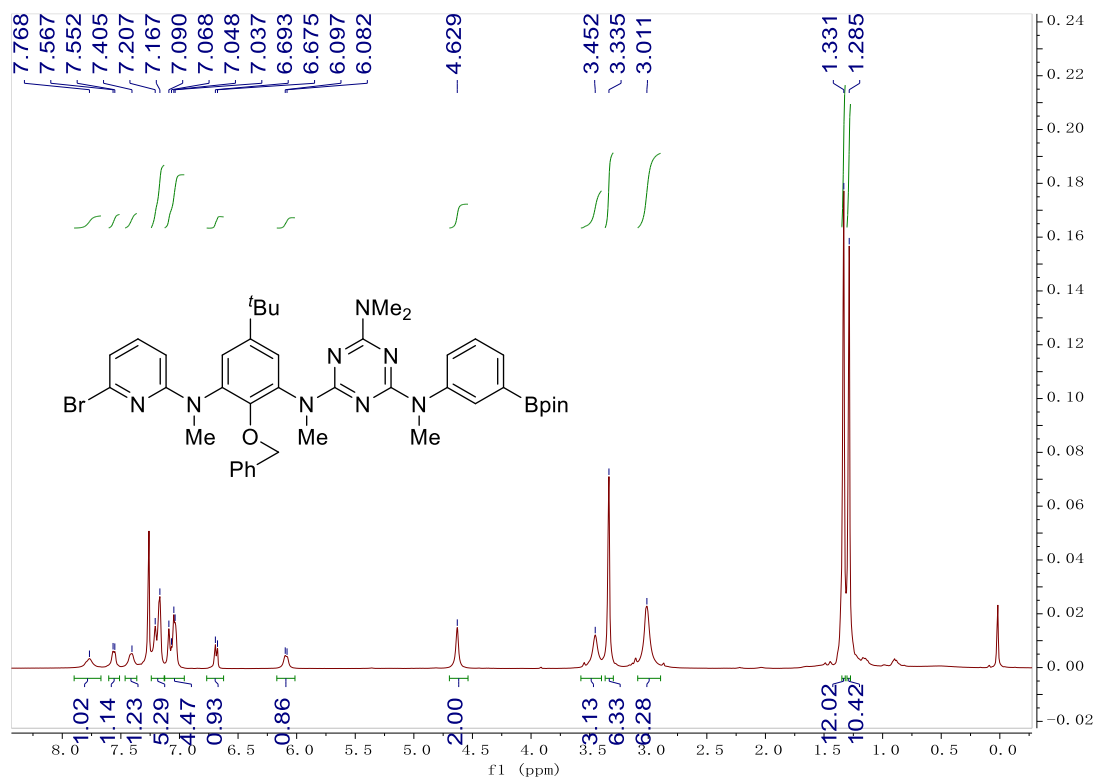

$^{13}\text{C}$  NMR spectrum of **6a** in  $\text{CDCl}_3$  at 333 K

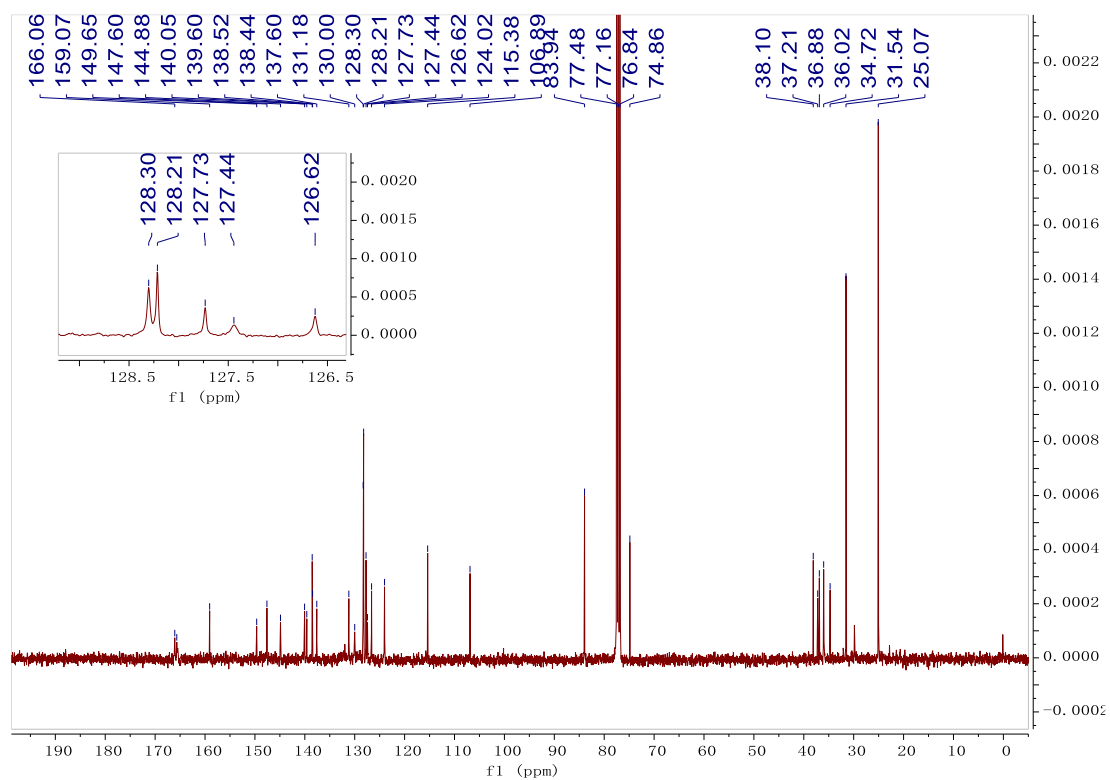

$^1\text{H}$  NMR spectrum of **6b** in  $\text{CDCl}_3$  at 333 K

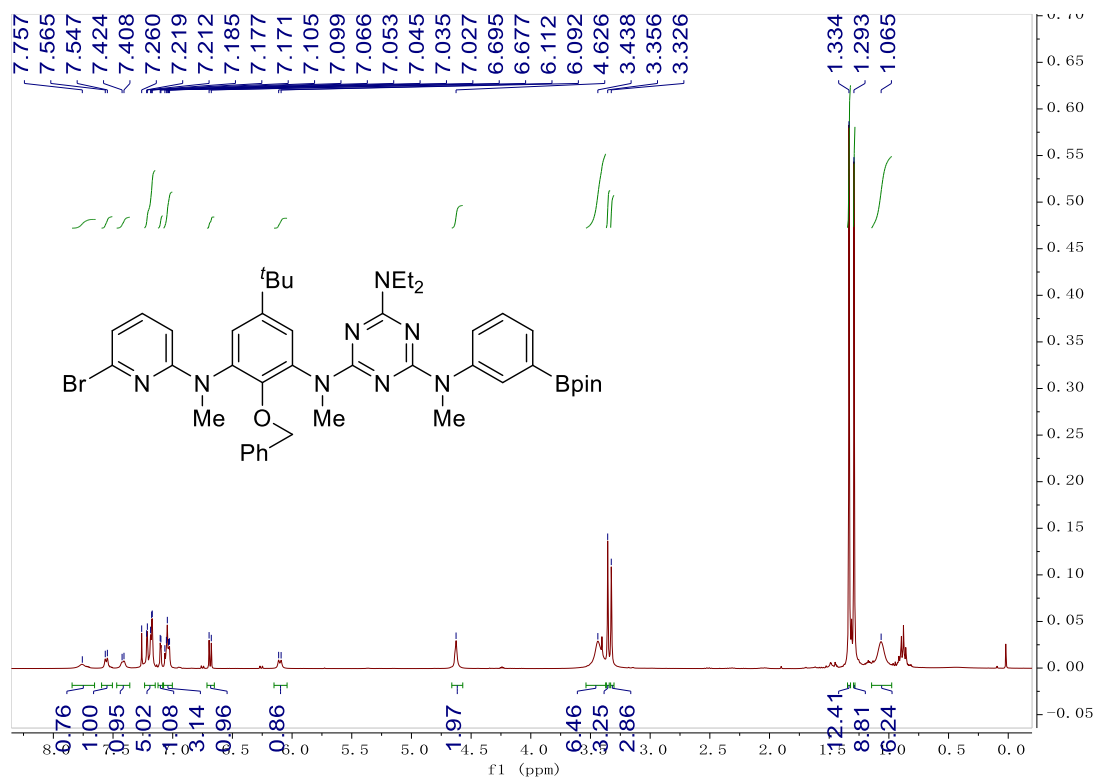

$^{13}\text{C}$  NMR spectrum of **6b** in  $\text{CDCl}_3$  at 333 K

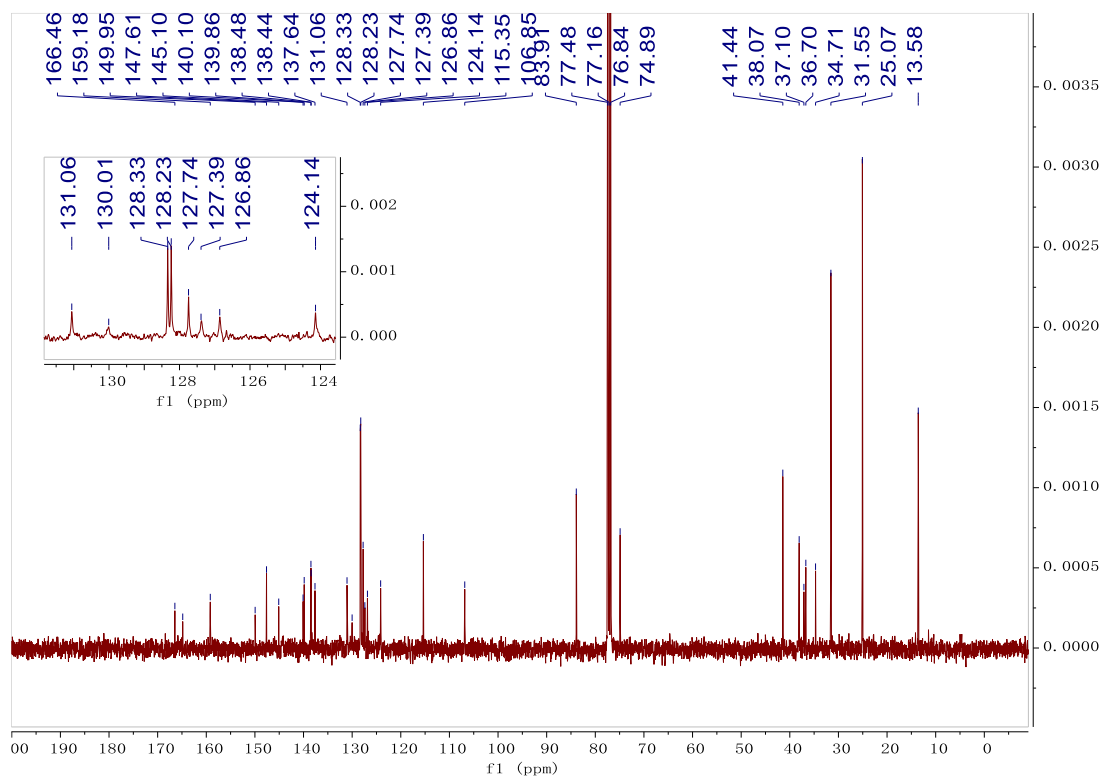

$^1\text{H}$  NMR spectrum of **6c** in  $\text{CDCl}_3$  at 333 K

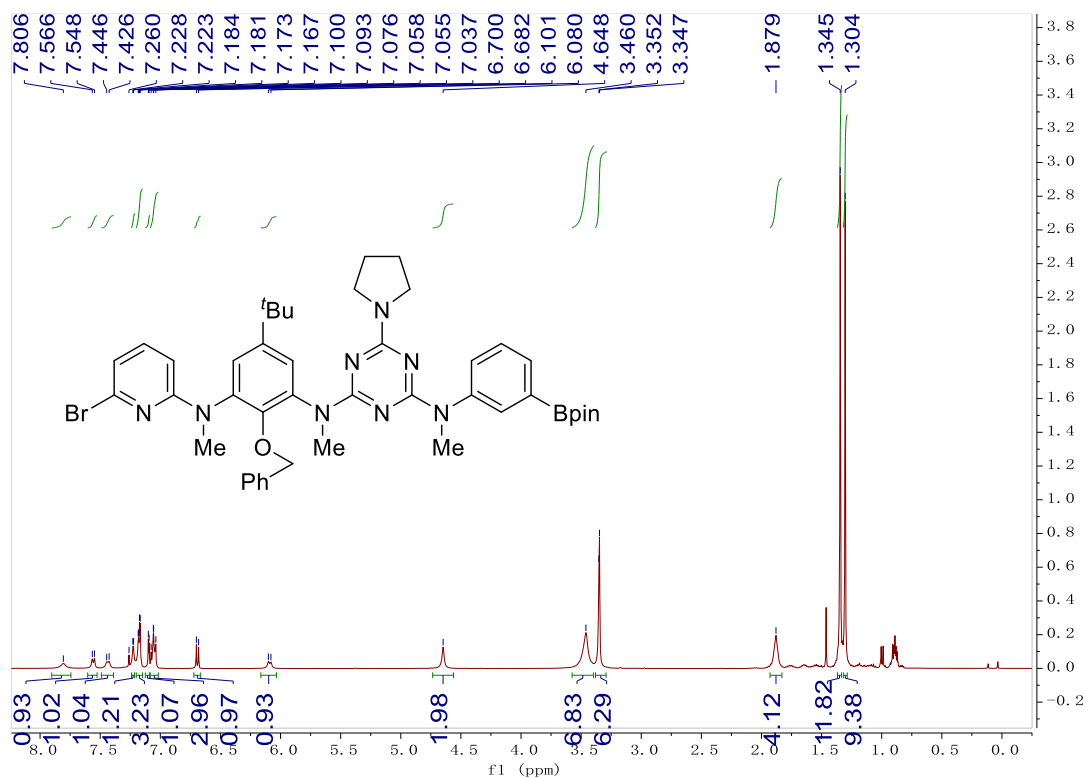

$^{13}\text{C}$  NMR spectrum of **6c** in  $\text{CDCl}_3$  at 333 K

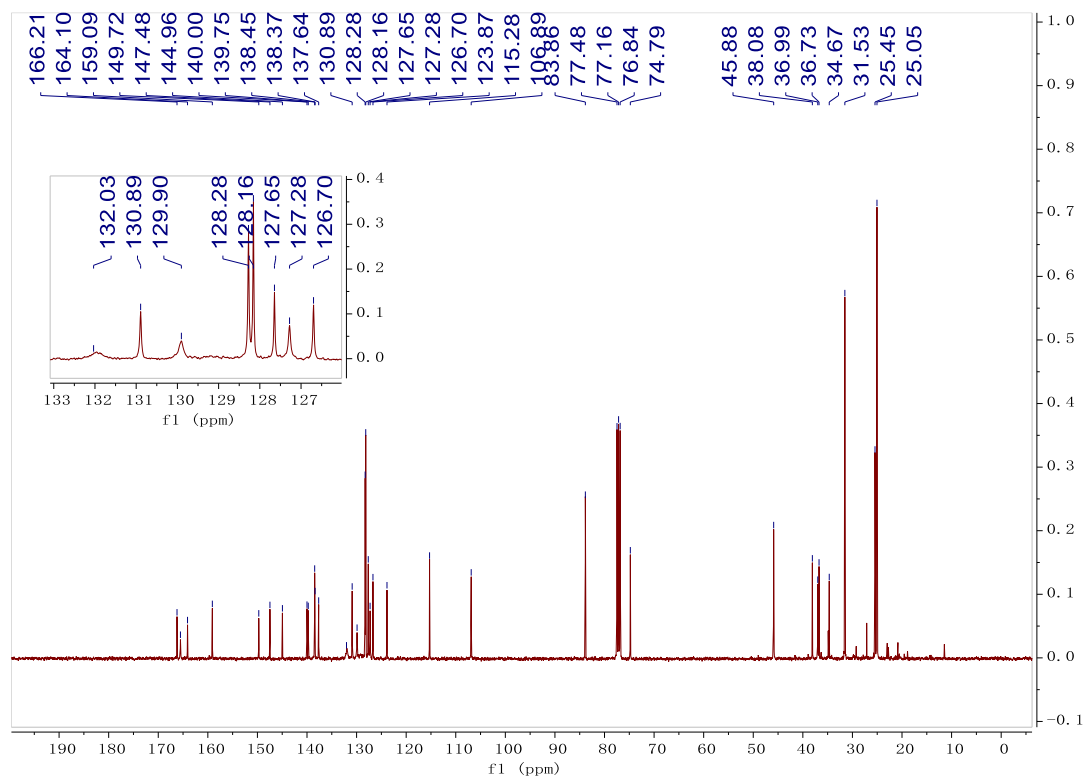

$^1\text{H}$  NMR spectrum of **6d** in  $\text{CDCl}_3$  at 333 K

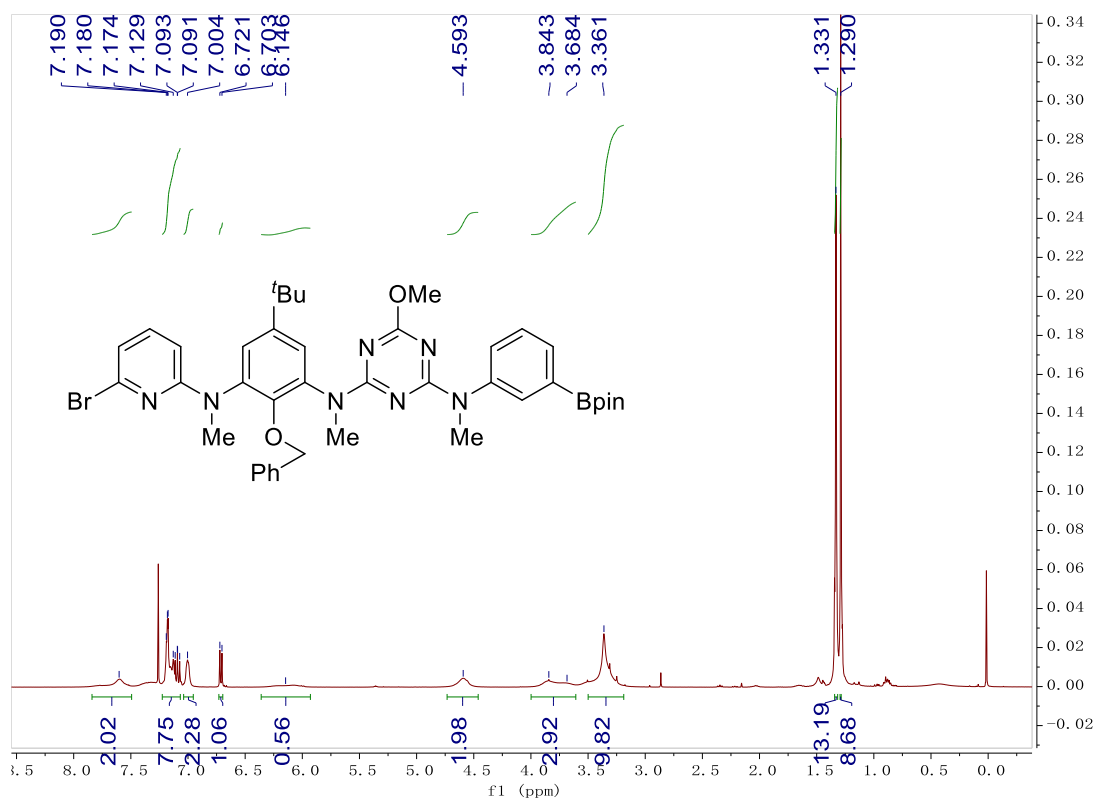

$^{13}\text{C}$  NMR spectrum of **6d** in  $\text{CDCl}_3$  at 333 K

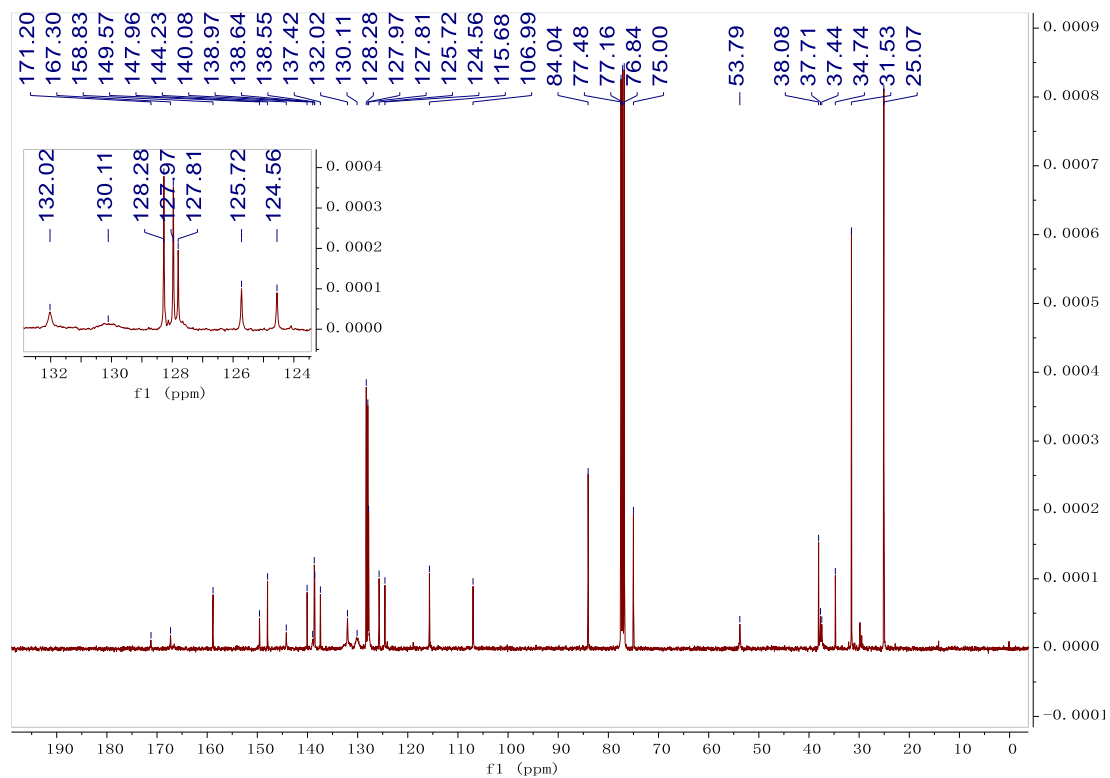

$^1\text{H}$  NMR spectrum of **6e** in  $\text{CDCl}_3$  at 333 K

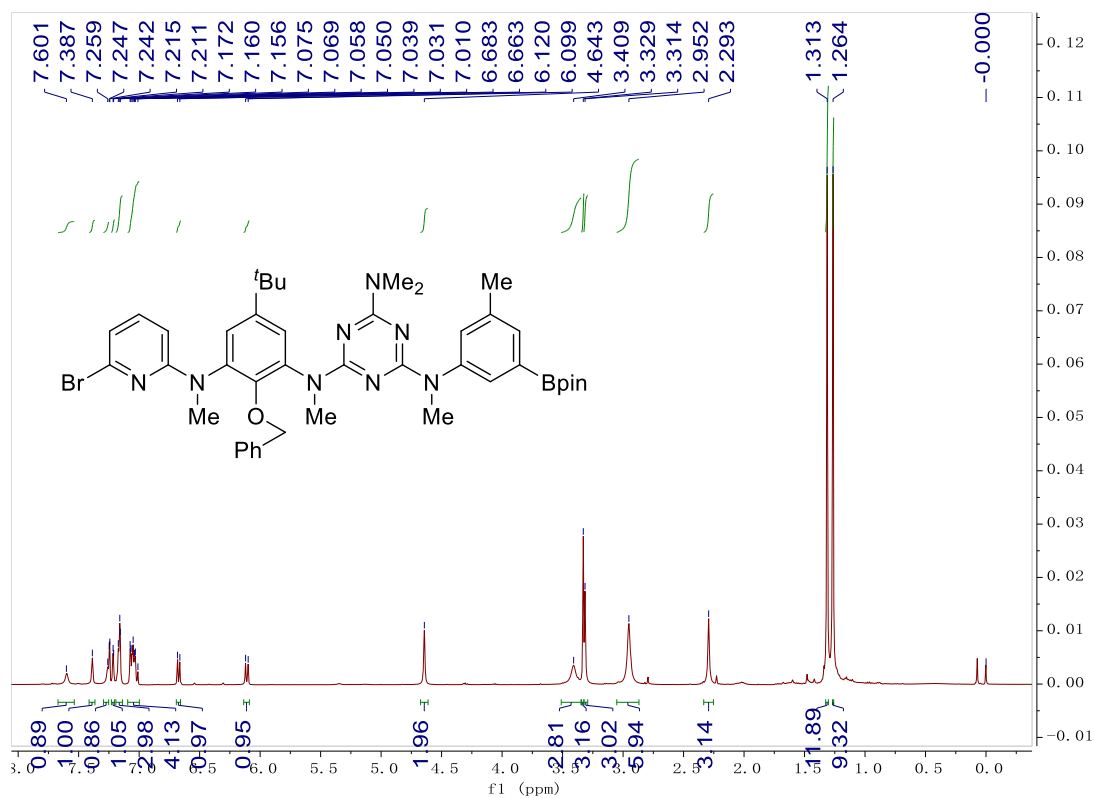

$^{13}\text{C}$  NMR spectrum of **6e** in  $\text{CDCl}_3$  at 333 K

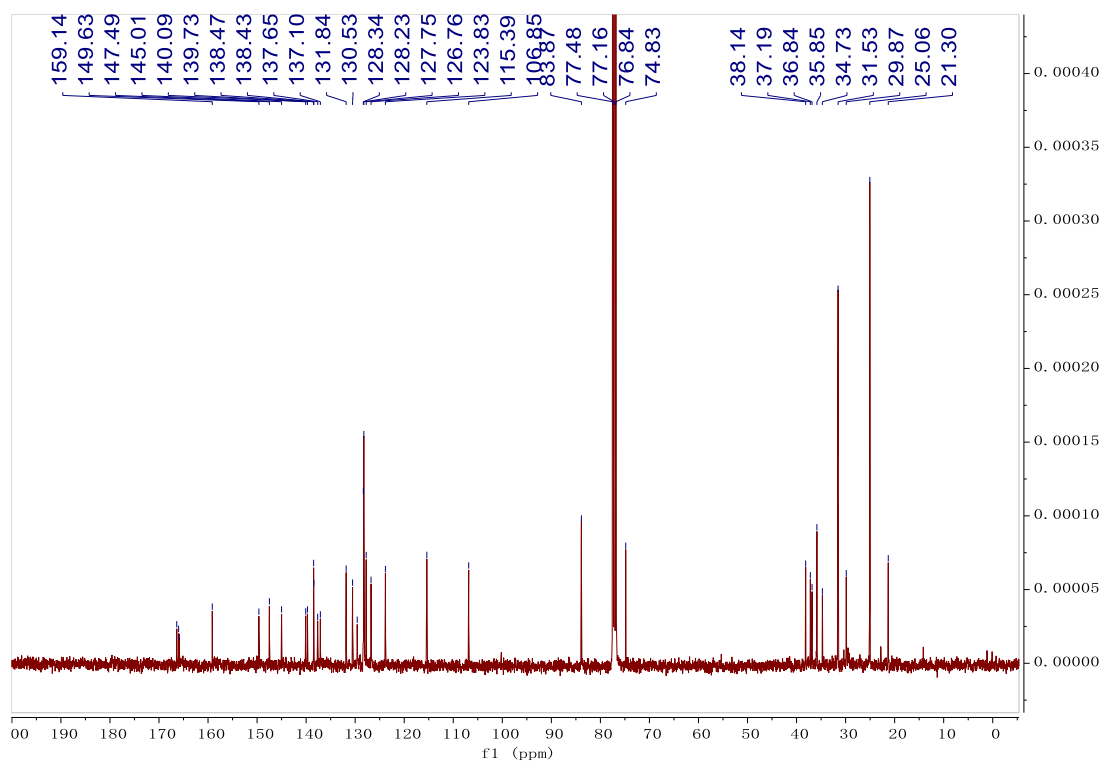

$^1\text{H}$  NMR spectrum of **6f** in  $\text{CDCl}_3$  at 333 K

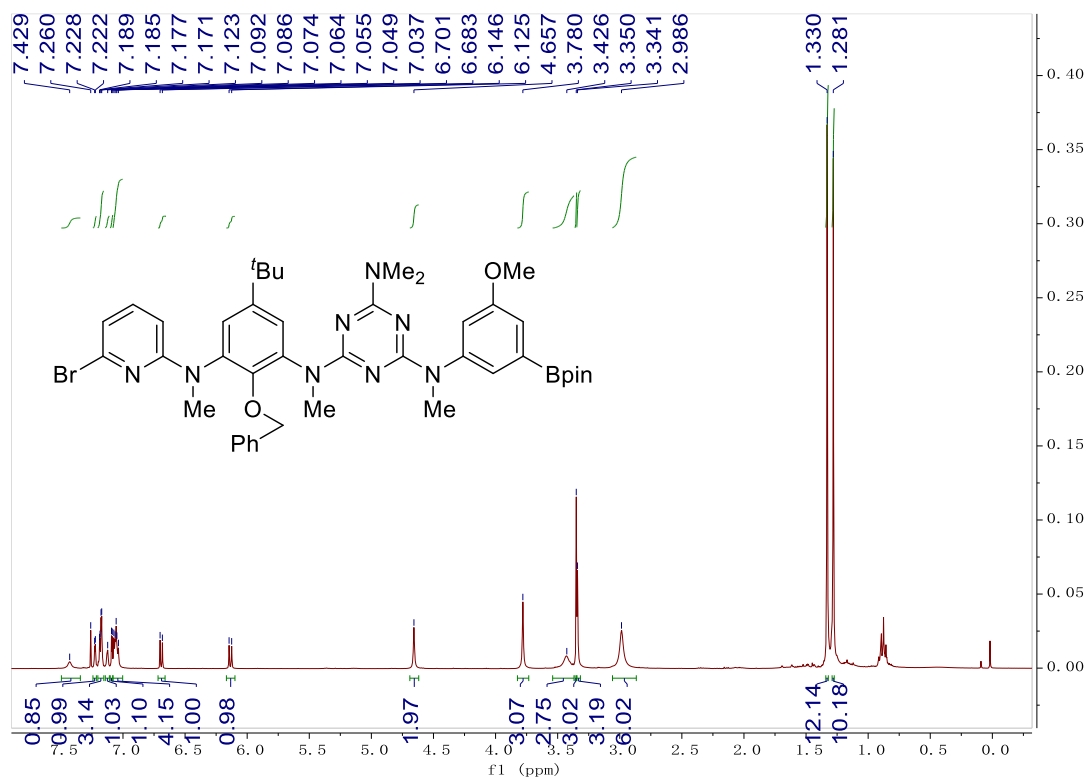

$^{13}\text{C}$  NMR spectrum of **6f** in  $\text{CDCl}_3$  at 333 K

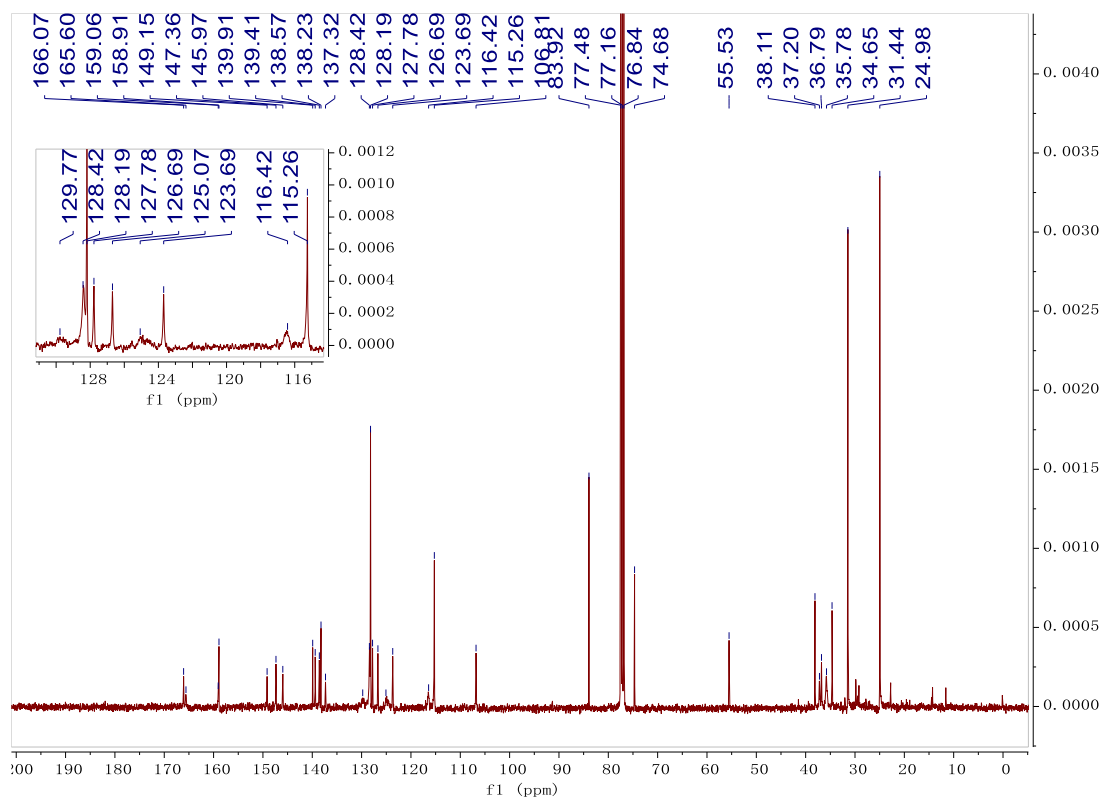



$^1\text{H}$  NMR spectrum of **6g** in  $\text{CDCl}_3$  at 333 K

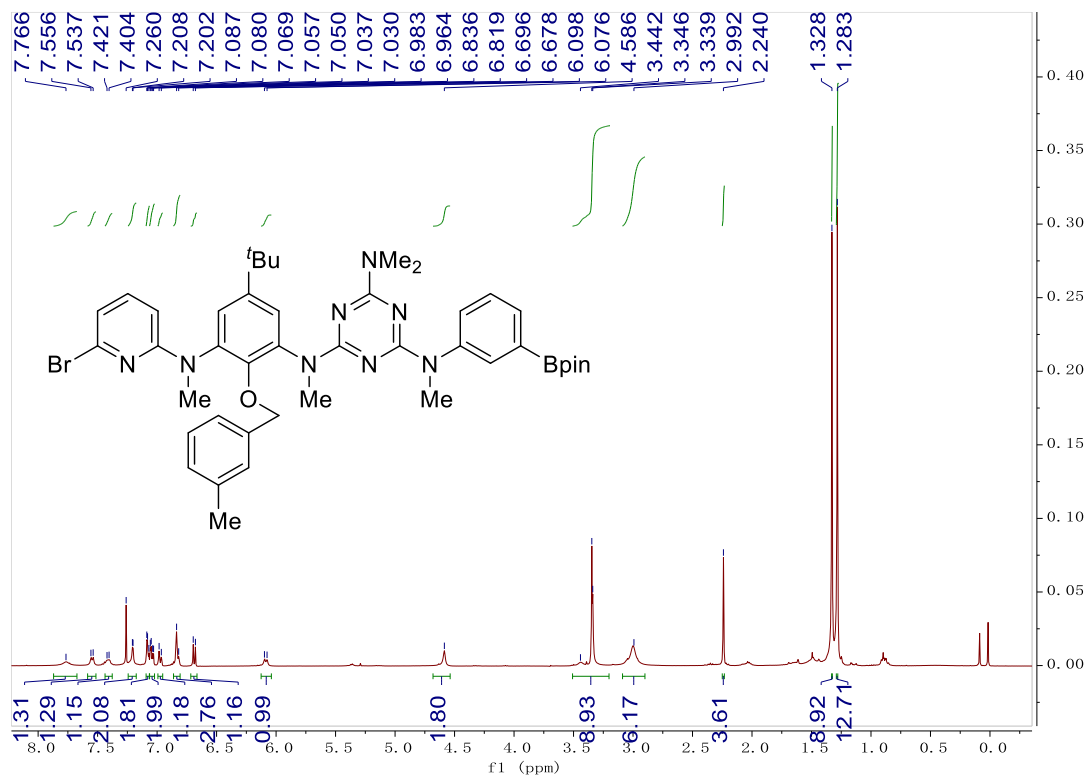

$^{13}\text{C}$  NMR spectrum of **6g** in  $\text{CDCl}_3$  at 333 K

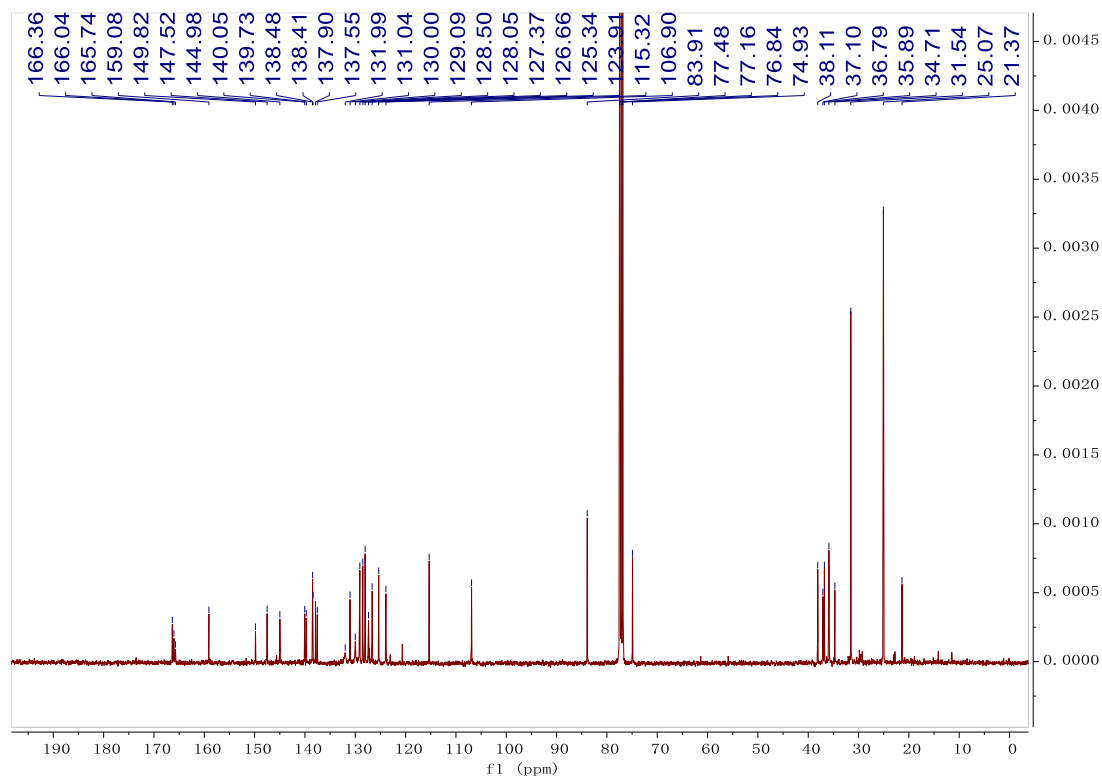

$^1\text{H}$  NMR spectrum of **6h** in  $\text{CDCl}_3$  at 333 K

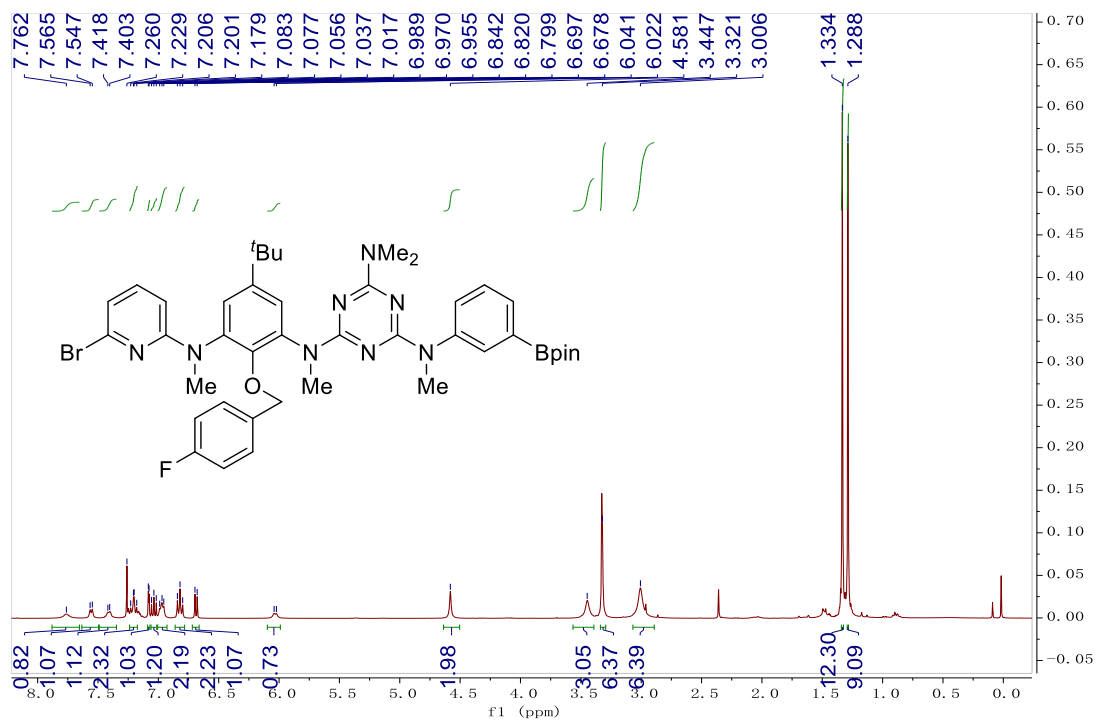

$^{13}\text{C}$  NMR spectrum of **6h** in  $\text{CDCl}_3$  at 333 K

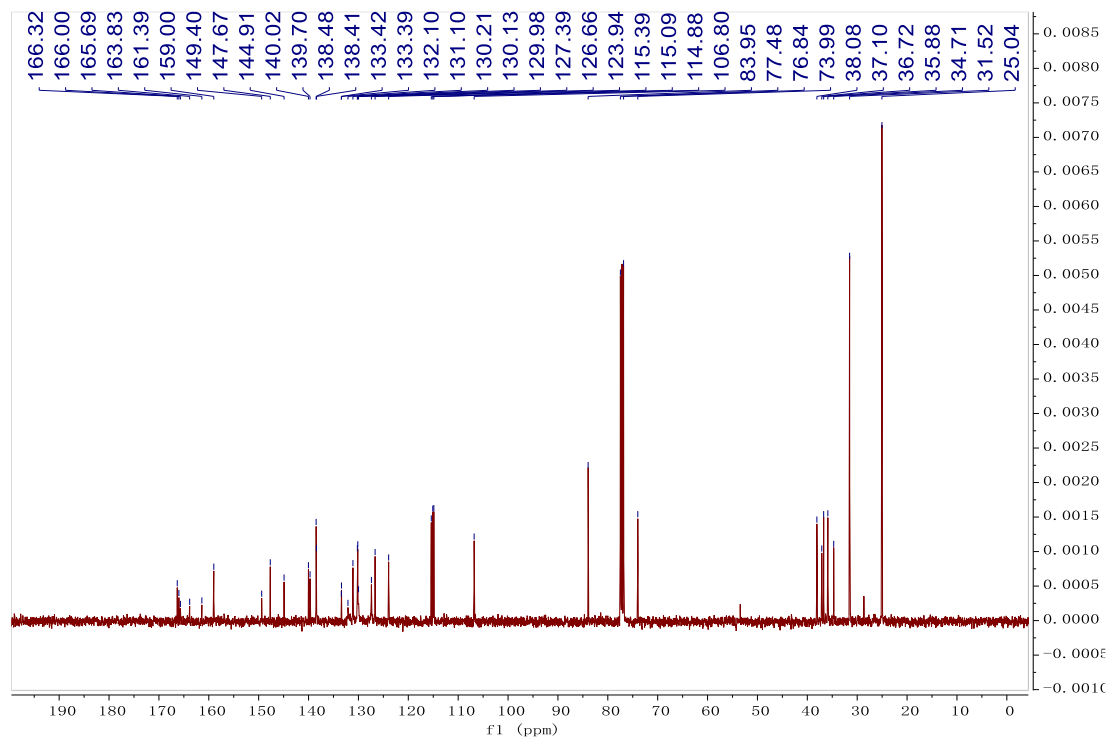

$^1\text{H}$  NMR spectrum of **6i** in  $\text{CDCl}_3$  at 333 K

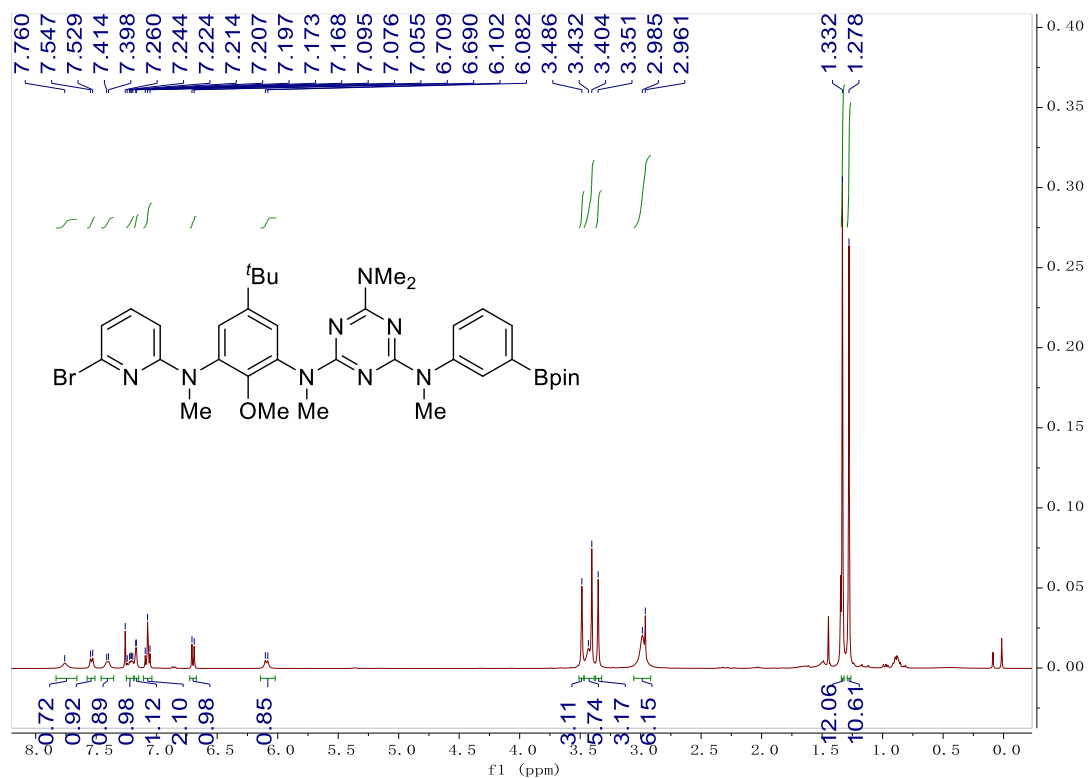

$^{13}\text{C}$  NMR spectrum of **6i** in  $\text{CDCl}_3$  at 333 K

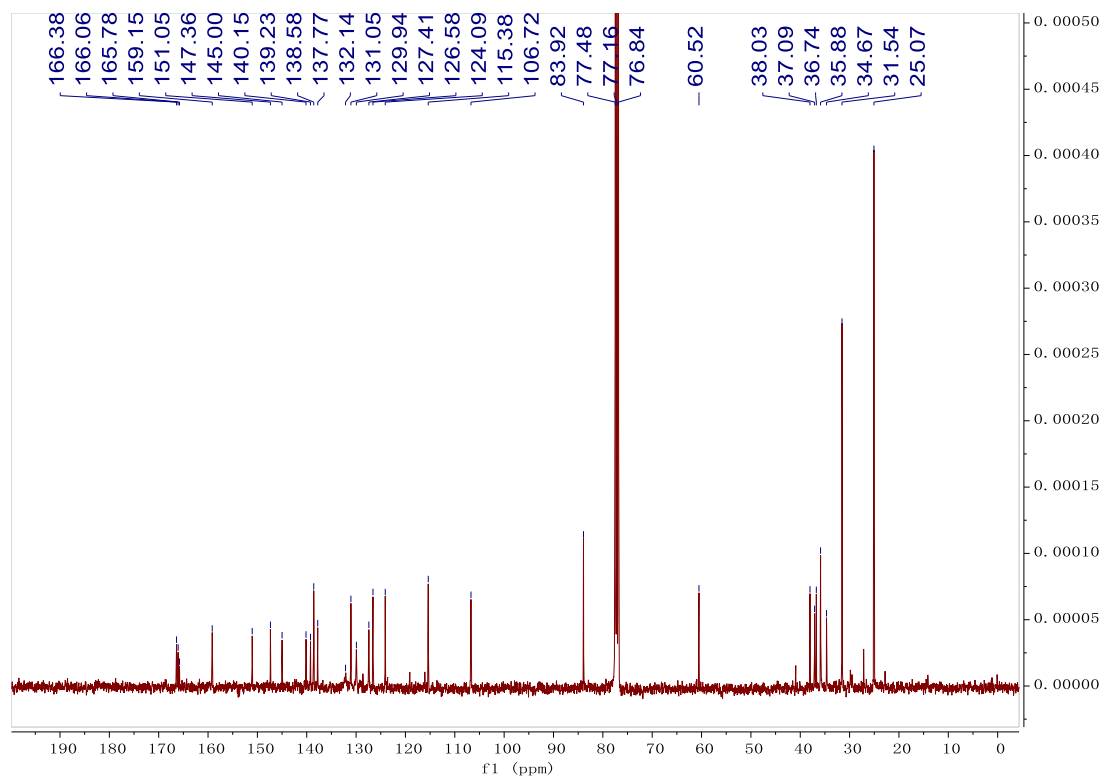

$^1\text{H}$  NMR spectrum of **6j** in  $\text{CDCl}_3$  at 333 K

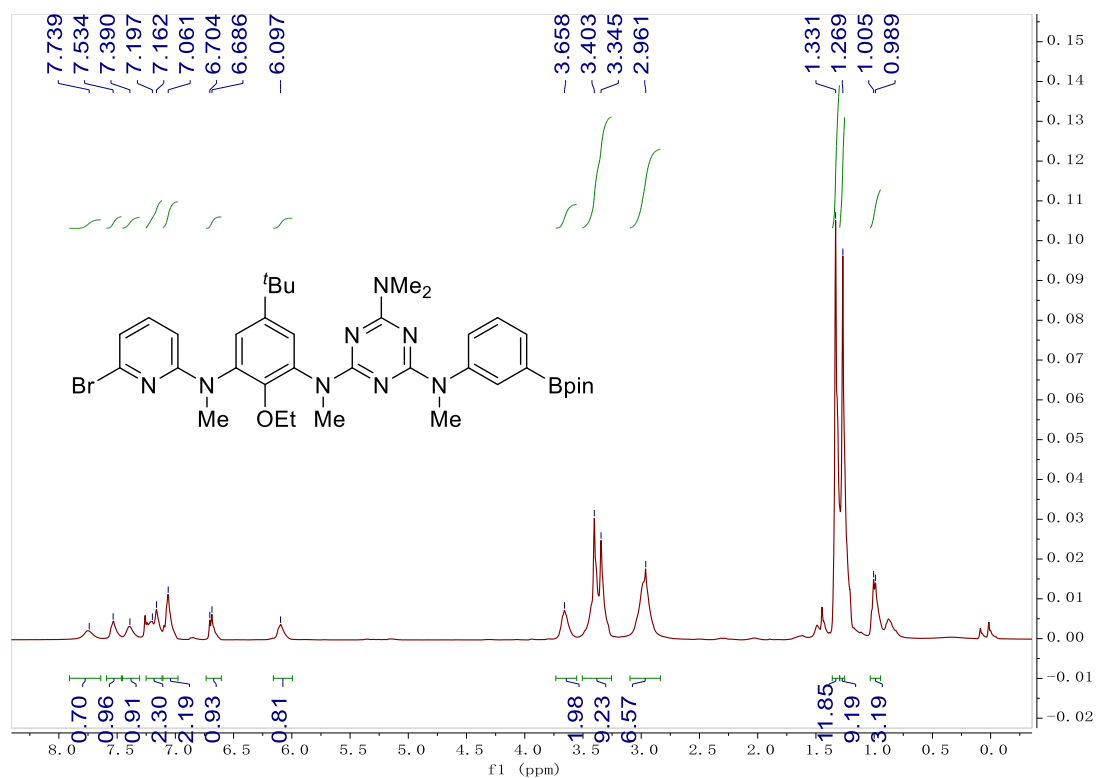

$^{13}\text{C}$  NMR spectrum of **6j** in  $\text{CDCl}_3$  at 333 K

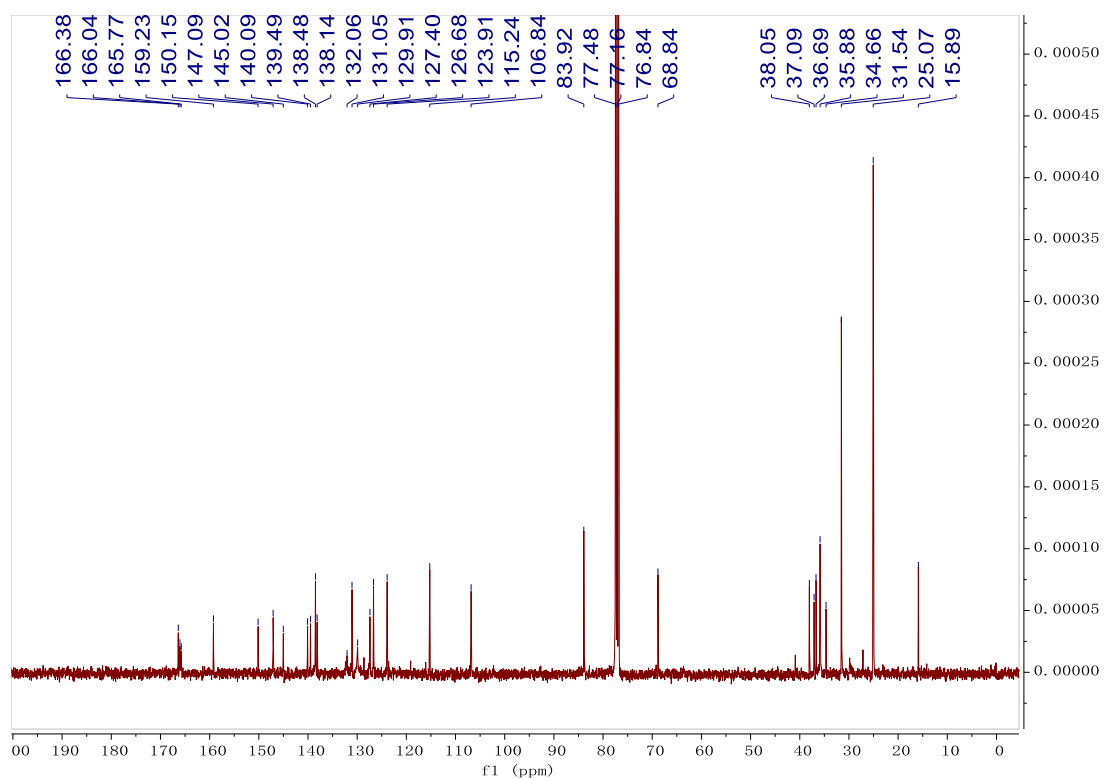

$^1\text{H}$  NMR spectrum of **6k** in  $\text{CDCl}_3$  at 333 K

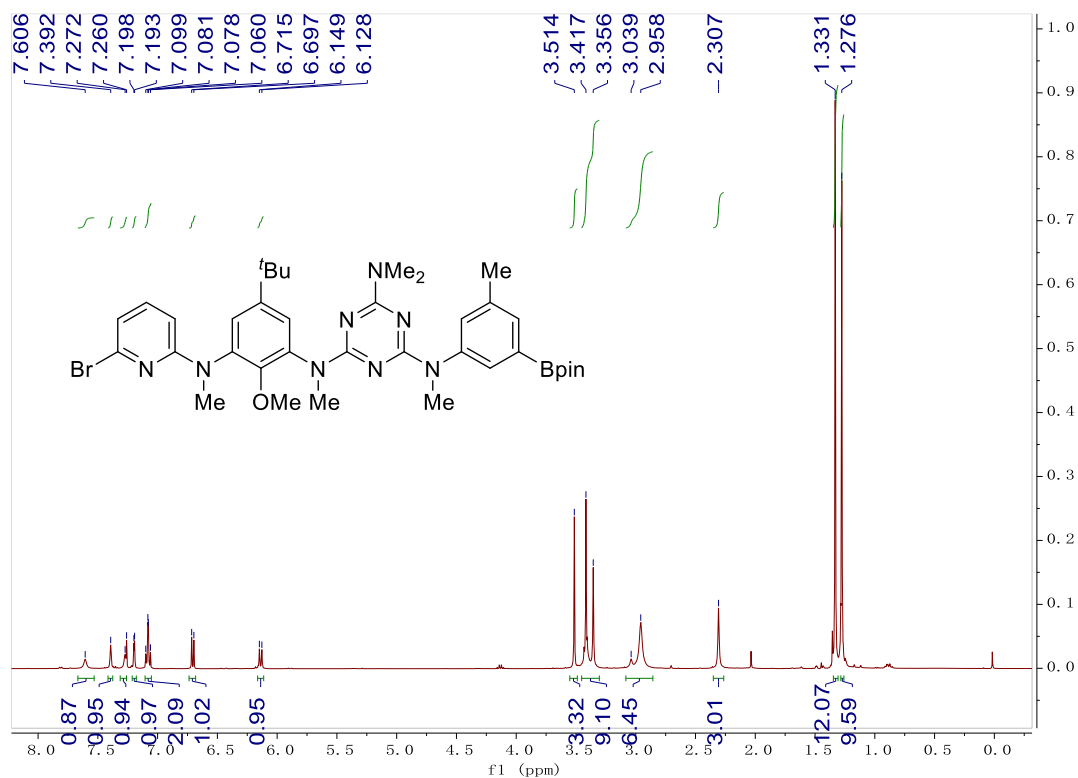

$^{13}\text{C}$  NMR spectrum of **6k** in  $\text{CDCl}_3$  at 333 K

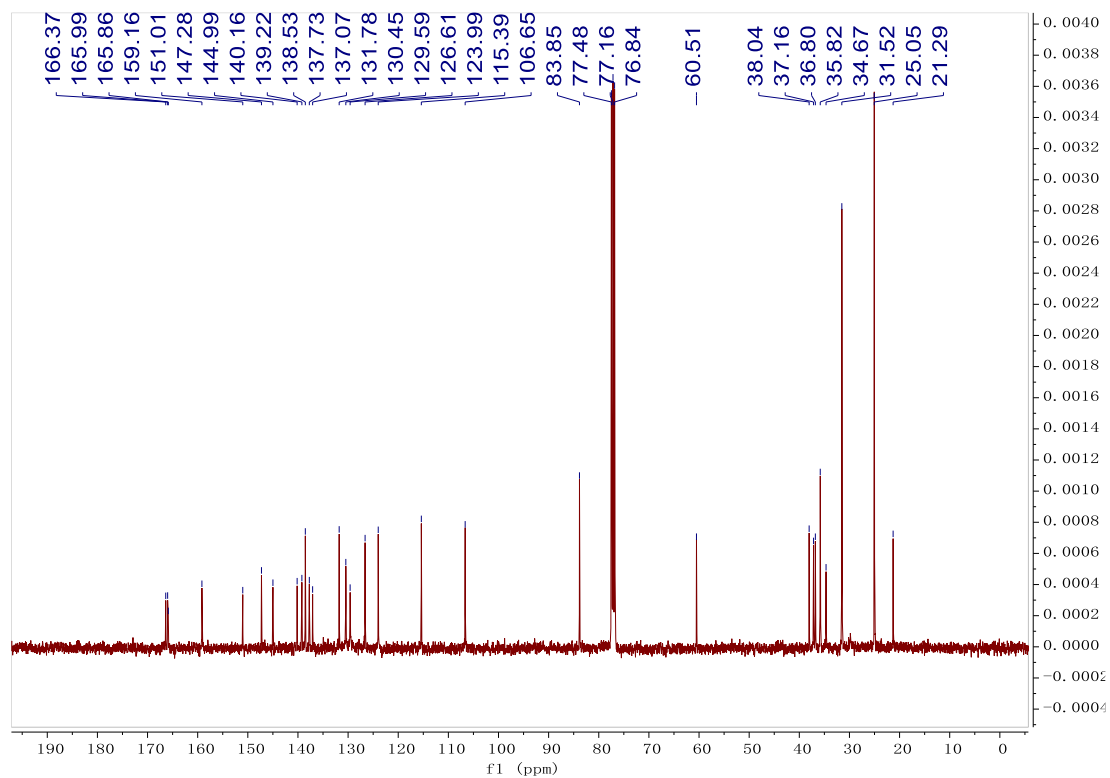

$^1\text{H}$  NMR spectrum of **6l** in  $\text{CDCl}_3$  at 333 K

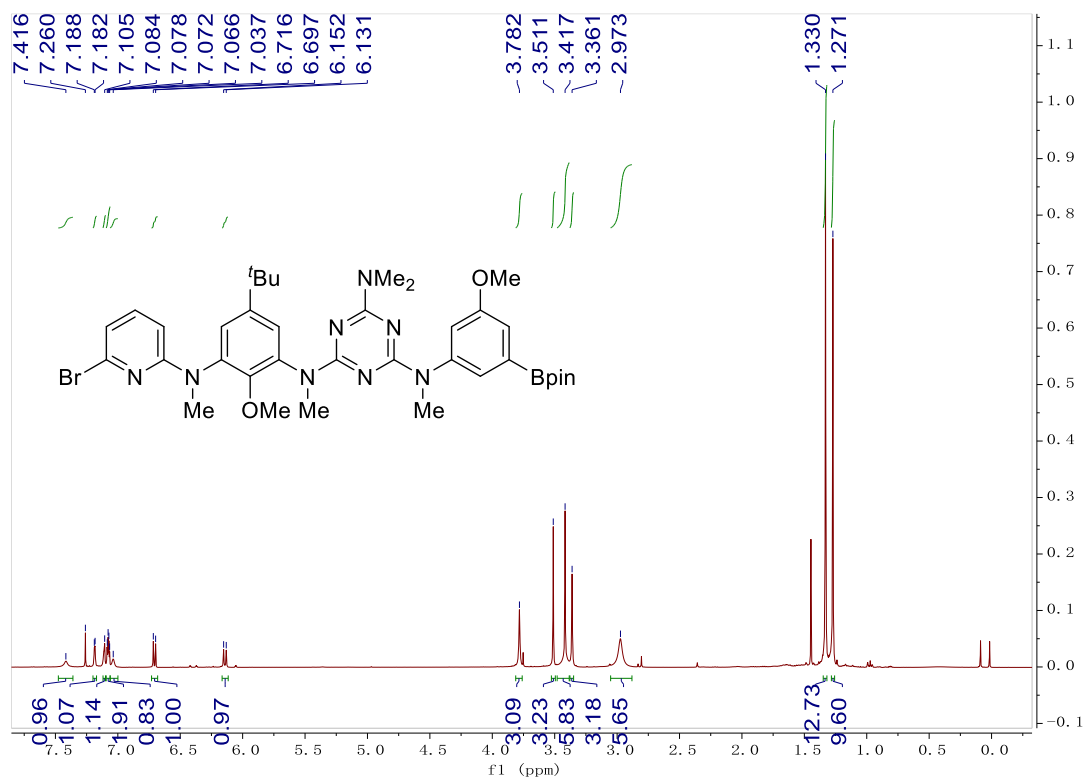

$^{13}\text{C}$  NMR spectrum of **6l** in  $\text{CDCl}_3$  at 333 K

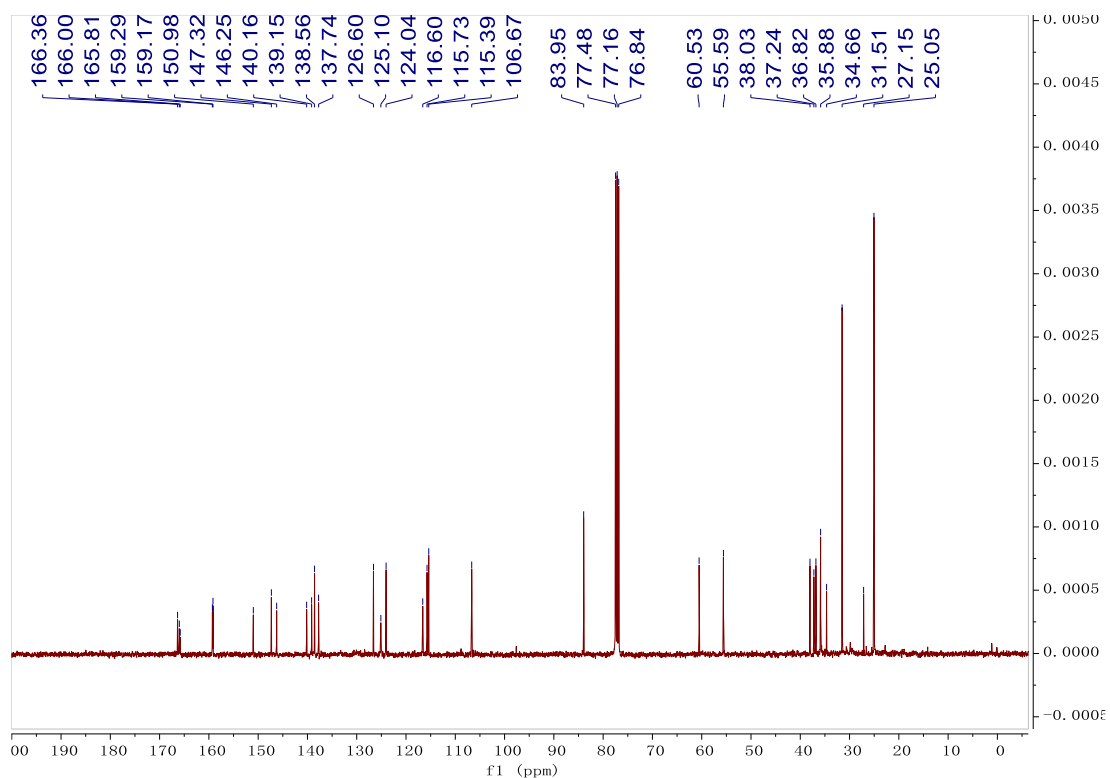

$^1\text{H}$  NMR spectrum of **6m** in  $\text{CDCl}_3$  at 333 K

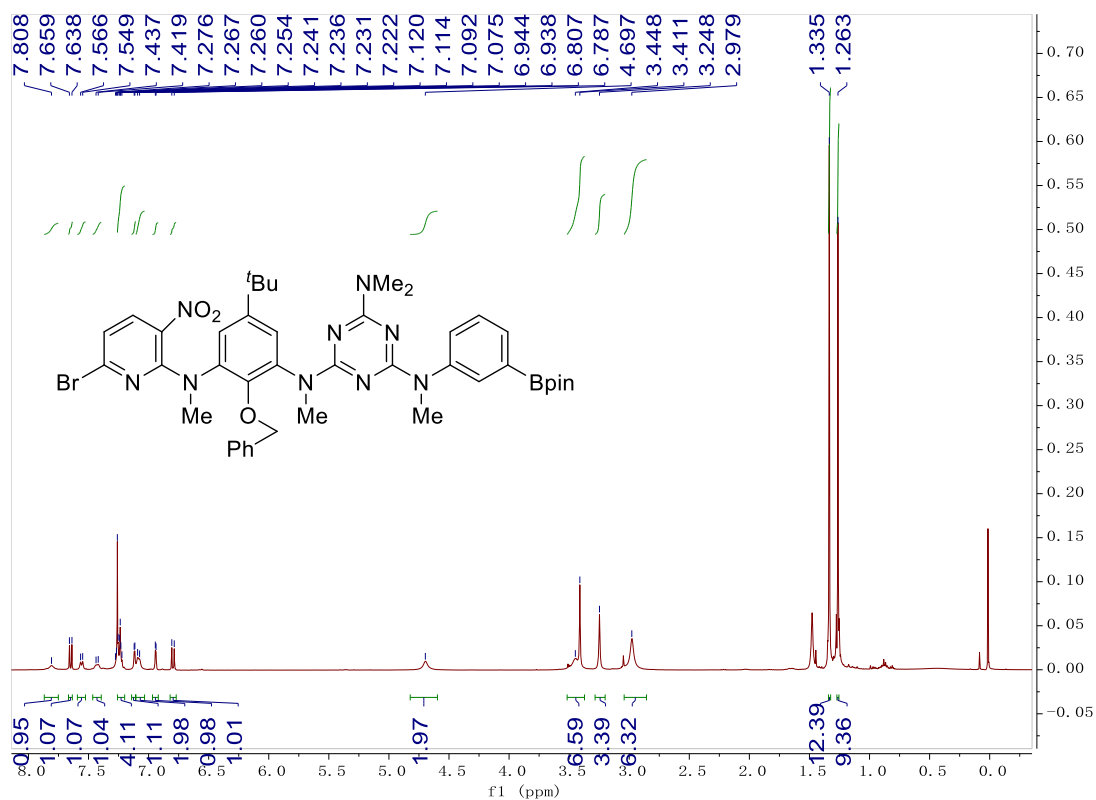

$^{13}\text{C}$  NMR spectrum of **6m** in  $\text{CDCl}_3$  at 333 K

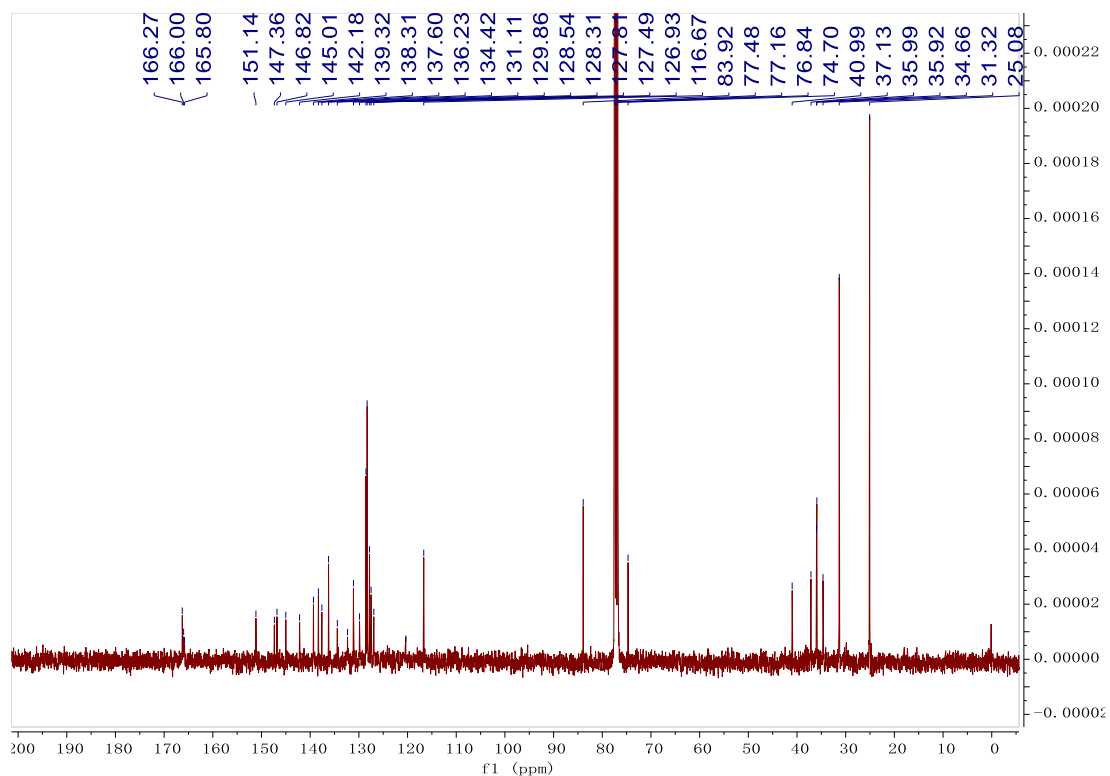

$^1\text{H}$  NMR spectrum of **6n** in  $\text{CDCl}_3$  at 333 K

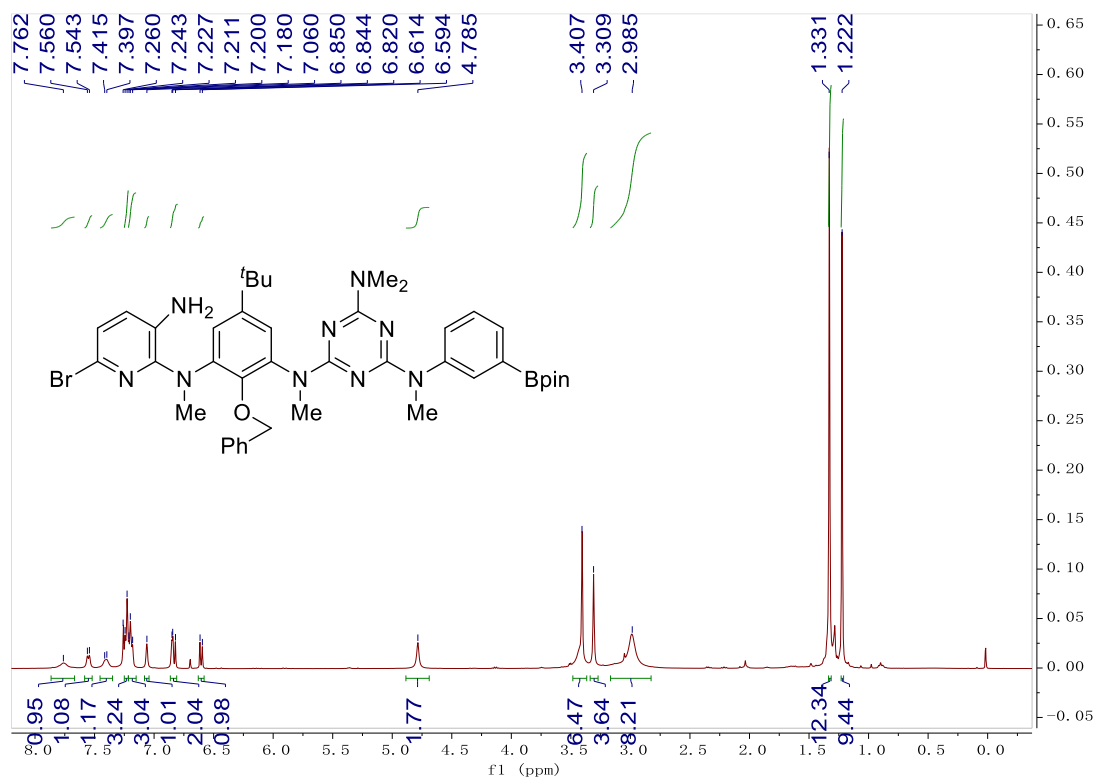

$^{13}\text{C}$  NMR spectrum of **6n** in  $\text{CDCl}_3$  at 333 K

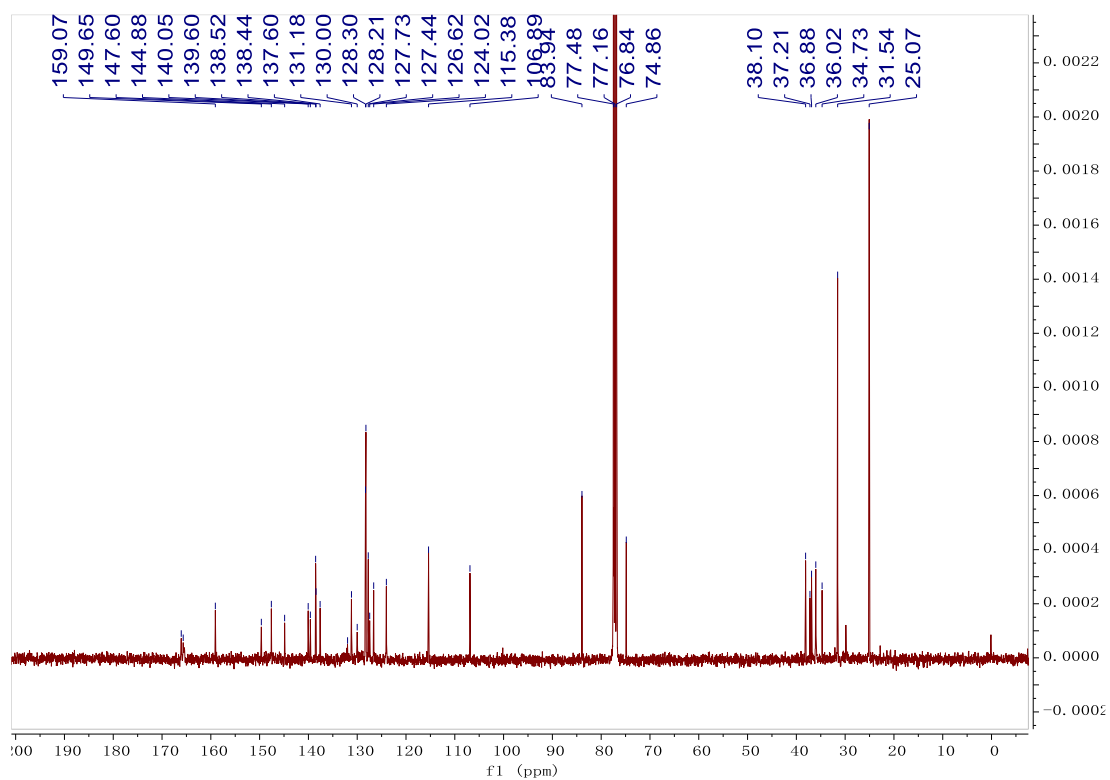



$^1\text{H}$  NMR spectrum of **60** in  $\text{CDCl}_3$  at 333 K

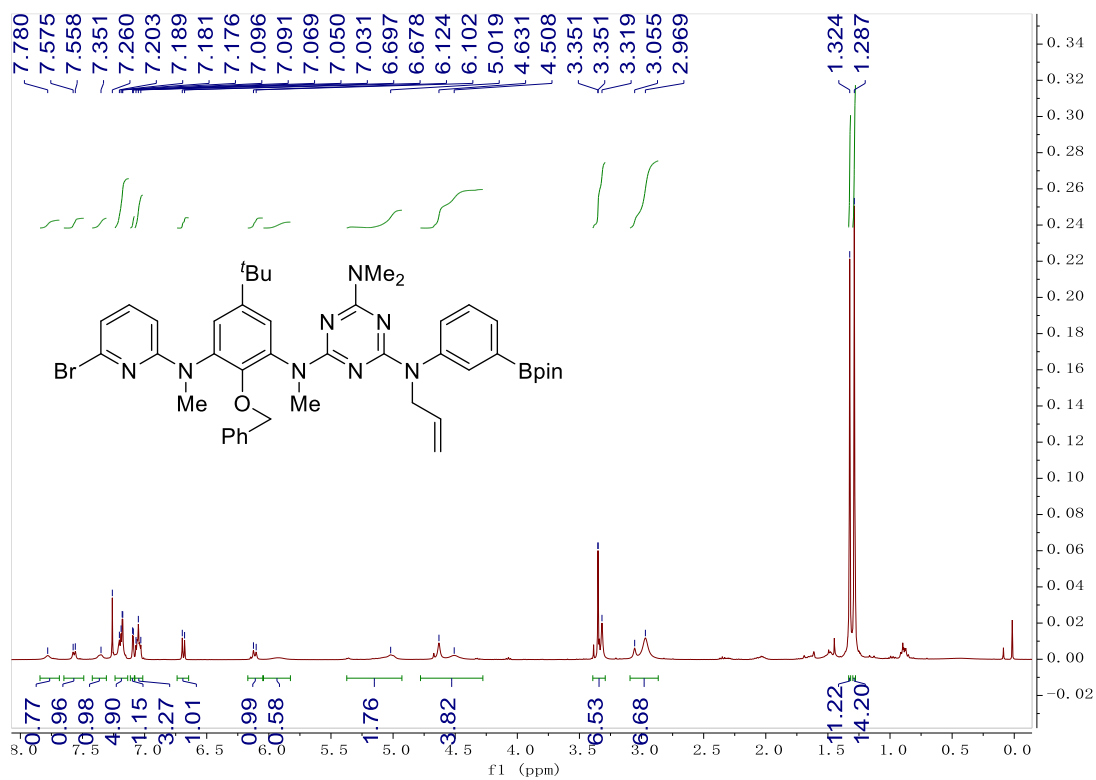

$^{13}\text{C}$  NMR spectrum of **60** in  $\text{CDCl}_3$  at 333 K

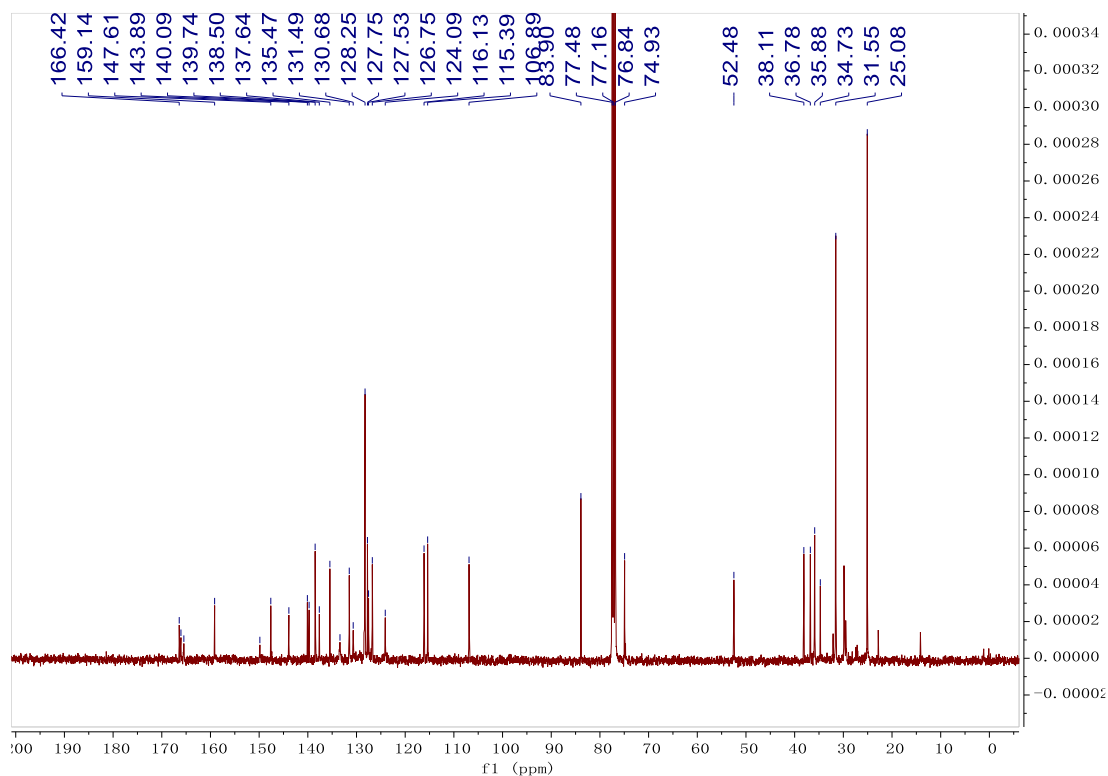

$^1\text{H}$  NMR spectrum of **6p** in  $\text{CDCl}_3$  at 333 K

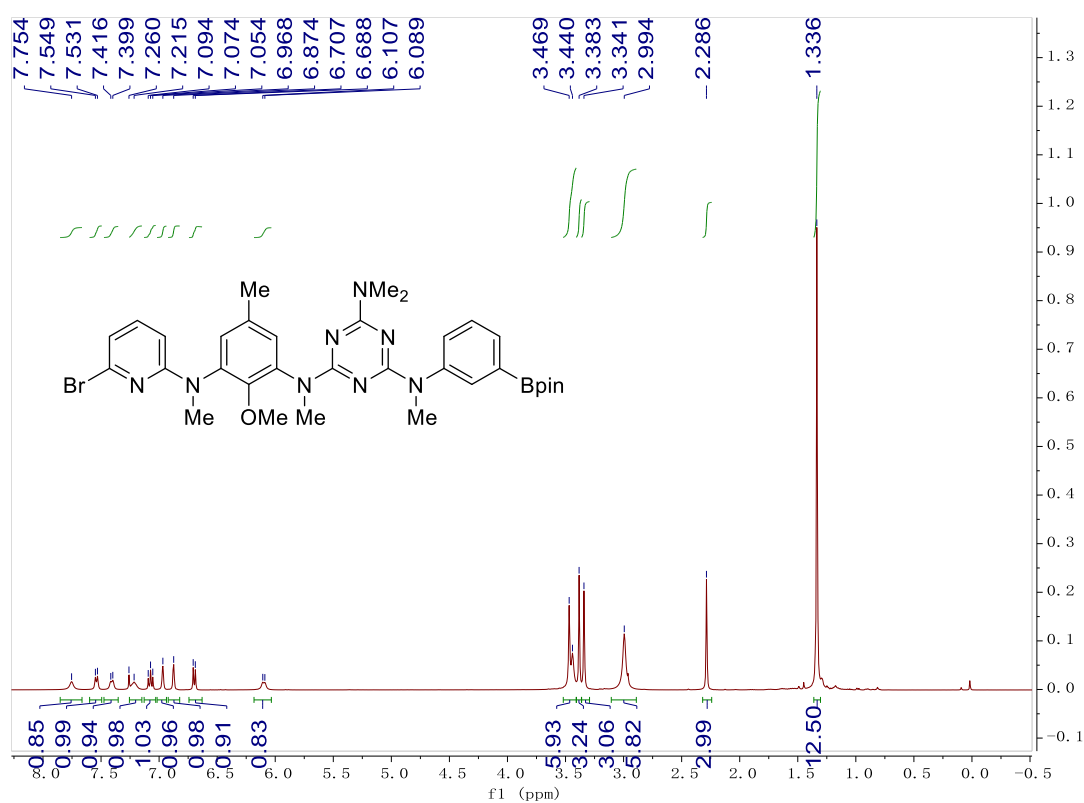

$^{13}\text{C}$  NMR spectrum of **6p** in  $\text{CDCl}_3$  at 333 K

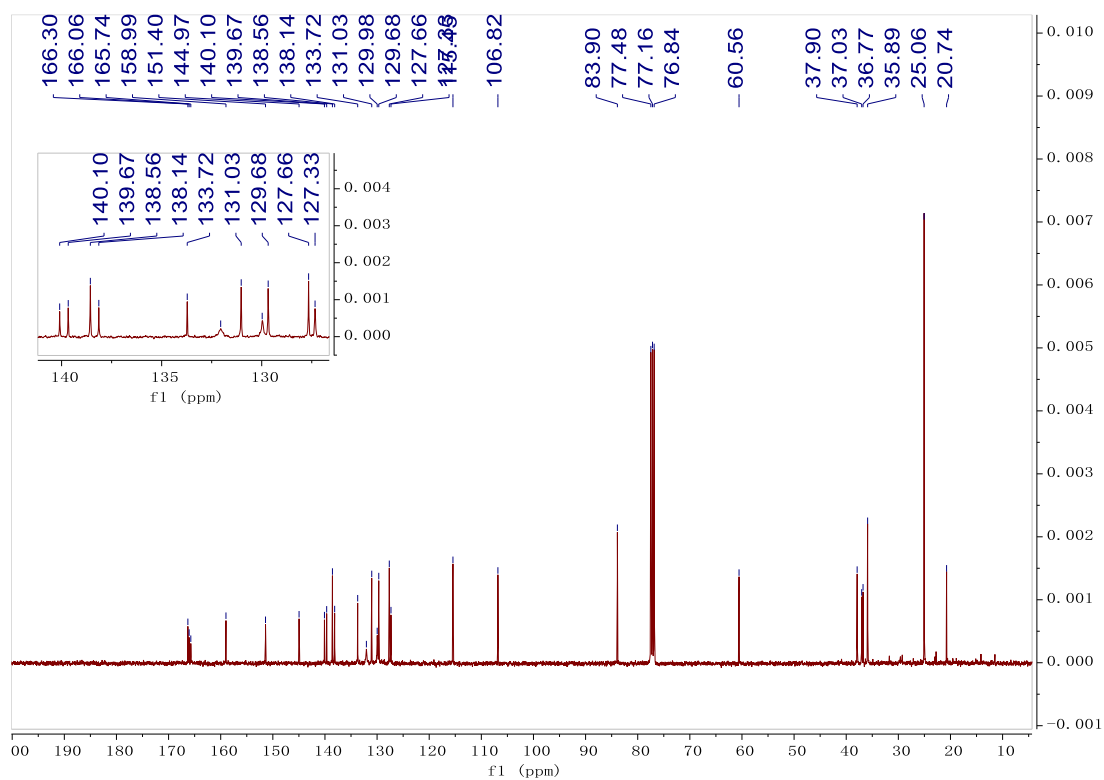

$^1\text{H}$  NMR spectrum of **6q** in  $\text{DMSO-}d_6$  at 373 K

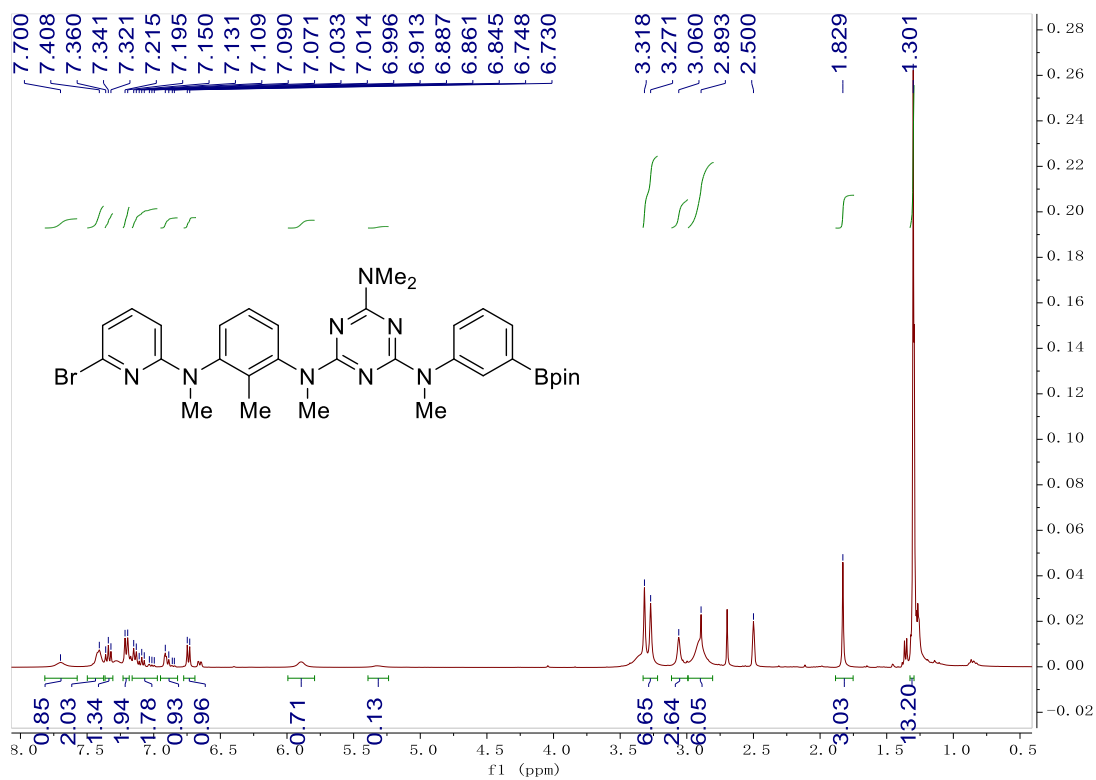

$^{13}\text{C}$  NMR spectrum of **6q** in  $\text{DMSO-}d_6$  at 373 K

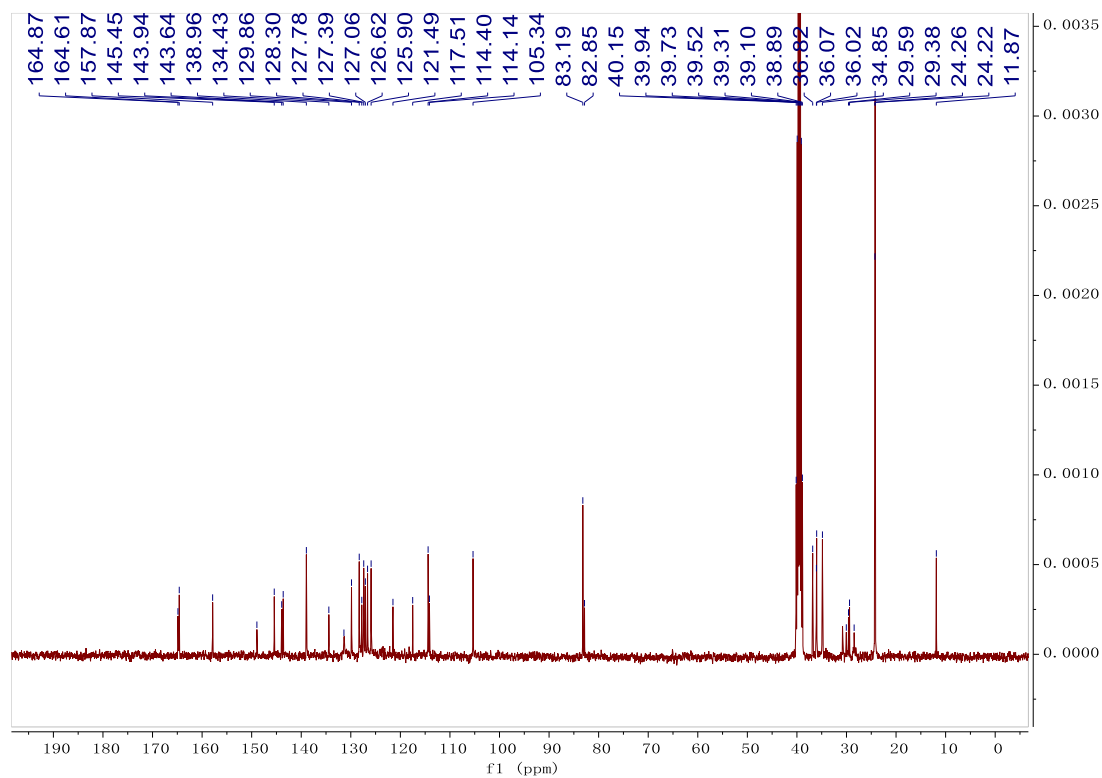

$^1\text{H}$  NMR spectrum of **6r** in  $\text{C}_2\text{D}_2\text{Cl}_4$  at 373 K

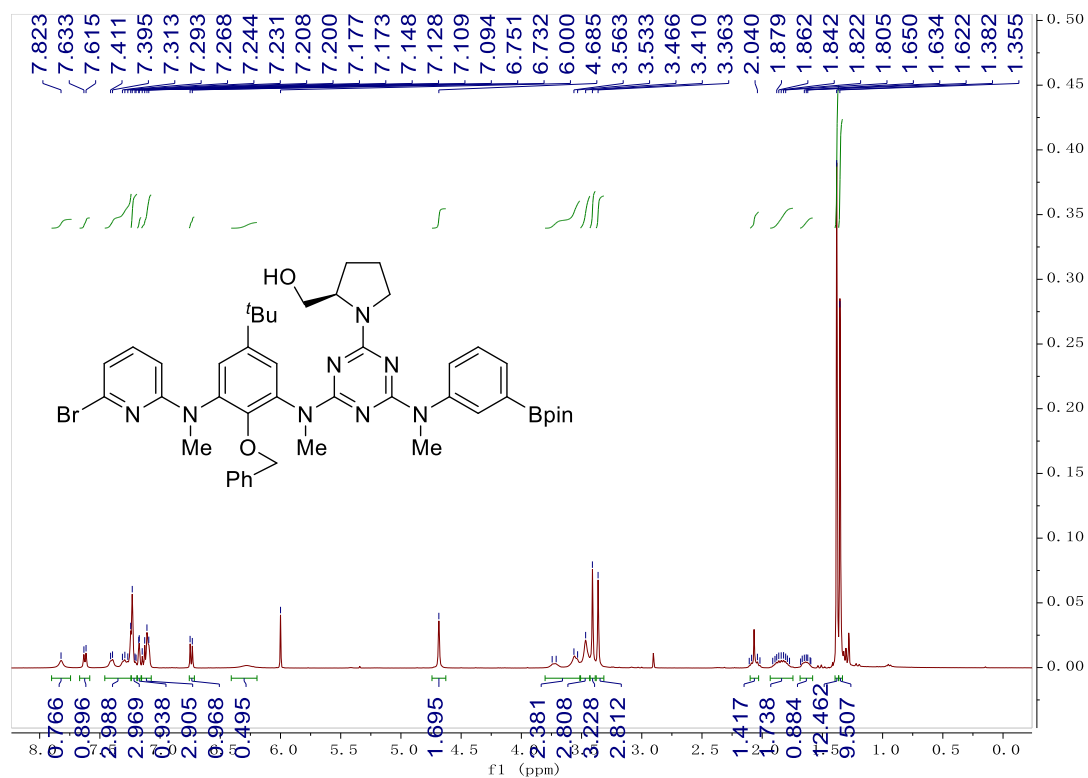

$^{13}\text{C}$  NMR spectrum of **6r** in  $\text{C}_2\text{D}_2\text{Cl}_4$  at 373 K

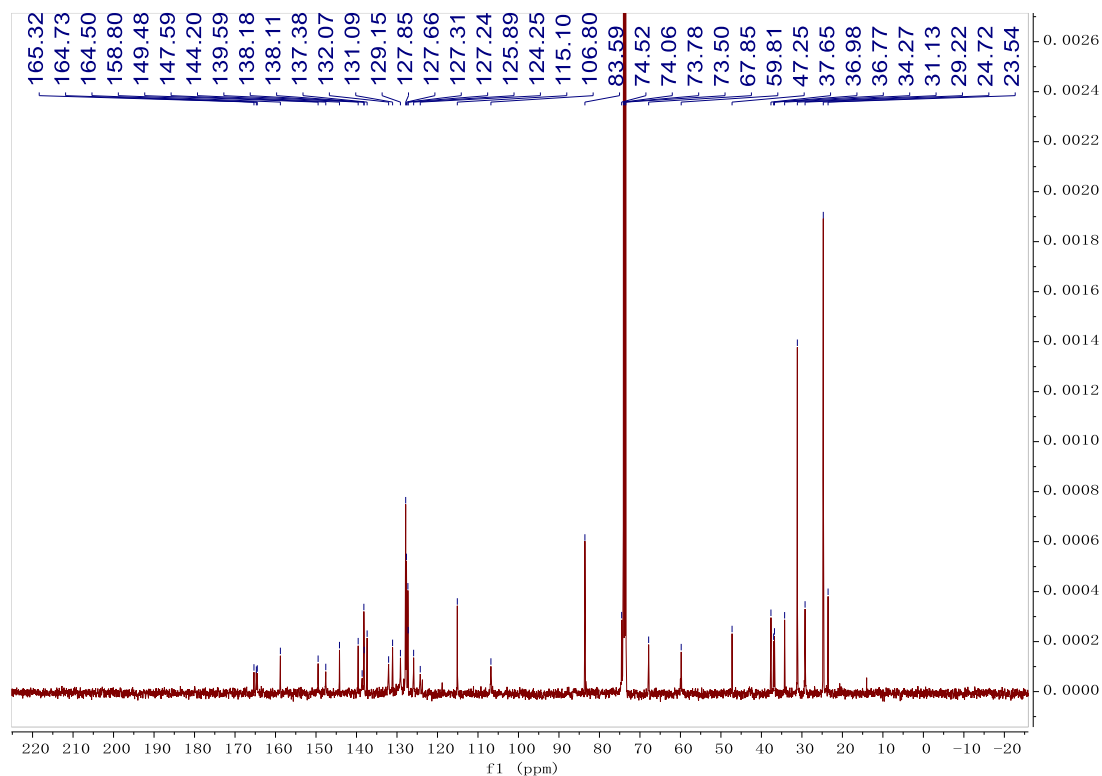

$^1\text{H}$  NMR spectrum of **6s** in  $\text{CDCl}_3$  at 333 K

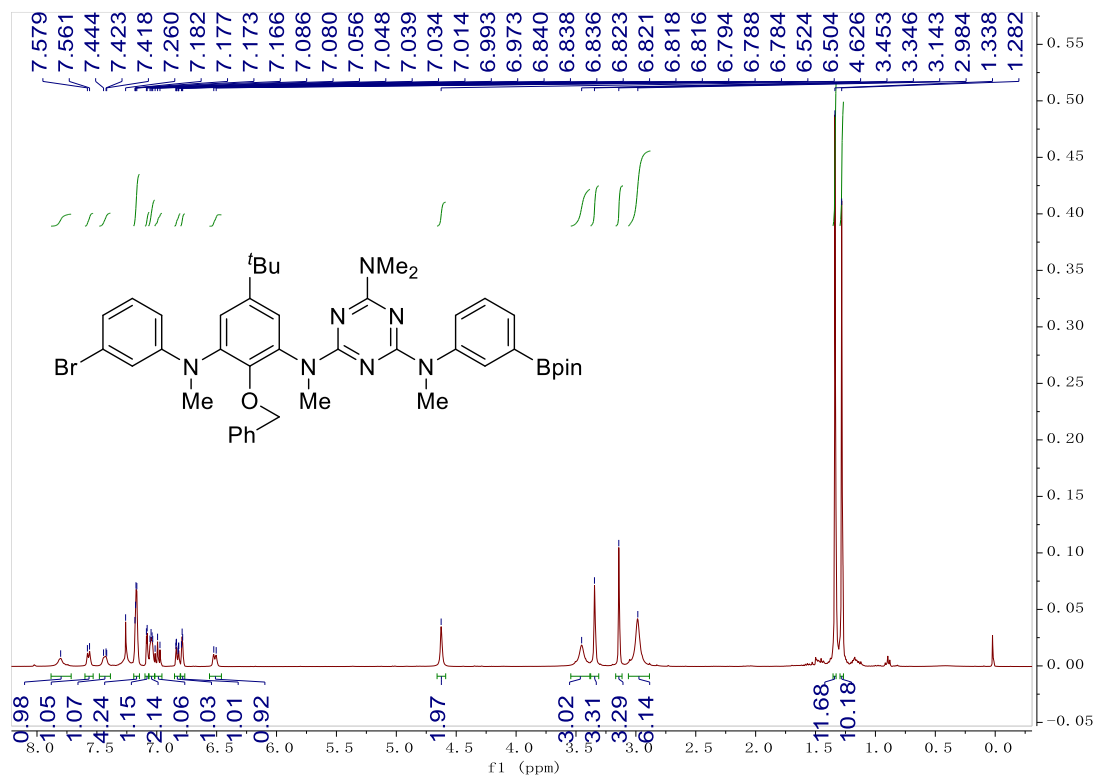

$^{13}\text{C}$  NMR spectrum of **6s** in  $\text{CDCl}_3$  at 333 K

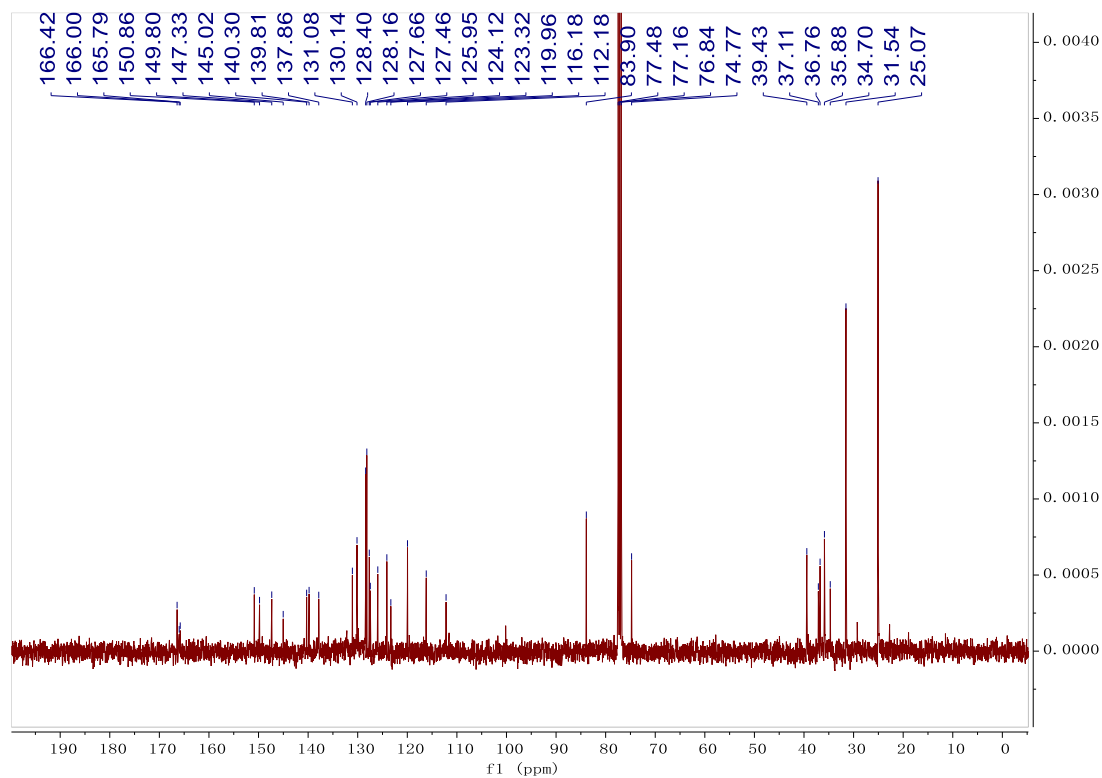

$^1\text{H}$  NMR spectrum of **6t** in  $\text{CDCl}_3$  at 333 K

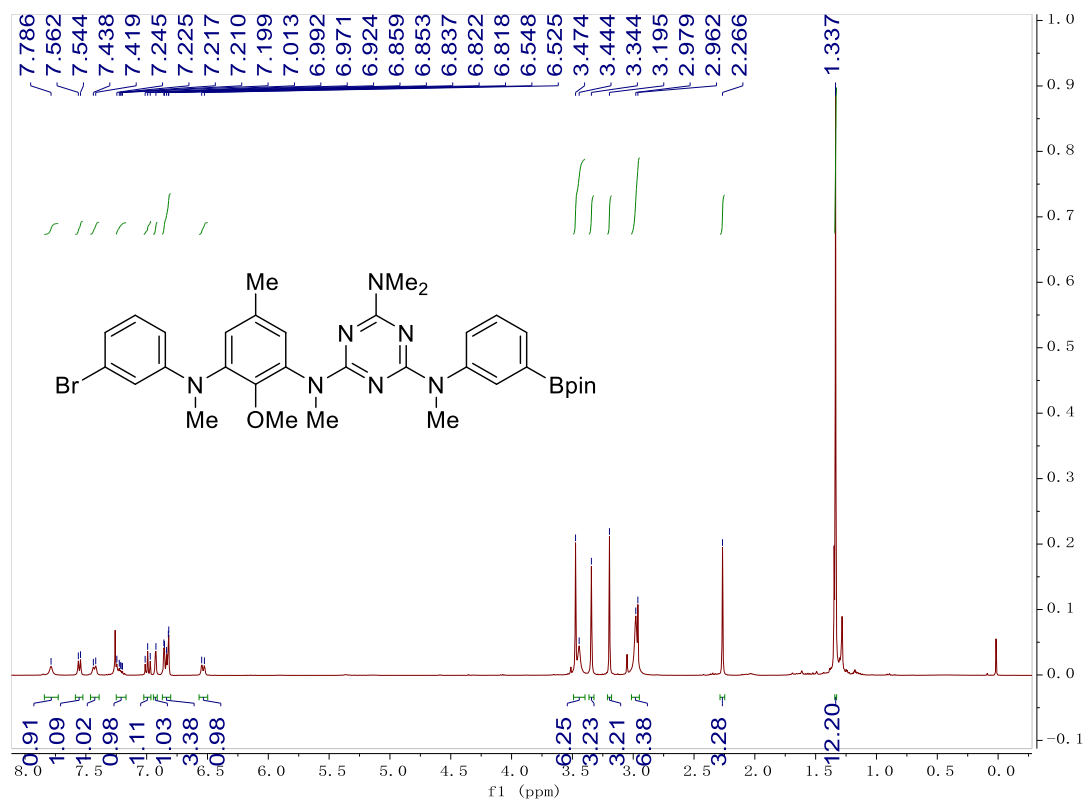

$^{13}\text{C}$  NMR spectrum of **6t** in  $\text{CDCl}_3$  at 333 K

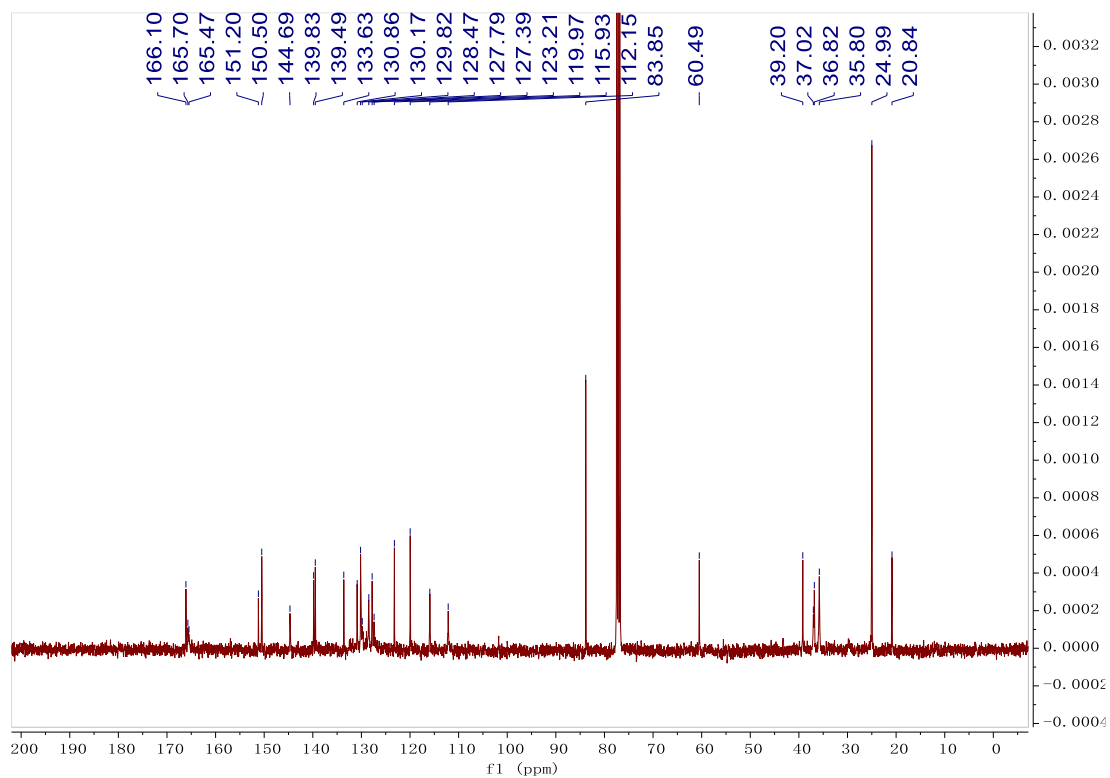

$^1\text{H}$  NMR spectrum of **6u** in  $\text{C}_2\text{D}_2\text{Cl}_4$  at 373 K

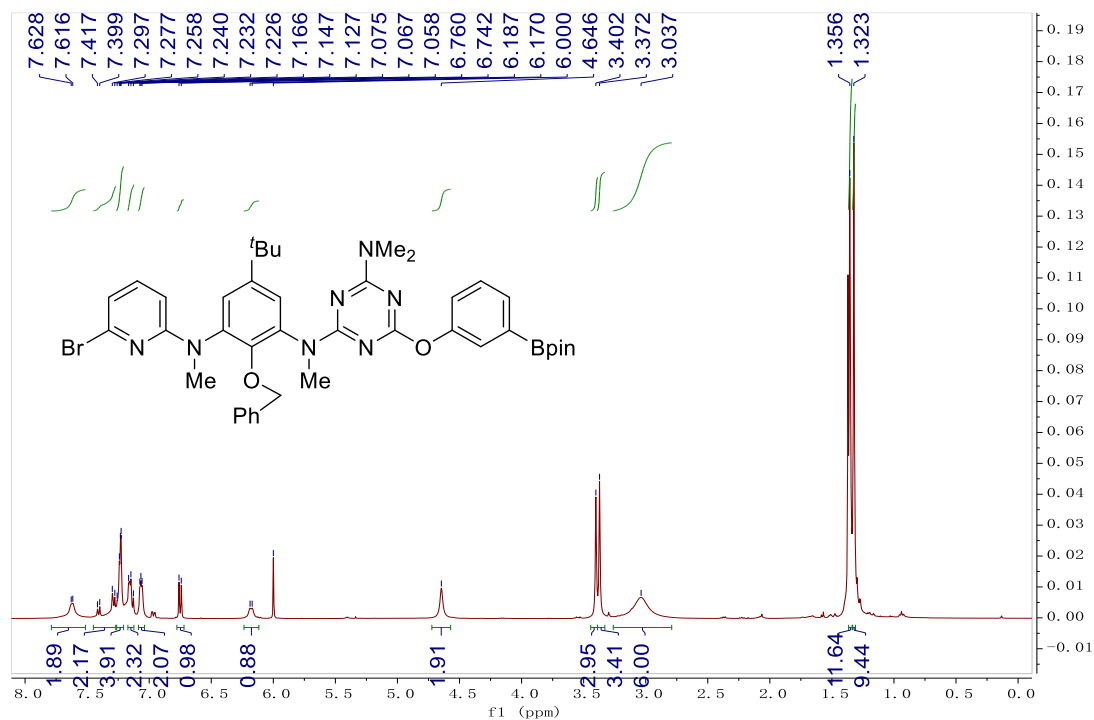

$^{13}\text{C}$  NMR spectrum of **6u** in  $\text{C}_2\text{D}_2\text{Cl}_4$  at 373 K

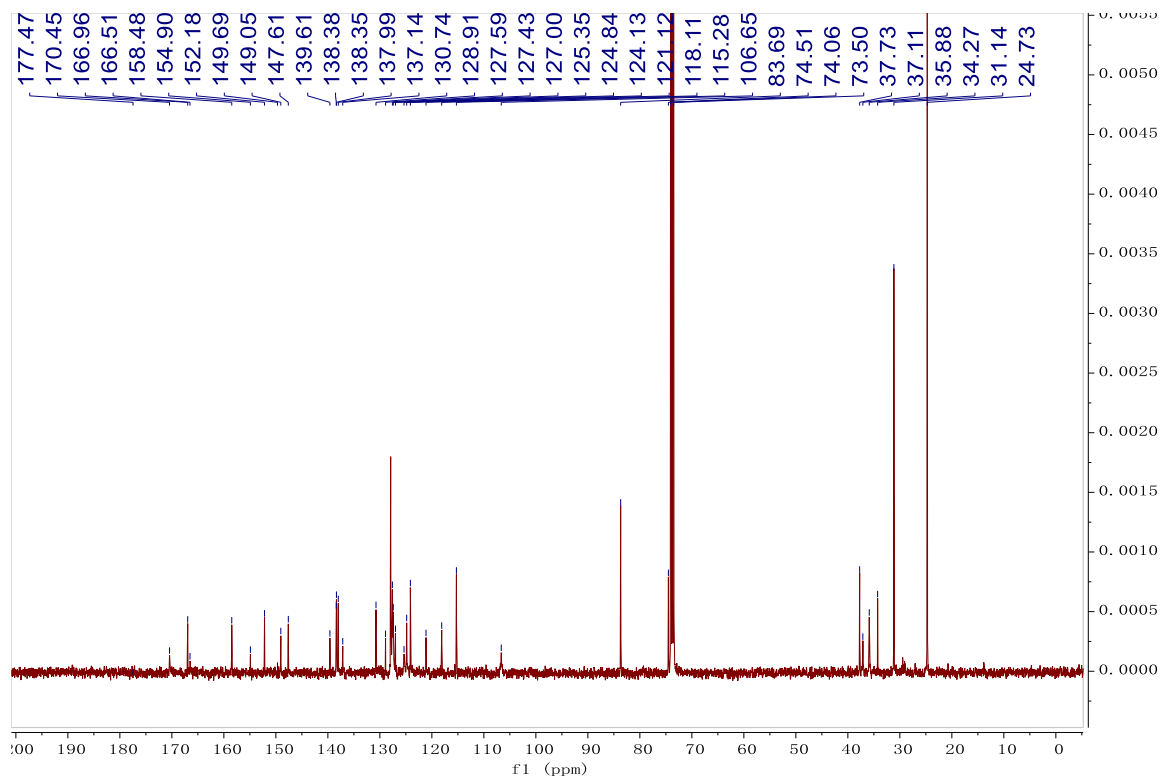

$^1\text{H}$  NMR spectrum of **6v** in  $\text{C}_2\text{D}_2\text{Cl}_4$  at 373 K

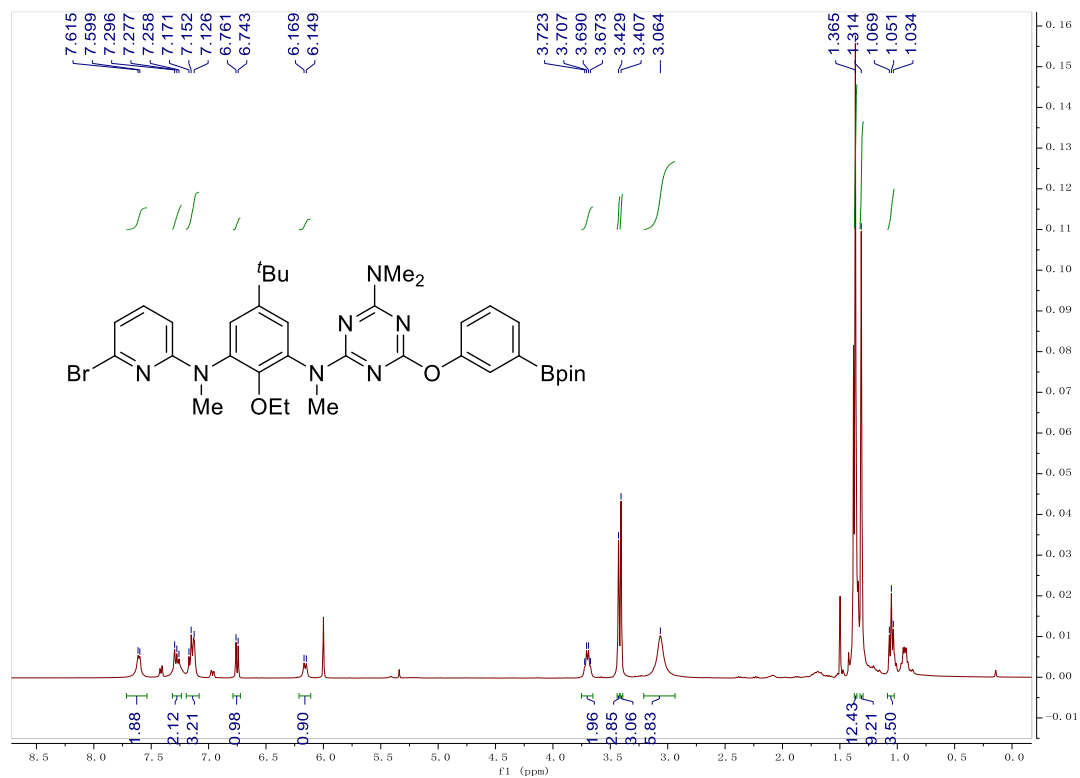

$^{13}\text{C}$  NMR spectrum of **6v** in  $\text{C}_2\text{D}_2\text{Cl}_4$  at 373 K

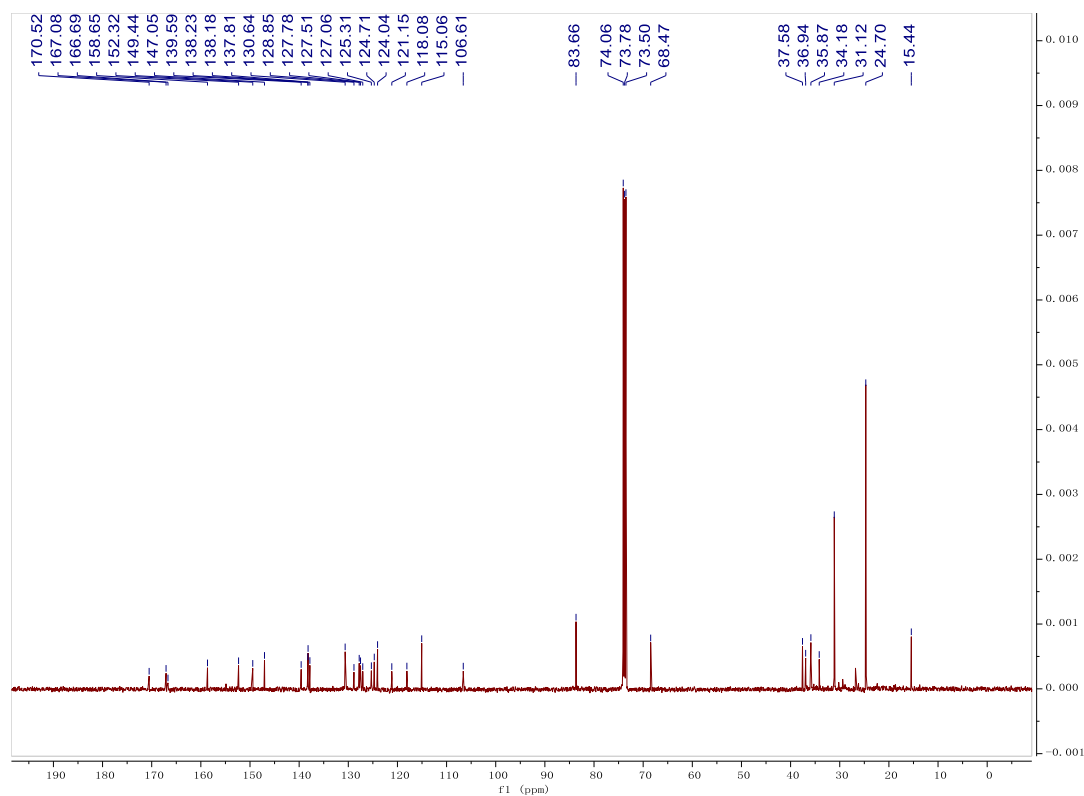



$^1\text{H}$  NMR spectrum of **6w** in  $\text{CDCl}_3$  at 333 K

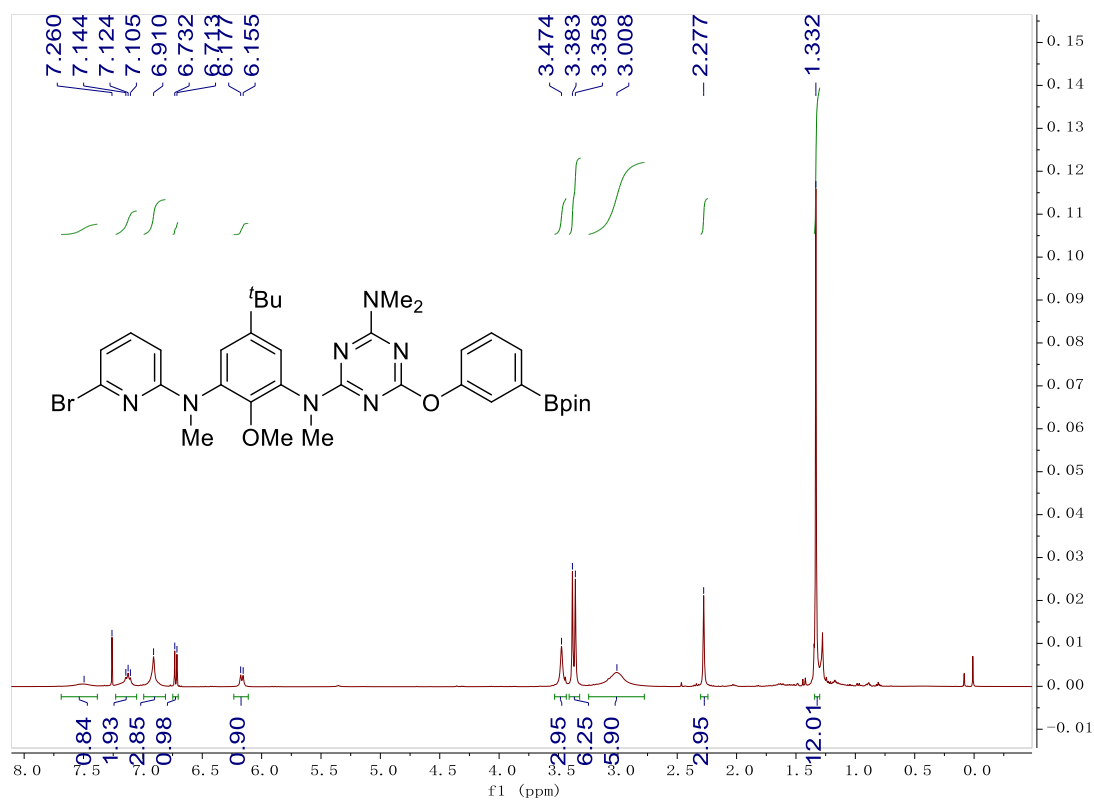

$^{13}\text{C}$  NMR spectrum of **6w** in  $\text{CDCl}_3$  at 333 K

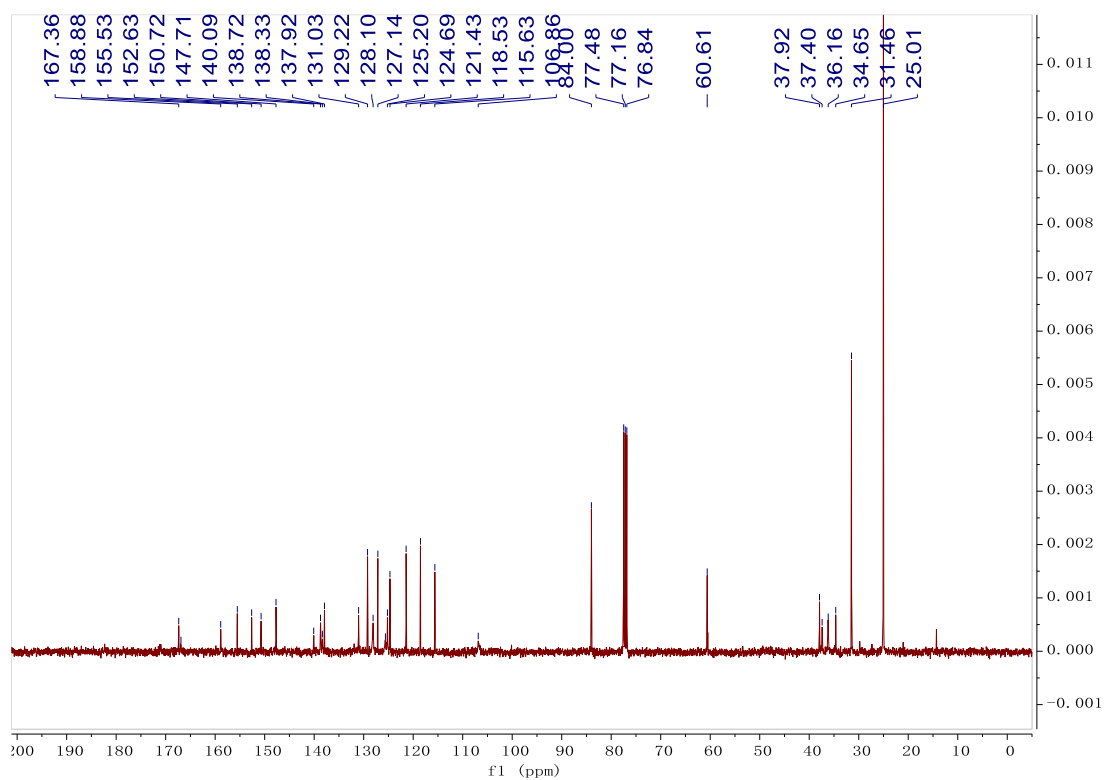

$^1\text{H}$  NMR spectrum of **6x** in  $\text{CDCl}_3$  at 333 K

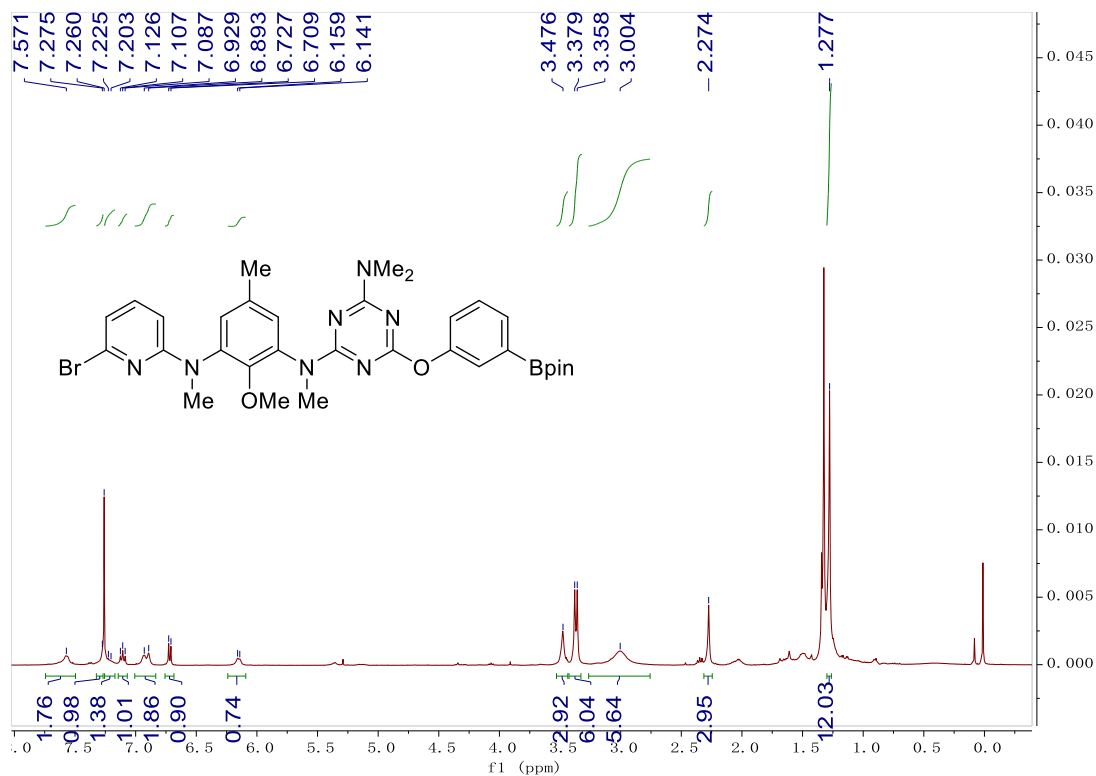

$^{13}\text{C}$  NMR spectrum of **6x** in  $\text{CDCl}_3$  at 333 K

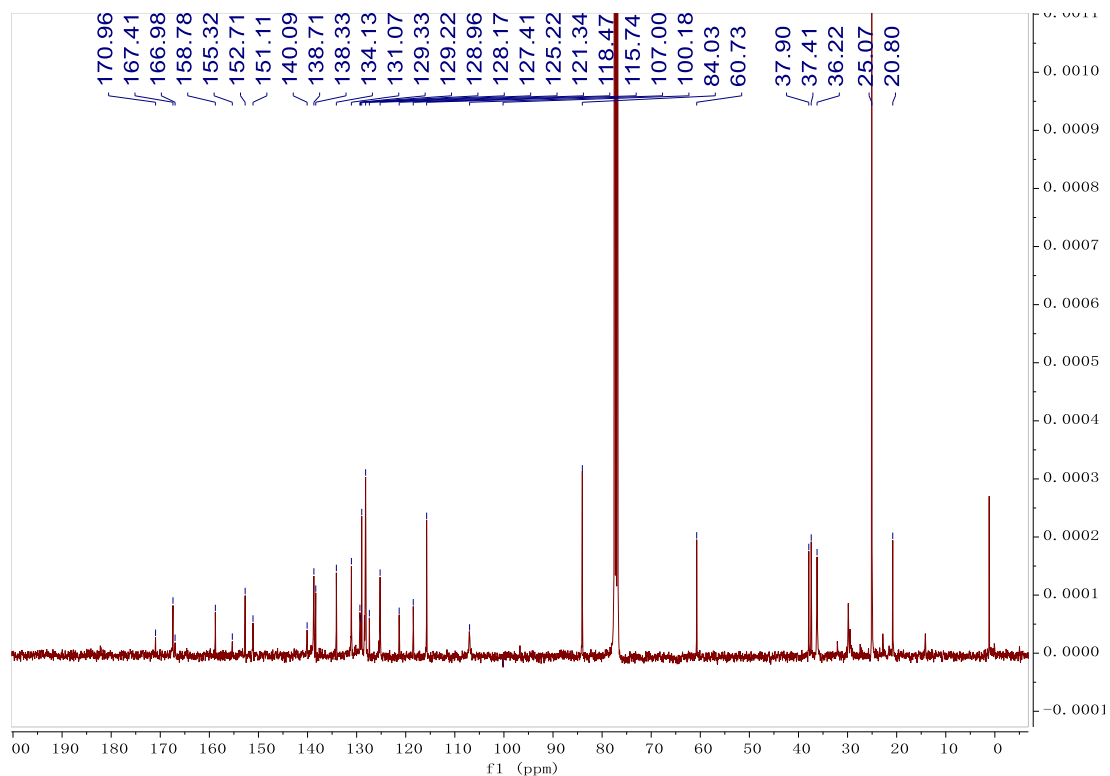

$^1\text{H}$  NMR spectrum of **6y** in  $\text{CDCl}_3$  at 333 K

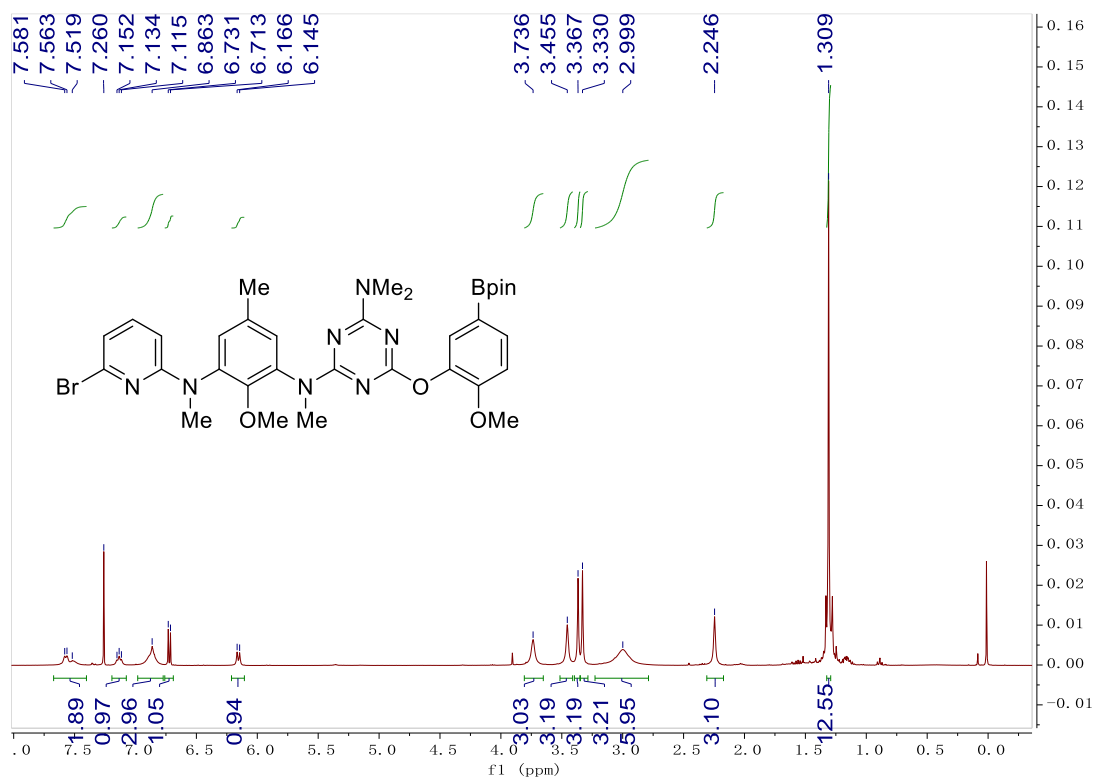

$^{13}\text{C}$  NMR spectrum of **6y** in  $\text{CDCl}_3$  at 333 K

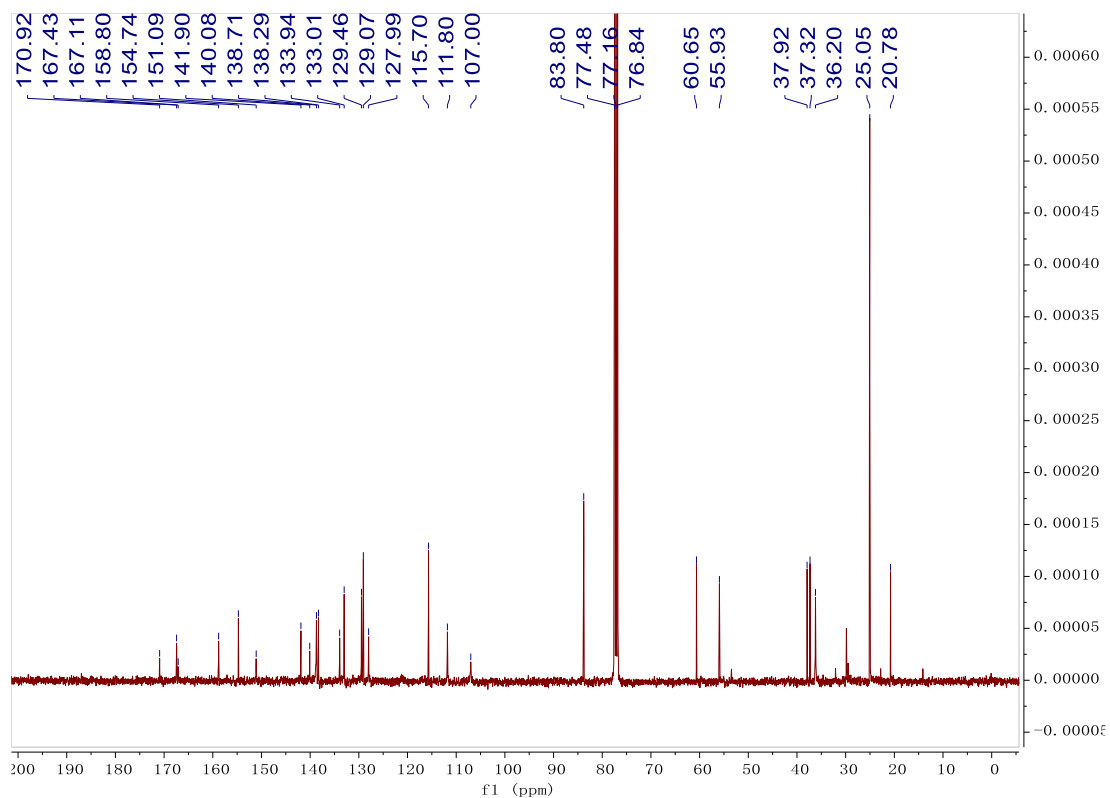

$^1\text{H}$  NMR spectrum of **6z** in  $\text{CDCl}_3$  at 333 K

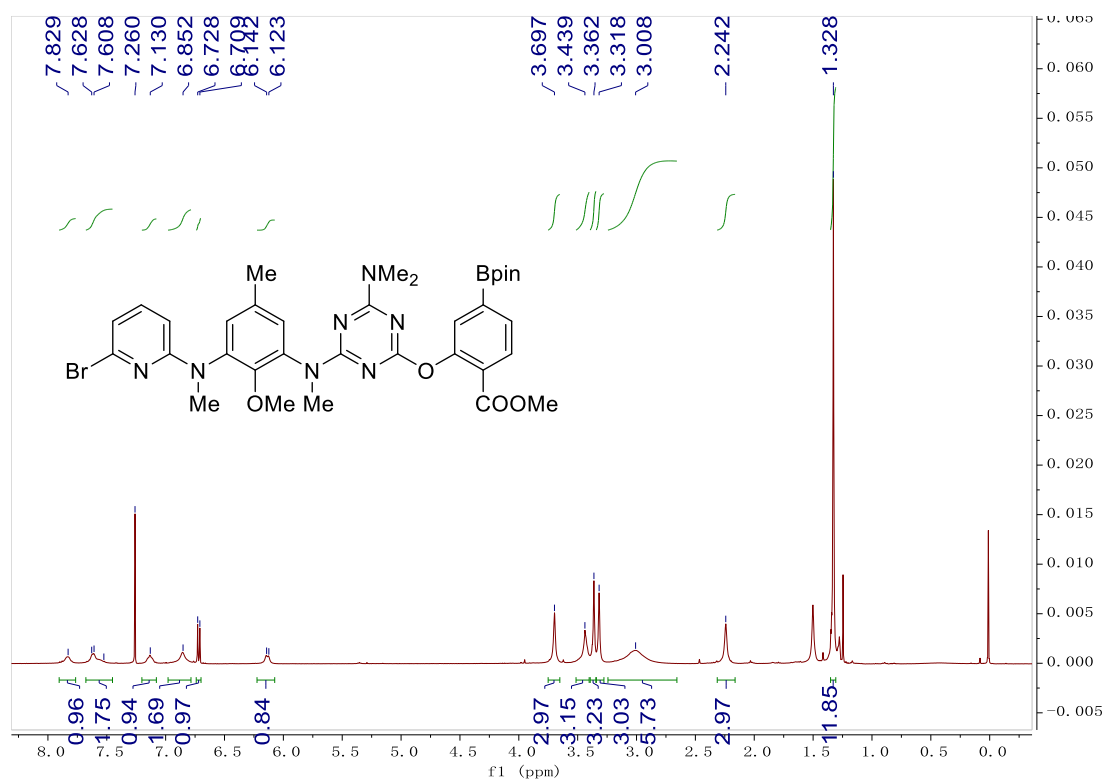

$^{13}\text{C}$  NMR spectrum of **6z** in  $\text{CDCl}_3$  at 333 K

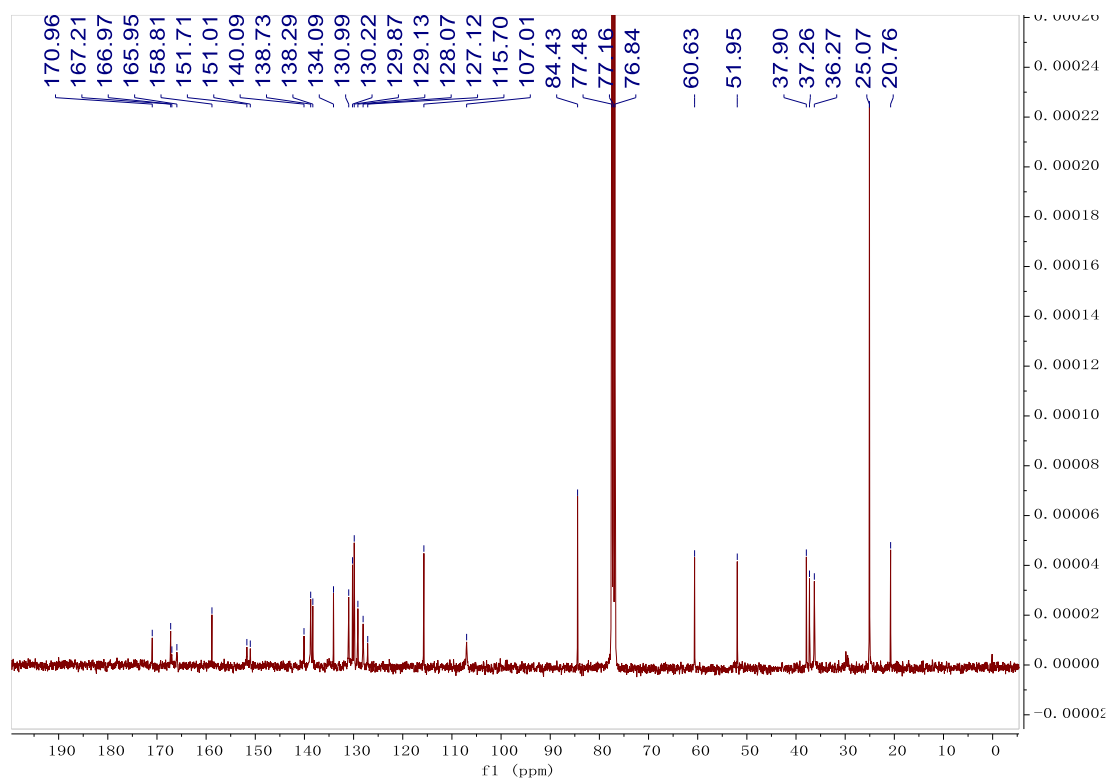

$^1\text{H}$  NMR spectrum of **6aa** in  $\text{CDCl}_3$  at 333 K

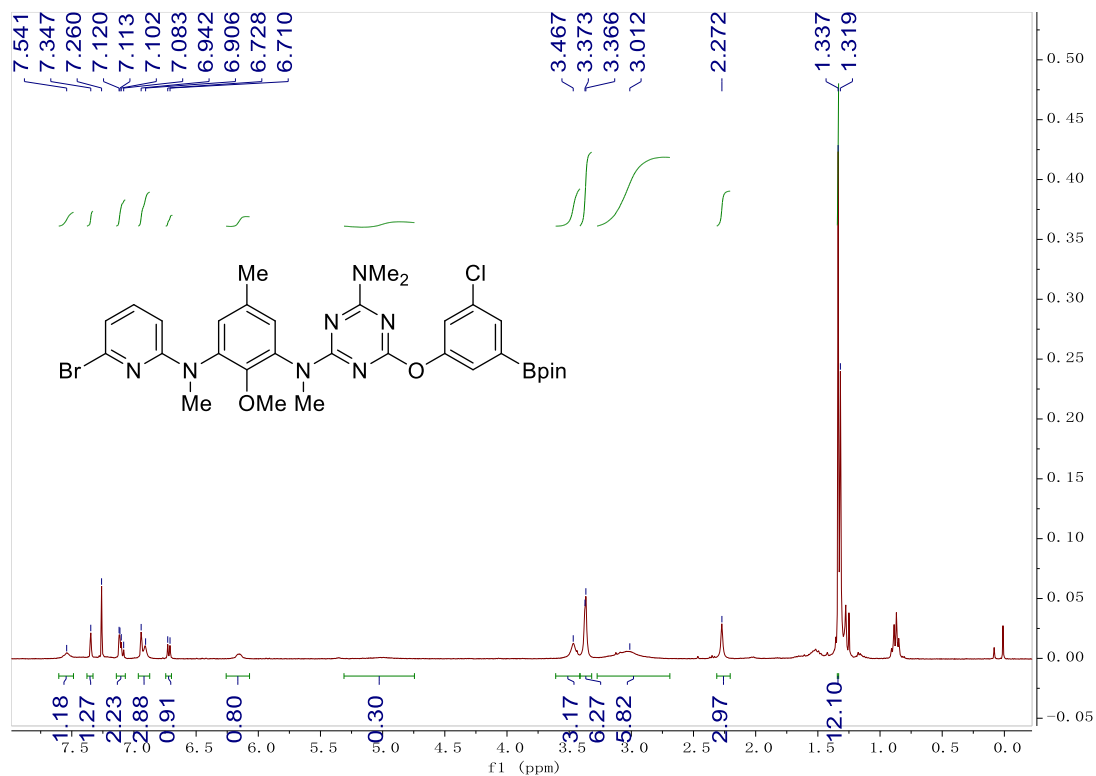

$^{13}\text{C}$  NMR spectrum of **6aa** in  $\text{CDCl}_3$  at 333 K

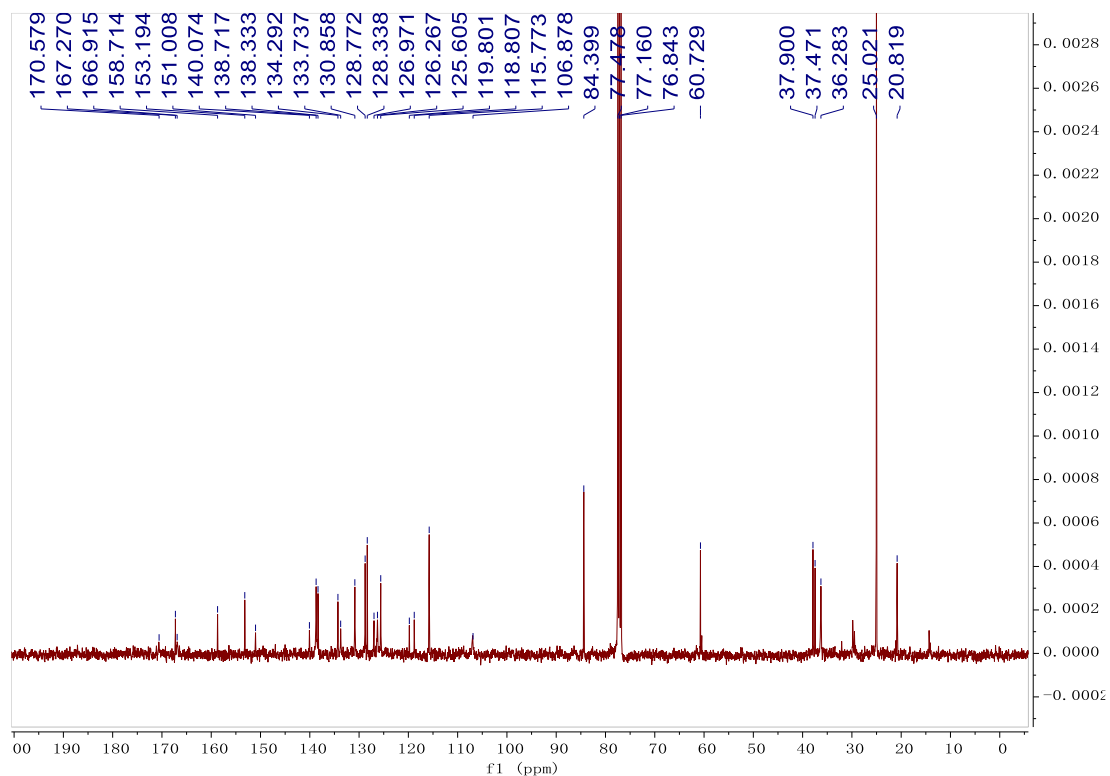

$^1\text{H}$  NMR spectrum of **6ab** in  $\text{DMSO-}d_6$  at 373 K

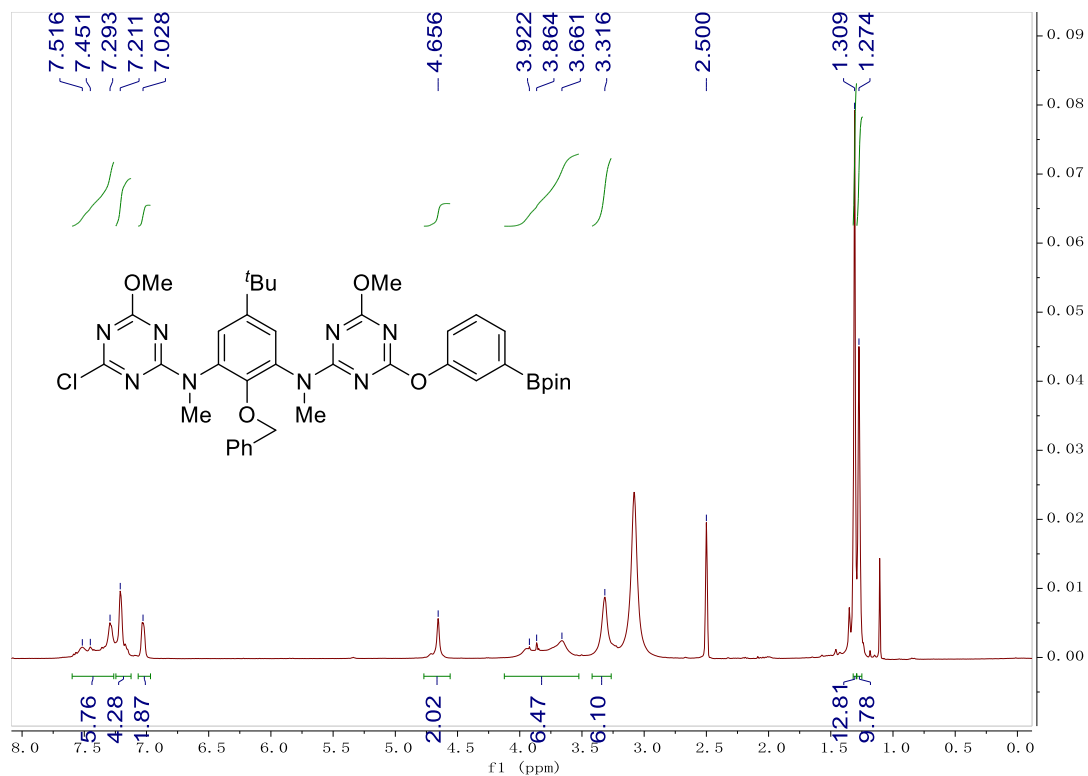

$^{13}\text{C}$  NMR spectrum of **6ab** in  $\text{DMSO-}d_6$  at 373 K

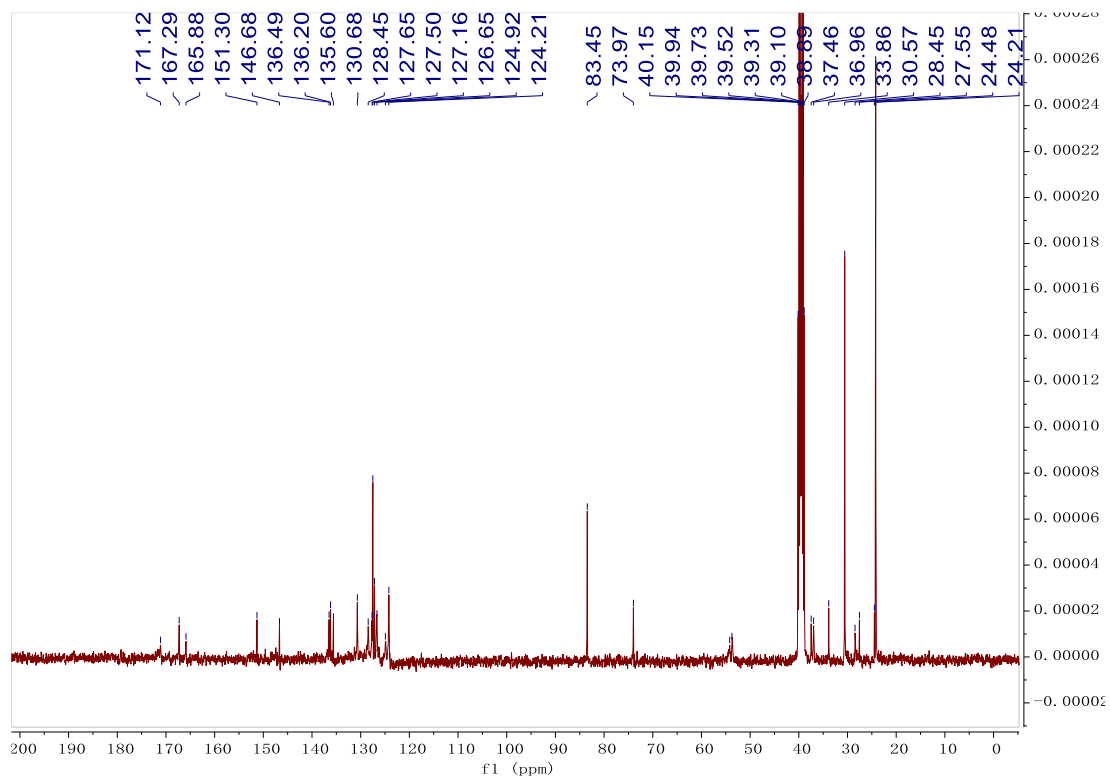

$^1\text{H}$  NMR spectrum of **6ac** in  $\text{CDCl}_3$  at 333 K

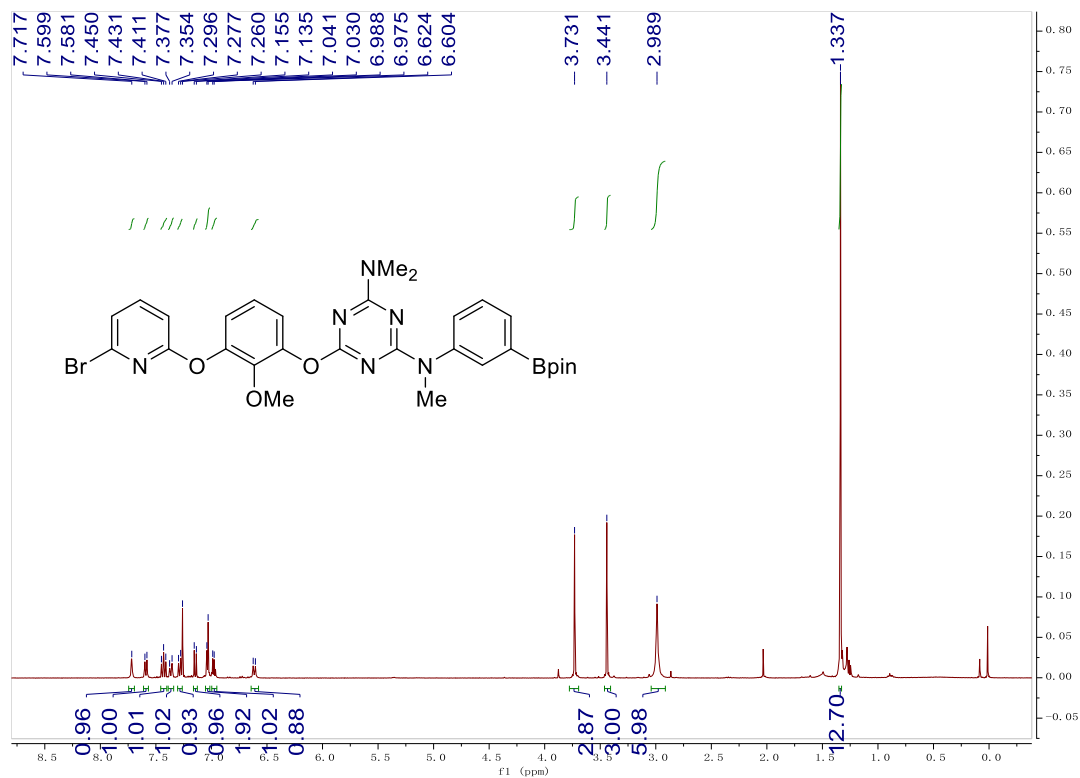

$^{13}\text{C}$  NMR spectrum of **6ac** in  $\text{CDCl}_3$  at 333 K

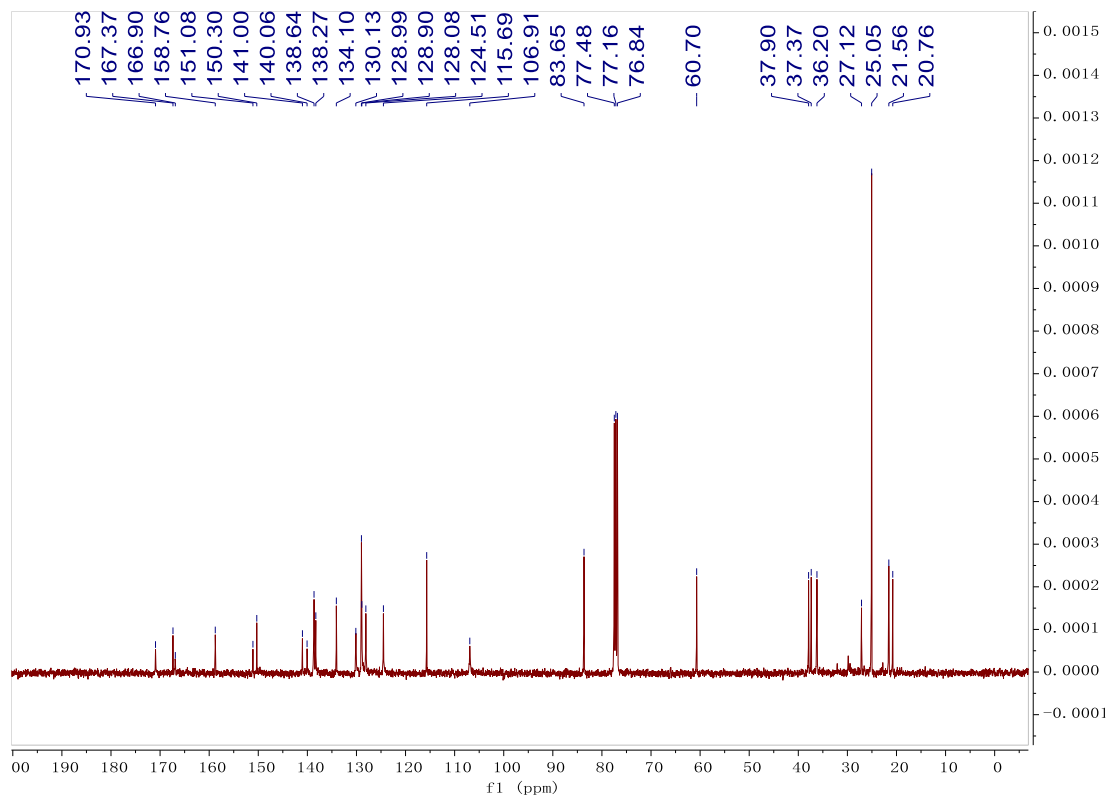

$^1\text{H}$  NMR spectrum of **6ad** in  $\text{CDCl}_3$  at 298 K

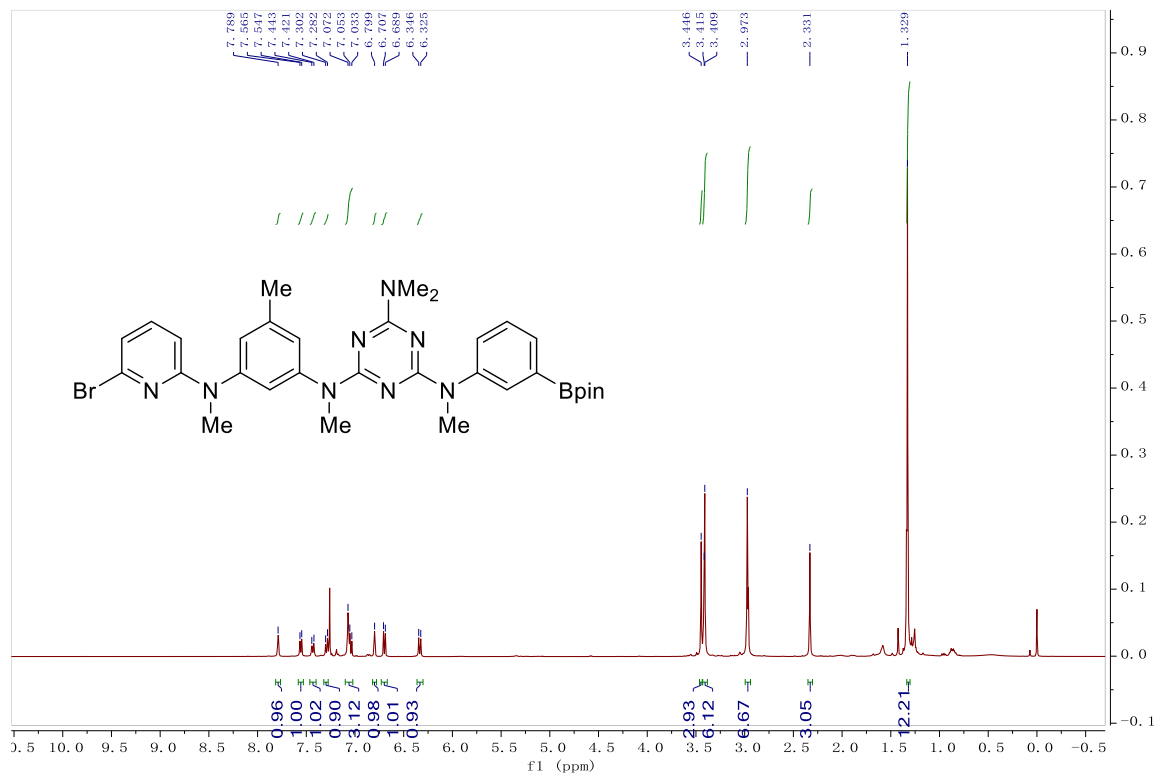

$^{13}\text{C}$  NMR spectrum of **6ad** in  $\text{CDCl}_3$  at 333 K

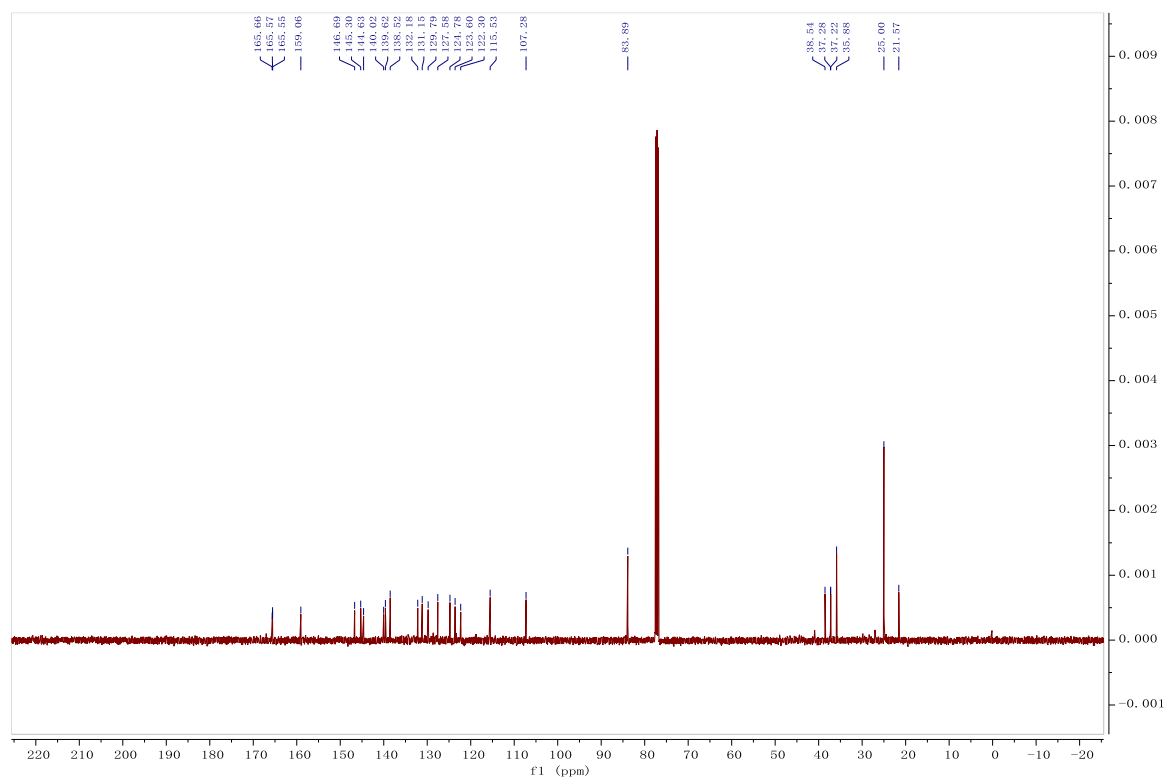



$^1\text{H}$  NMR spectrum of **5a** in  $\text{CDCl}_3$  at 298 K

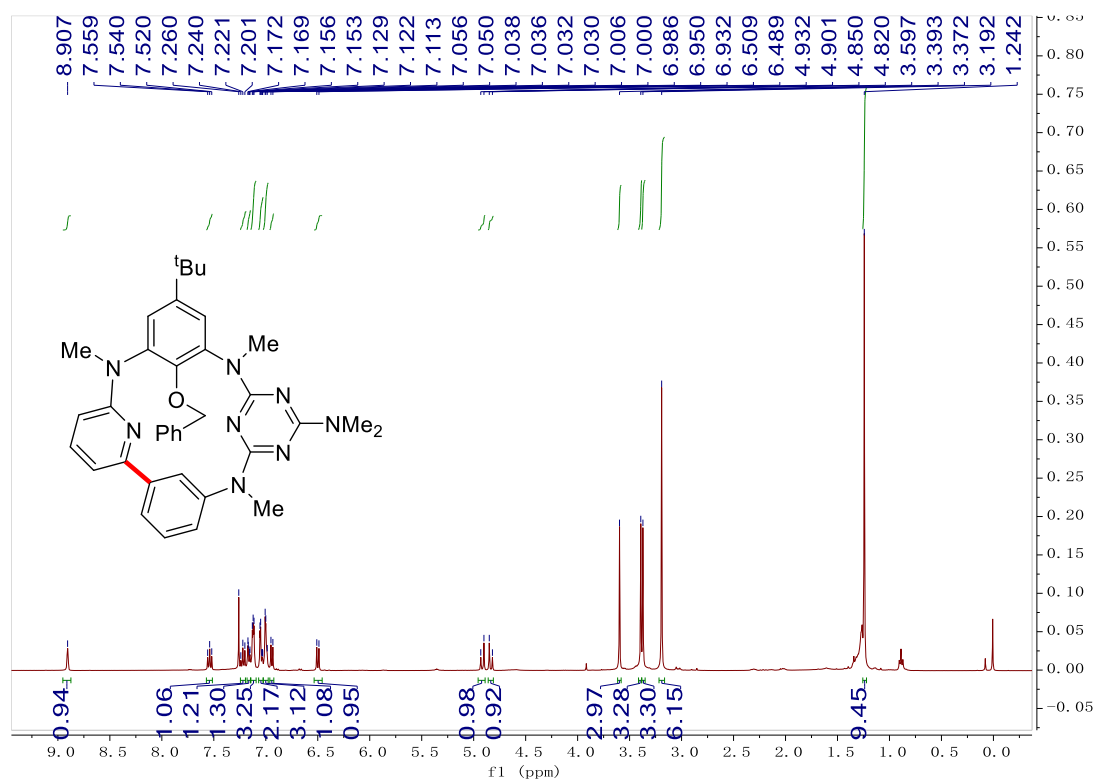

$^{13}\text{C}$  NMR spectrum of **5a** in  $\text{CDCl}_3$  at 298 K

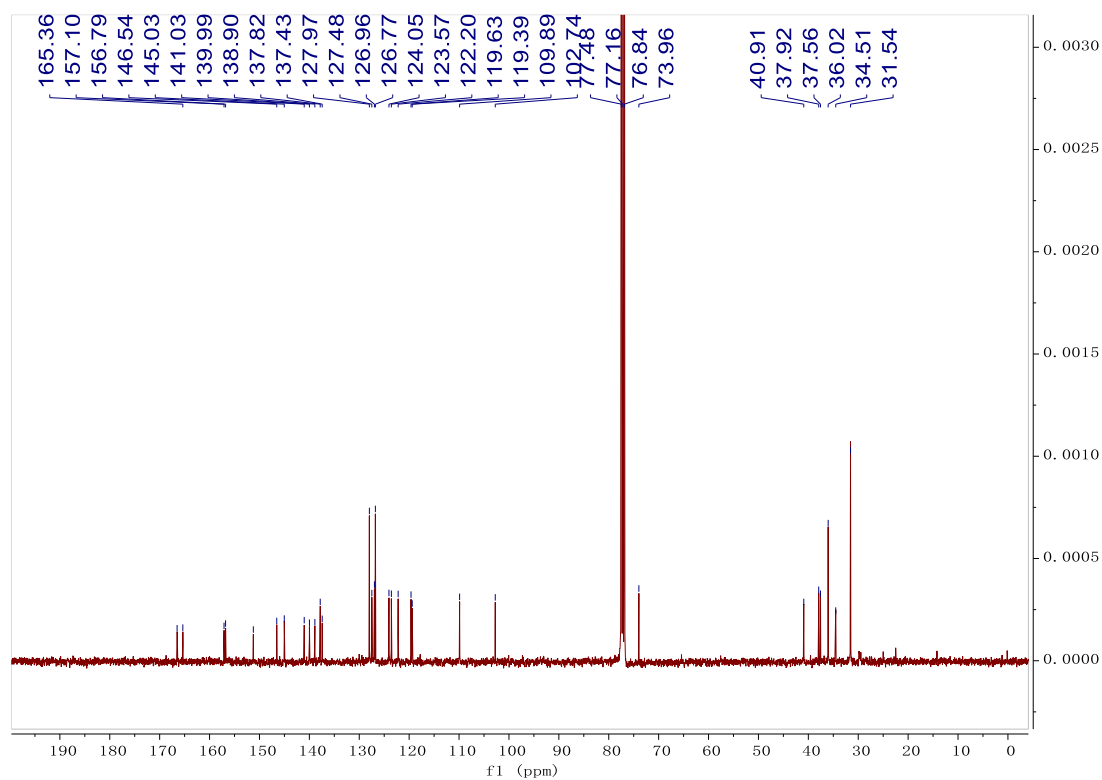

$^1\text{H}$  NMR spectrum of **5b** in  $\text{CDCl}_3$  at 298 K

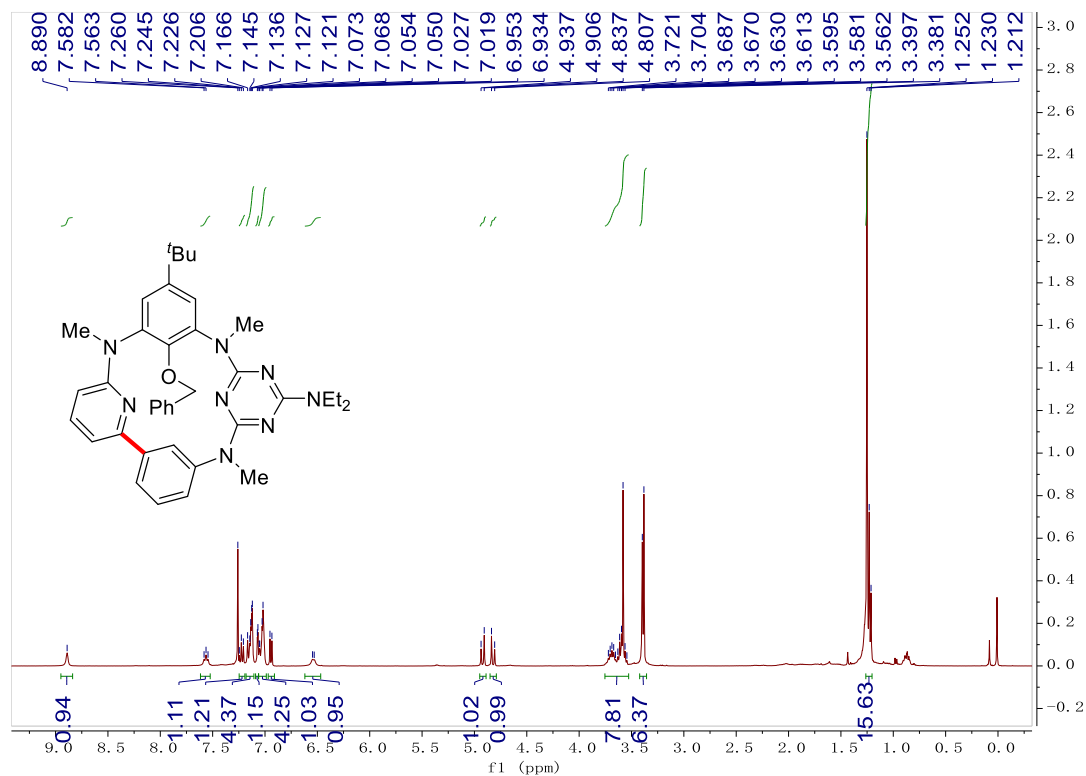

$^{13}\text{C}$  NMR spectrum of **5b** in  $\text{CDCl}_3$  at 298 K

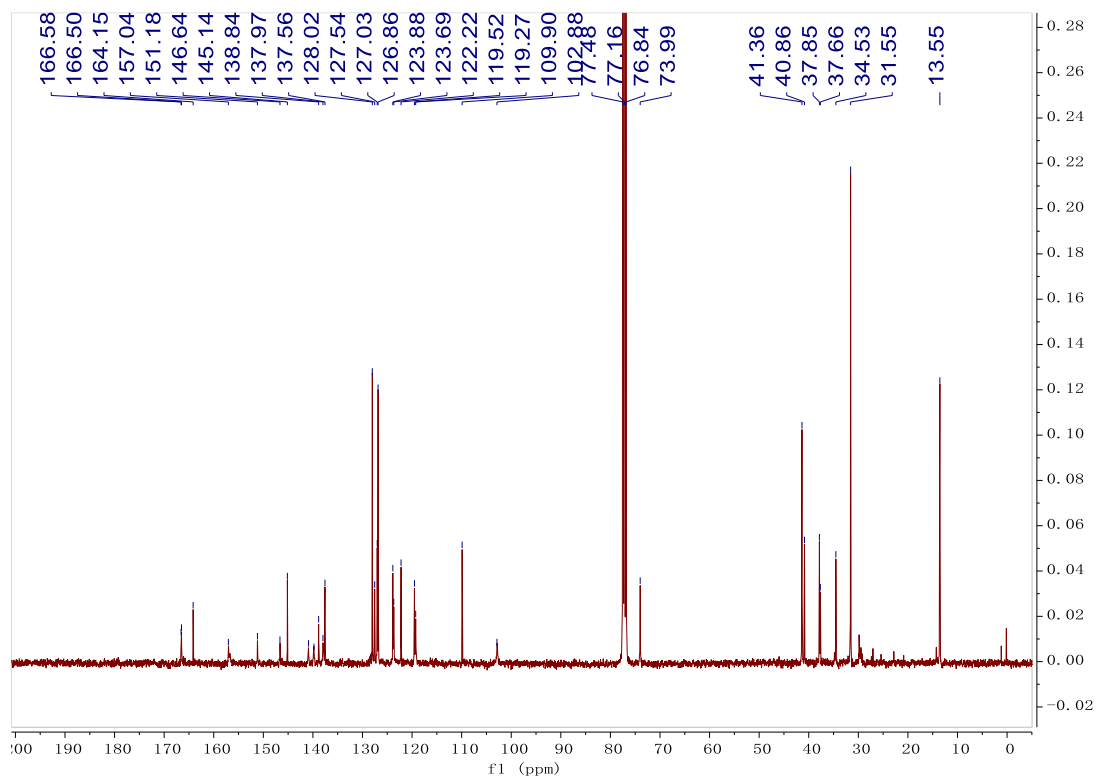

$^1\text{H}$  NMR spectrum of **5c** in  $\text{CDCl}_3$  at 298 K

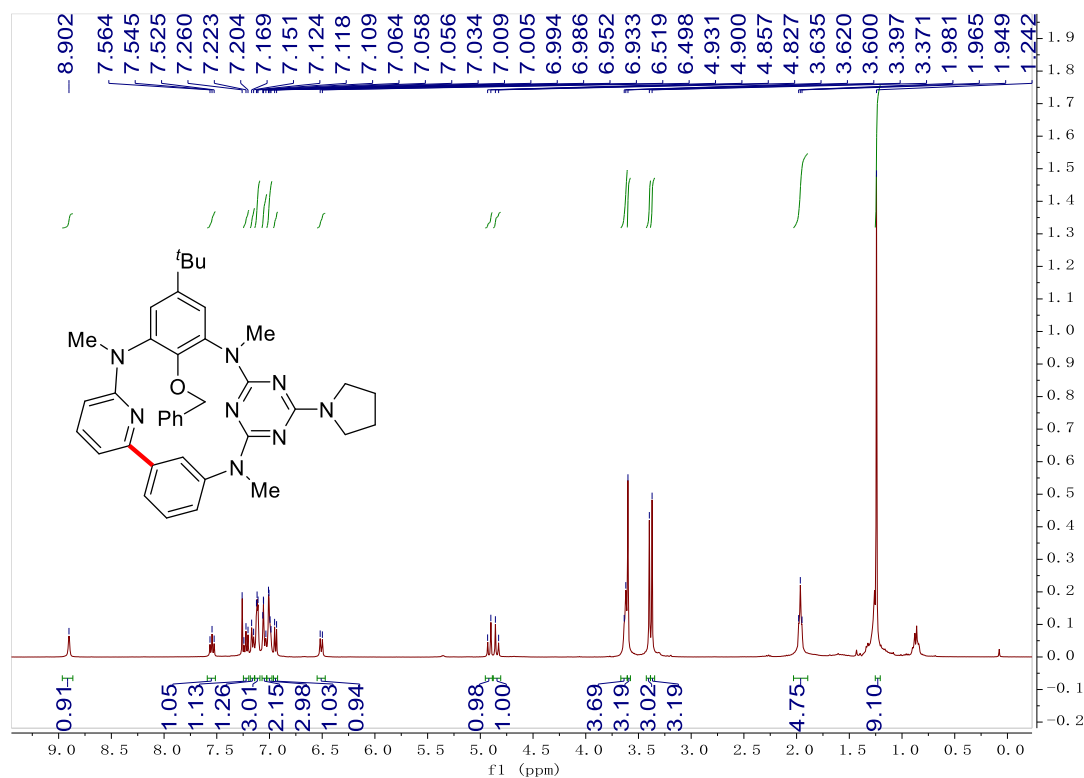

$^{13}\text{C}$  NMR spectrum of **5c** in  $\text{CDCl}_3$  at 298 K

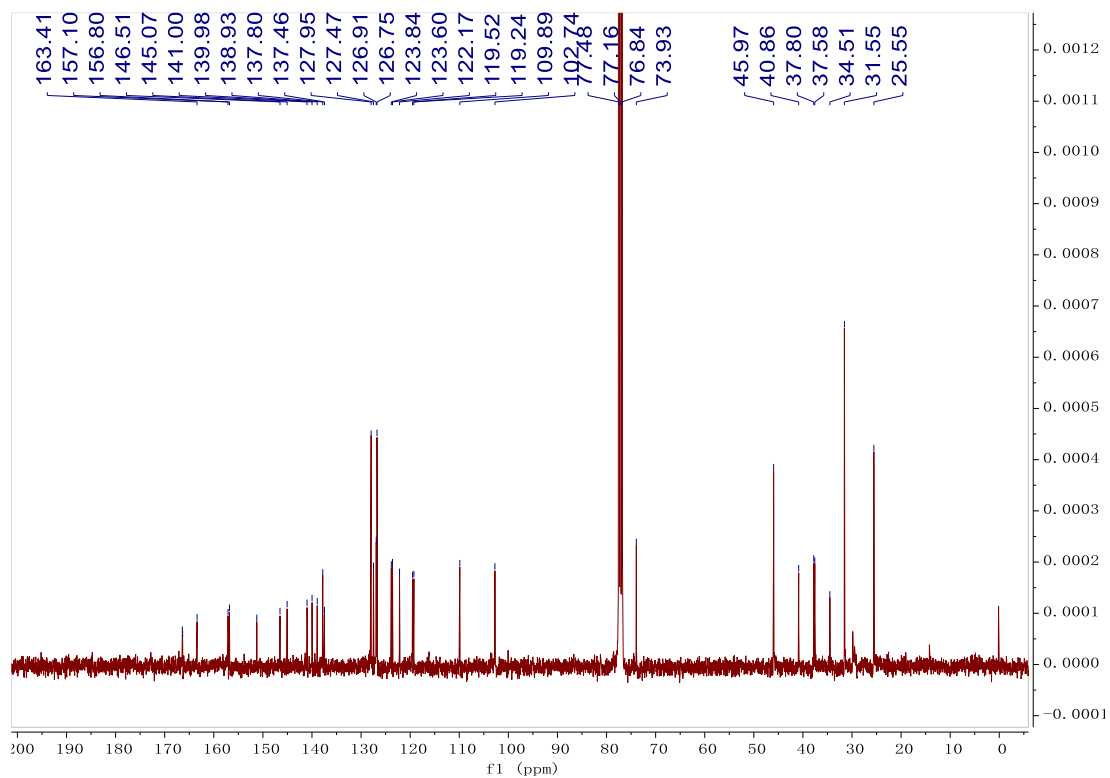

$^1\text{H}$  NMR spectrum of **5d** in acetone- $d_6$  at 298 K

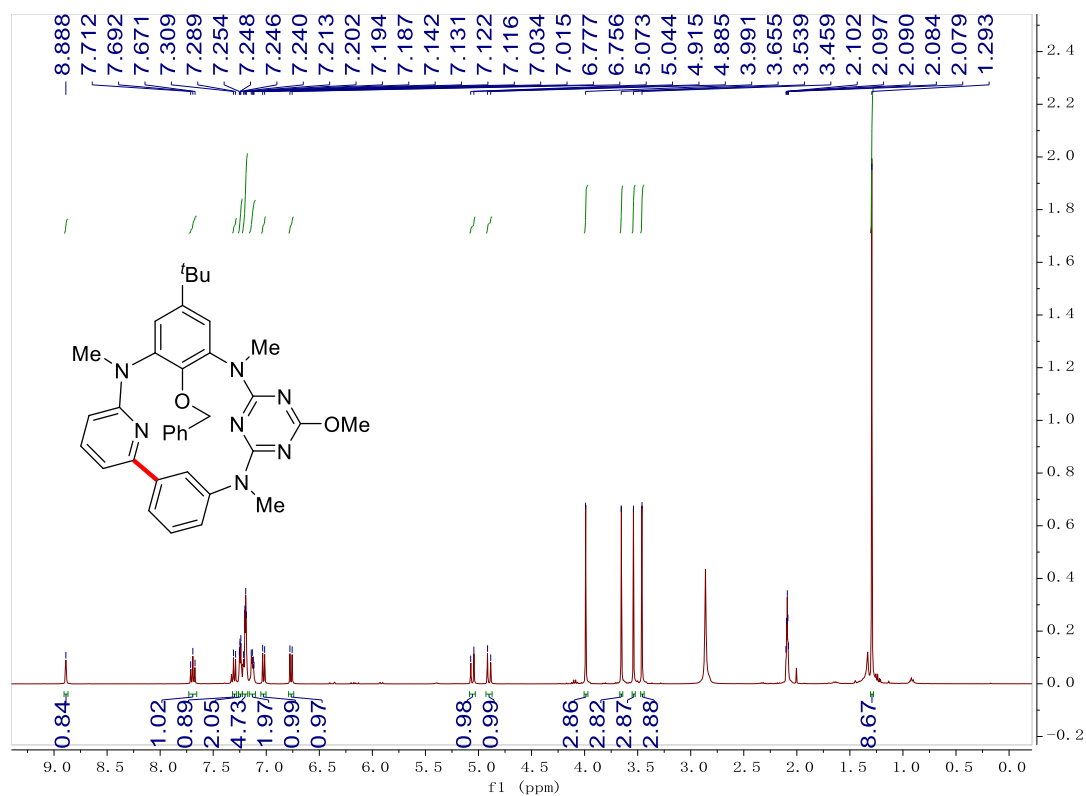

$^{13}\text{C}$  NMR spectrum of **5d** in acetone- $d_6$  at 298 K

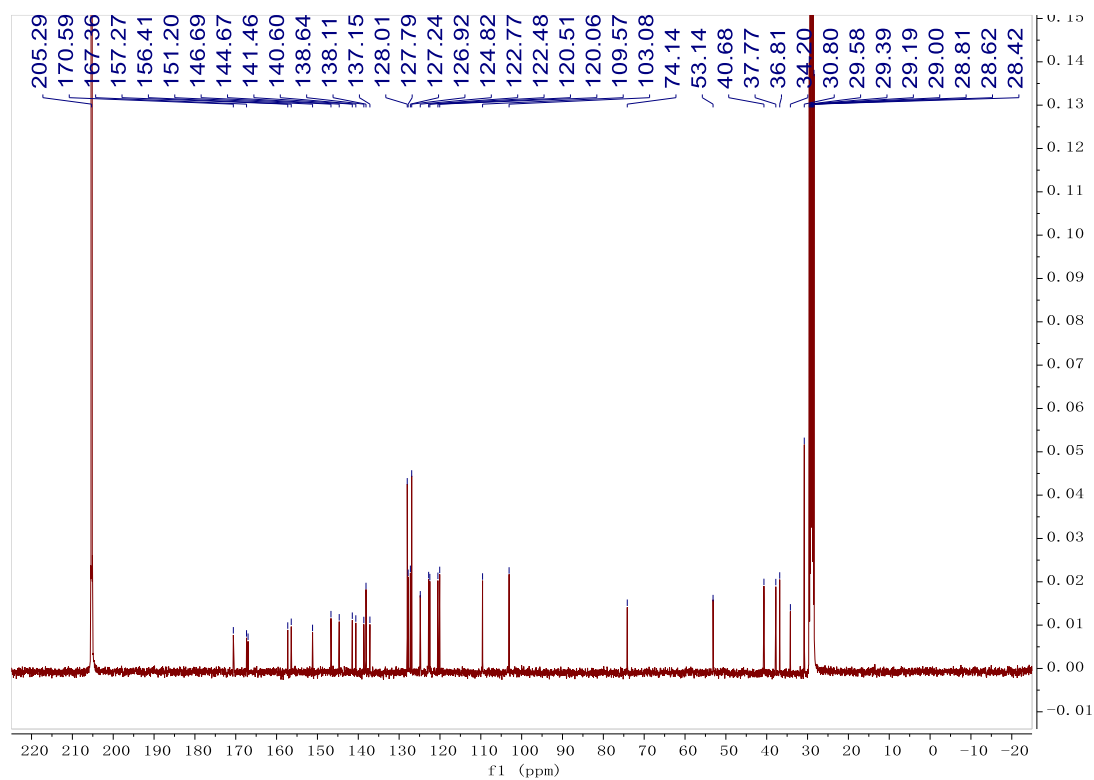

$^1\text{H}$  NMR spectrum of **5e** in  $\text{CDCl}_3$  at 298 K

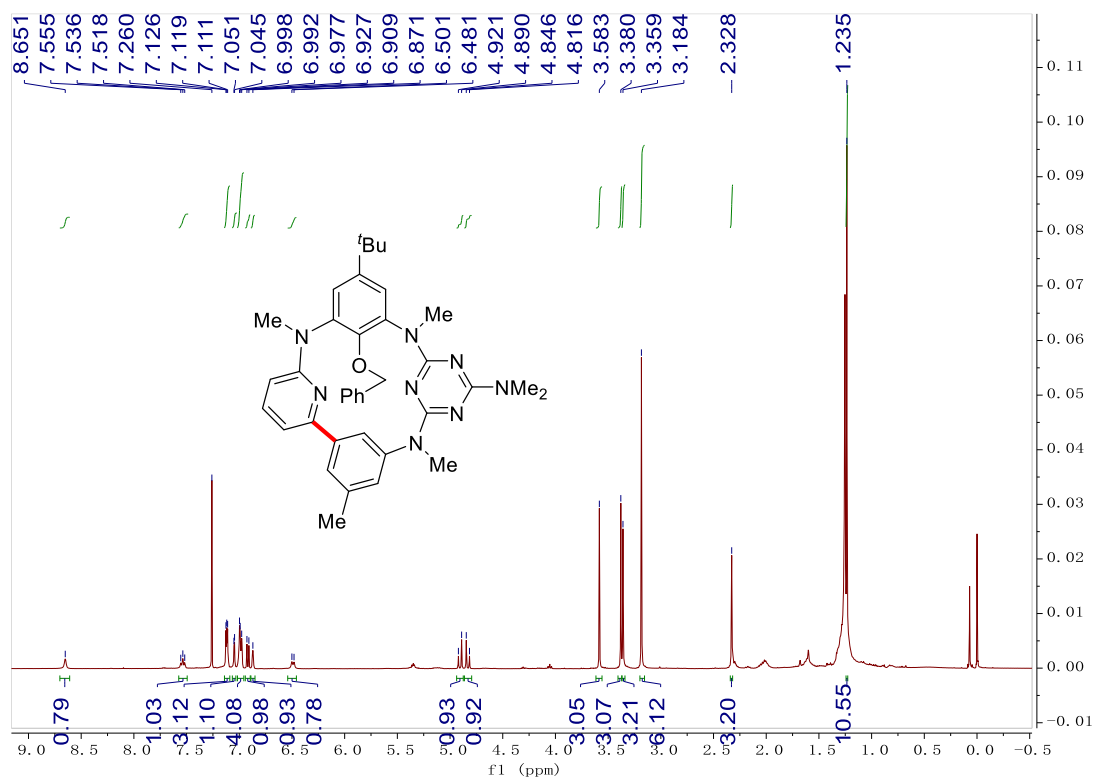

$^{13}\text{C}$  NMR spectrum of **5e** in  $\text{CDCl}_3$  at 298 K

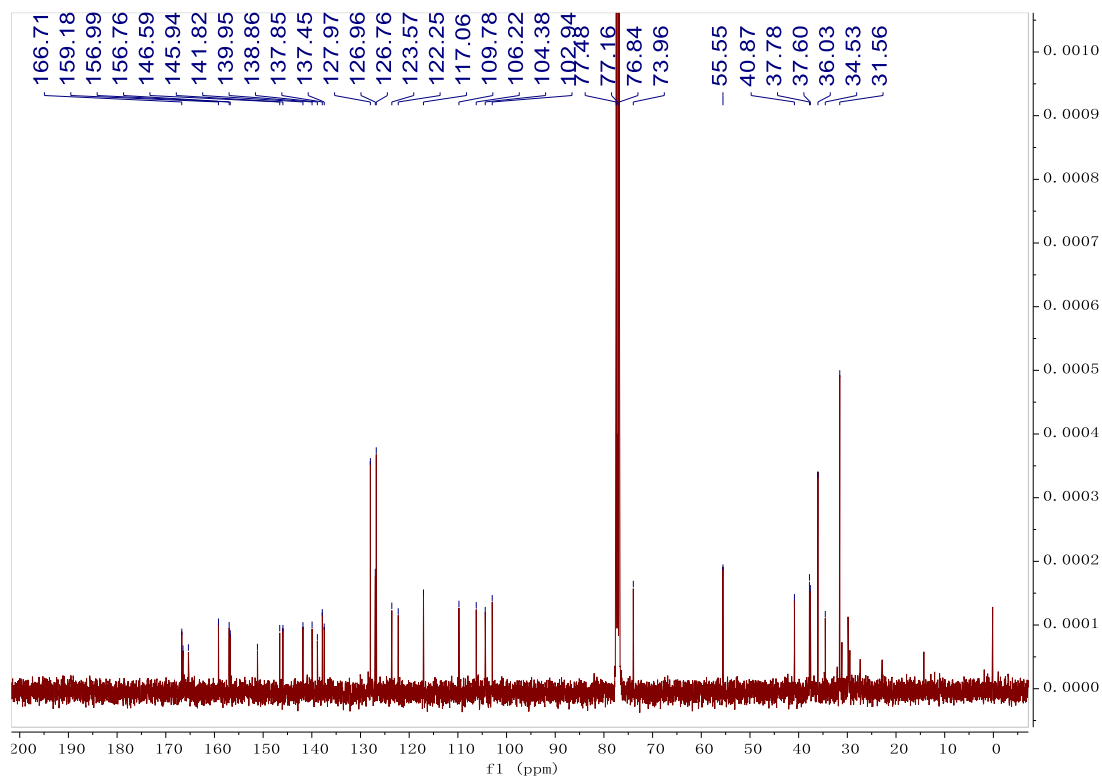

$^1\text{H}$  NMR spectrum of **5f** in  $\text{CDCl}_3$  at 298 K

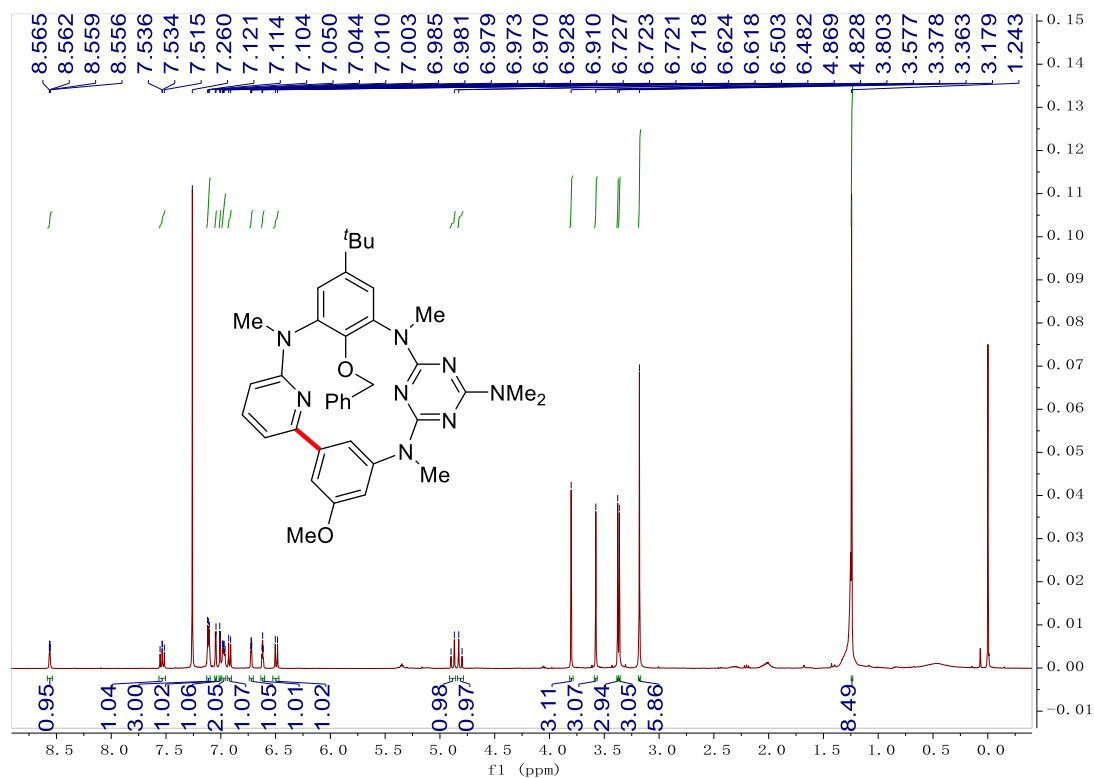

$^{13}\text{C}$  NMR spectrum of **5f** in  $\text{CDCl}_3$  at 298 K

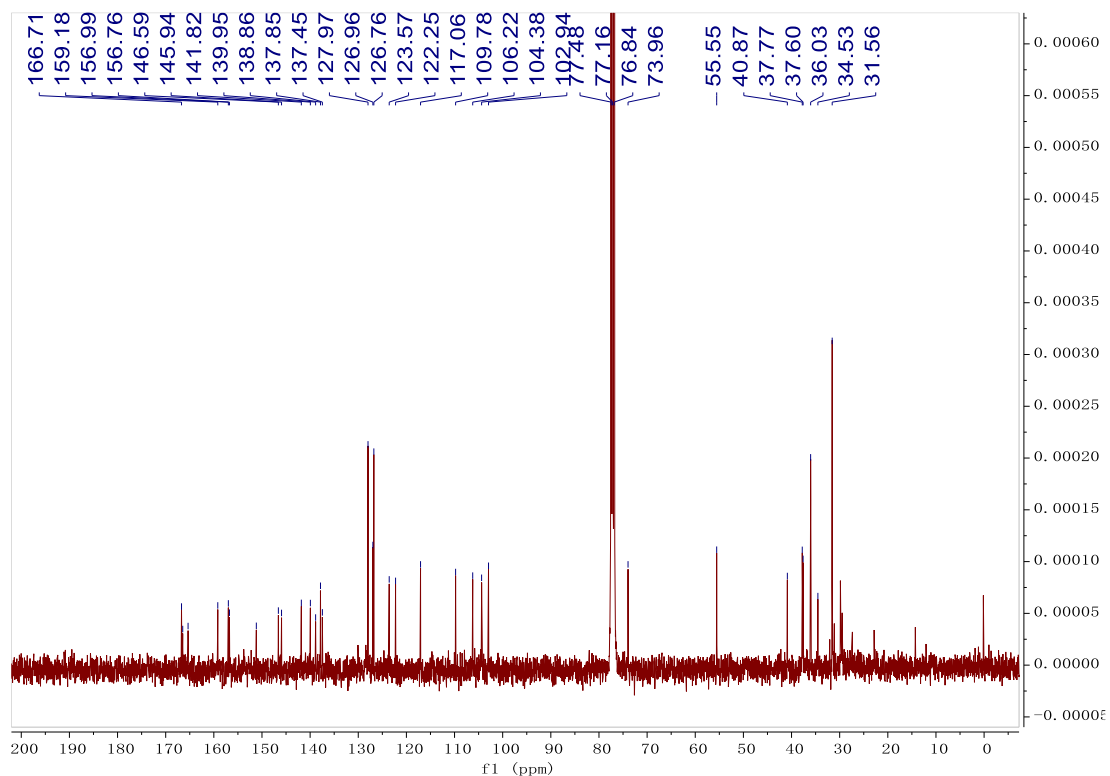

$^1\text{H}$  NMR spectrum of **5g** in  $\text{CDCl}_3$  at 298 K

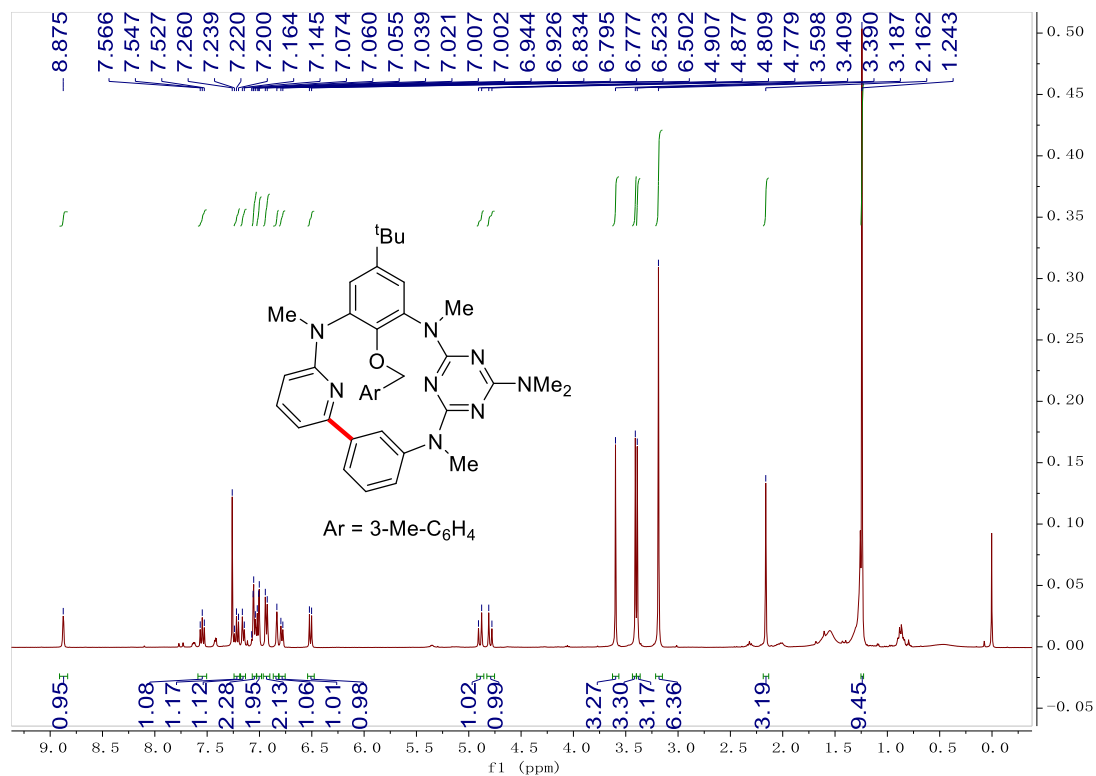

$^{13}\text{C}$  NMR spectrum of **5g** in  $\text{CDCl}_3$  at 298 K

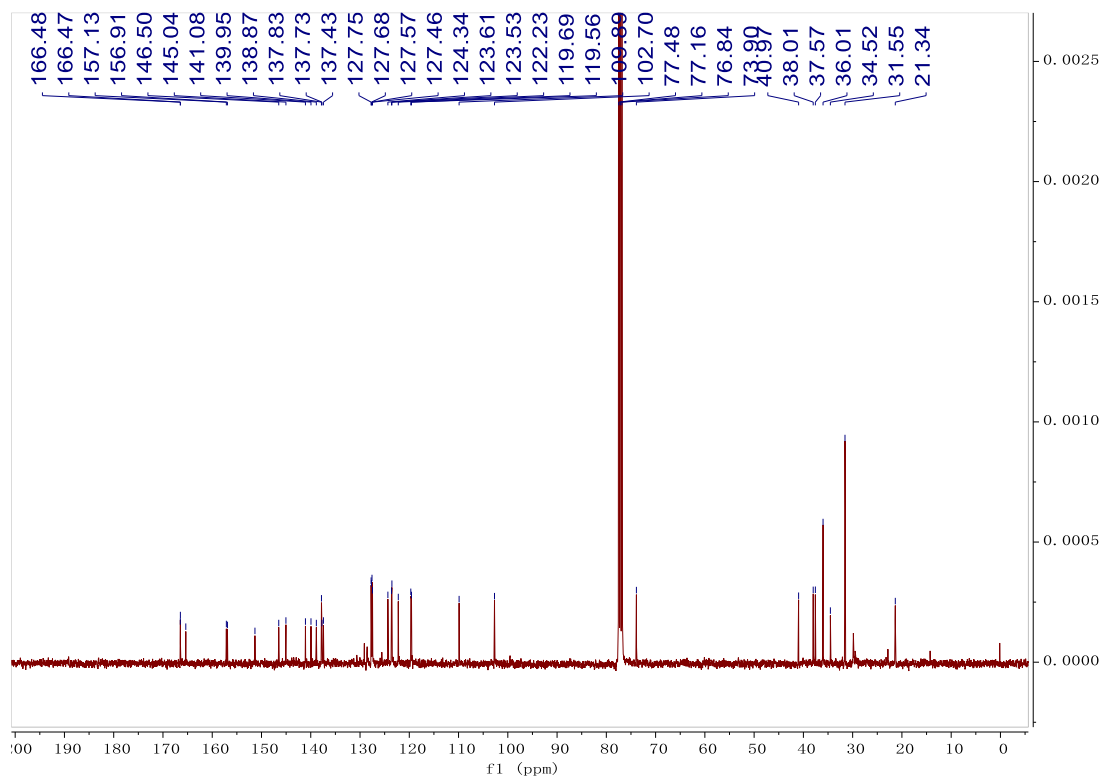

$^1\text{H}$  NMR spectrum of **5h** in  $\text{CDCl}_3$  at 298 K

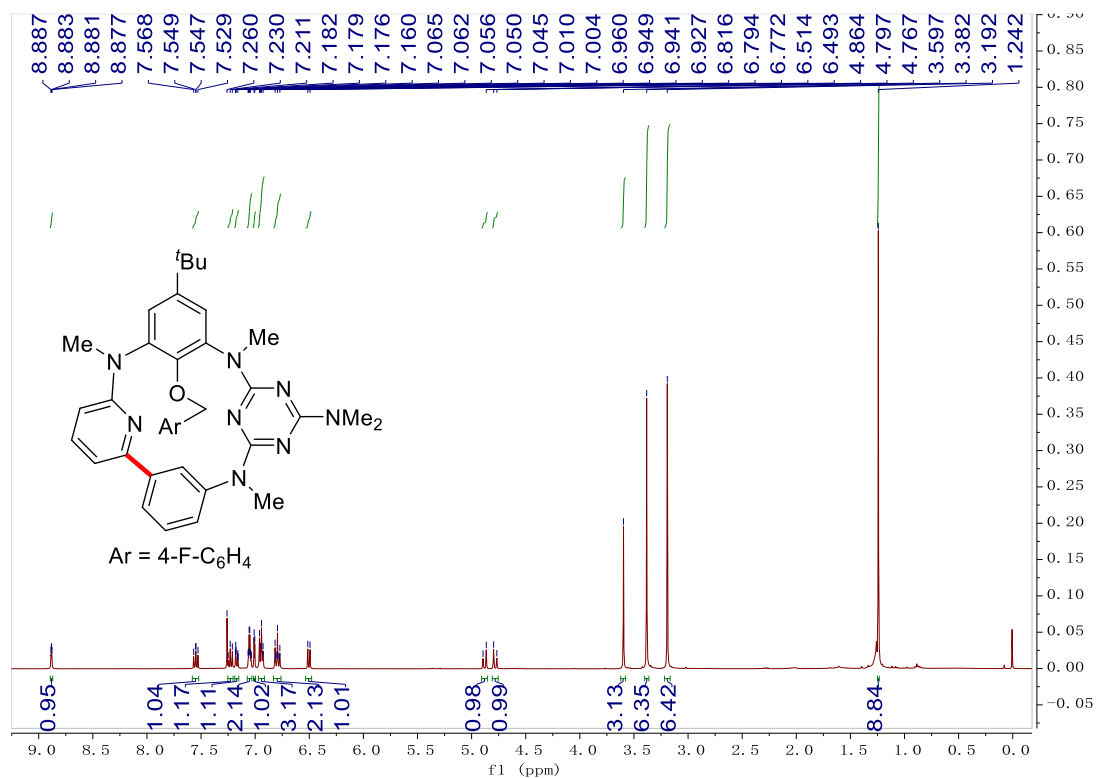

$^{13}\text{C}$  NMR spectrum of **5h** in  $\text{CDCl}_3$  at 298 K

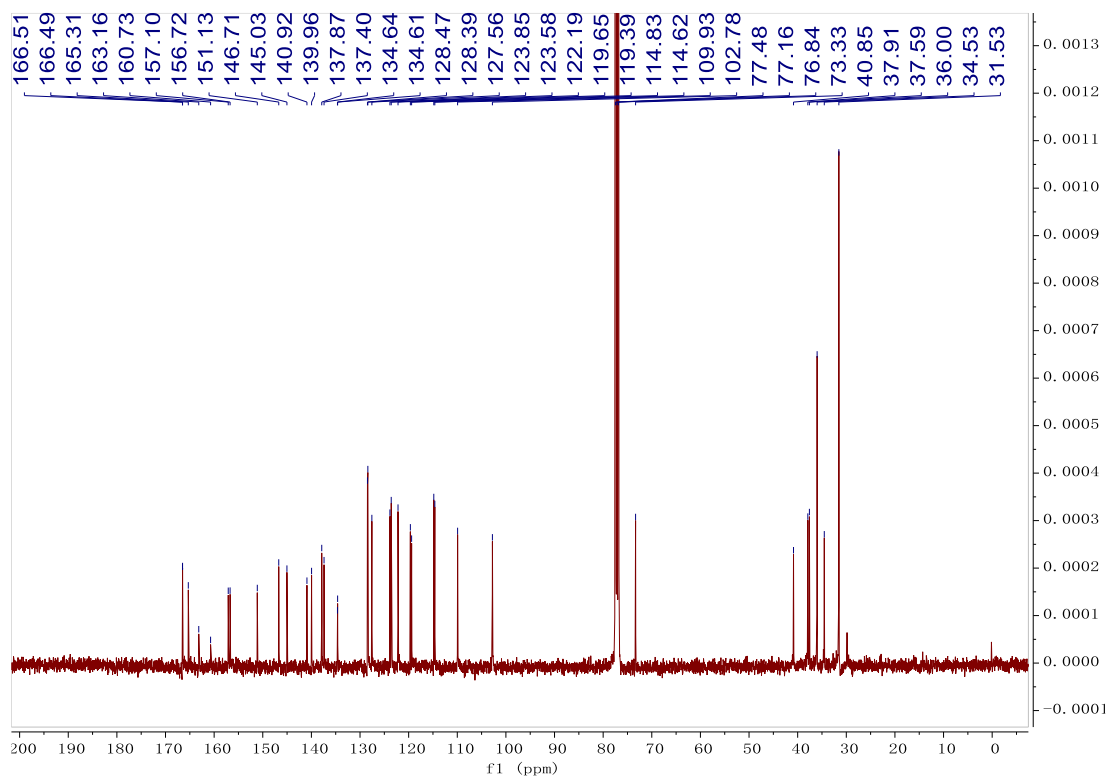



$^1\text{H}$  NMR spectrum of **5i** in  $\text{CDCl}_3$  at 298 K

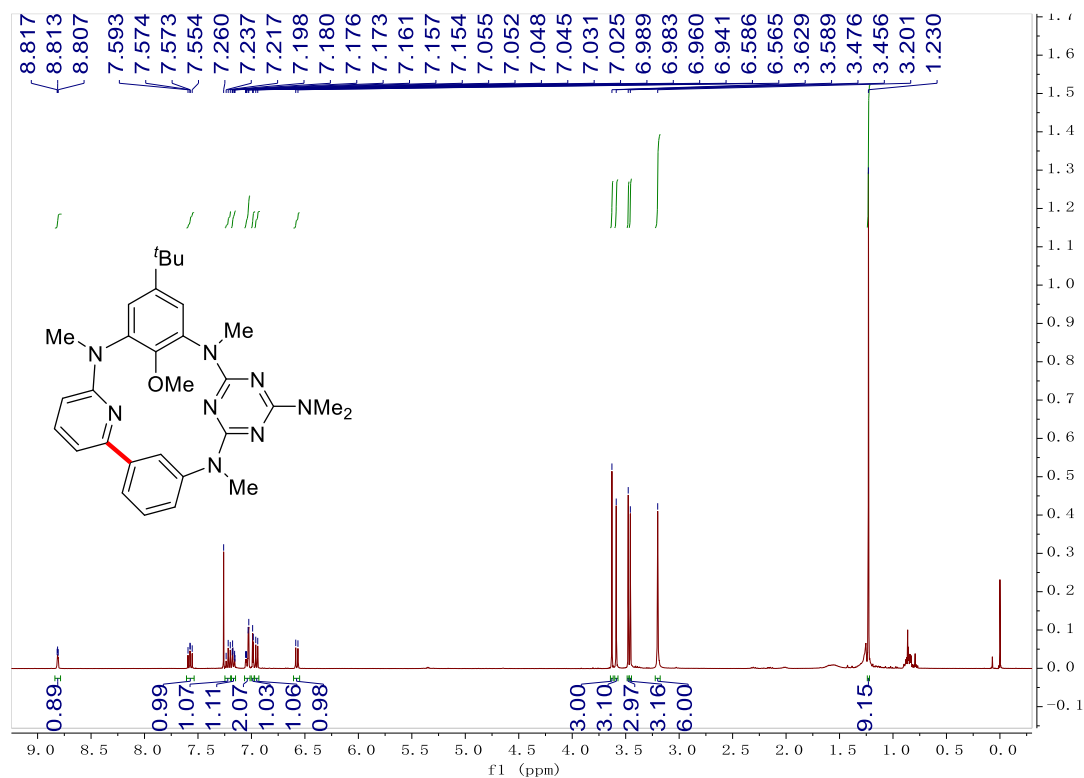

$^{13}\text{C}$  NMR spectrum of **5i** in  $\text{CDCl}_3$  at 298 K

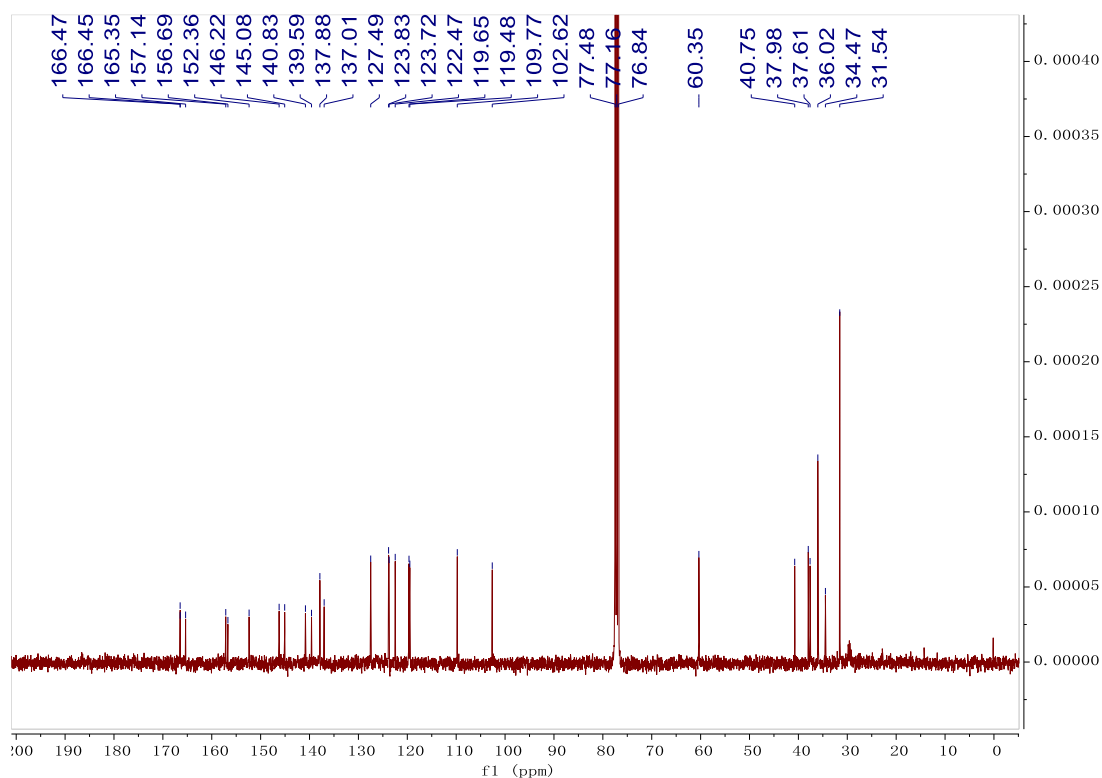

$^1\text{H}$  NMR spectrum of **5j** in  $\text{CDCl}_3$  at 298 K

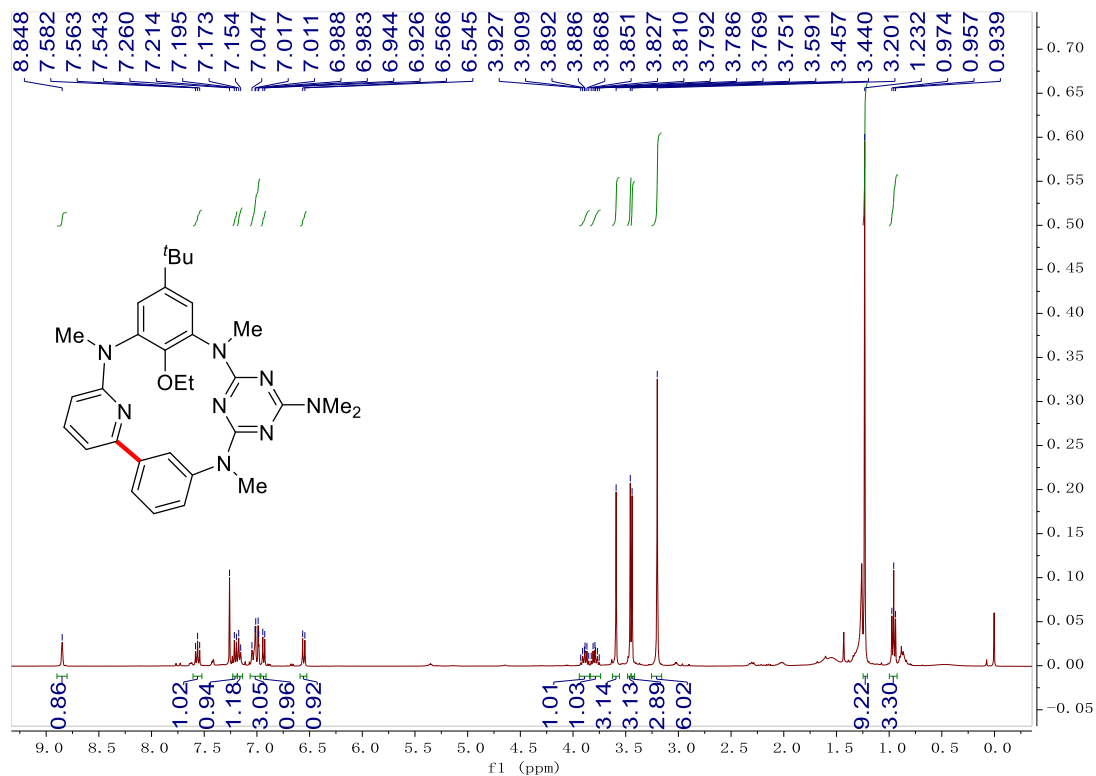

$^{13}\text{C}$  NMR spectrum of **5j** in  $\text{CDCl}_3$  at 298 K

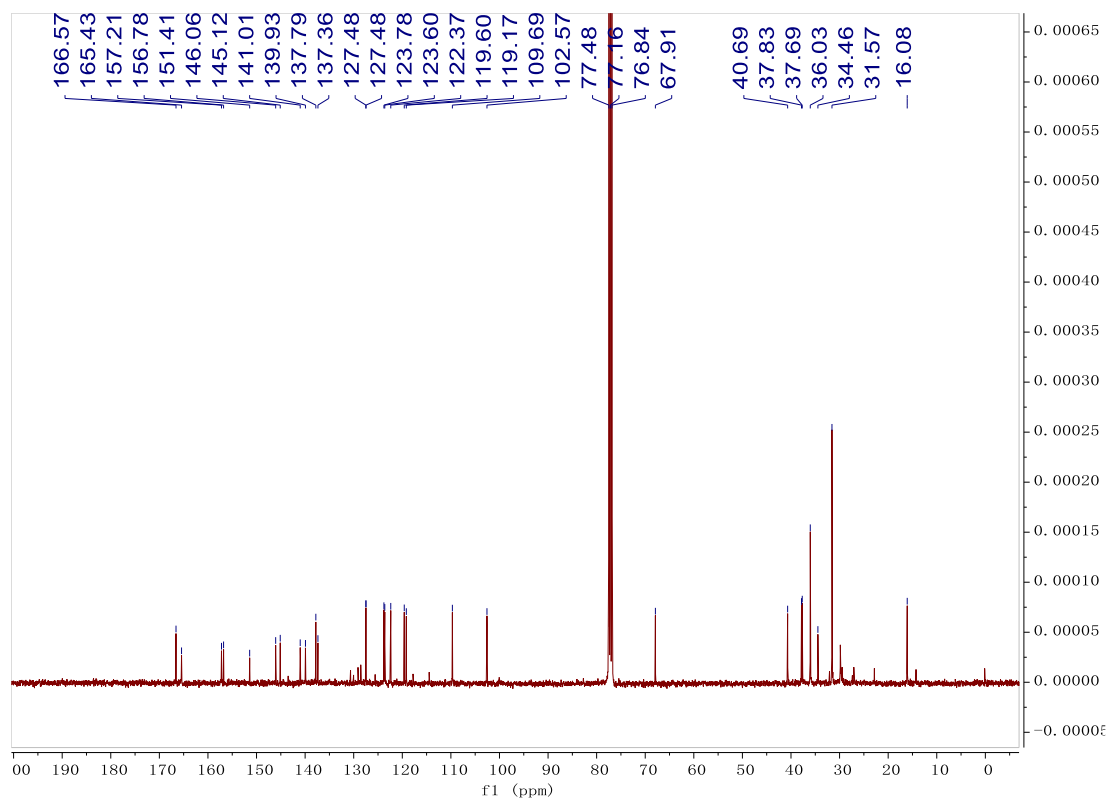

$^1\text{H}$  NMR spectrum of **5k** in  $\text{CDCl}_3$  at 298 K

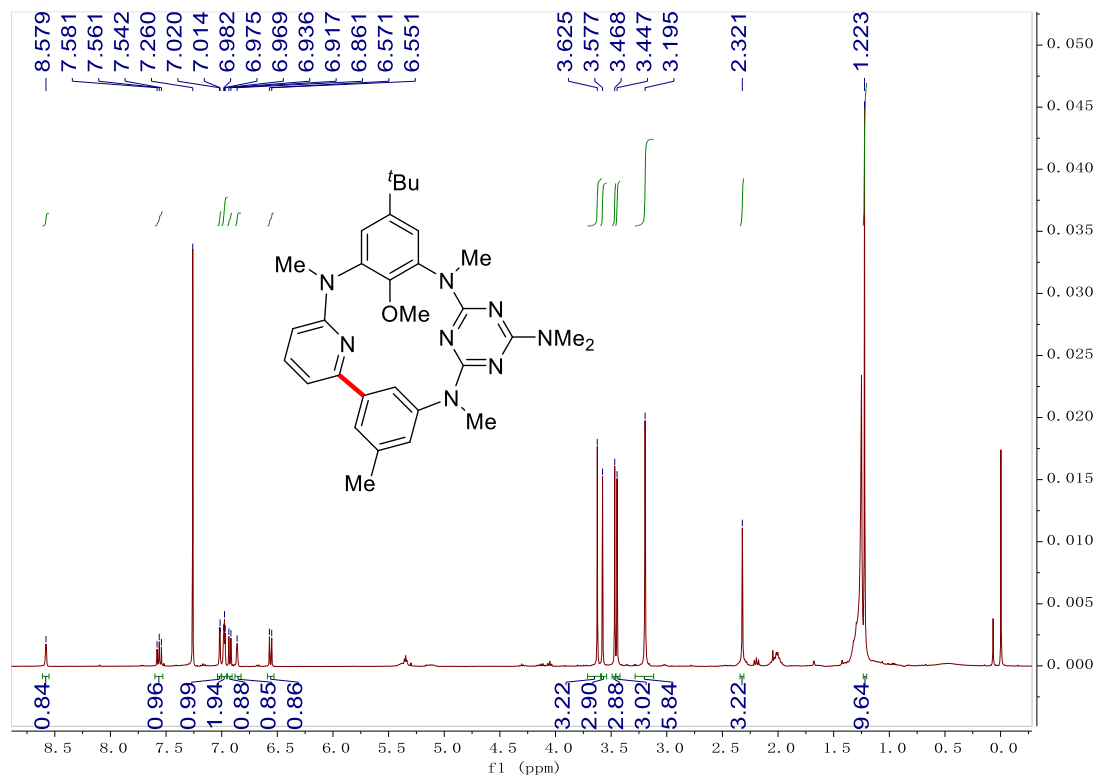

$^{13}\text{C}$  NMR spectrum of **5k** in  $\text{CDCl}_3$  at 298 K

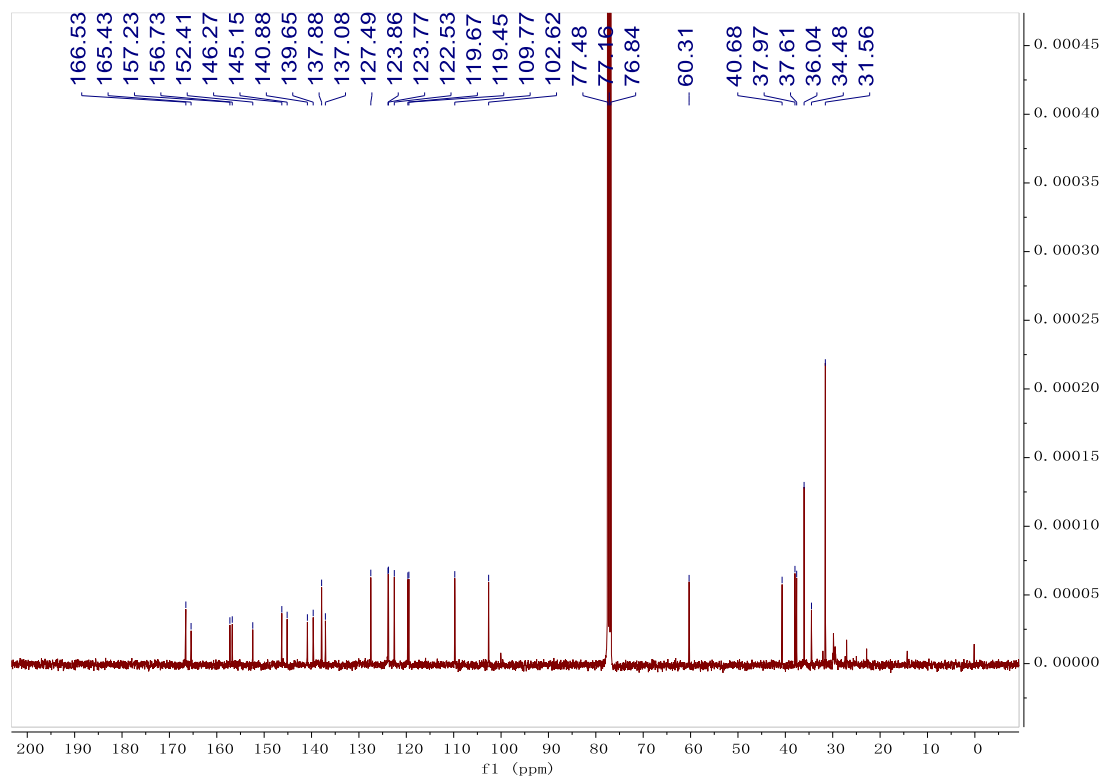

$^1\text{H}$  NMR spectrum of **5I** in  $\text{CDCl}_3$  at 298 K

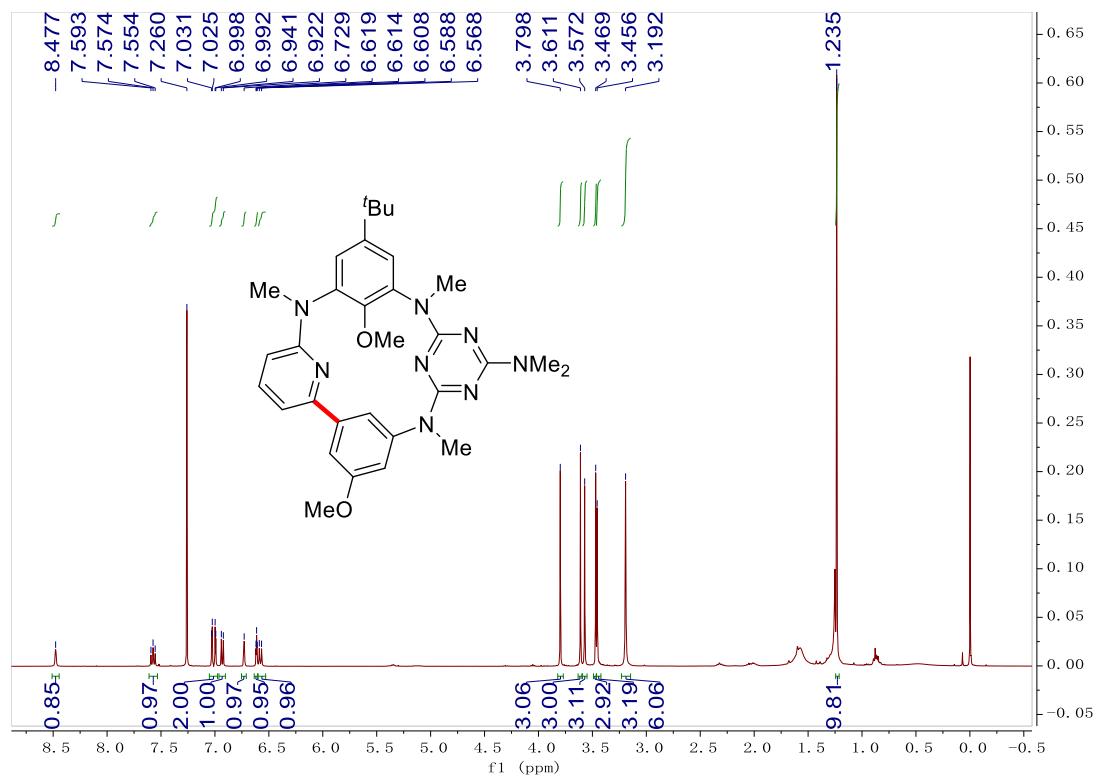

$^{13}\text{C}$  NMR spectrum of **5I** in  $\text{CDCl}_3$  at 298 K

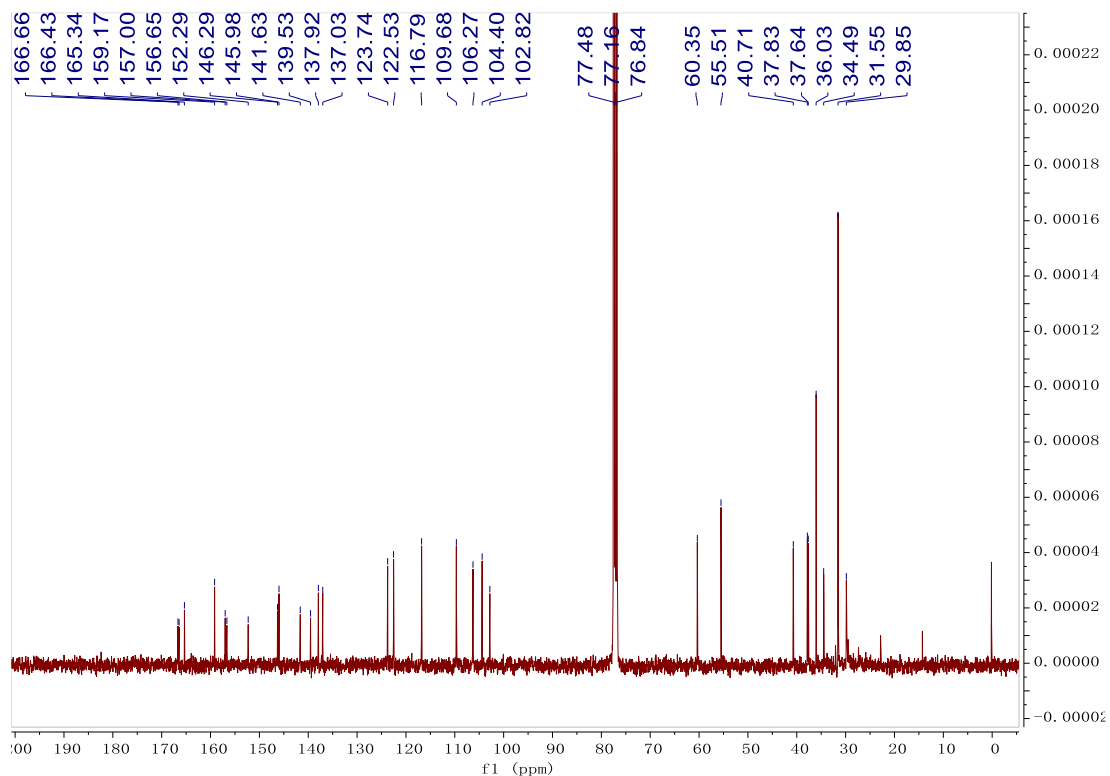

$^1\text{H}$  NMR spectrum of **5m** in  $\text{DMSO-}d_6$  at 298 K

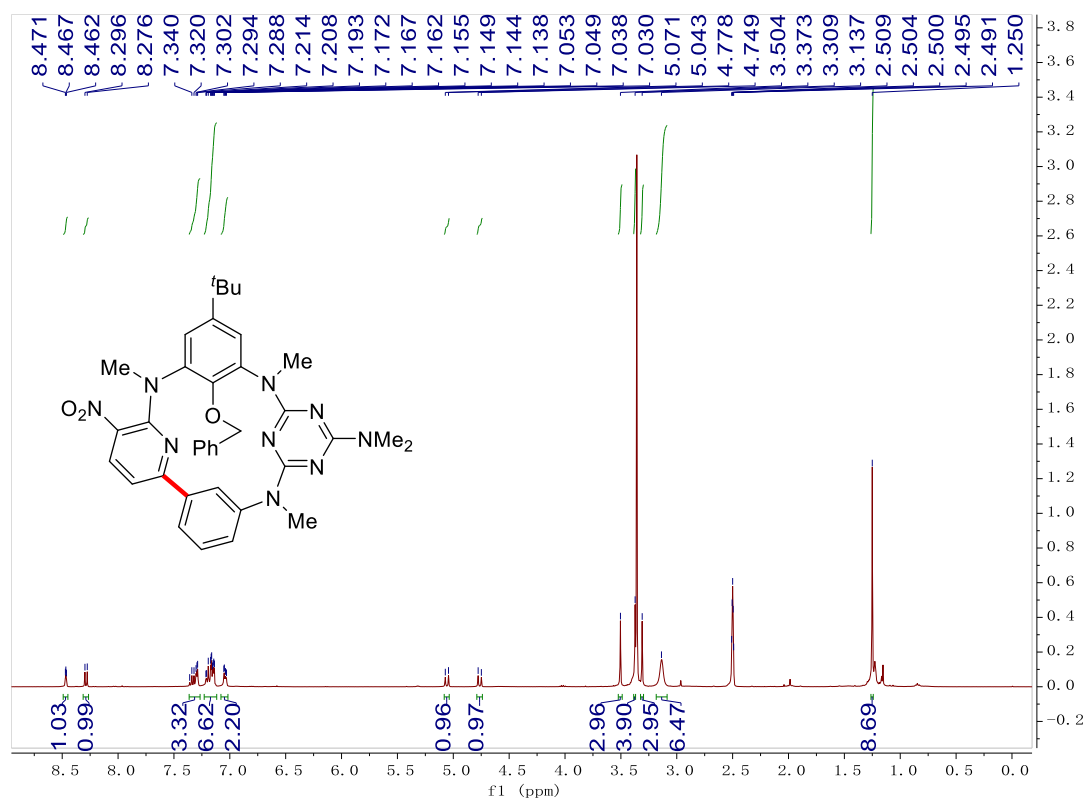

$^{13}\text{C}$  NMR spectrum of **5m** in  $\text{DMSO-}d_6$  at 298 K

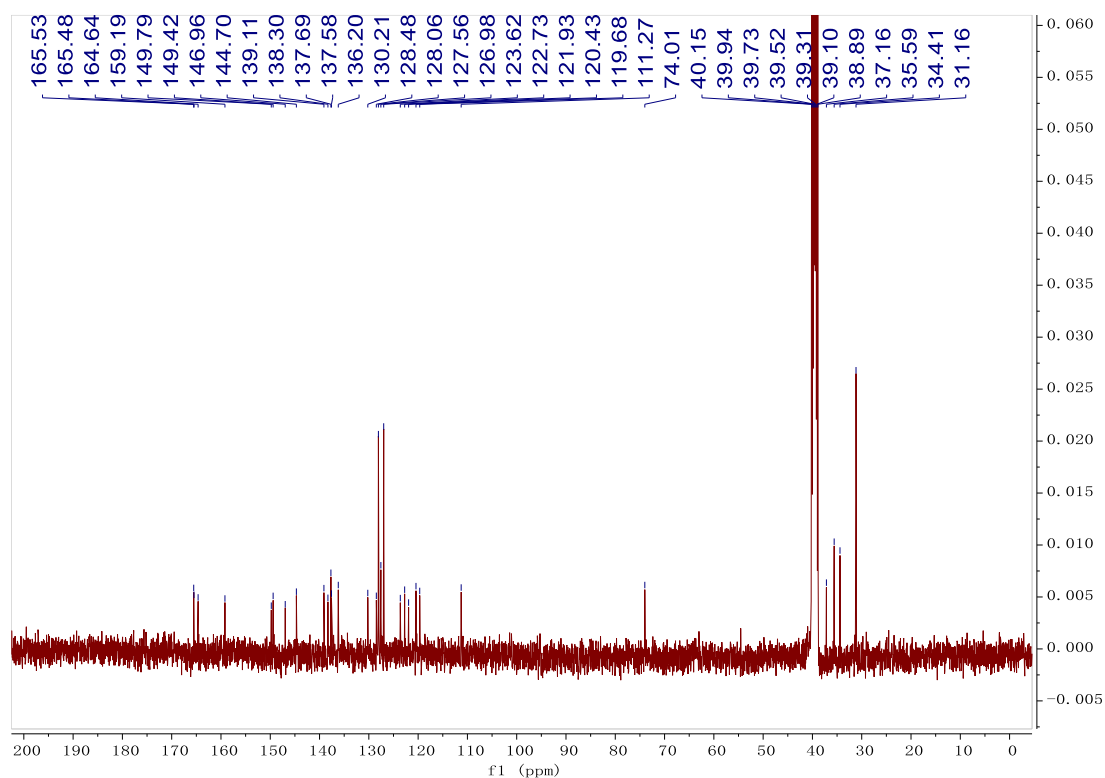

$^1\text{H}$  NMR spectrum of **5n** in  $\text{CDCl}_3$  at 298 K

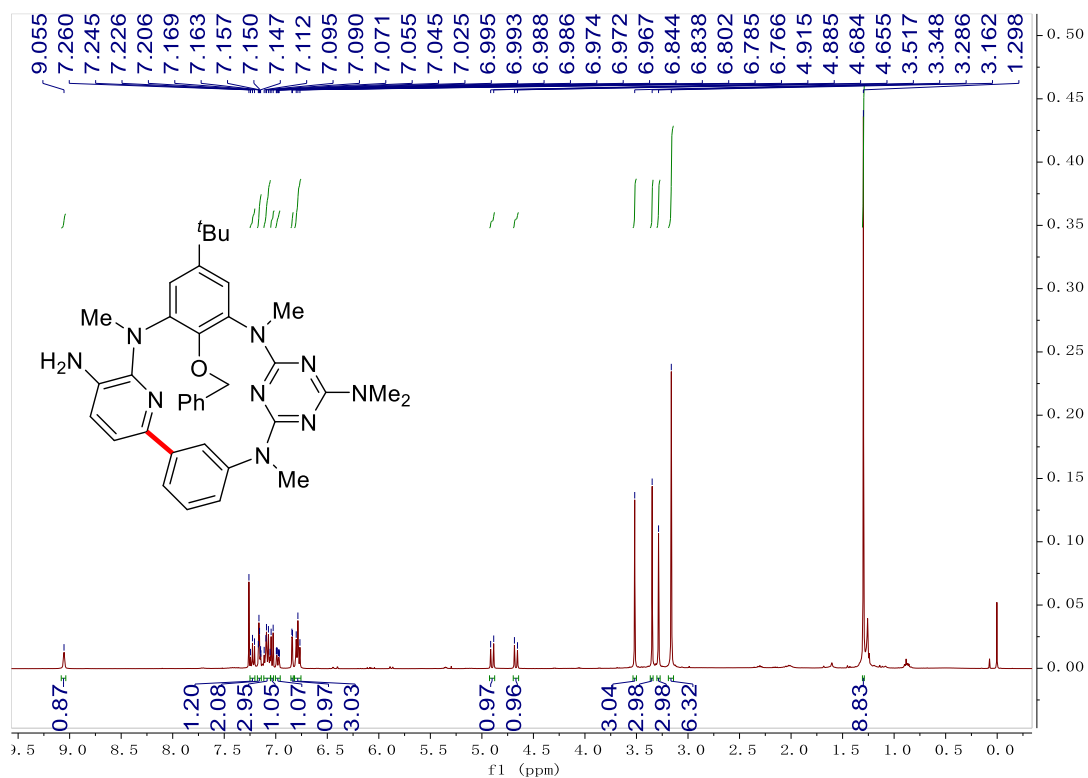

$^{13}\text{C}$  NMR spectrum of **5n** in  $\text{CDCl}_3$  at 298 K

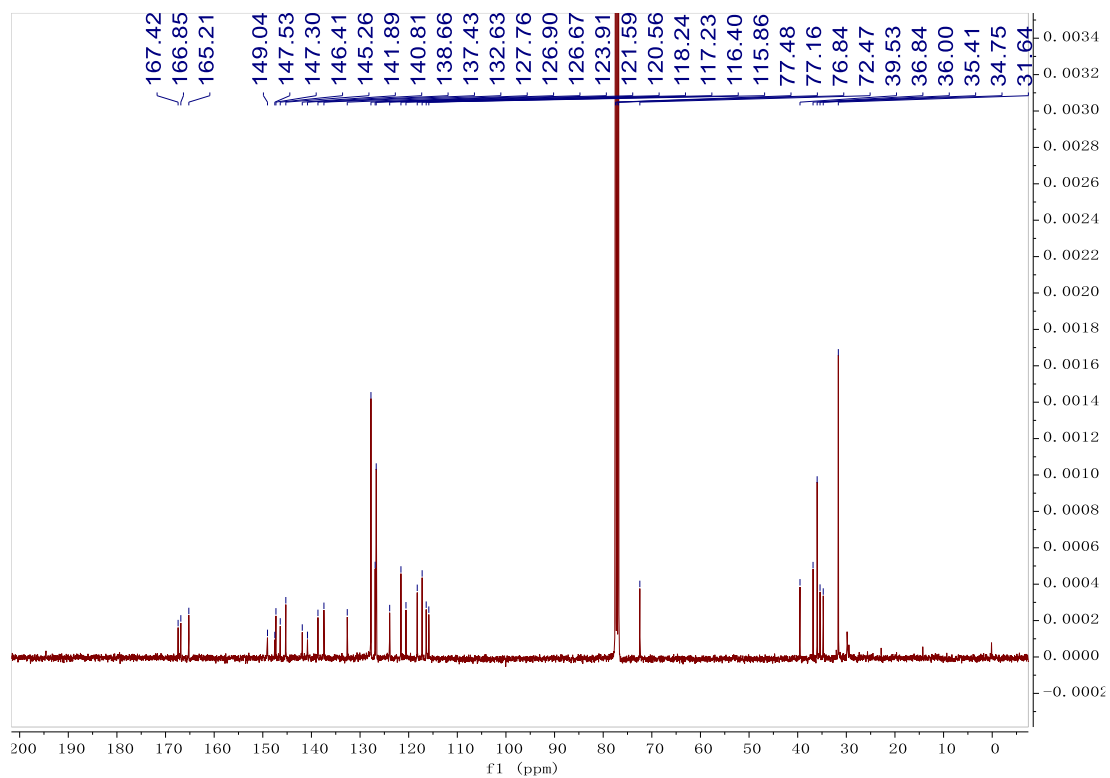

$^1\text{H}$  NMR spectrum of **5o** in  $\text{CDCl}_3$  at 298 K

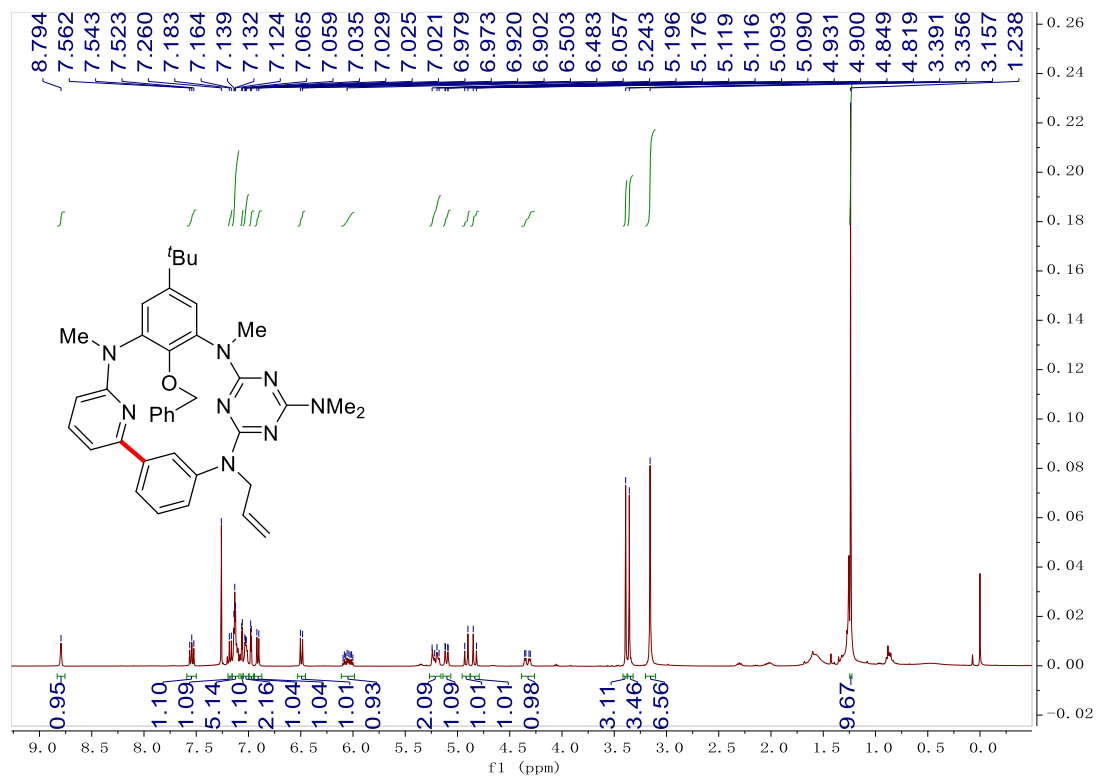

$^{13}\text{C}$  NMR spectrum of **5o** in  $\text{CDCl}_3$  at 298 K

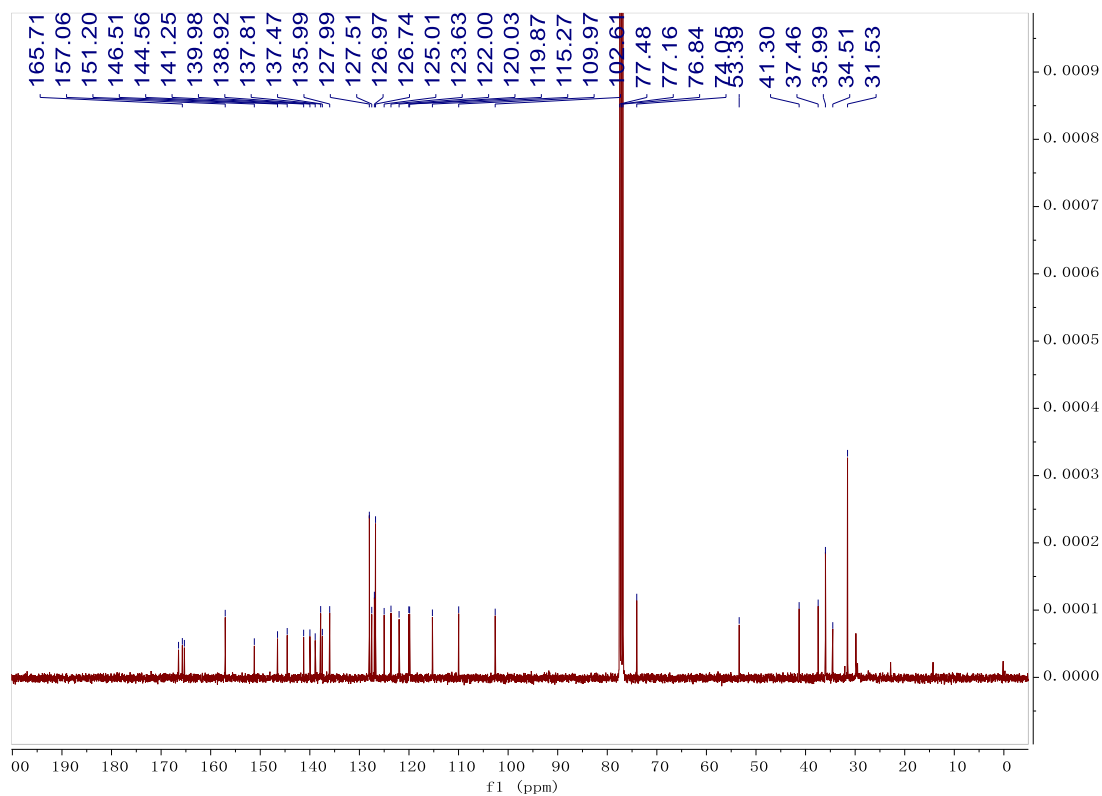

$^1\text{H}$  NMR spectrum of **5p** in  $\text{CDCl}_3$  at 298 K

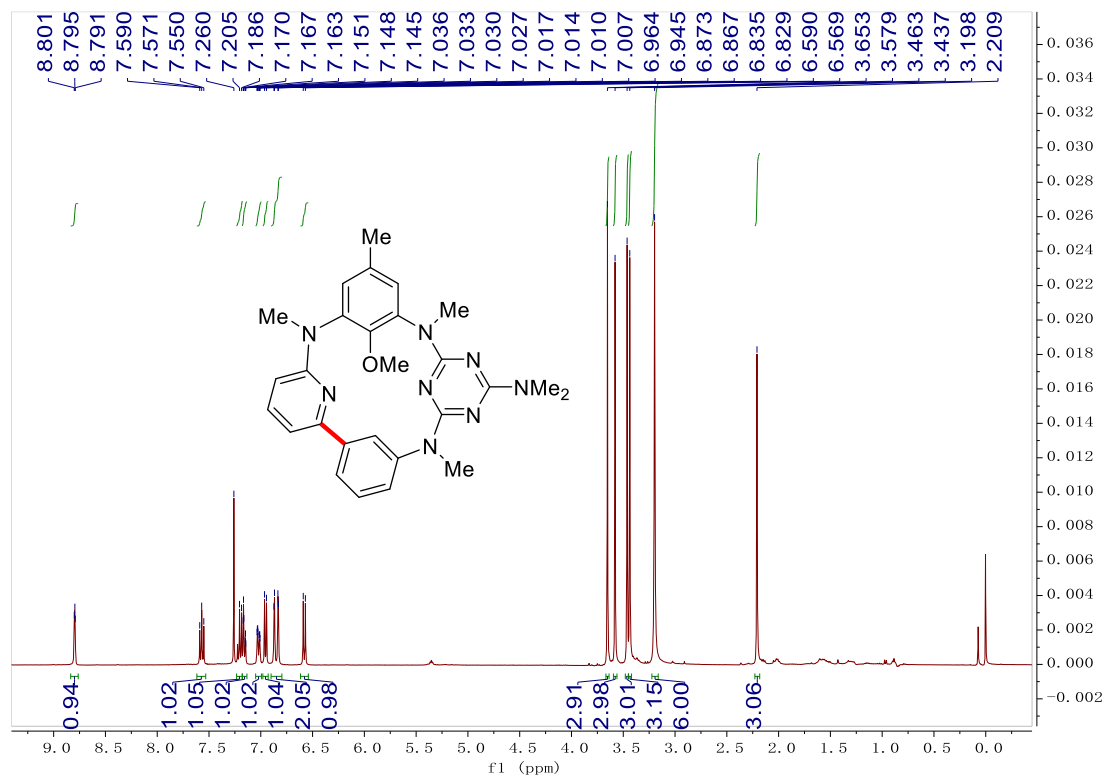

$^{13}\text{C}$  NMR spectrum of **5p** in  $\text{CDCl}_3$  at 298 K

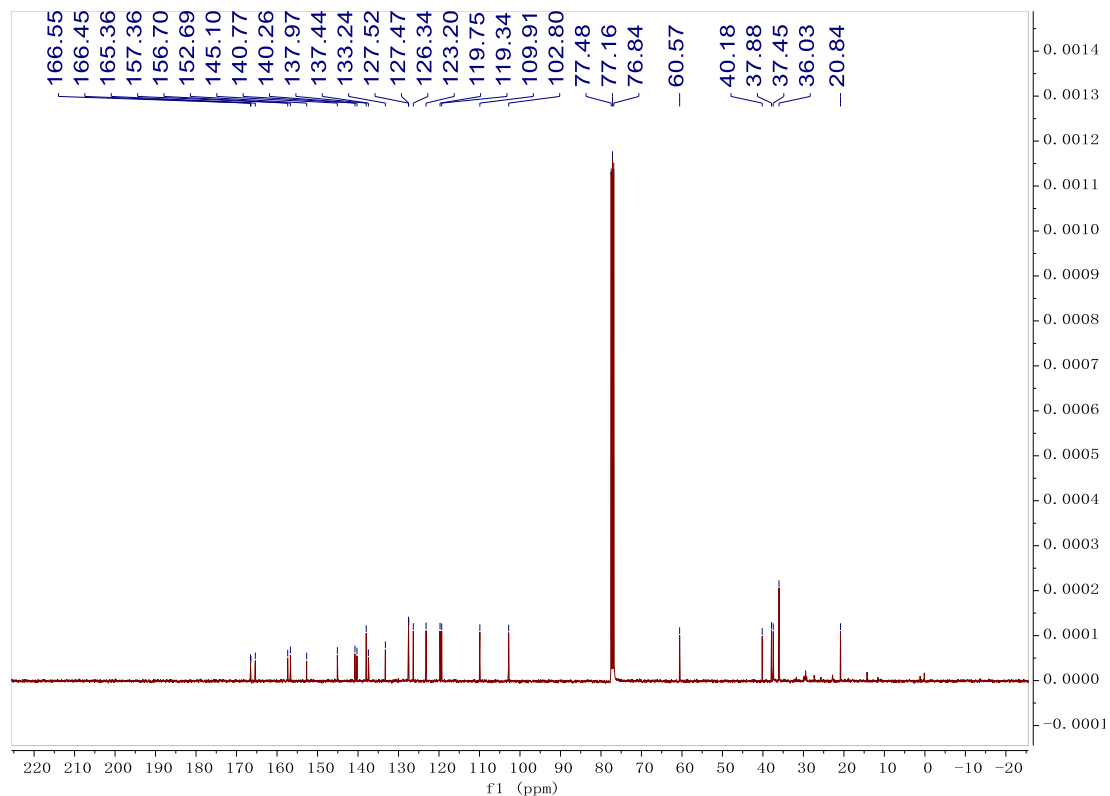



$^1\text{H}$  NMR spectrum of **5q** in  $\text{CDCl}_3$  at 298 K

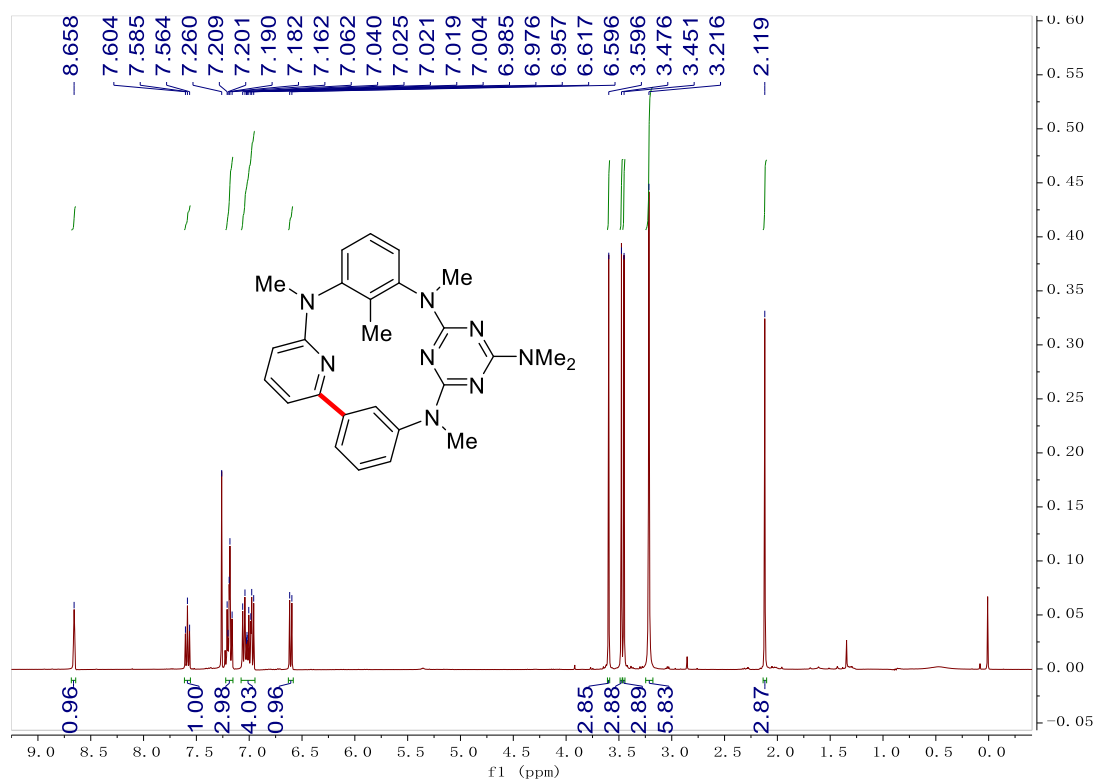

$^{13}\text{C}$  NMR spectrum of **5q** in  $\text{CDCl}_3$  at 298 K

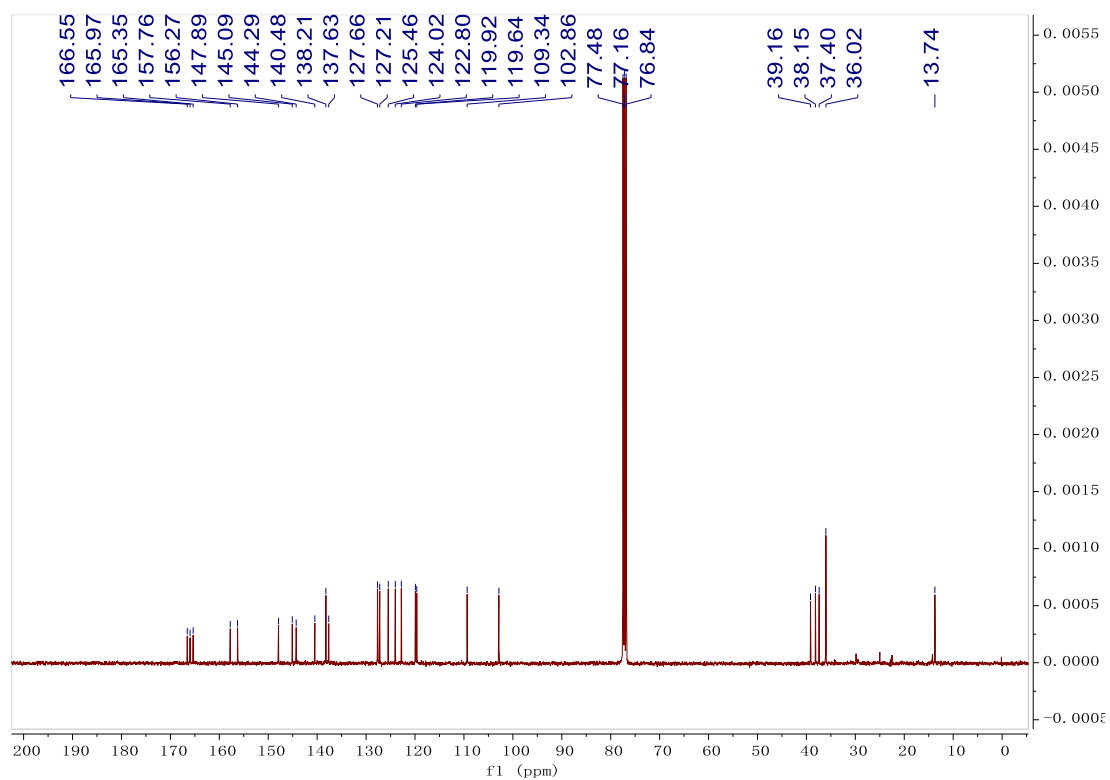

$^1\text{H}$  NMR spectrum of **5r** (dr = 20 : 1) in  $\text{CDCl}_3$  at 298 K

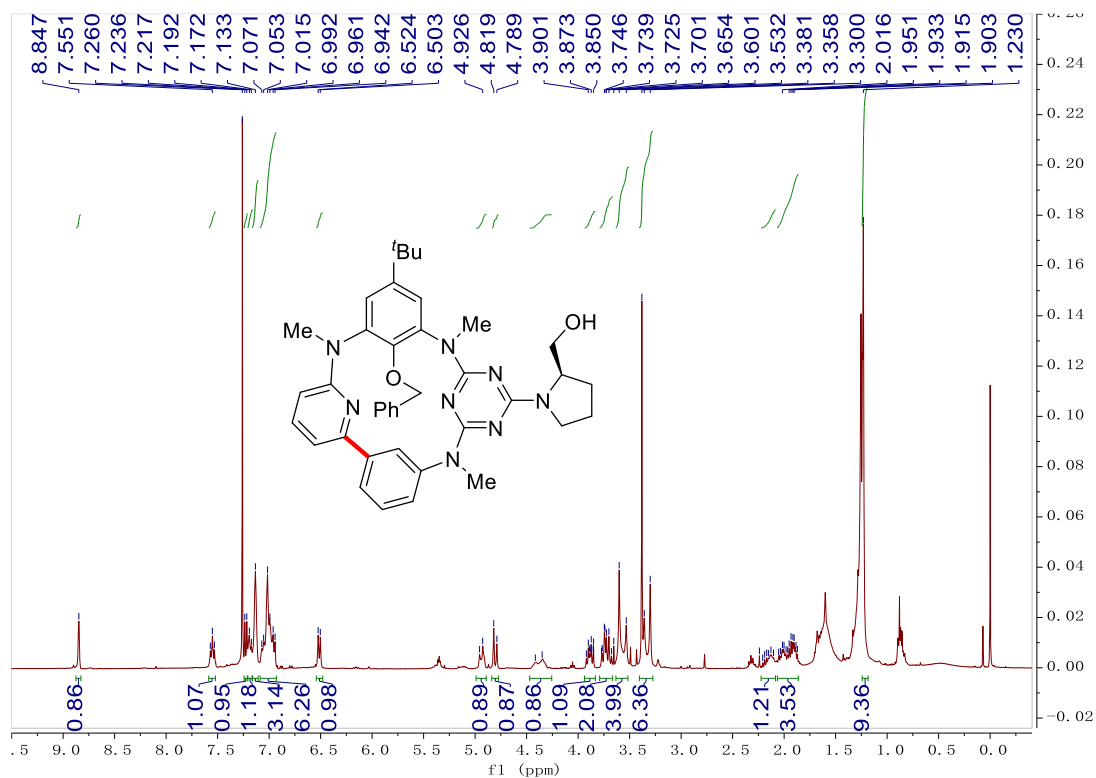

$^{13}\text{C}$  NMR spectrum of **5r** (dr = 20 : 1) in  $\text{DMSO}-d_6$  at 298 K

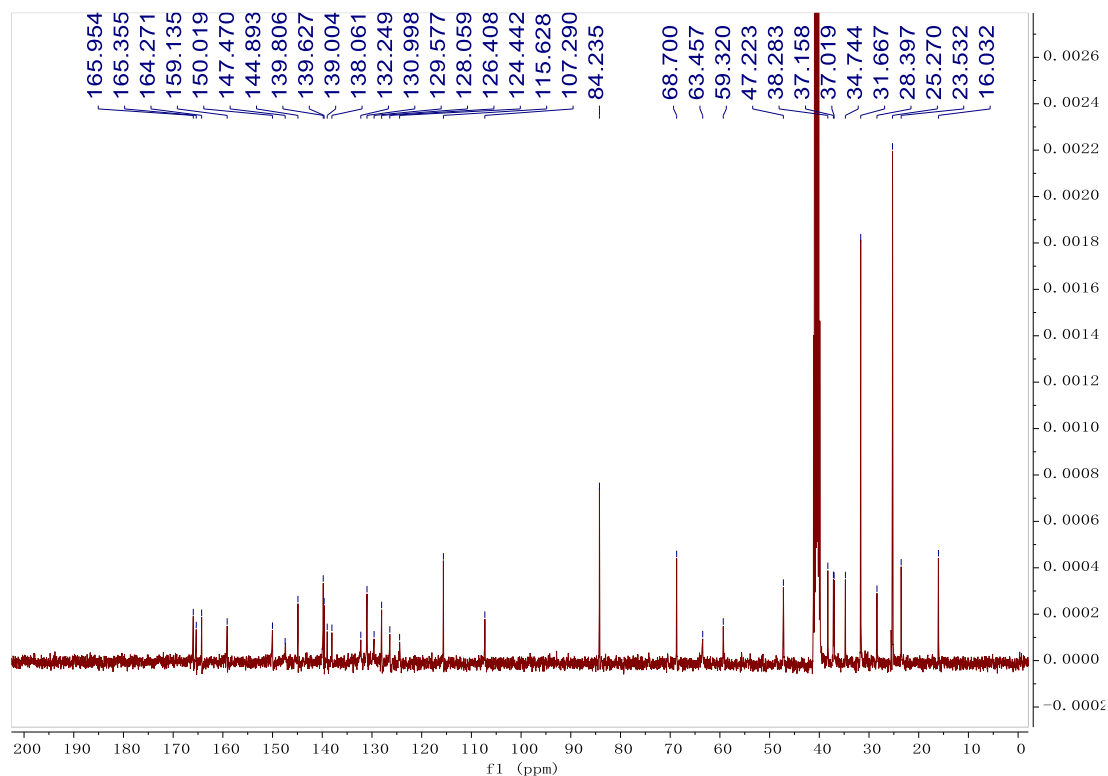

$^1\text{H}$  NMR spectrum of **5r** (dr = 1 : 20) in  $\text{CDCl}_3$  at 298 K

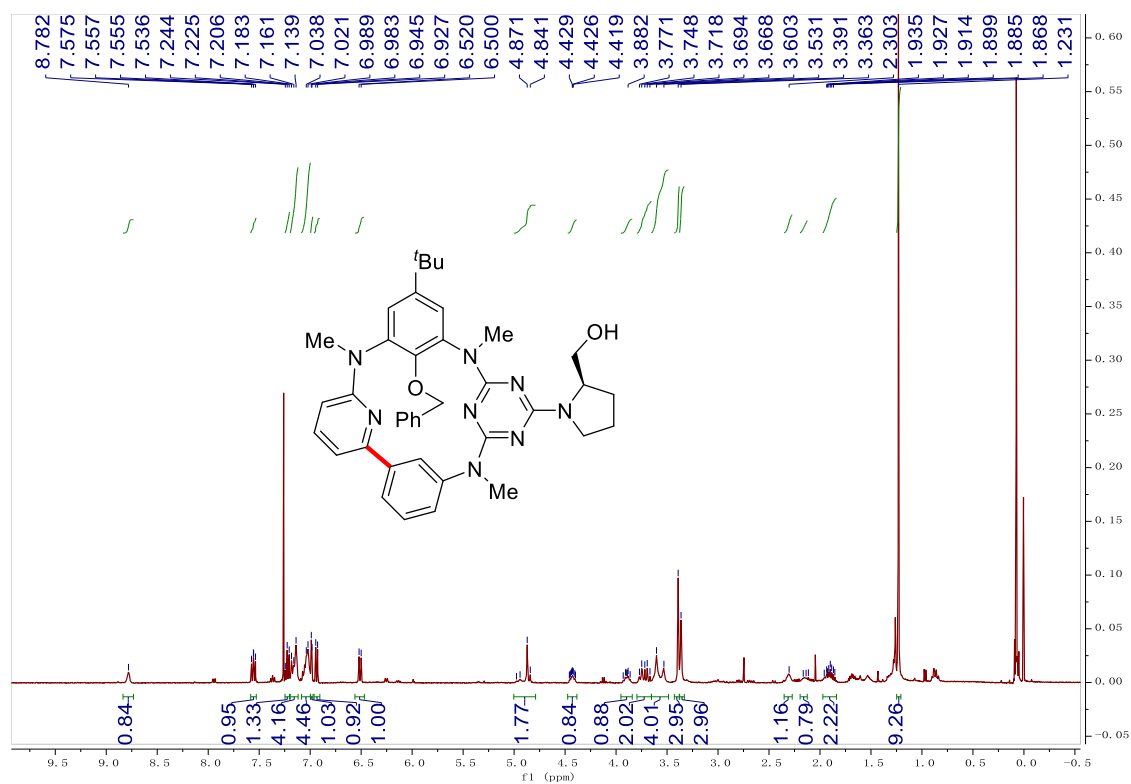

$^{13}\text{C}$  NMR spectrum of **5r** (dr = 1 : 20) in  $\text{CDCl}_3$  at 298 K

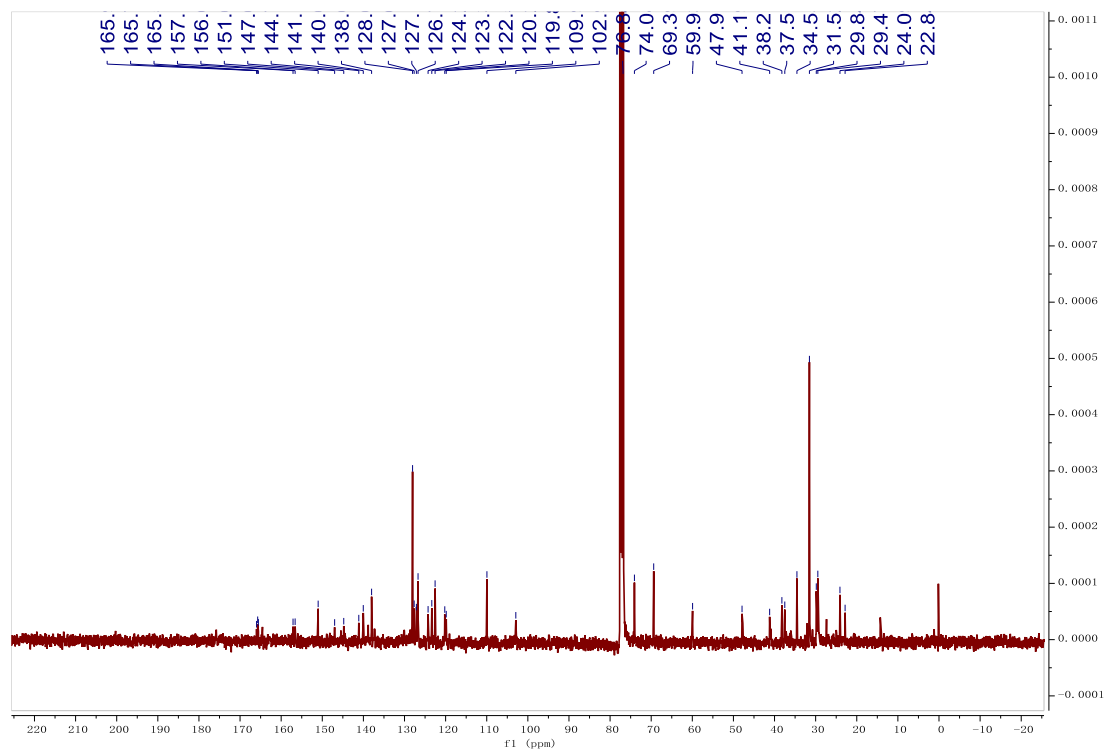

$^1\text{H}$  NMR spectrum of **5s** in  $\text{CDCl}_3$  at 298 K

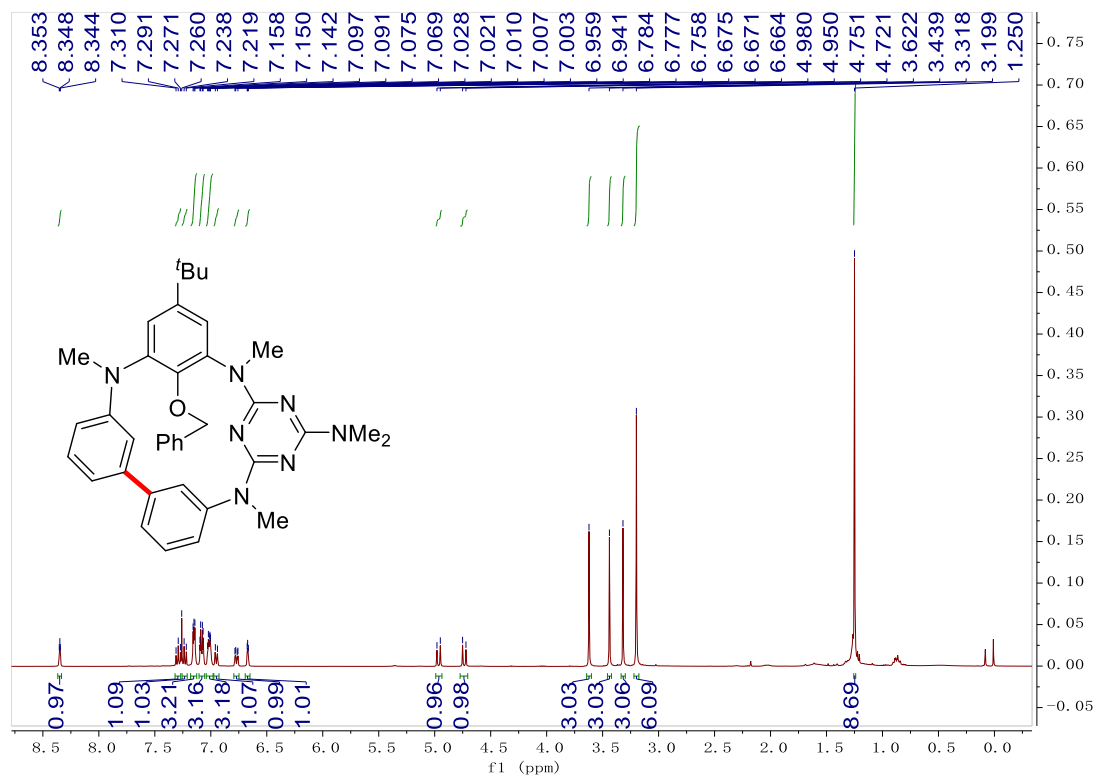

$^{13}\text{C}$  NMR spectrum of **5s** in  $\text{CDCl}_3$  at 298 K

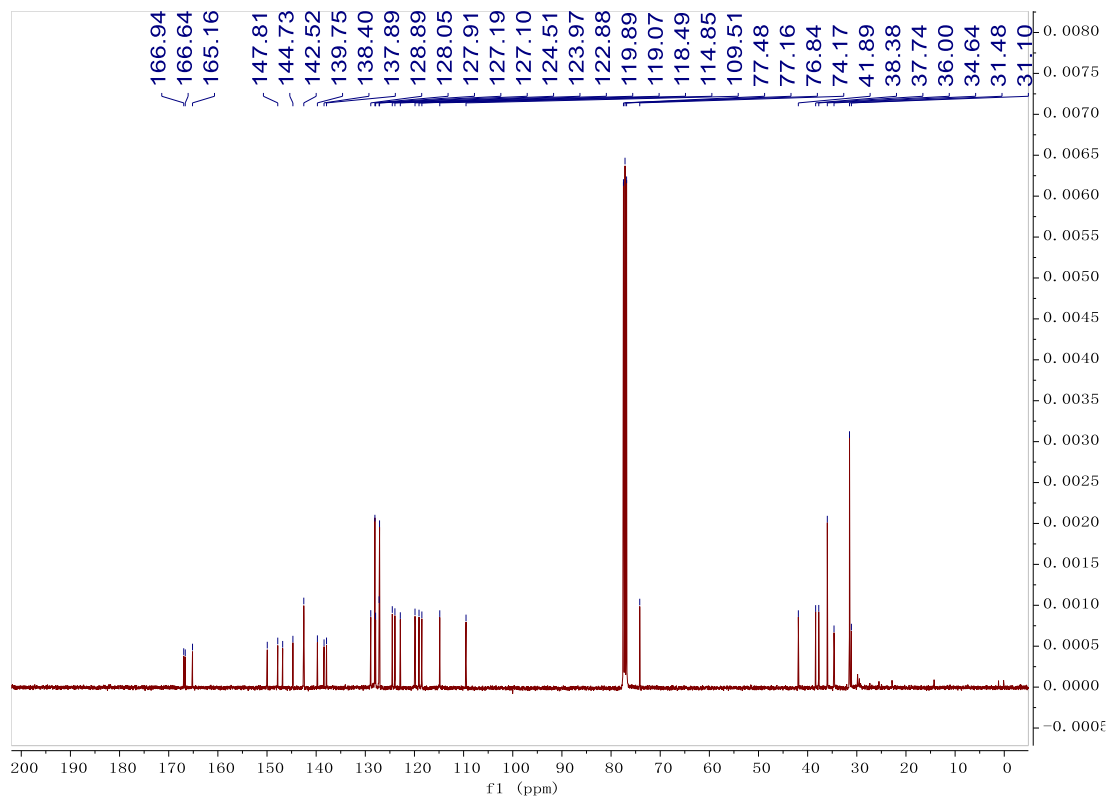

$^1\text{H}$  NMR spectrum of **5t** in  $\text{CDCl}_3$  at 298 K

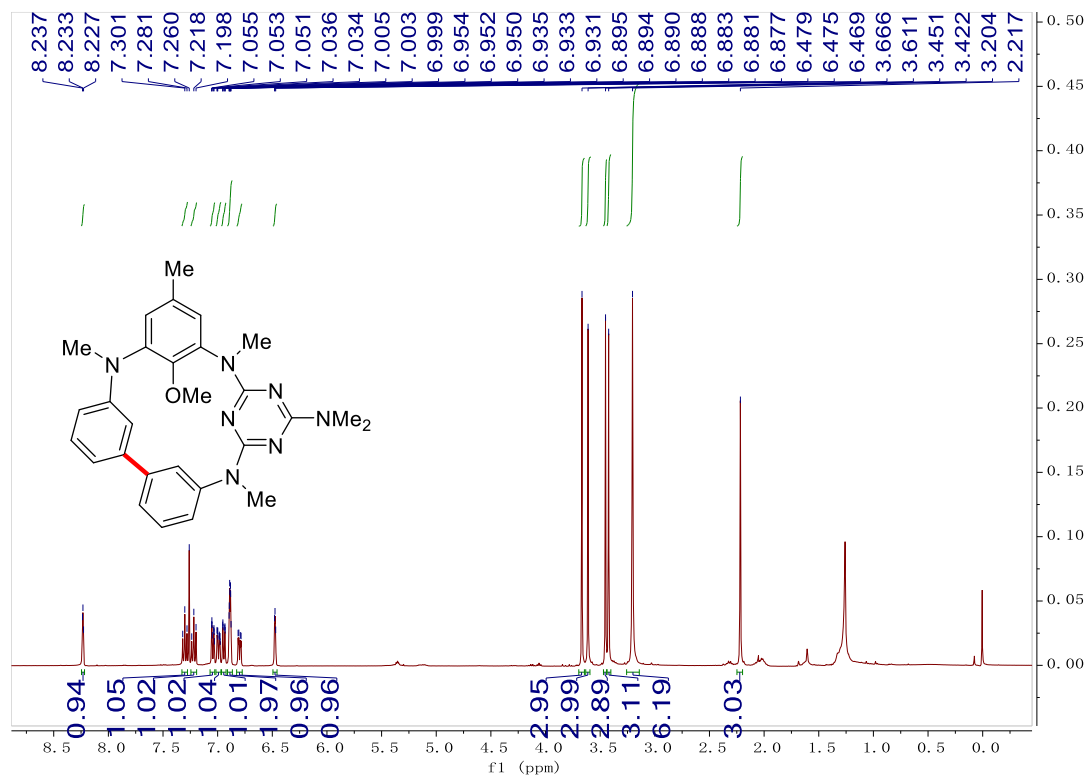

$^{13}\text{C}$  NMR spectrum of **5t** in  $\text{CDCl}_3$  at 298 K

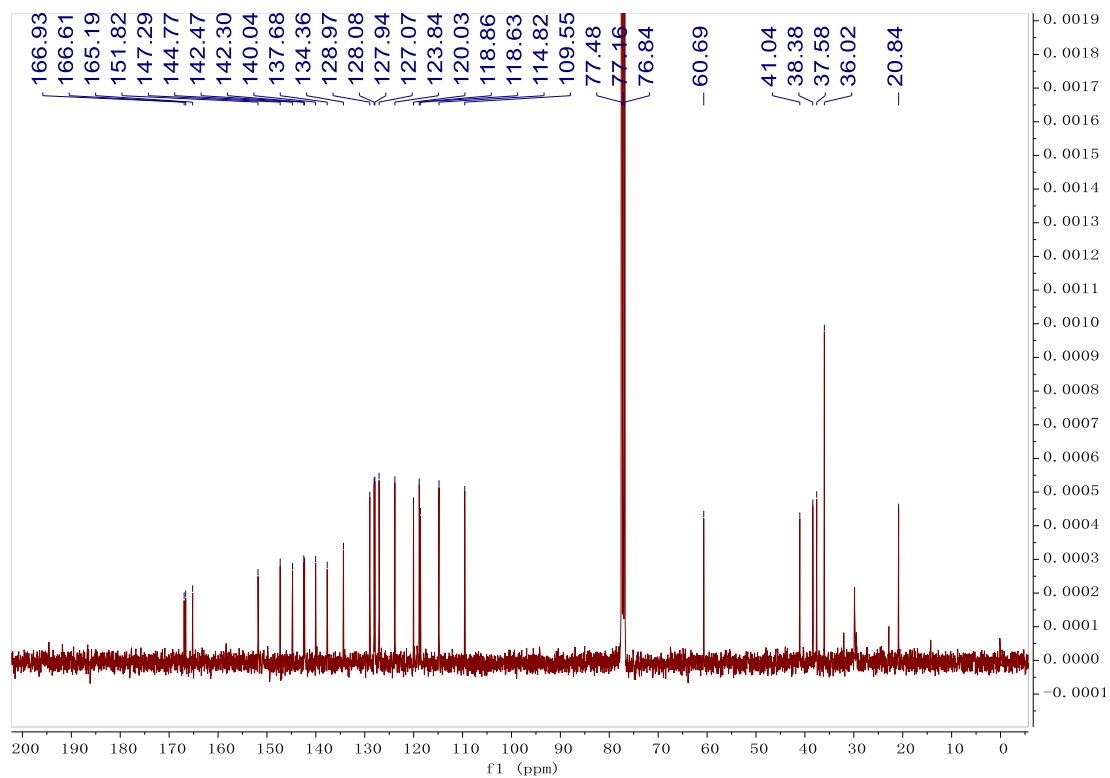

$^1\text{H}$  NMR spectrum of **5u** in  $\text{CDCl}_3$  at 298 K

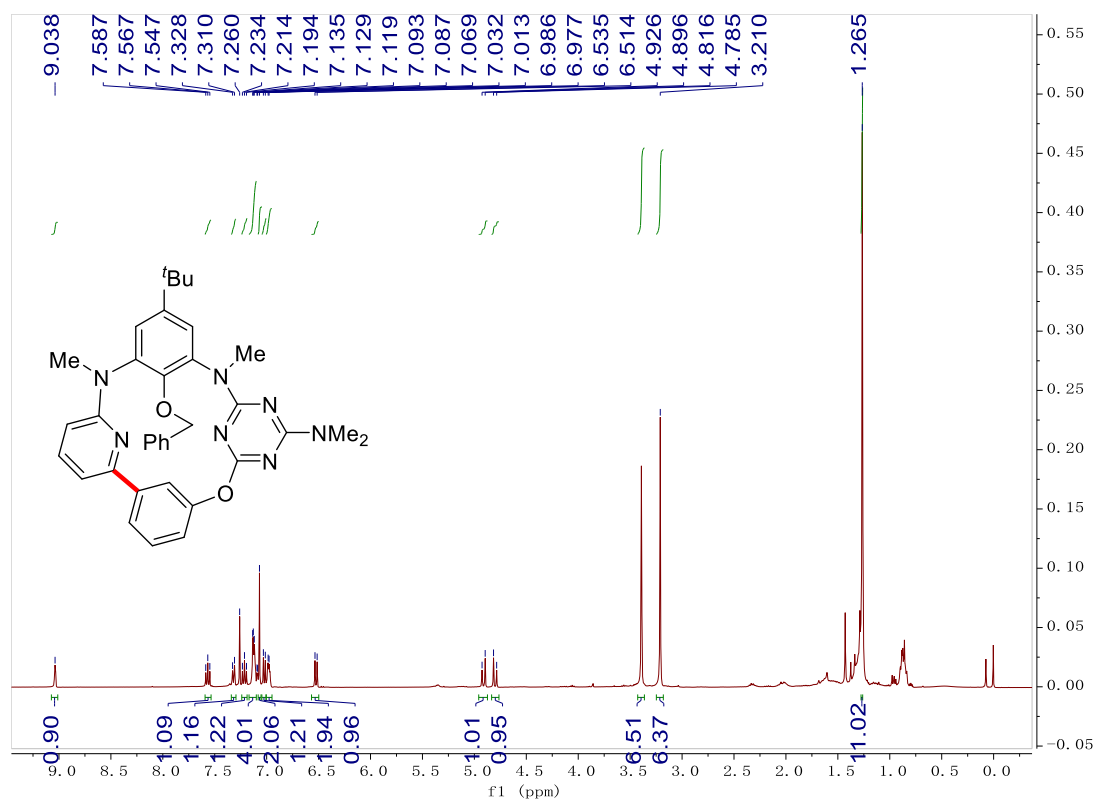

$^{13}\text{C}$  NMR spectrum of **5u** in  $\text{CDCl}_3$  at 298 K

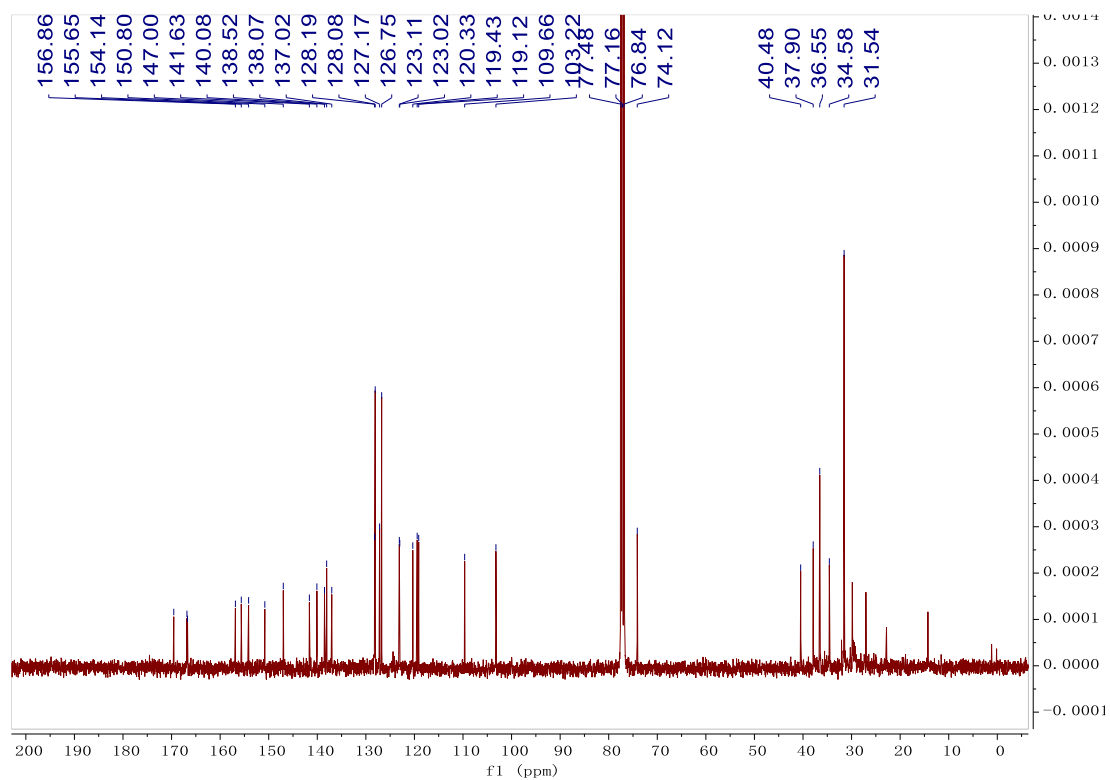

$^1\text{H}$  NMR spectrum of **5v** in  $\text{CDCl}_3$  at 298 K

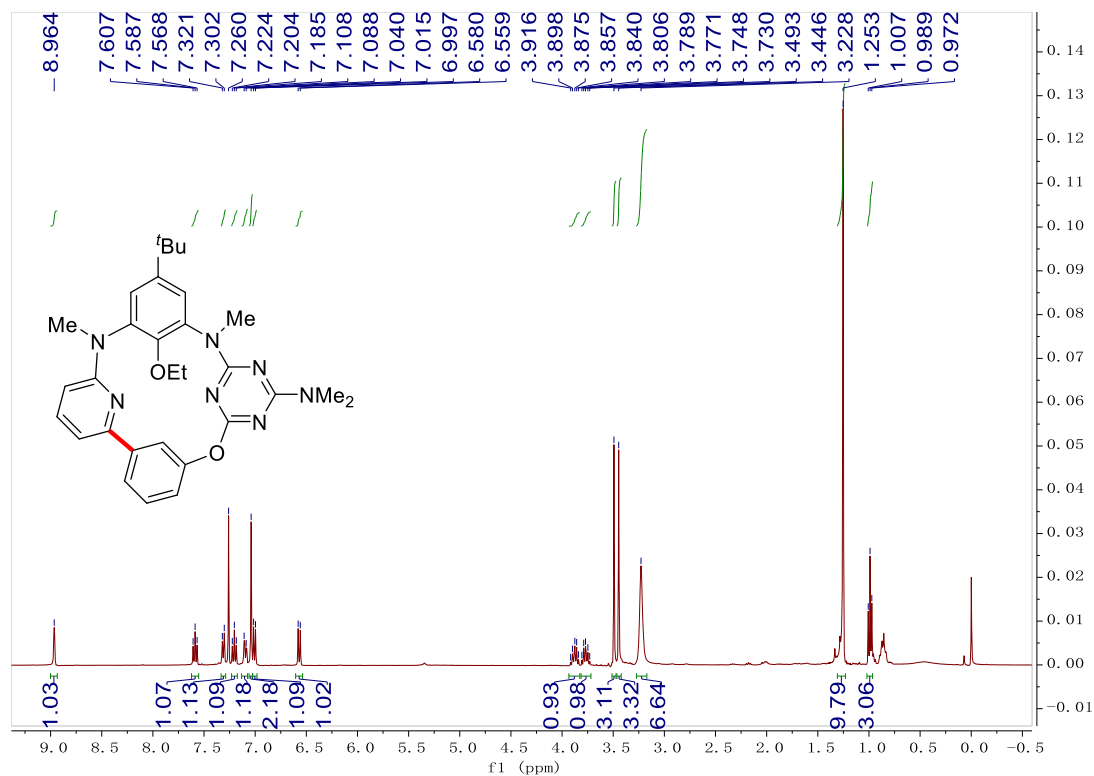

$^{13}\text{C}$  NMR spectrum of **5v** in  $\text{CDCl}_3$  at 298 K

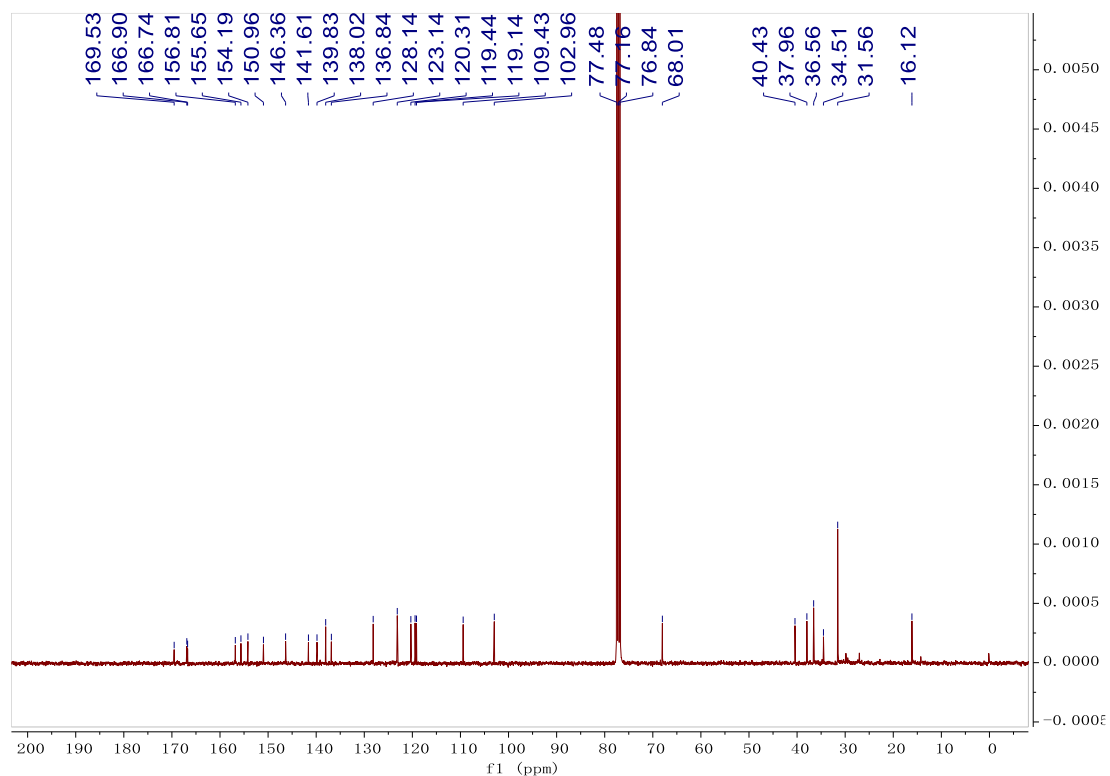

$^1\text{H}$  NMR spectrum of **5w** in  $\text{CDCl}_3$  at 298 K

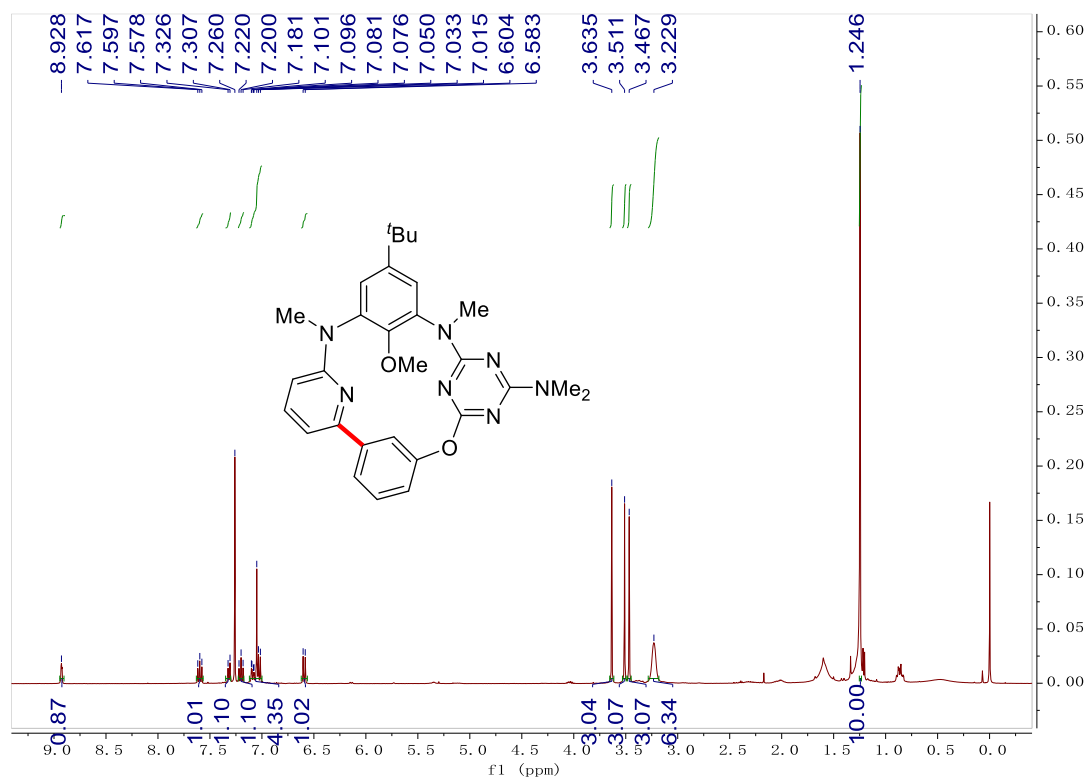

$^{13}\text{C}$  NMR spectrum of **5w** in  $\text{CDCl}_3$  at 298 K

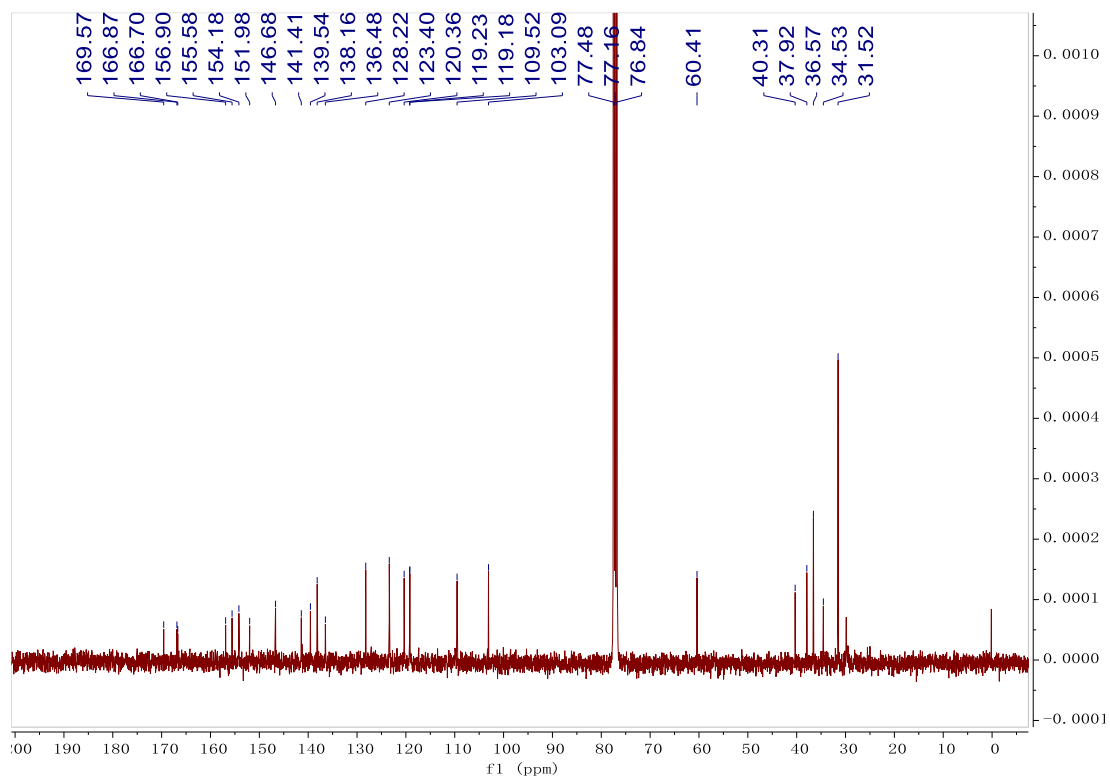



$^1\text{H}$  NMR spectrum of **5x** in  $\text{CDCl}_3$  at 298 K

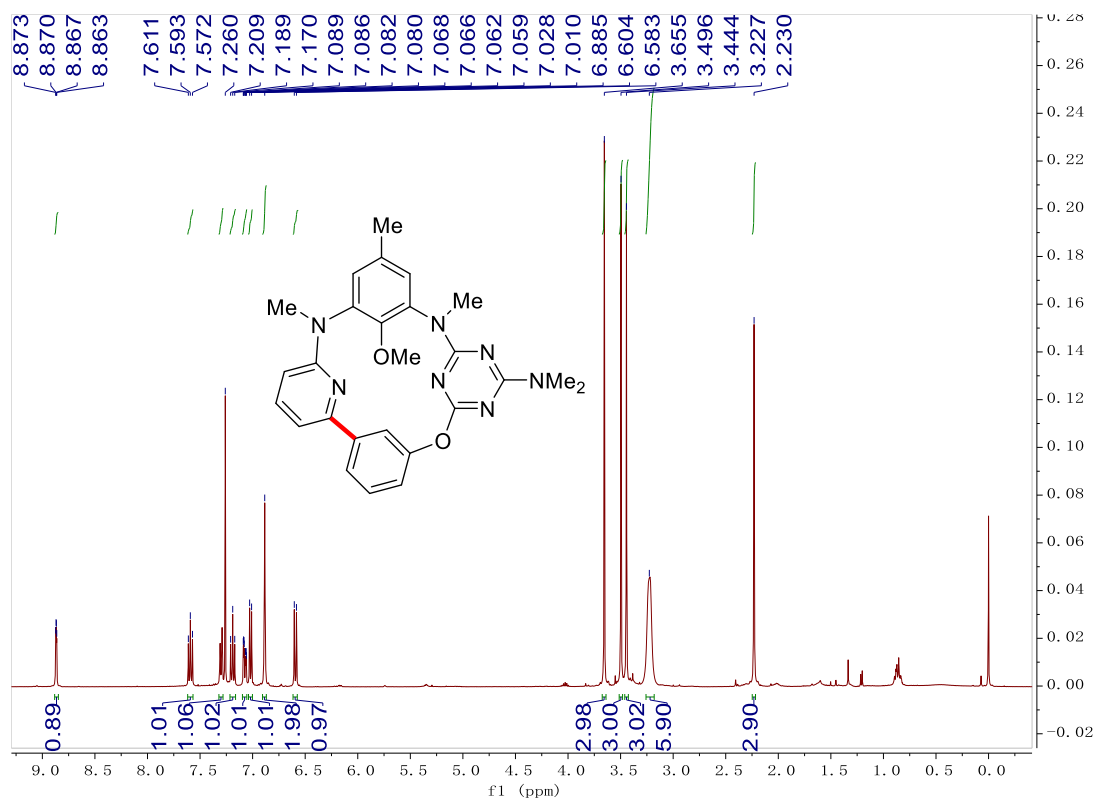

$^{13}\text{C}$  NMR spectrum of **5x** in  $\text{CDCl}_3$  at 298 K

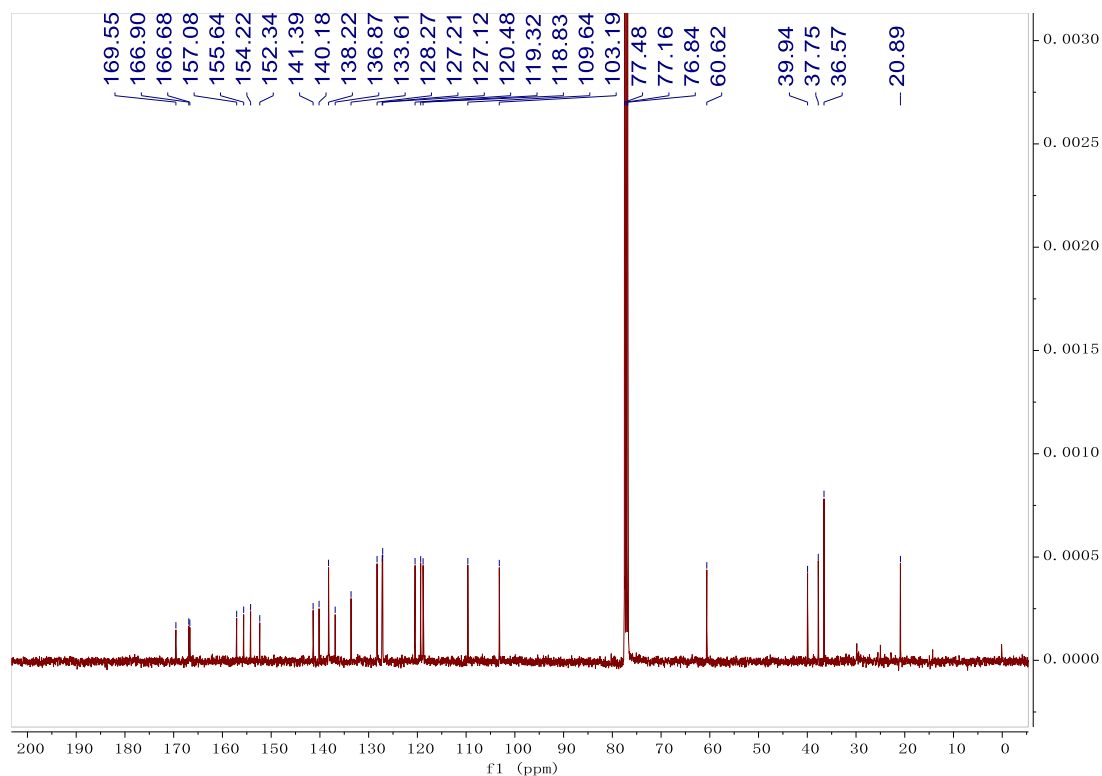

$^1\text{H}$  NMR spectrum of **5y** in  $\text{CDCl}_3$  at 298 K

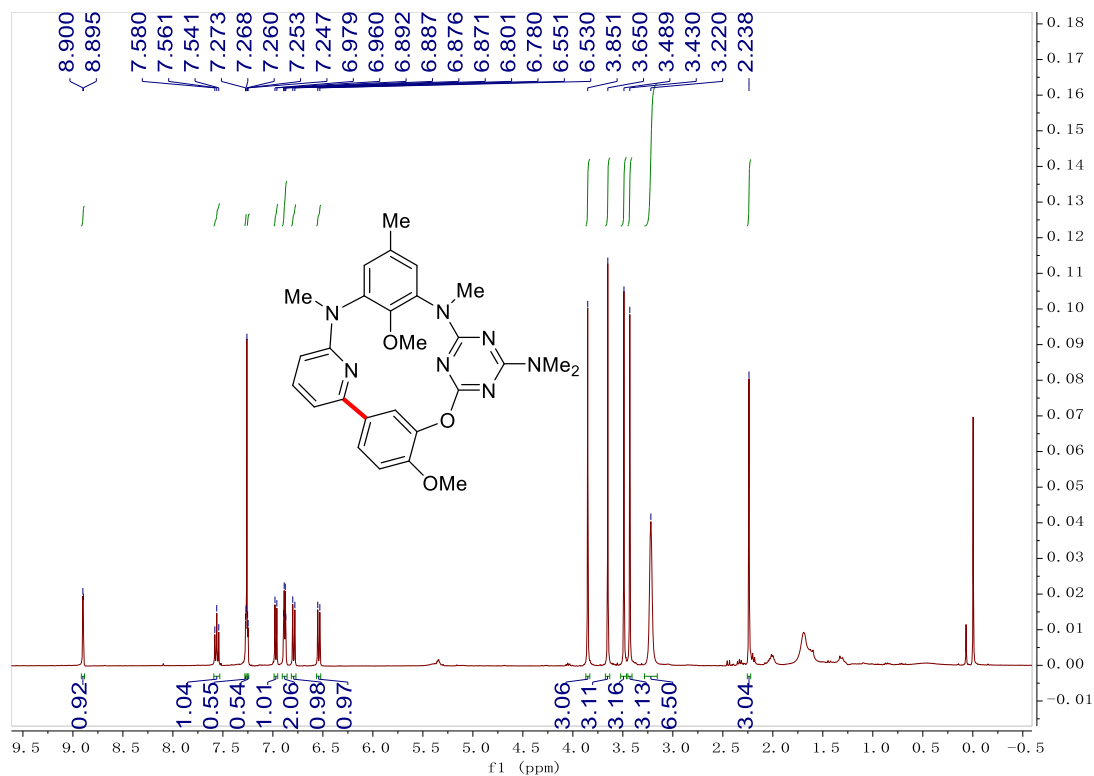

$^{13}\text{C}$  NMR spectrum of **5y** in  $\text{CDCl}_3$  at 298 K

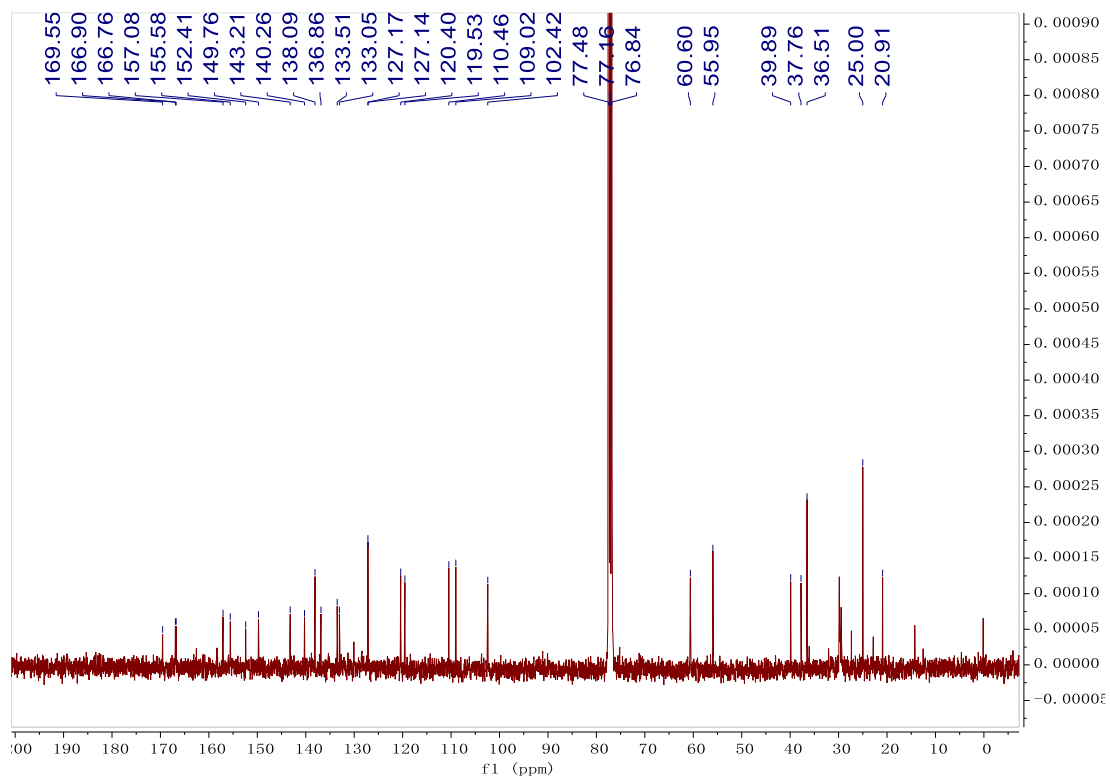

$^1\text{H}$  NMR spectrum of **5z** in  $\text{CDCl}_3$  at 298 K

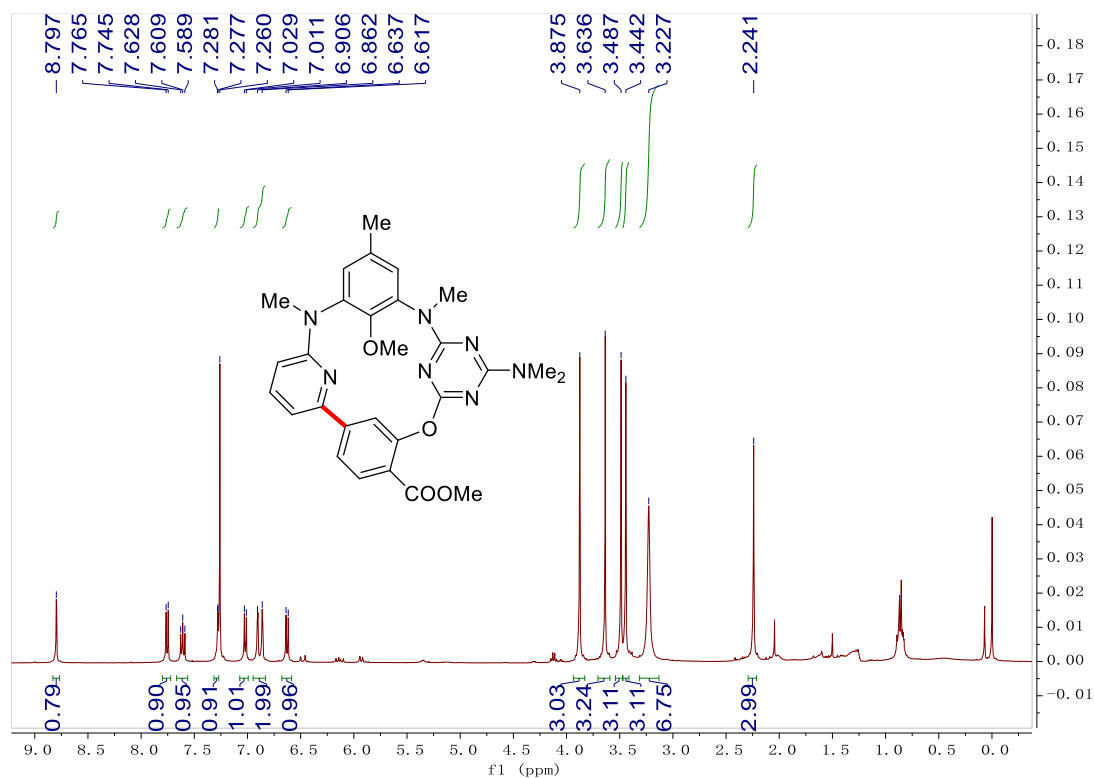

$^{13}\text{C}$  NMR spectrum of **5z** in  $\text{CDCl}_3$  at 298 K

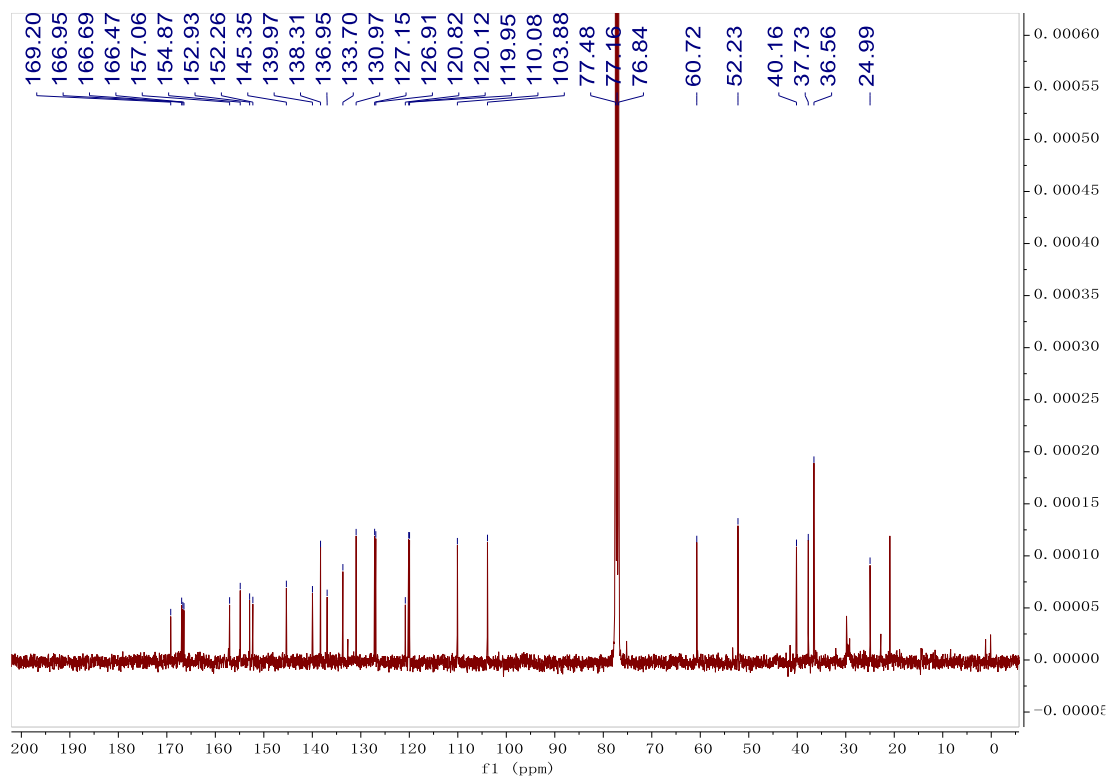

$^1\text{H}$  NMR spectrum of **5aa** in  $\text{CDCl}_3$  at 298 K

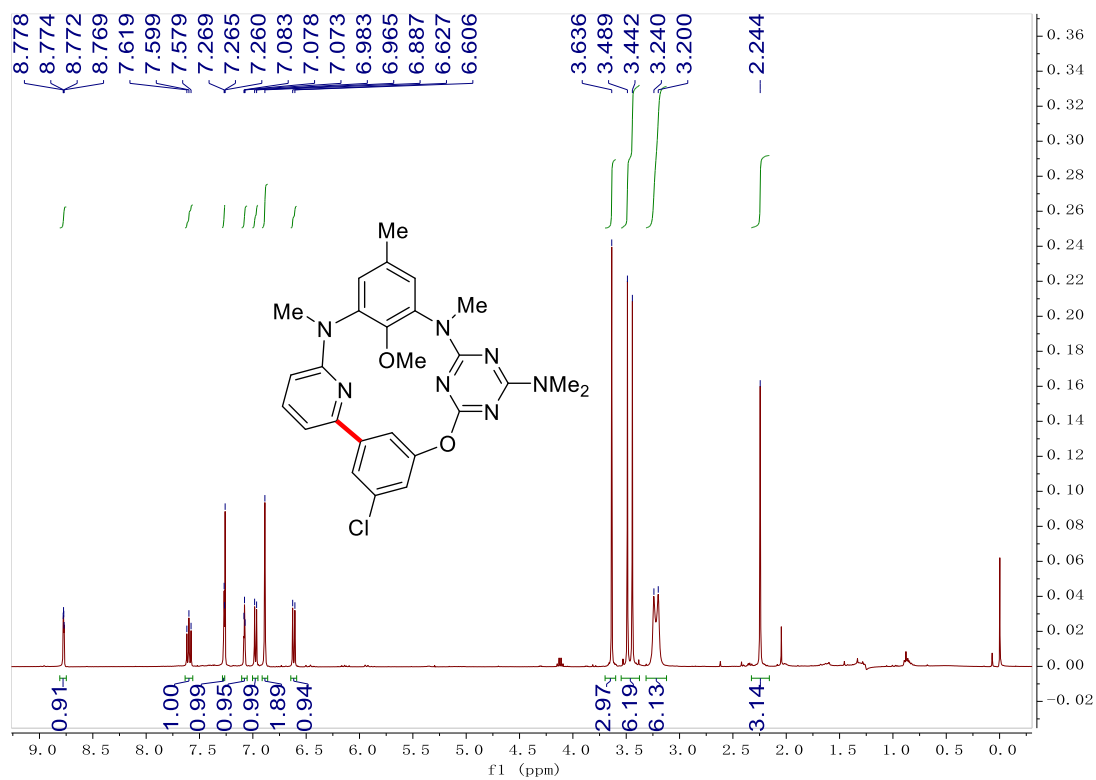

$^{13}\text{C}$  NMR spectrum of **5aa** in  $\text{CDCl}_3$  at 298 K

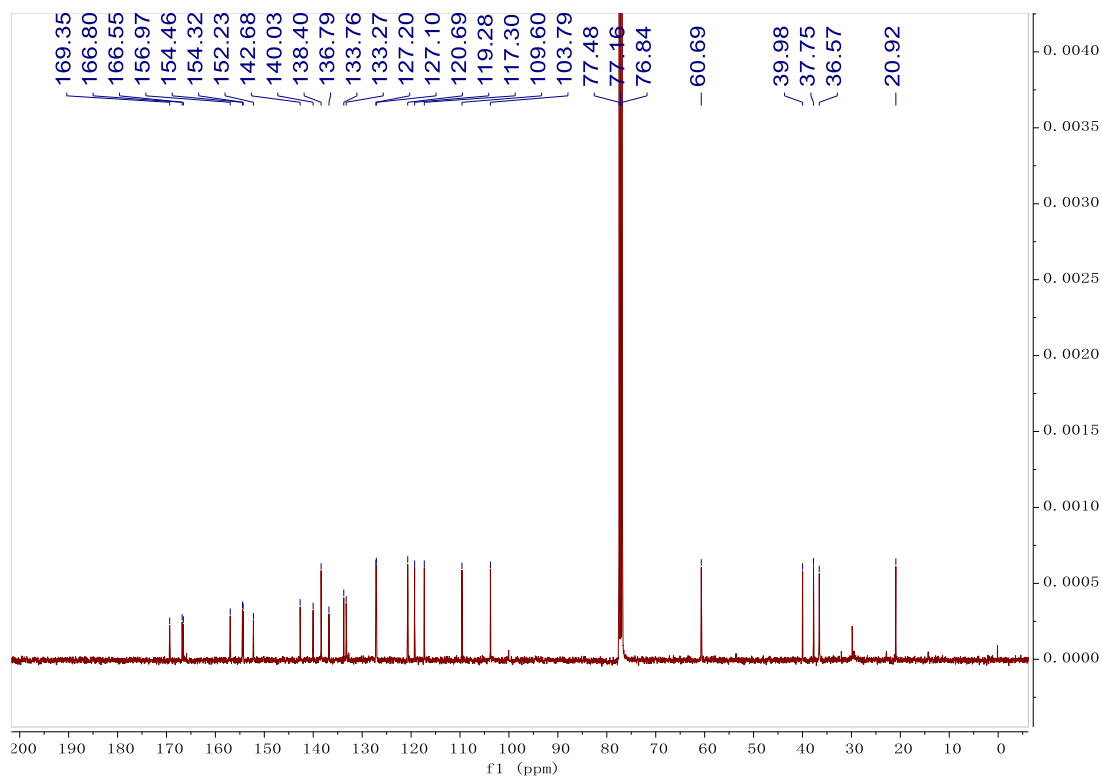

$^1\text{H}$  NMR spectrum of **5ab** in  $\text{CDCl}_3$  at 298 K

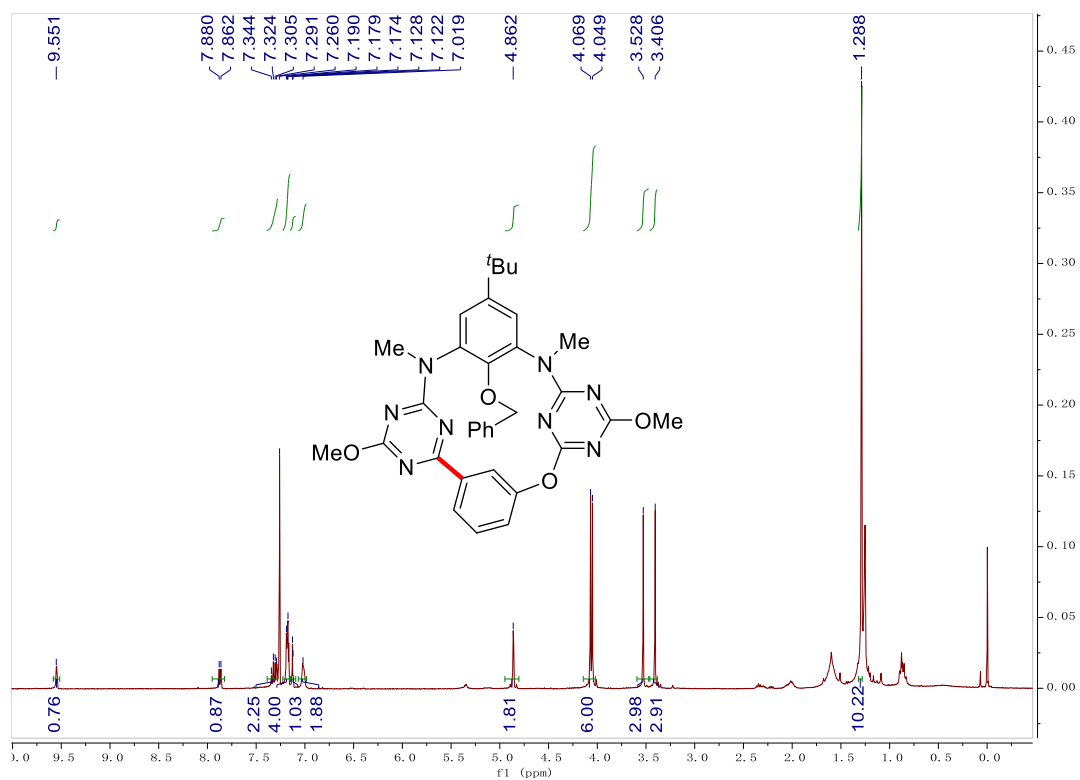

$^{13}\text{C}$  NMR spectrum of **5ab** in  $\text{CDCl}_3$  at 298 K

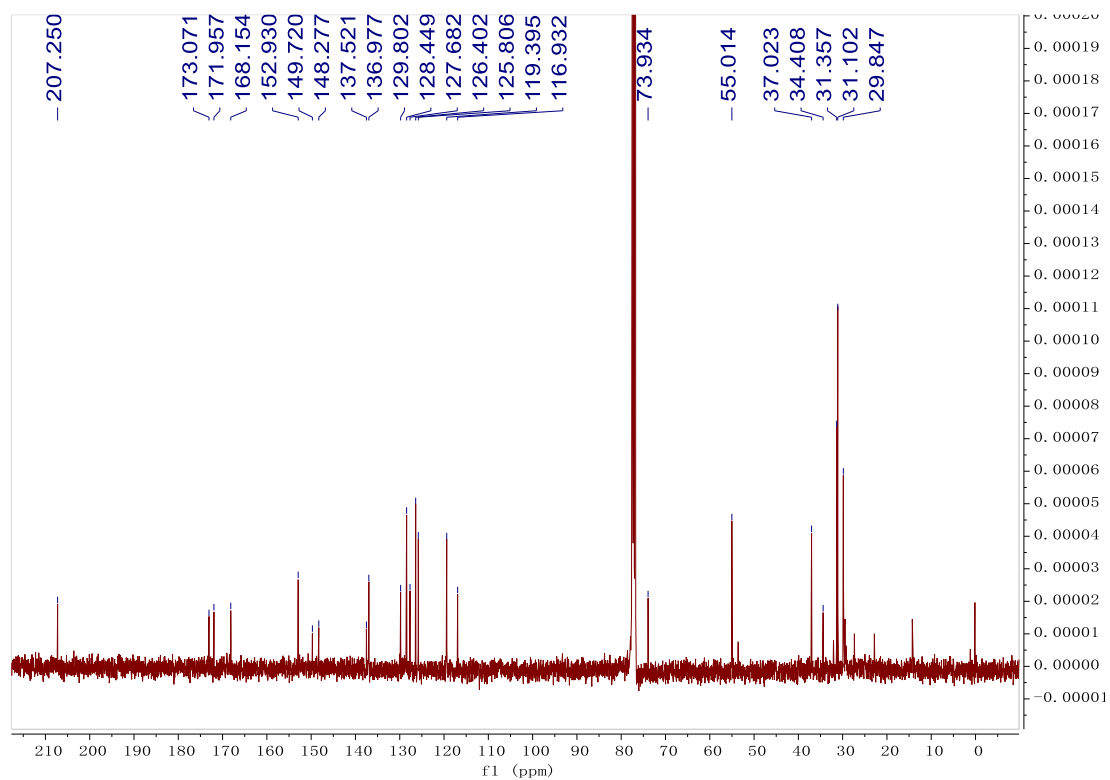

$^1\text{H}$  NMR spectrum of **5ac** in  $\text{CDCl}_3$  at 298 K

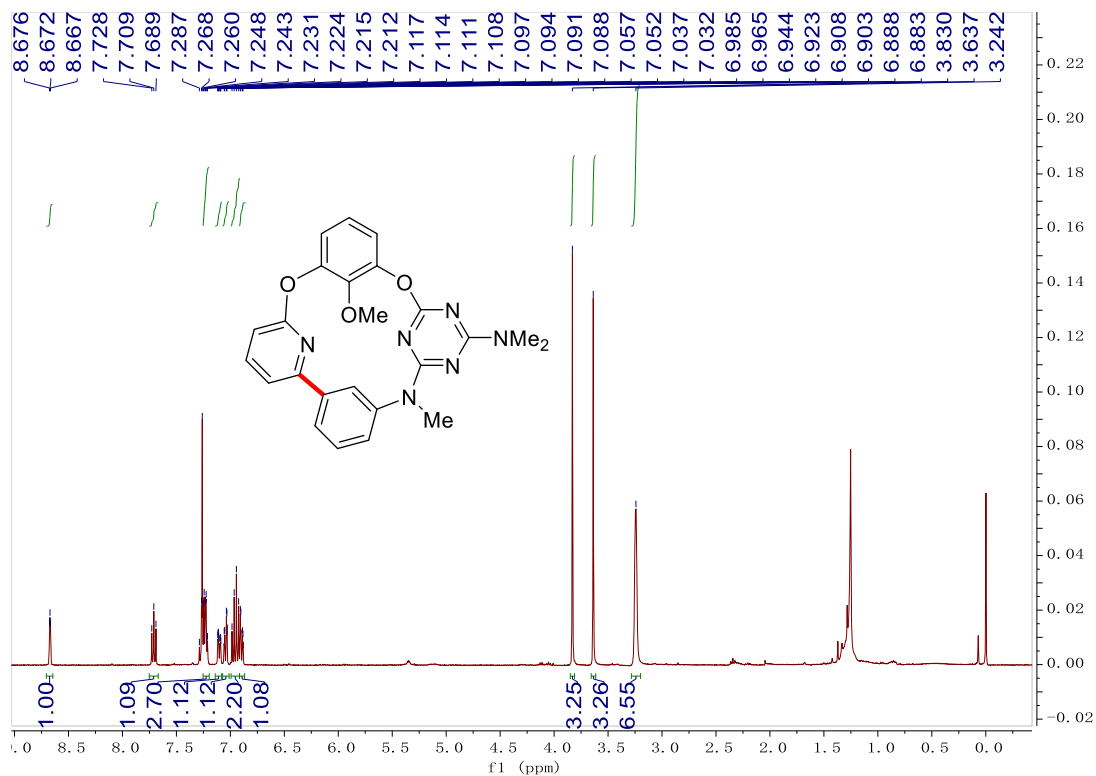

$^{13}\text{C}$  NMR spectrum of **5ac** in  $\text{CDCl}_3$  at 298 K

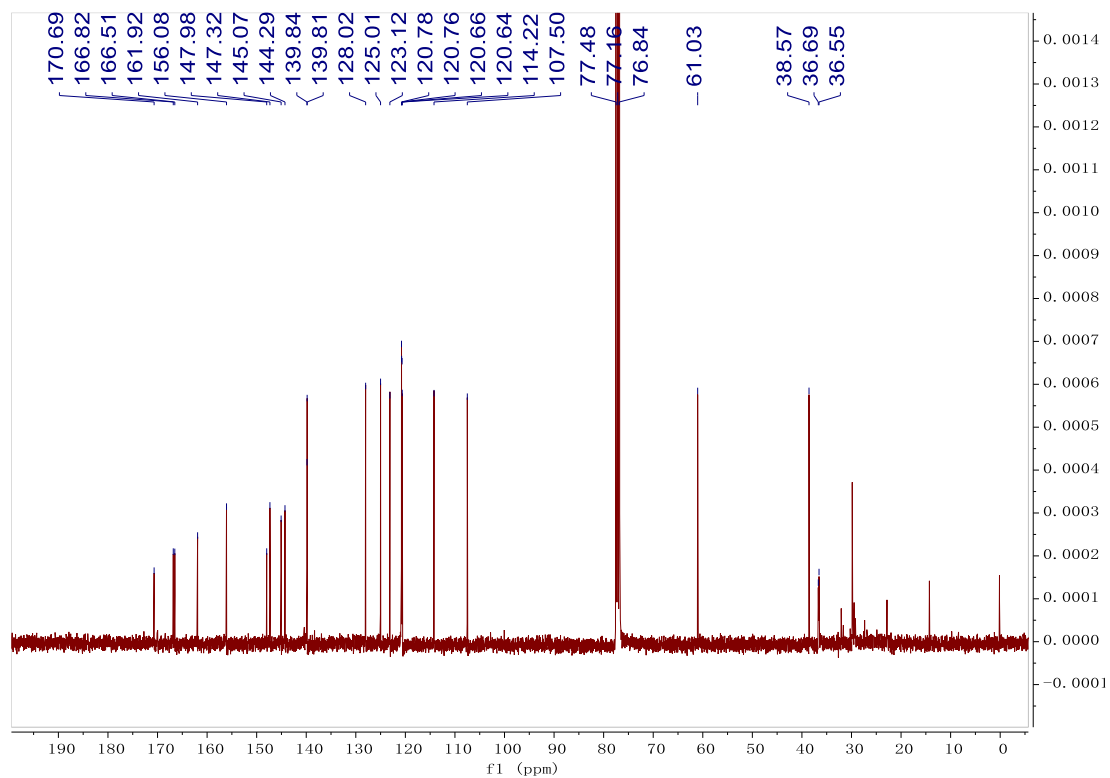

<sup>1</sup>H NMR spectrum of **5ad** in CDCl<sub>3</sub> at 298 K

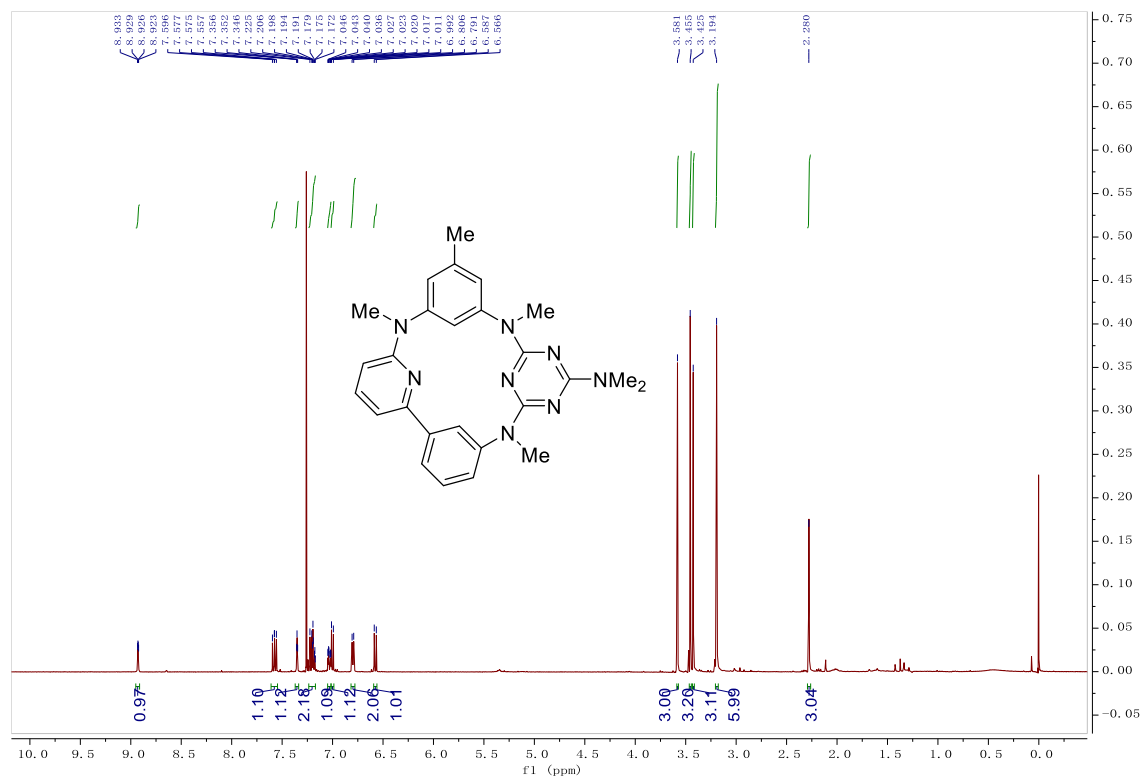

<sup>13</sup>C NMR spectrum of **5ad** in CDCl<sub>3</sub> at 298 K

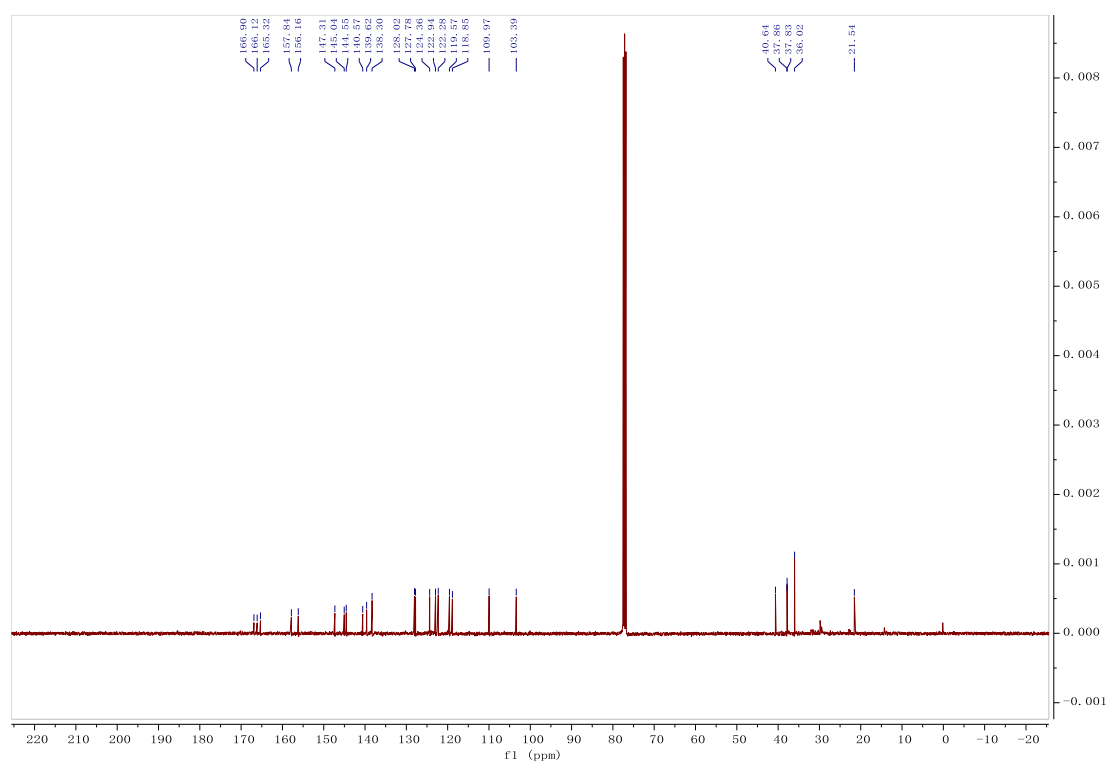

$^1\text{H}$  NMR spectrum of **5ae** in  $\text{CDCl}_3$  at 298 K

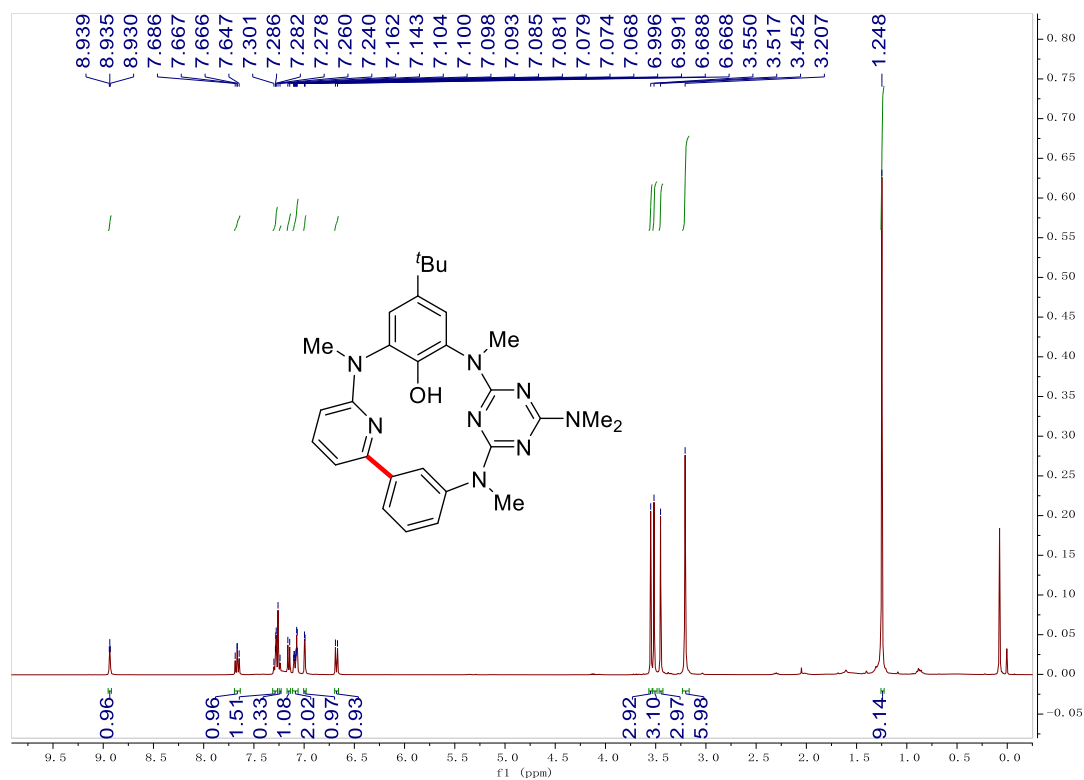

$^{13}\text{C}$  NMR spectrum of **5ae** in  $\text{CDCl}_3$  at 298 K

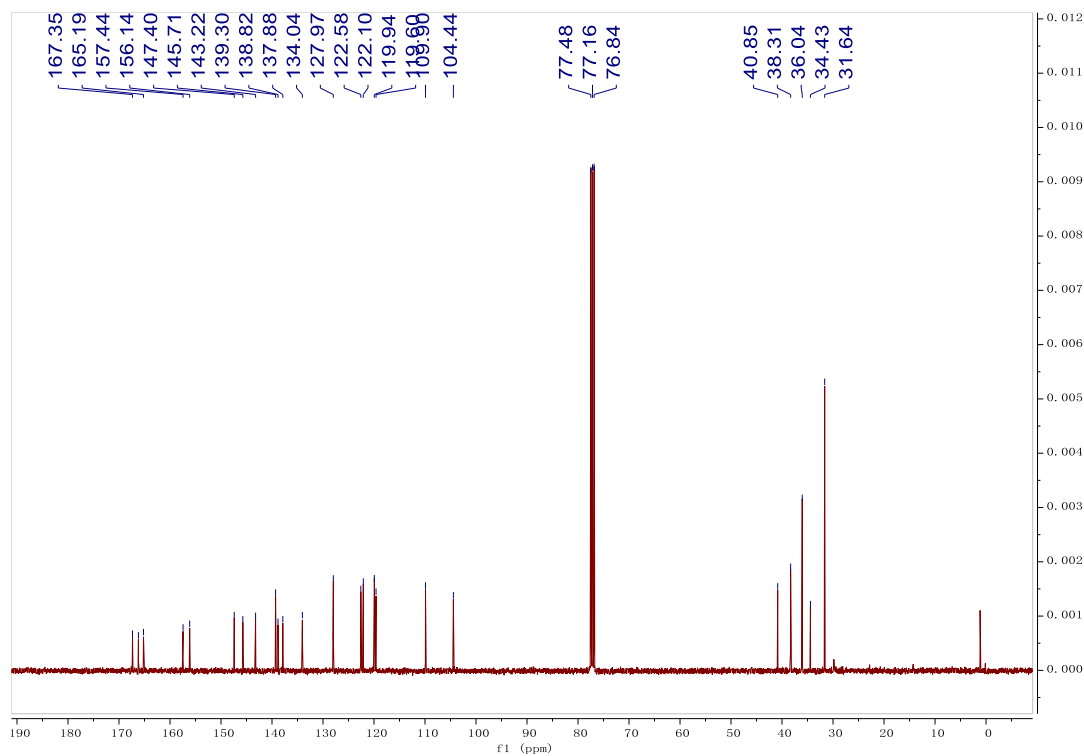



## 16. Copies of HPLC chromatograms

5a

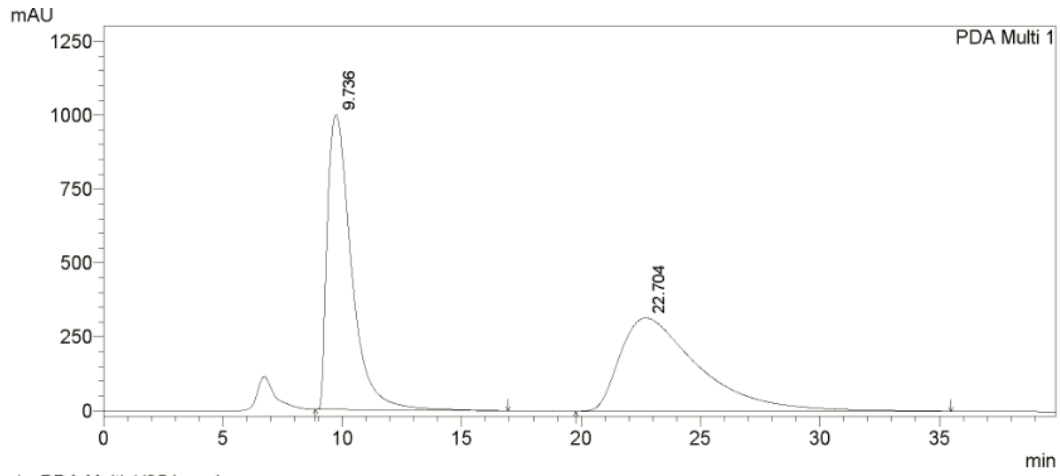

PeakTable

PDA Ch1 254nm 4nm

| Peak# | Ret. Time | Area      | Height  | Area %  | Height % |
|-------|-----------|-----------|---------|---------|----------|
| 1     | 9.736     | 69979159  | 997564  | 49.129  | 75.951   |
| 2     | 22.704    | 72461477  | 315868  | 50.871  | 24.049   |
| Total |           | 142440636 | 1313432 | 100.000 | 100.000  |

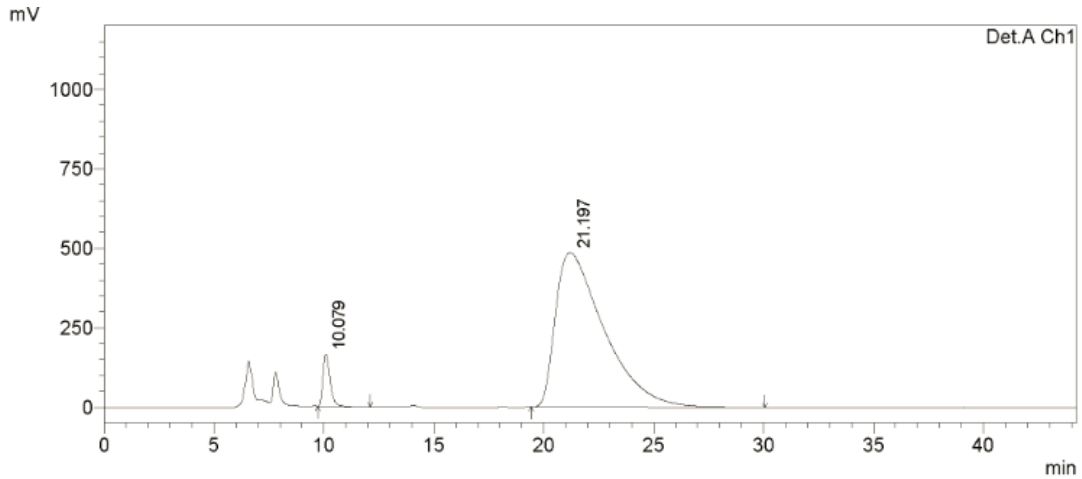

PeakTable

检测器 A Ch1 254nm

| Peak# | Ret. Time | Area     | Height | Area %  | Height % |
|-------|-----------|----------|--------|---------|----------|
| 1     | 10.079    | 3693747  | 164070 | 4.710   | 25.252   |
| 2     | 21.197    | 74730408 | 485652 | 95.290  | 74.748   |
| Total |           | 78424155 | 649722 | 100.000 | 100.000  |

5b

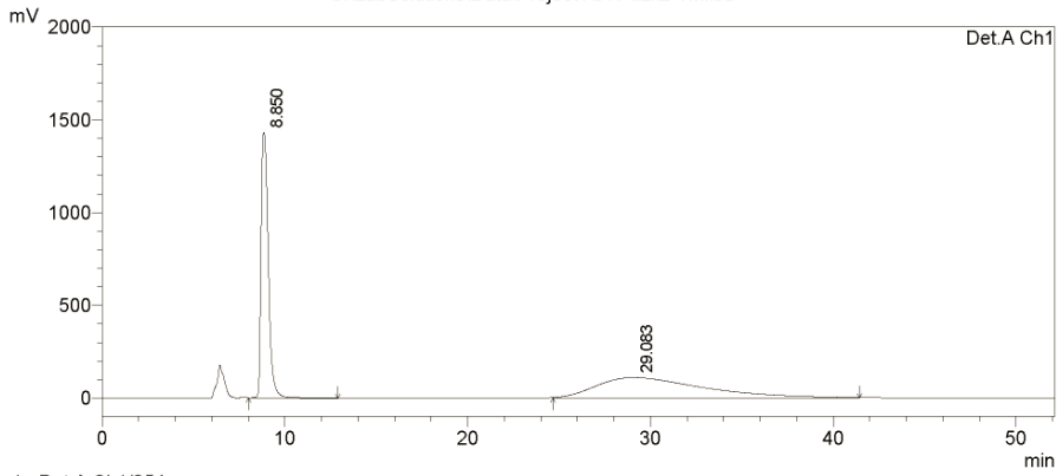

1 Det.A Ch1/254nm

PeakTable

检测器 A Ch1 254nm

| Peak# | Ret. Time | Area     | Height  | Area %  | Height % |
|-------|-----------|----------|---------|---------|----------|
| 1     | 8.850     | 39349927 | 1433171 | 46.580  | 92.883   |
| 2     | 29.083    | 45128623 | 109814  | 53.420  | 7.117    |
| Total |           | 84478549 | 1542985 | 100.000 | 100.000  |

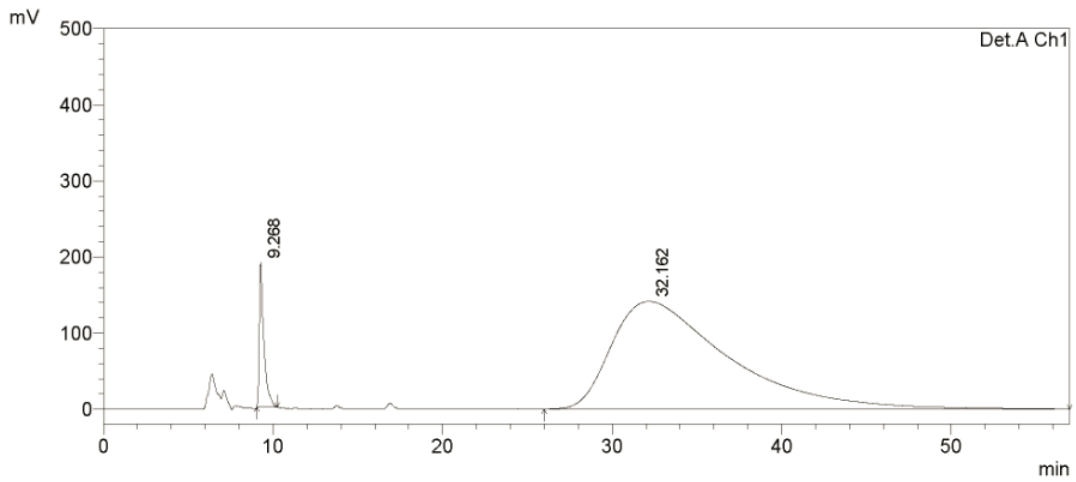

1 Det.A Ch1/254nm

PeakTable

检测器 A Ch1 254nm

| Peak# | Ret. Time | Area     | Height | Area %  | Height % |
|-------|-----------|----------|--------|---------|----------|
| 1     | 9.268     | 3581716  | 190035 | 5.020   | 57.338   |
| 2     | 32.162    | 67766947 | 141393 | 94.980  | 42.662   |
| Total |           | 71348663 | 331428 | 100.000 | 100.000  |

5c

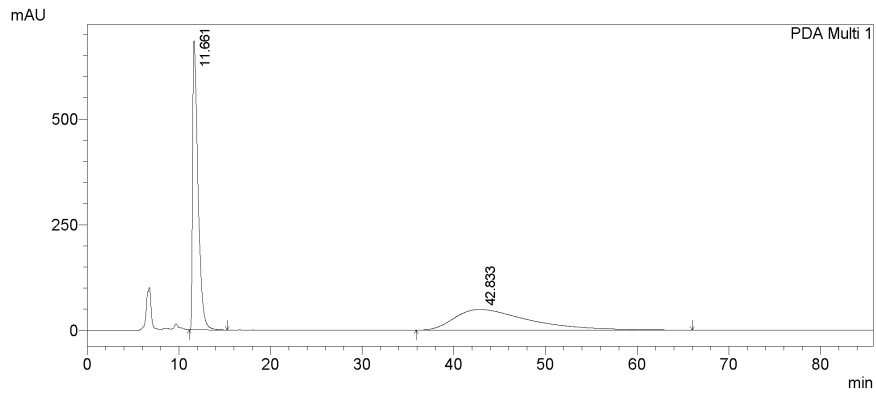

1 PDA Multi 1/254nm 4nm

PeakTable

| Peak# | Ret. Time | Area     | Height | Area %  | Height % |
|-------|-----------|----------|--------|---------|----------|
| 1     | 11.661    | 28057025 | 684201 | 50.159  | 93.290   |
| 2     | 42.833    | 27878730 | 49213  | 49.841  | 6.710    |
| Total |           | 55935755 | 733414 | 100.000 | 100.000  |

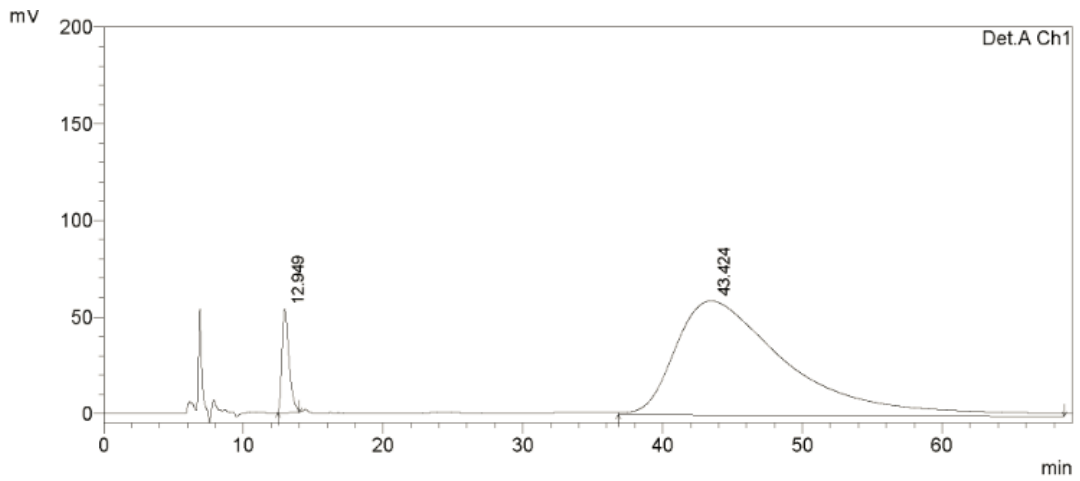

1 Det.A Ch1/254nm

PeakTable

| Peak# | Ret. Time | Area     | Height | Area %  | Height % |
|-------|-----------|----------|--------|---------|----------|
| 1     | 12.949    | 1920232  | 53922  | 5.516   | 47.726   |
| 2     | 43.424    | 32894032 | 59062  | 94.484  | 52.274   |
| Total |           | 34814265 | 112983 | 100.000 | 100.000  |

5d

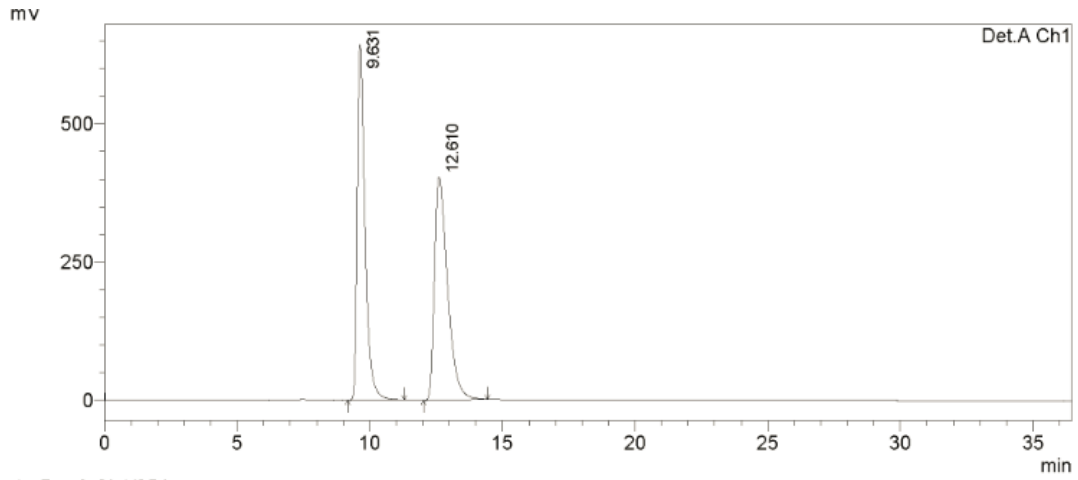

PeakTable

检测器 A Ch1 254nm

| Peak# | Ret. Time | Area     | Height  | Area %  | Height % |
|-------|-----------|----------|---------|---------|----------|
| 1     | 9.631     | 13262446 | 642311  | 49.047  | 61.450   |
| 2     | 12.610    | 13777825 | 402951  | 50.953  | 38.550   |
| Total |           | 27040271 | 1045262 | 100.000 | 100.000  |

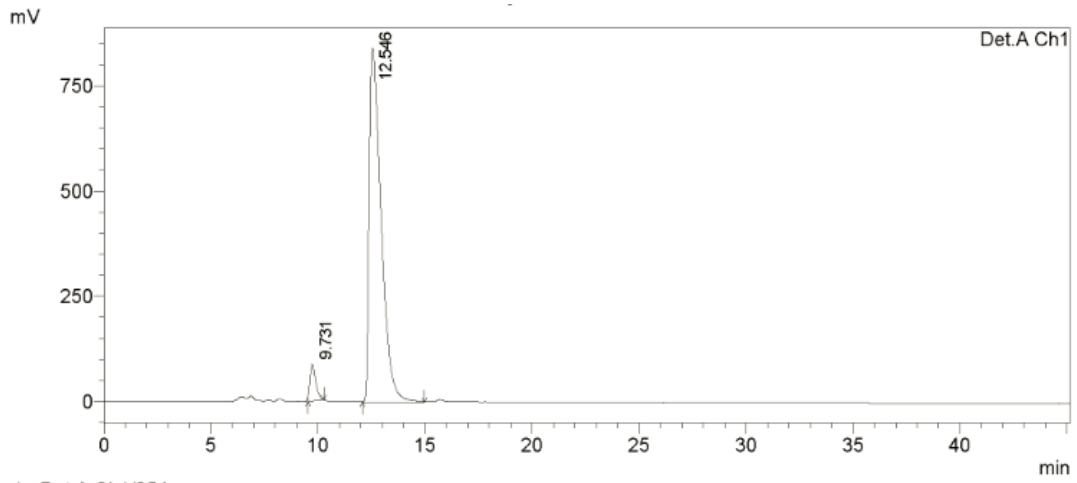

PeakTable

检测器 A Ch1 254nm

| Peak# | Ret. Time | Area     | Height | Area %  | Height % |
|-------|-----------|----------|--------|---------|----------|
| 1     | 9.731     | 1647919  | 87566  | 4.798   | 9.425    |
| 2     | 12.546    | 32695919 | 841529 | 95.202  | 90.575   |
| Total |           | 34343839 | 929095 | 100.000 | 100.000  |

5e

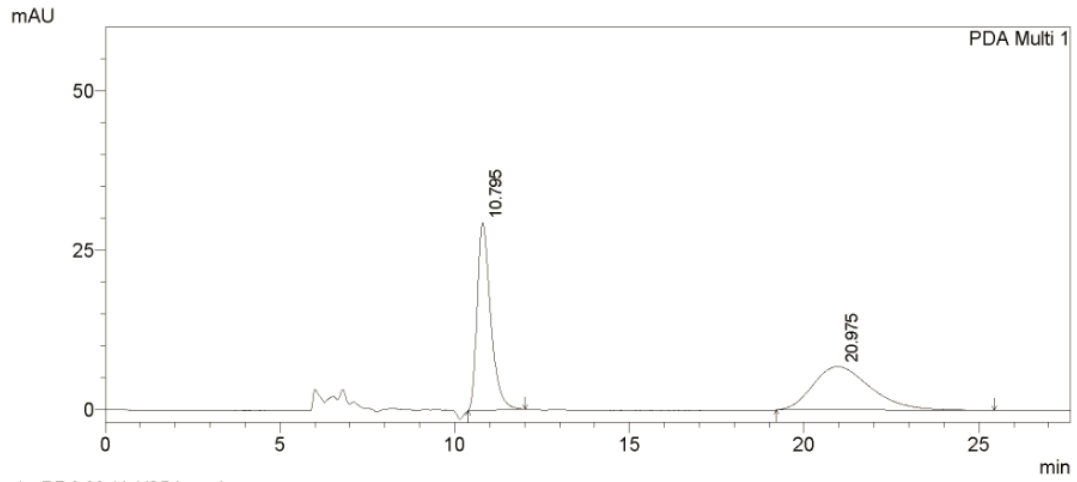

PeakTable

PDA Ch1 254nm 4nm

| Peak# | Ret. Time | Area    | Height | Area %  | Height % |
|-------|-----------|---------|--------|---------|----------|
| 1     | 10.795    | 793714  | 29394  | 50.451  | 81.172   |
| 2     | 20.975    | 779536  | 6818   | 49.549  | 18.828   |
| Total |           | 1573251 | 36212  | 100.000 | 100.000  |

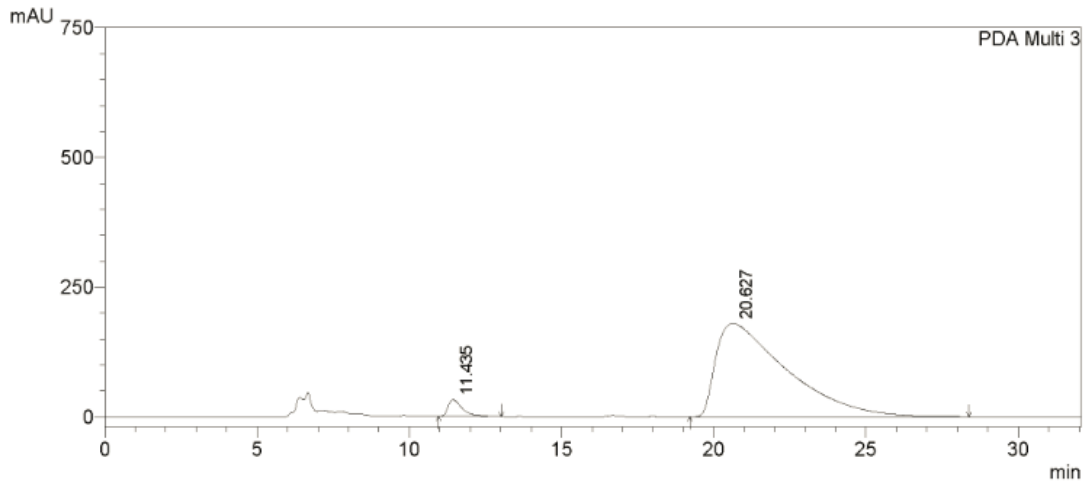

PeakTable

PDA Ch3 315nm 4nm

| Peak# | Ret. Time | Area     | Height | Area %  | Height % |
|-------|-----------|----------|--------|---------|----------|
| 1     | 11.435    | 1056501  | 32025  | 3.509   | 15.121   |
| 2     | 20.627    | 29051696 | 179769 | 96.491  | 84.879   |
| Total |           | 30108196 | 211794 | 100.000 | 100.000  |

5f

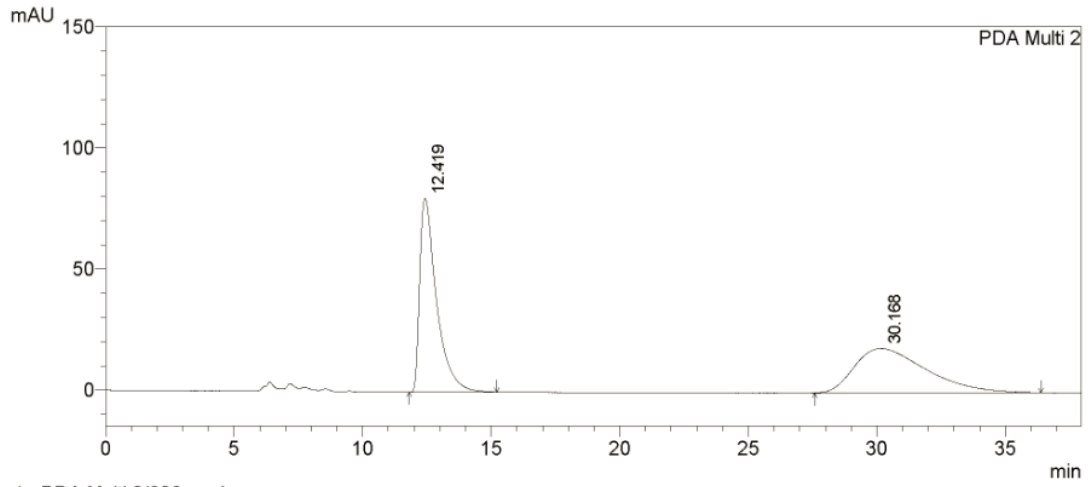

1 PDA Multi 2/328nm 4nm

PeakTable

PDA Ch2 328nm 4nm

| Peak# | Ret. Time | Area    | Height | Area %  | Height % |
|-------|-----------|---------|--------|---------|----------|
| 1     | 12.419    | 3652182 | 80264  | 50.538  | 81.373   |
| 2     | 30.168    | 3574495 | 18373  | 49.462  | 18.627   |
| Total |           | 7226677 | 98637  | 100.000 | 100.000  |

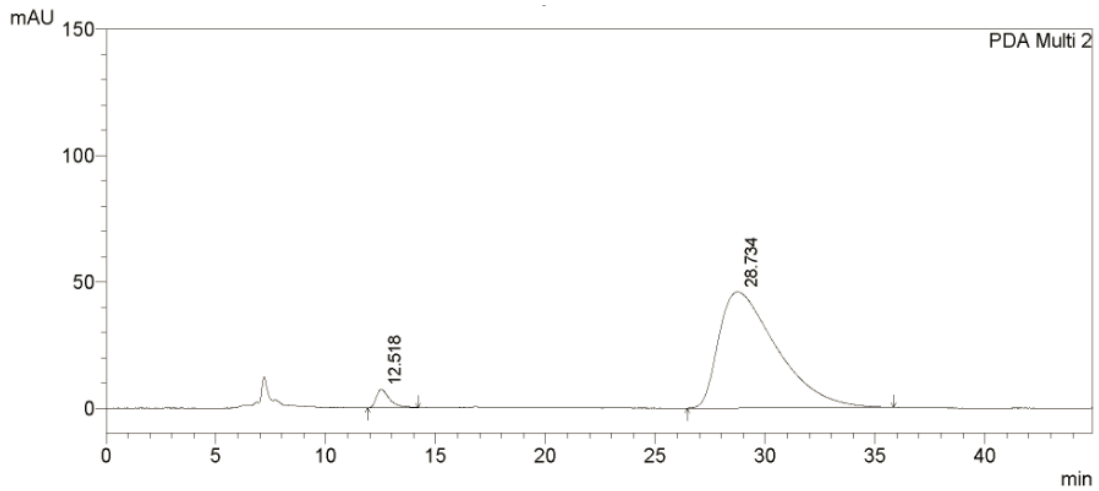

1 PDA Multi 2/315nm 4nm

PeakTable

PDA Ch2 315nm 4nm

| Peak# | Ret. Time | Area    | Height | Area %  | Height % |
|-------|-----------|---------|--------|---------|----------|
| 1     | 12.518    | 306466  | 7219   | 3.504   | 13.578   |
| 2     | 28.734    | 8440570 | 45950  | 96.496  | 86.422   |
| Total |           | 8747035 | 53169  | 100.000 | 100.000  |

5g

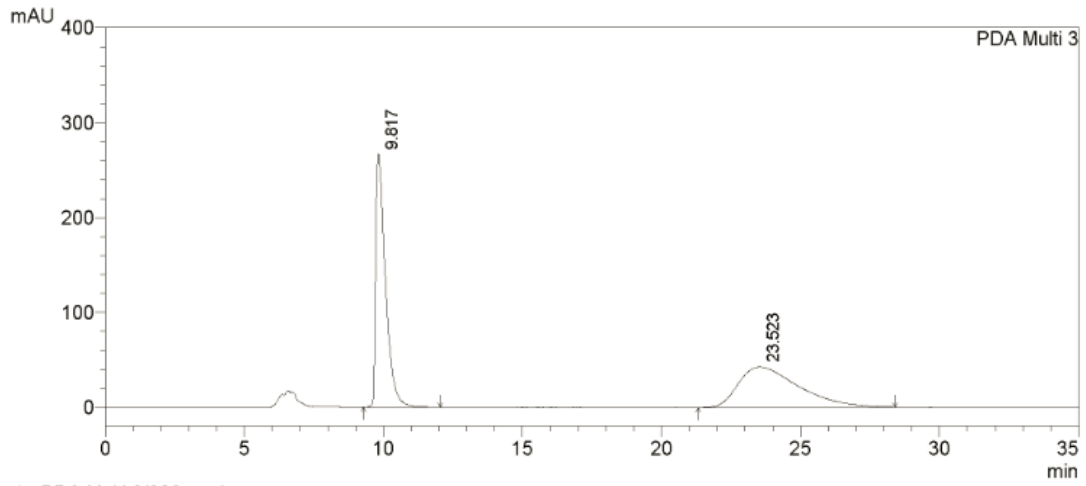

1 PDA Multi 3/320nm 4nm

PeakTable

PDA Ch3 320nm 4nm

| Peak# | Ret. Time | Area     | Height | Area %  | Height % |
|-------|-----------|----------|--------|---------|----------|
| 1     | 9.817     | 6532798  | 267105 | 50.456  | 86.231   |
| 2     | 23.523    | 6414593  | 42651  | 49.544  | 13.769   |
| Total |           | 12947390 | 309756 | 100.000 | 100.000  |

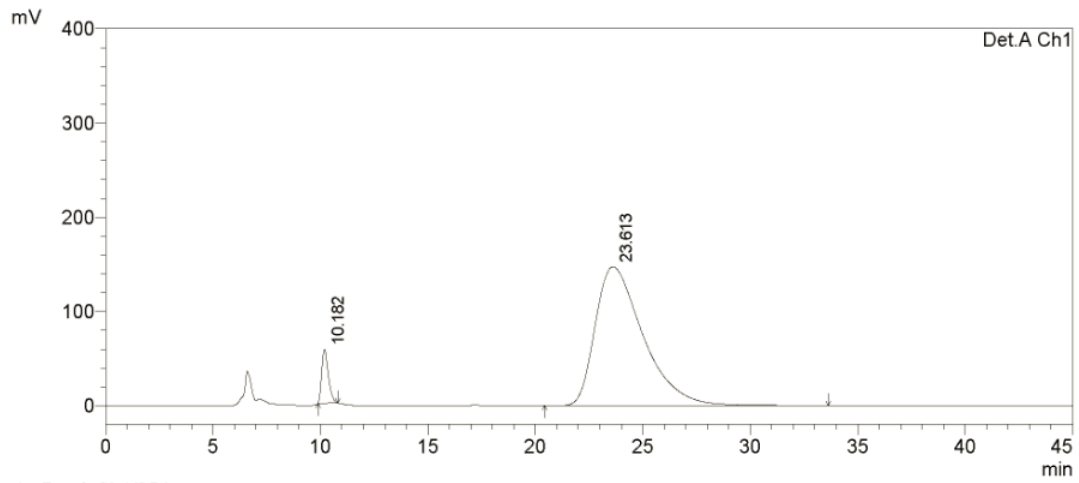

1 Det.A Ch1/254nm

PeakTable

检测器 A Ch1 254nm

| Peak# | Ret. Time | Area     | Height | Area %  | Height % |
|-------|-----------|----------|--------|---------|----------|
| 1     | 10.182    | 1231457  | 57159  | 5.126   | 27.948   |
| 2     | 23.613    | 22792259 | 147363 | 94.874  | 72.052   |
| Total |           | 24023717 | 204522 | 100.000 | 100.000  |

5h

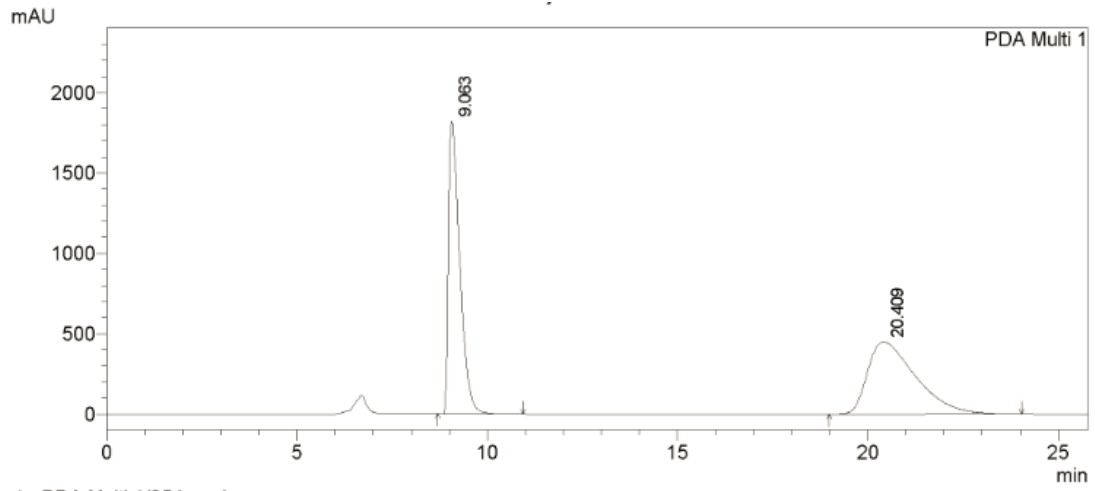

1 PDA Multi 1/254nm 4nm

PeakTable

PDA Ch1 254nm 4nm

| Peak# | Ret. Time | Area     | Height  | Area %  | Height % |
|-------|-----------|----------|---------|---------|----------|
| 1     | 9.063     | 37865449 | 1820362 | 49.061  | 80.216   |
| 2     | 20.409    | 39314782 | 448957  | 50.939  | 19.784   |
| Total |           | 77180231 | 2269319 | 100.000 | 100.000  |

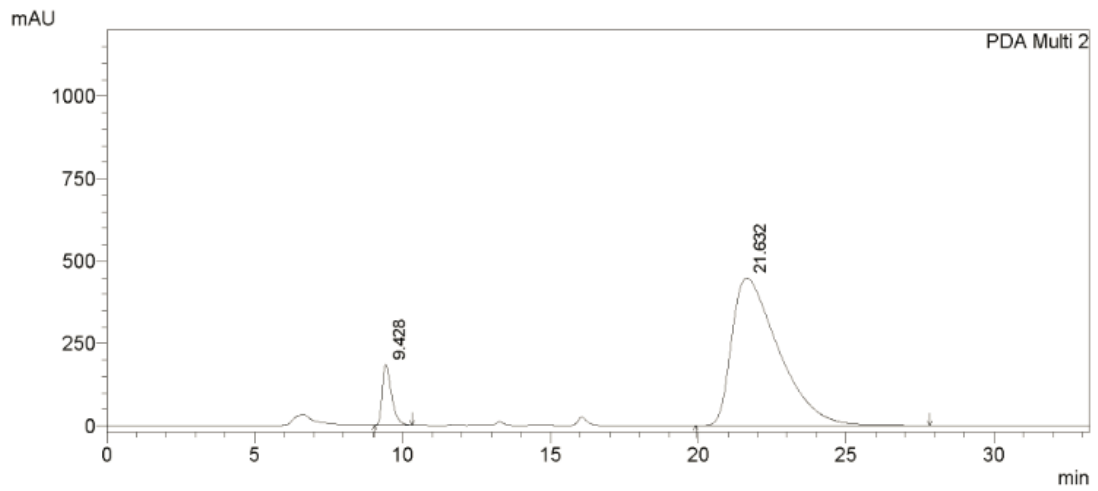

1 PDA Multi 2/260nm 4nm

PeakTable

PDA Ch2 260nm 4nm

| Peak# | Ret. Time | Area     | Height | Area %  | Height % |
|-------|-----------|----------|--------|---------|----------|
| 1     | 9.428     | 3990555  | 183548 | 7.497   | 29.083   |
| 2     | 21.632    | 49236856 | 447570 | 92.503  | 70.917   |
| Total |           | 53227411 | 631118 | 100.000 | 100.000  |



5i

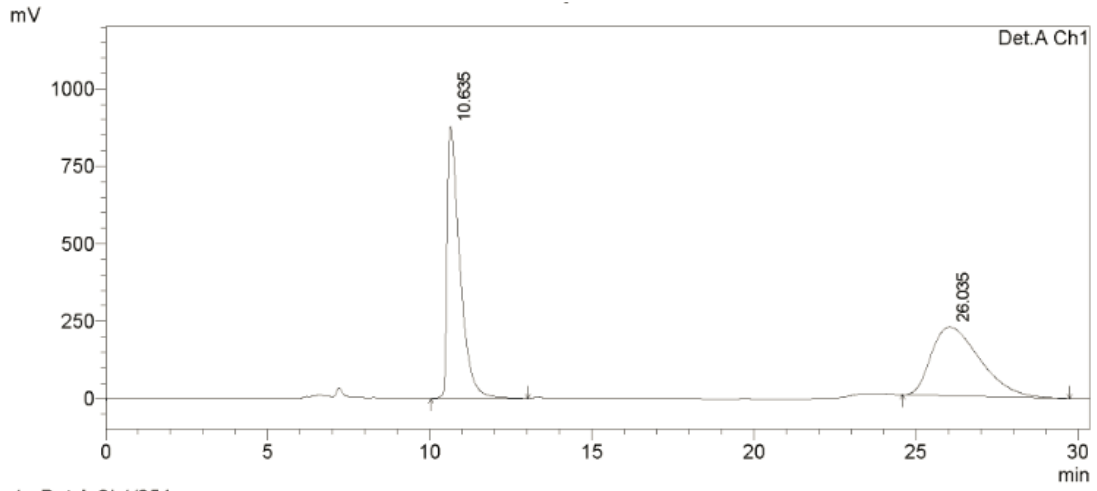

1 Det.A Ch1/254nm

PeakTable

检测器 A Ch1 254nm

| Peak# | Ret. Time | Area     | Height  | Area %  | Height % |
|-------|-----------|----------|---------|---------|----------|
| 1     | 10.635    | 23896963 | 878428  | 50.818  | 79.843   |
| 2     | 26.035    | 23127962 | 221762  | 49.182  | 20.157   |
| Total |           | 47024925 | 1100189 | 100.000 | 100.000  |

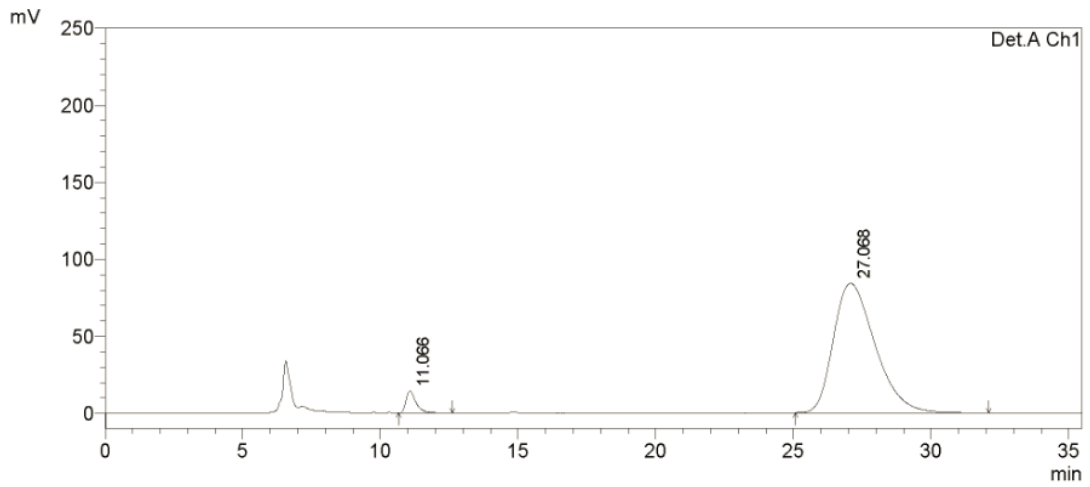

1 Det.A Ch1/254nm

PeakTable

检测器 A Ch1 254nm

| Peak# | Ret. Time | Area    | Height | Area %  | Height % |
|-------|-----------|---------|--------|---------|----------|
| 1     | 11.066    | 366134  | 14275  | 3.978   | 14.516   |
| 2     | 27.068    | 8838869 | 84064  | 96.022  | 85.484   |
| Total |           | 9205003 | 98339  | 100.000 | 100.000  |

5j

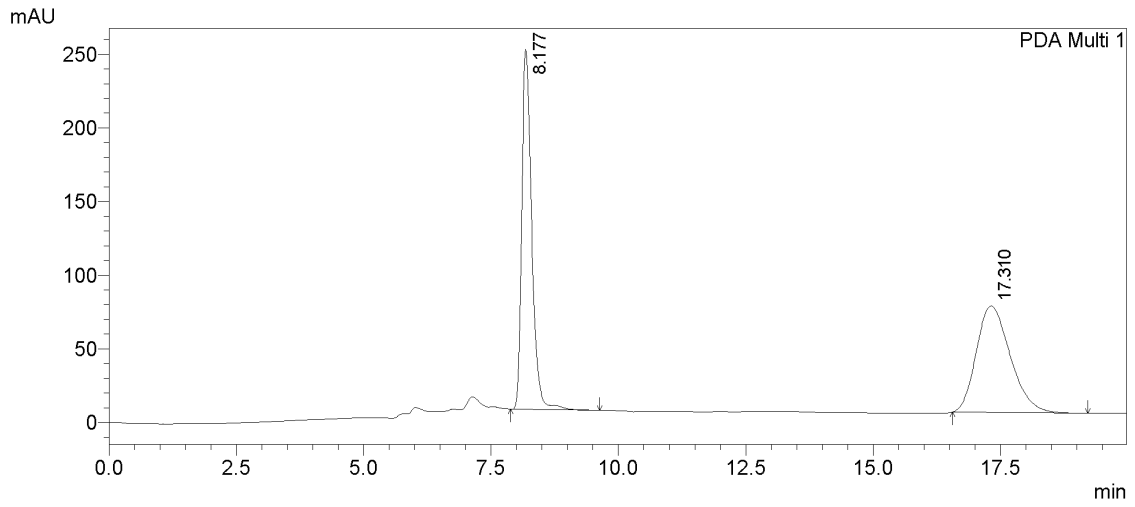

PeakTable

PDA Ch1 254nm 4nm

| Peak# | Ret. Time | Area    | Height | Area %  | Height % |
|-------|-----------|---------|--------|---------|----------|
| 1     | 8.177     | 3324062 | 244218 | 49.772  | 77.136   |
| 2     | 17.310    | 3354517 | 72387  | 50.228  | 22.864   |
| Total |           | 6678579 | 316605 | 100.000 | 100.000  |

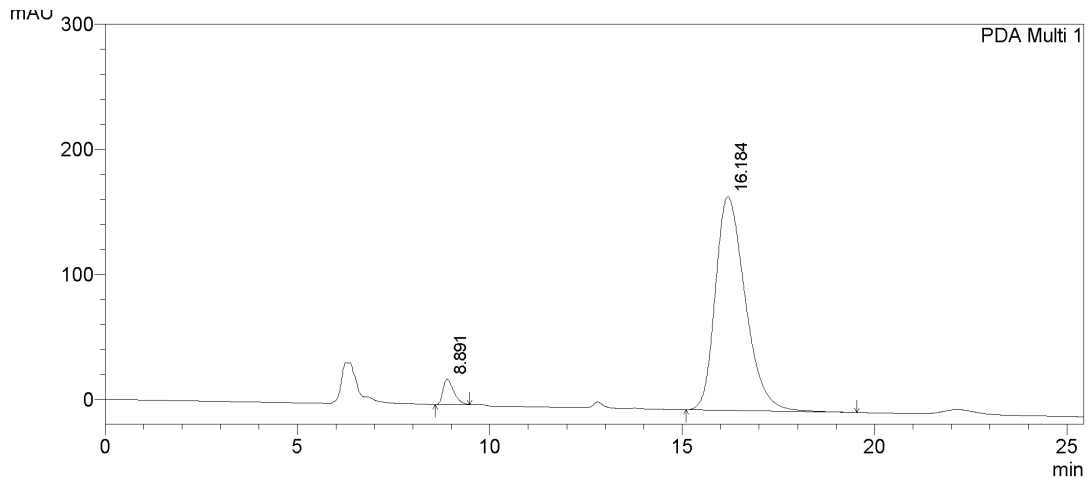

PeakTable

PDA Ch1 254nm 4nm

| Peak# | Ret. Time | Area    | Height | Area %  | Height % |
|-------|-----------|---------|--------|---------|----------|
| 1     | 8.891     | 398138  | 20357  | 4.122   | 10.637   |
| 2     | 16.184    | 9260804 | 171023 | 95.878  | 89.363   |
| Total |           | 9658942 | 191379 | 100.000 | 100.000  |

5k

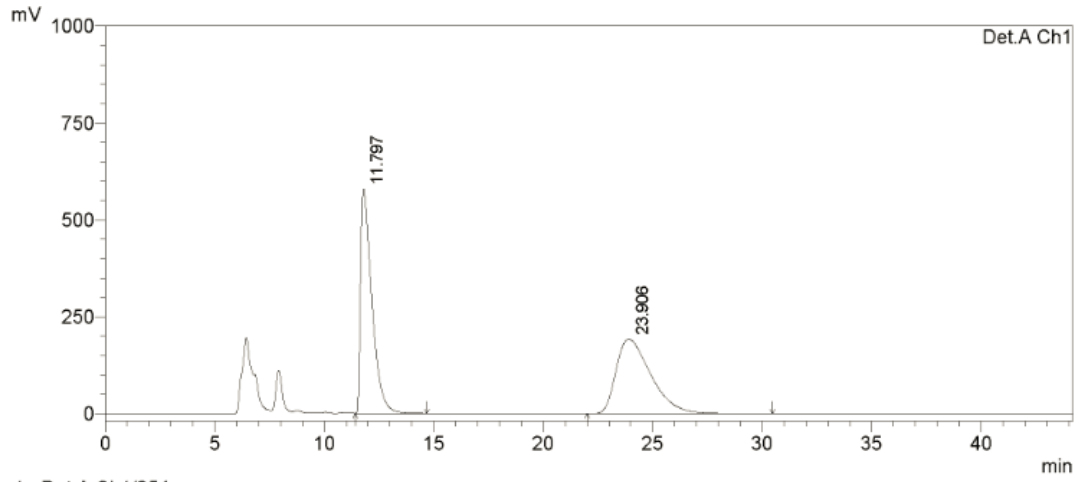

PeakTable

检测器 A Ch1 254nm

| Peak# | Ret. Time | Area     | Height | Area %  | Height % |
|-------|-----------|----------|--------|---------|----------|
| 1     | 11.797    | 20738915 | 578117 | 49.323  | 75.009   |
| 2     | 23.906    | 21308112 | 192616 | 50.677  | 24.991   |
| Total |           | 42047027 | 770732 | 100.000 | 100.000  |

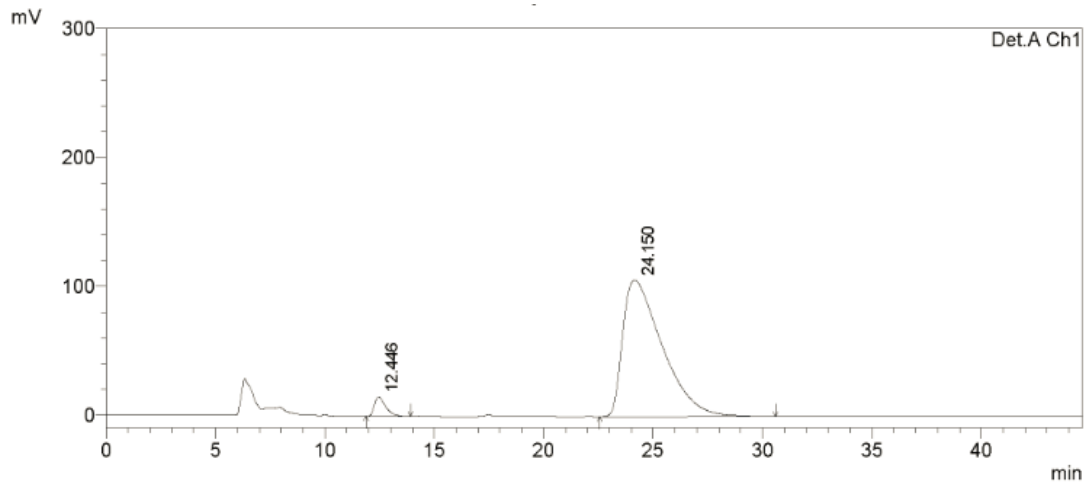

PeakTable

检测器 A Ch1 310nm

| Peak# | Ret. Time | Area     | Height | Area %  | Height % |
|-------|-----------|----------|--------|---------|----------|
| 1     | 12.446    | 549969   | 15191  | 3.987   | 12.548   |
| 2     | 24.150    | 13242421 | 105868 | 96.013  | 87.452   |
| Total |           | 13792389 | 121059 | 100.000 | 100.000  |

51

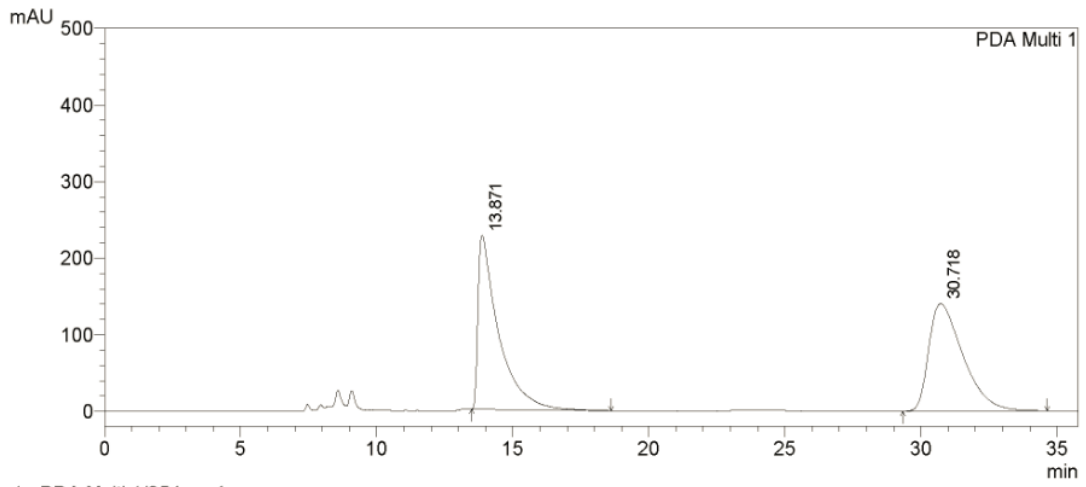

PeakTable

PDA Ch1 254nm 4nm

| Peak# | Ret. Time | Area     | Height | Area %  | Height % |
|-------|-----------|----------|--------|---------|----------|
| 1     | 13.871    | 11866112 | 226808 | 49.164  | 61.772   |
| 2     | 30.718    | 12269827 | 140364 | 50.836  | 38.228   |
| Total |           | 24135939 | 367172 | 100.000 | 100.000  |

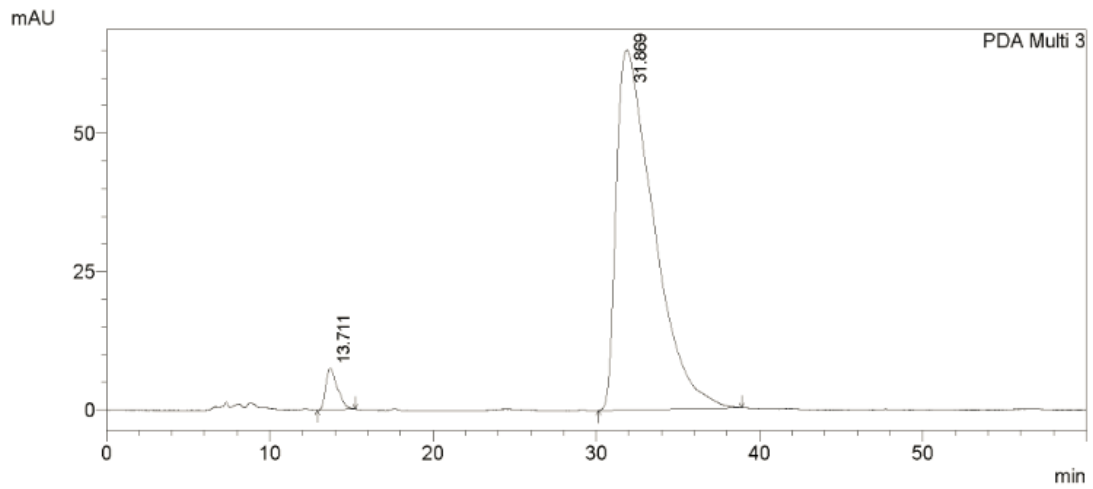

PeakTable

PDA Ch3 319nm 4nm

| Peak# | Ret. Time | Area     | Height | Area %  | Height % |
|-------|-----------|----------|--------|---------|----------|
| 1     | 13.711    | 372039   | 7516   | 3.467   | 10.358   |
| 2     | 31.869    | 10359867 | 65050  | 96.533  | 89.642   |
| Total |           | 10731906 | 72567  | 100.000 | 100.000  |

5m

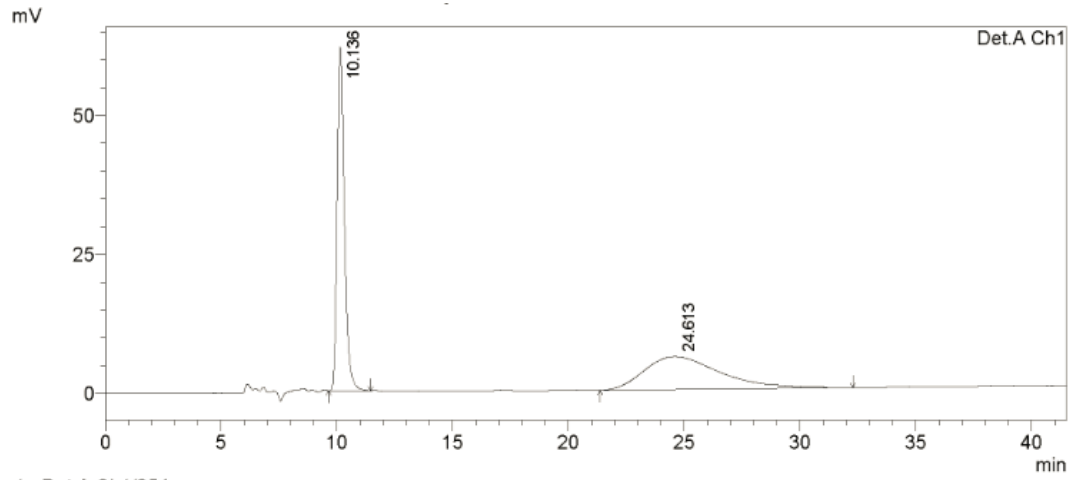

1 Det.A Ch1/254nm

PeakTable

检测器 A Ch1 254nm

| Peak# | Ret. Time | Area    | Height | Area %  | Height % |
|-------|-----------|---------|--------|---------|----------|
| 1     | 10.136    | 1356923 | 61761  | 50.112  | 91.253   |
| 2     | 24.613    | 1350882 | 5920   | 49.888  | 8.747    |
| Total |           | 2707805 | 67681  | 100.000 | 100.000  |

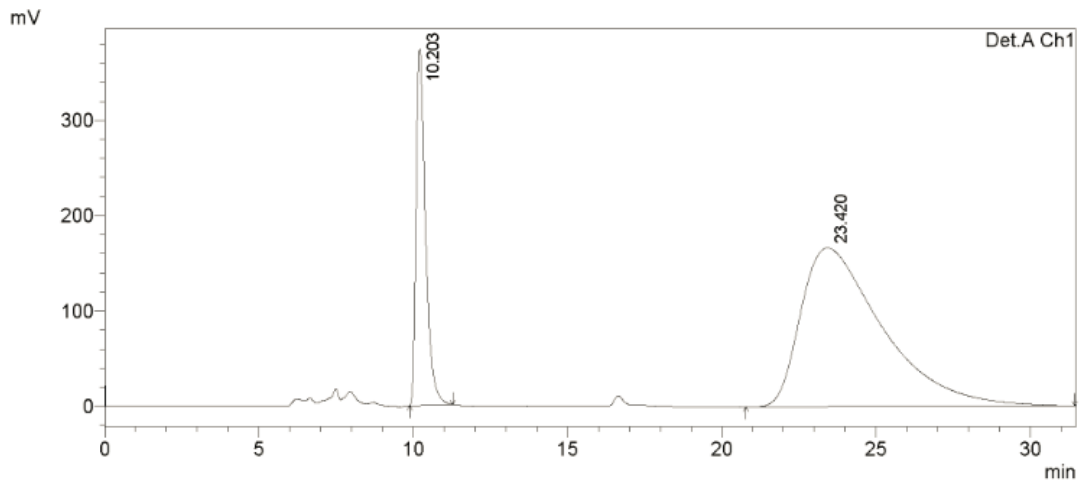

1 Det.A Ch1/254nm

PeakTable

检测器 A Ch1 254nm

| Peak# | Ret. Time | Area     | Height | Area %  | Height % |
|-------|-----------|----------|--------|---------|----------|
| 1     | 10.203    | 7942882  | 373558 | 20.535  | 69.149   |
| 2     | 23.420    | 30737224 | 166665 | 79.465  | 30.851   |
| Total |           | 38680106 | 540223 | 100.000 | 100.000  |

5n

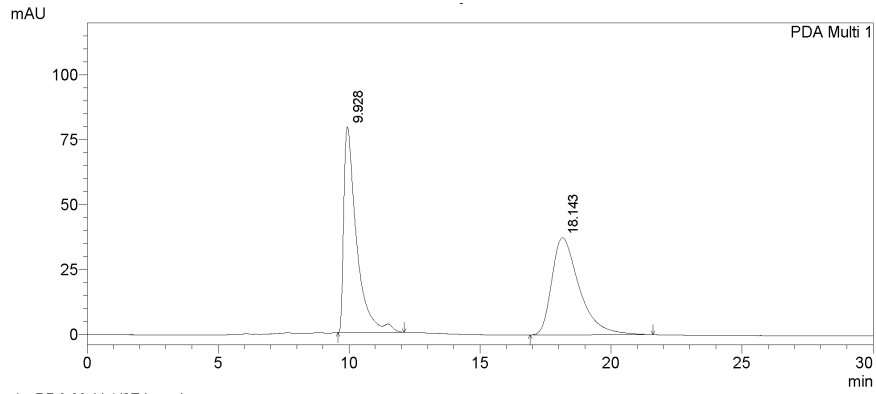

PeakTable

| Peak# | Ret. Time | Area    | Height | Area %  | Height % |
|-------|-----------|---------|--------|---------|----------|
| 1     | 9.928     | 2694249 | 79195  | 49.709  | 67.924   |
| 2     | 18.143    | 2725824 | 37399  | 50.291  | 32.076   |
| Total |           | 5420073 | 116595 | 100.000 | 100.000  |

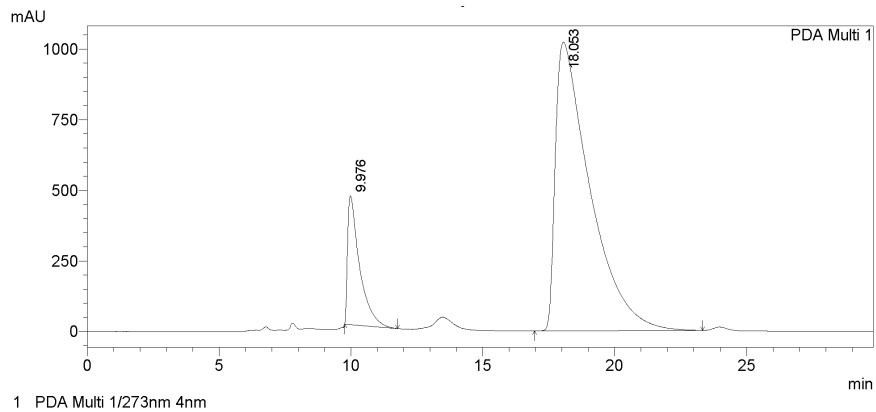

PeakTable

| Peak# | Ret. Time | Area      | Height  | Area %  | Height % |
|-------|-----------|-----------|---------|---------|----------|
| 1     | 9.976     | 14372106  | 457266  | 13.353  | 30.916   |
| 2     | 18.053    | 93259337  | 1021773 | 86.647  | 69.084   |
| Total |           | 107631443 | 1479039 | 100.000 | 100.000  |

50

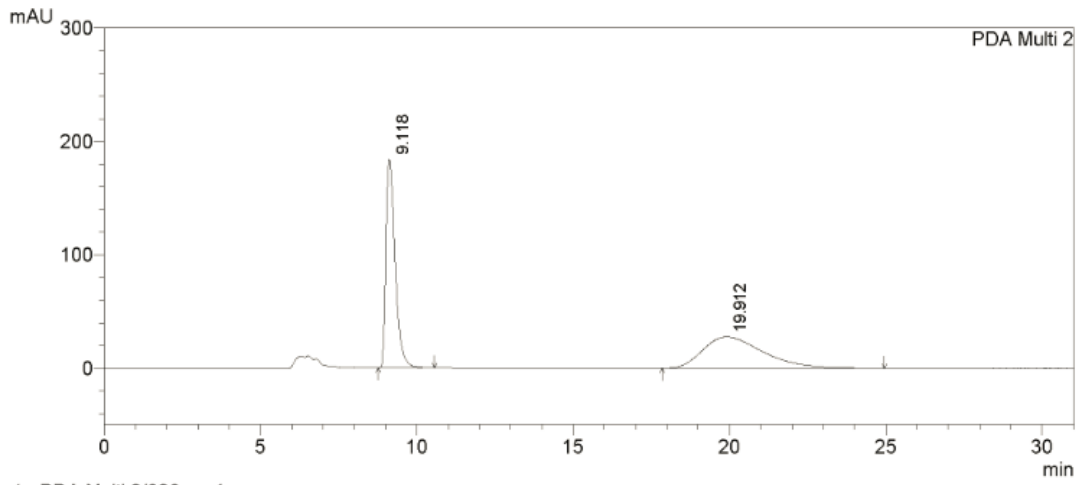

1 PDA Multi 2/320nm 4nm

PeakTable

PDA Ch2 320nm 4nm

| Peak# | Ret. Time | Area    | Height | Area %  | Height % |
|-------|-----------|---------|--------|---------|----------|
| 1     | 9.118     | 3773048 | 184129 | 50.077  | 86.873   |
| 2     | 19.912    | 3761417 | 27823  | 49.923  | 13.127   |
| Total |           | 7534466 | 211951 | 100.000 | 100.000  |

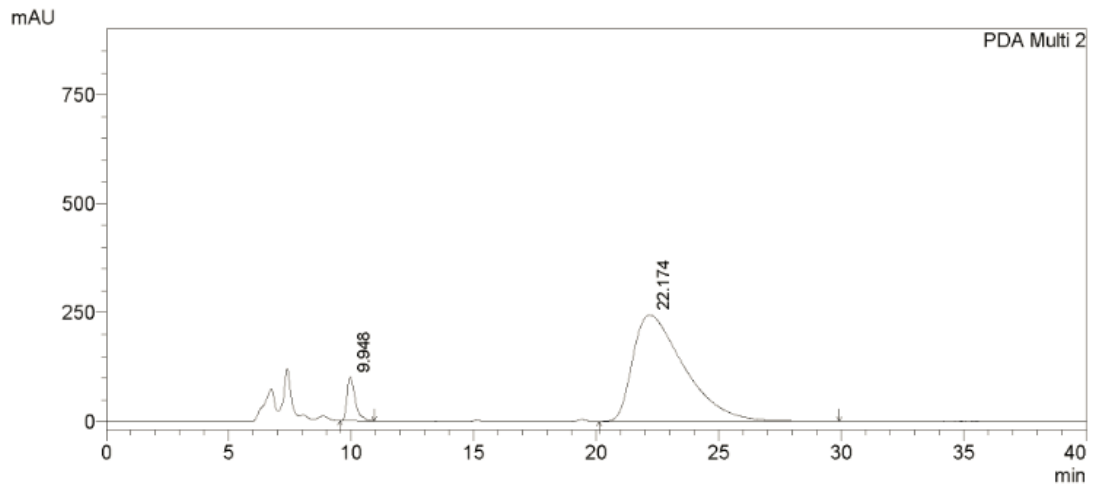

1 PDA Multi 2/284nm 4nm

PeakTable

PDA Ch2 284nm 4nm

| Peak# | Ret. Time | Area     | Height | Area %  | Height % |
|-------|-----------|----------|--------|---------|----------|
| 1     | 9.948     | 2357032  | 100586 | 6.202   | 29.146   |
| 2     | 22.174    | 35648022 | 244525 | 93.798  | 70.854   |
| Total |           | 38005053 | 345110 | 100.000 | 100.000  |

5p

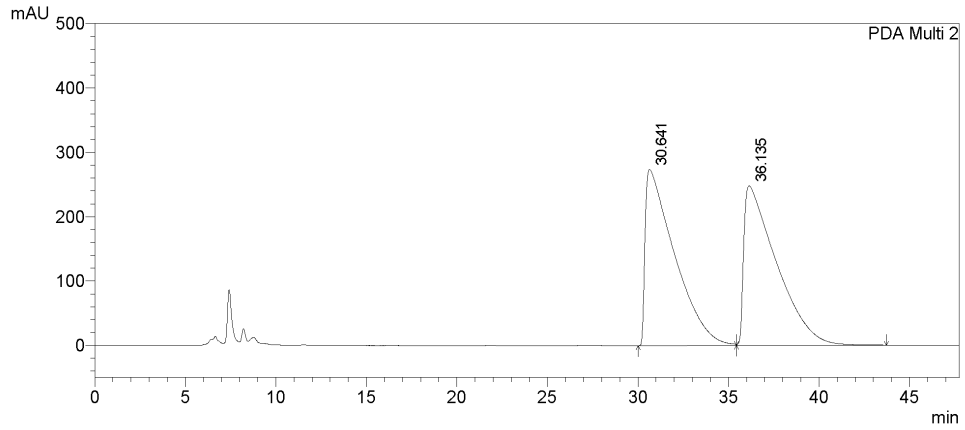

1 PDA Multi 2/268nm 4nm

PeakTable

PDA Ch2 268nm 4nm

| Peak# | Ret. Time | Area     | Height | Area %  | Height % |
|-------|-----------|----------|--------|---------|----------|
| 1     | 30.641    | 30859702 | 273854 | 49.844  | 52.479   |
| 2     | 36.135    | 31053042 | 247983 | 50.156  | 47.521   |
| Total |           | 61912744 | 521836 | 100.000 | 100.000  |

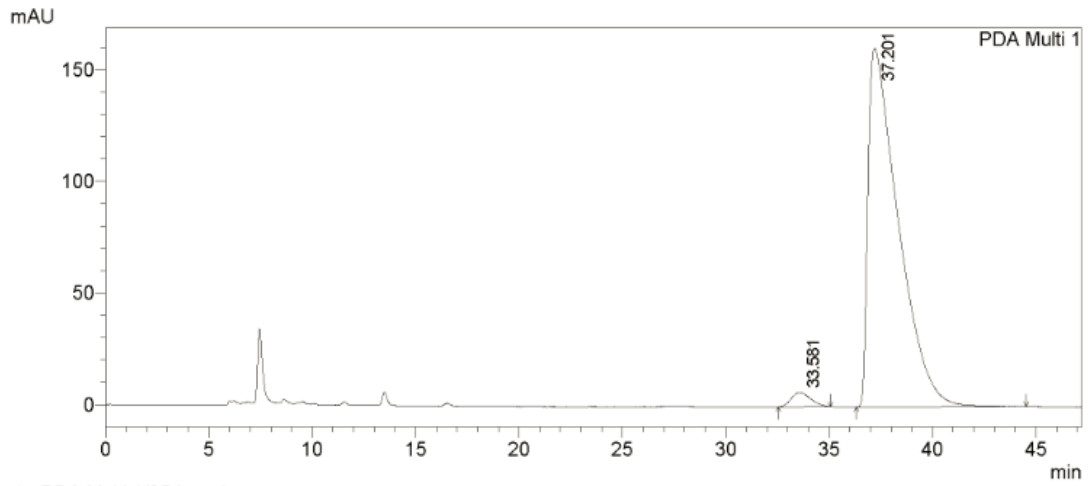

1 PDA Multi 1/254nm 4nm

PeakTable

PDA Ch1 254nm 4nm

| Peak# | Ret. Time | Area     | Height | Area %  | Height % |
|-------|-----------|----------|--------|---------|----------|
| 1     | 33.581    | 417952   | 6460   | 2.493   | 3.865    |
| 2     | 37.201    | 16349598 | 160684 | 97.507  | 96.135   |
| Total |           | 16767549 | 167144 | 100.000 | 100.000  |



5q

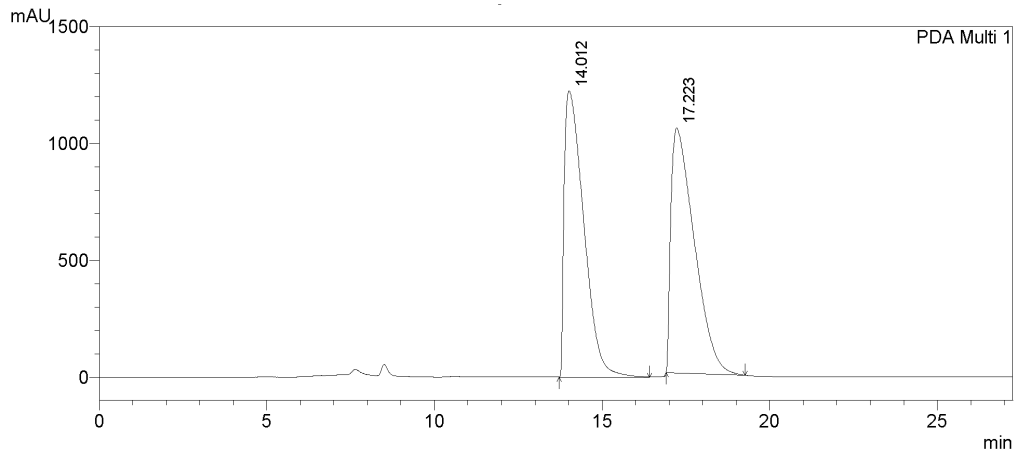

1 PDA Multi 1/254nm 4nm

PeakTable

PDA Ch1 254nm 4nm

| Peak# | Ret. Time | Area      | Height  | Area %  | Height % |
|-------|-----------|-----------|---------|---------|----------|
| 1     | 14.012    | 49711551  | 1226362 | 49.402  | 53.853   |
| 2     | 17.223    | 50914734  | 1050872 | 50.598  | 46.147   |
| Total |           | 100626284 | 2277234 | 100.000 | 100.000  |

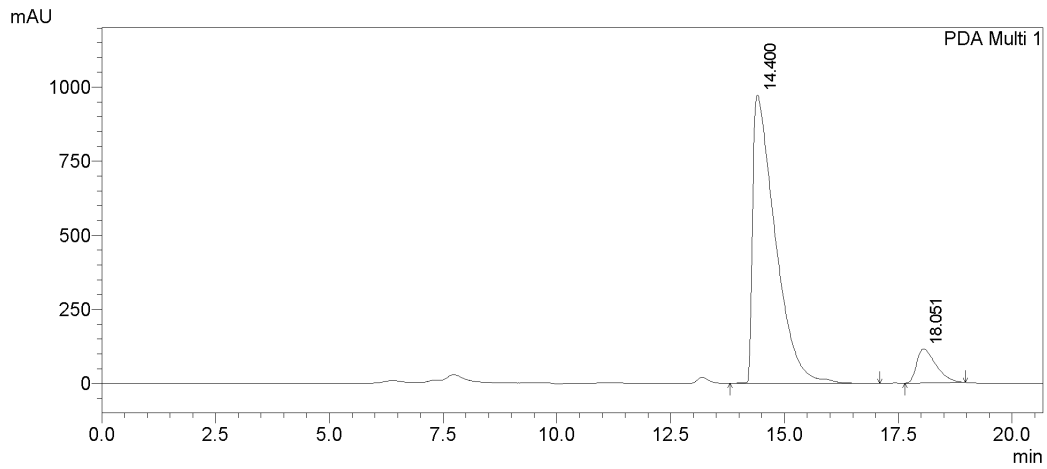

1 PDA Multi 1/254nm 4nm

PeakTable

PDA Ch1 254nm 4nm

| Peak# | Ret. Time | Area     | Height  | Area %  | Height % |
|-------|-----------|----------|---------|---------|----------|
| 1     | 14.400    | 33493084 | 973102  | 90.803  | 89.454   |
| 2     | 18.051    | 3392253  | 114717  | 9.197   | 10.546   |
| Total |           | 36885336 | 1087819 | 100.000 | 100.000  |

5s

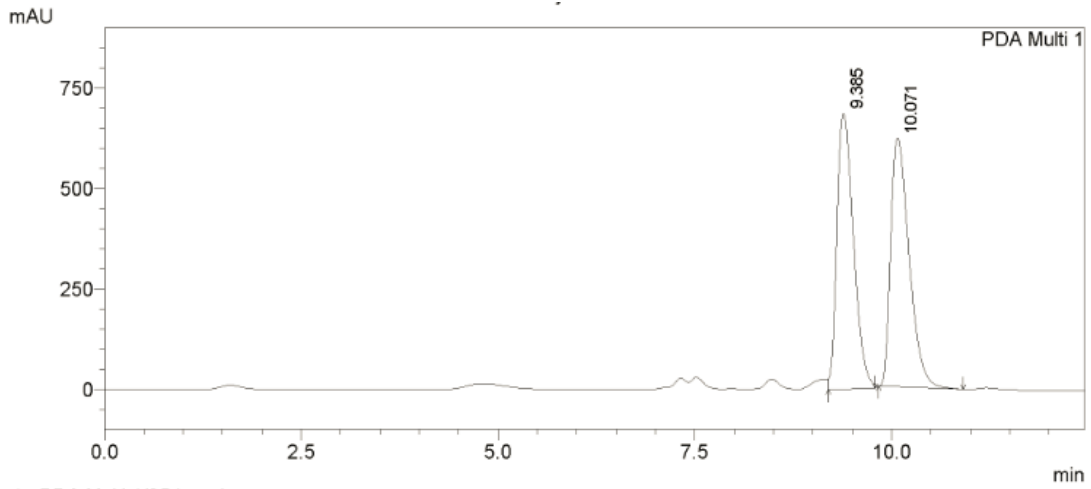

1 PDA Multi 1/254nm 4nm

PeakTable

PDA Ch1 254nm 4nm

| Peak# | Ret. Time | Area     | Height  | Area %  | Height % |
|-------|-----------|----------|---------|---------|----------|
| 1     | 9.385     | 10013169 | 686750  | 49.819  | 52.562   |
| 2     | 10.071    | 10085797 | 619804  | 50.181  | 47.438   |
| Total |           | 20098966 | 1306554 | 100.000 | 100.000  |

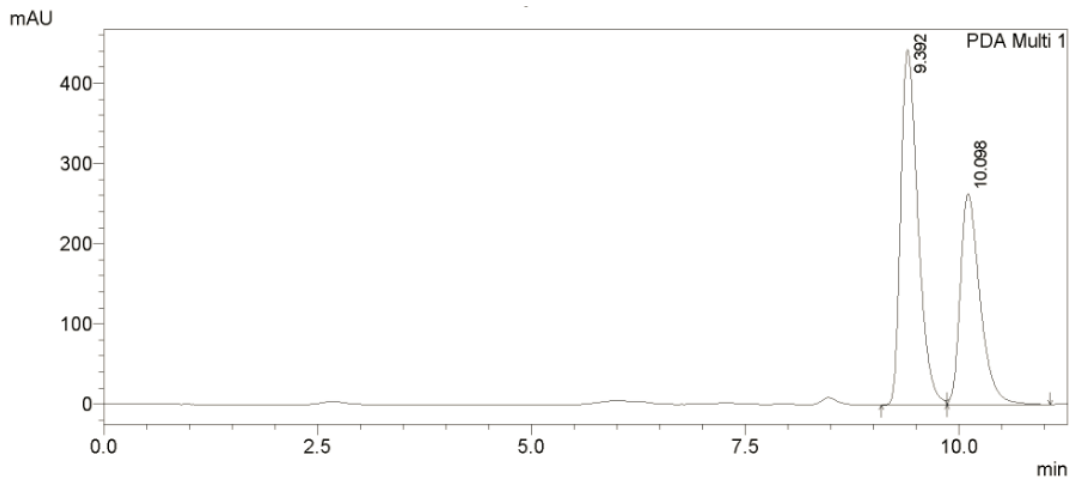

1 PDA Multi 1/254nm 4nm

PeakTable

PDA Ch1 254nm 4nm

| Peak# | Ret. Time | Area     | Height | Area %  | Height % |
|-------|-----------|----------|--------|---------|----------|
| 1     | 9.392     | 6217130  | 442897 | 59.549  | 62.720   |
| 2     | 10.098    | 4223211  | 263258 | 40.451  | 37.280   |
| Total |           | 10440342 | 706155 | 100.000 | 100.000  |

5t

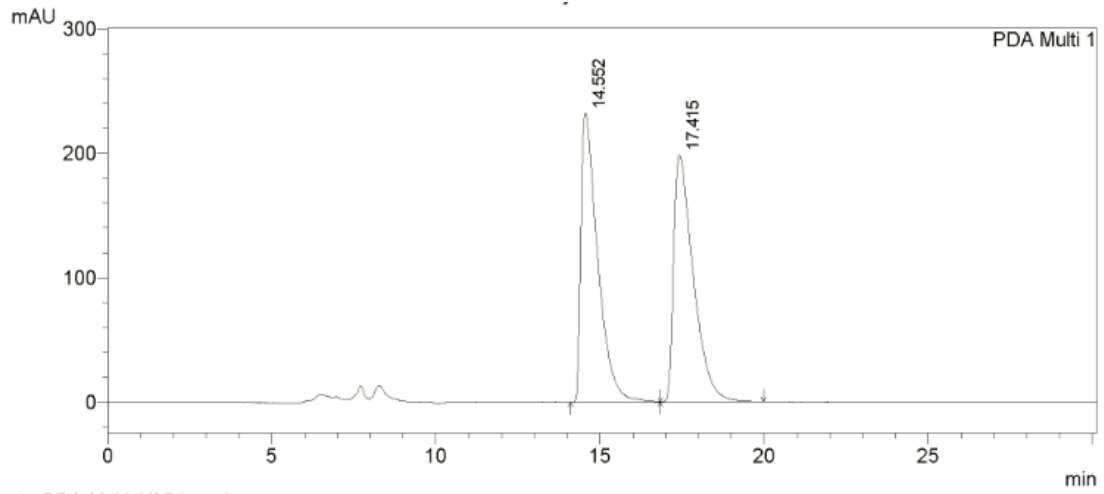

1 PDA Multi 1/254nm 4nm

PeakTable

PDA Ch1 254nm 4nm

| Peak# | Ret. Time | Area     | Height | Area %  | Height % |
|-------|-----------|----------|--------|---------|----------|
| 1     | 14.552    | 8250819  | 231942 | 49.950  | 53.942   |
| 2     | 17.415    | 8267313  | 198042 | 50.050  | 46.058   |
| Total |           | 16518132 | 429984 | 100.000 | 100.000  |

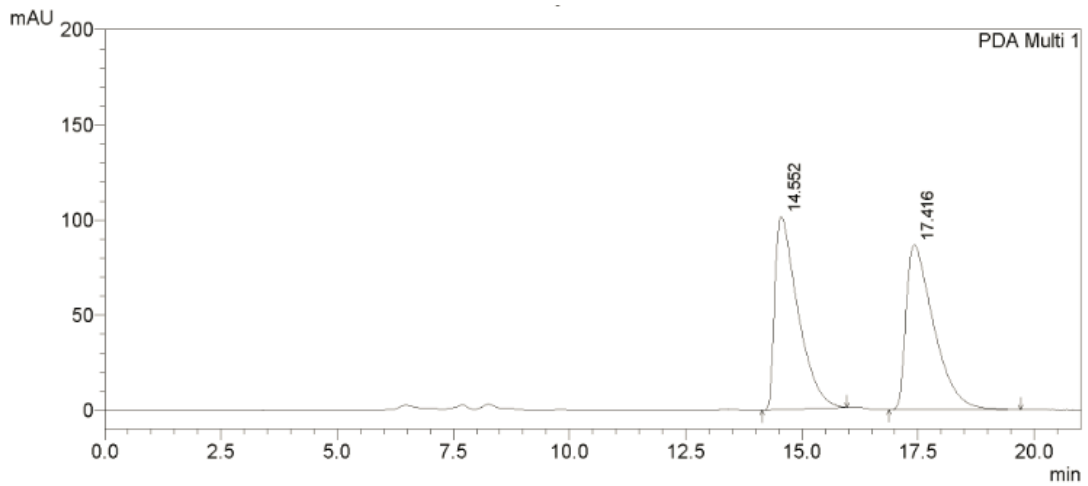

1 PDA Multi 1/288nm 4nm

PeakTable

PDA Ch1 288nm 4nm

| Peak# | Ret. Time | Area    | Height | Area %  | Height % |
|-------|-----------|---------|--------|---------|----------|
| 1     | 14.552    | 3506407 | 101361 | 49.315  | 53.913   |
| 2     | 17.416    | 3603847 | 86649  | 50.685  | 46.087   |
| Total |           | 7110254 | 188009 | 100.000 | 100.000  |

5u

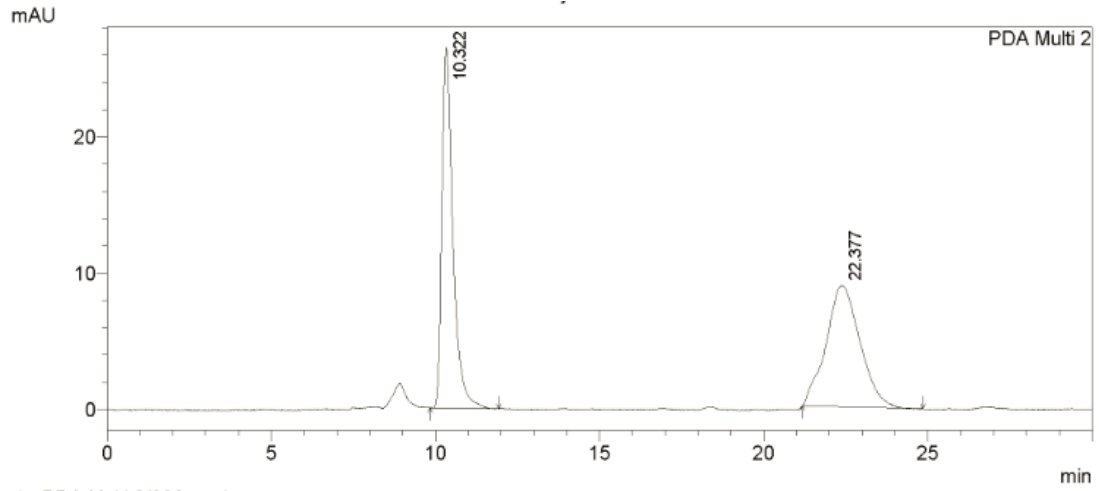

1 PDA Multi 2/326nm 4nm

PeakTable

PDA Ch2 326nm 4nm

| Peak# | Ret. Time | Area    | Height | Area %  | Height % |
|-------|-----------|---------|--------|---------|----------|
| 1     | 10.322    | 622309  | 26448  | 49.167  | 74.791   |
| 2     | 22.377    | 643398  | 8914   | 50.833  | 25.209   |
| Total |           | 1265707 | 35363  | 100.000 | 100.000  |

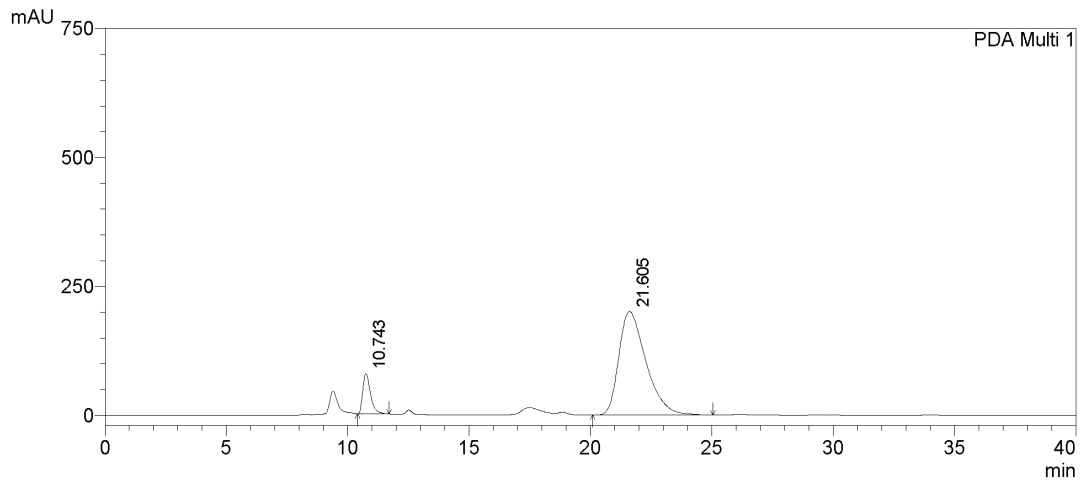

1 PDA Multi 1/254nm 4nm

PeakTable

PDA Ch1 254nm 4nm

| Peak# | Ret. Time | Area     | Height | Area %  | Height % |
|-------|-----------|----------|--------|---------|----------|
| 1     | 10.743    | 1739240  | 78057  | 10.018  | 27.989   |
| 2     | 21.605    | 15621158 | 200830 | 89.982  | 72.011   |
| Total |           | 17360398 | 278888 | 100.000 | 100.000  |

5v

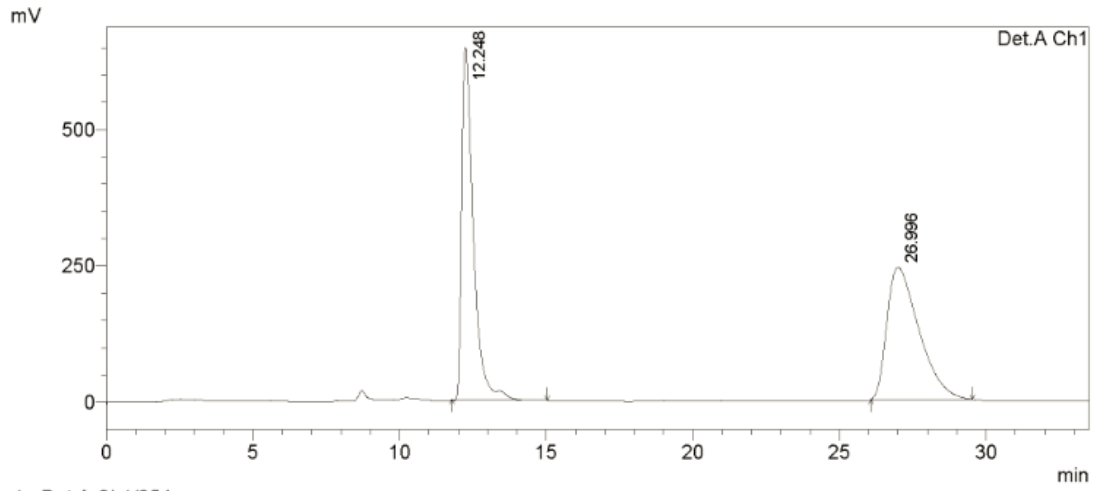

1 Det.A Ch1/254nm

PeakTable

检测器 A Ch1 254nm

| Peak# | Ret. Time | Area     | Height | Area %  | Height % |
|-------|-----------|----------|--------|---------|----------|
| 1     | 12.248    | 17829515 | 645775 | 49.161  | 72.711   |
| 2     | 26.996    | 18438237 | 242362 | 50.839  | 27.289   |
| Total |           | 36267752 | 888137 | 100.000 | 100.000  |

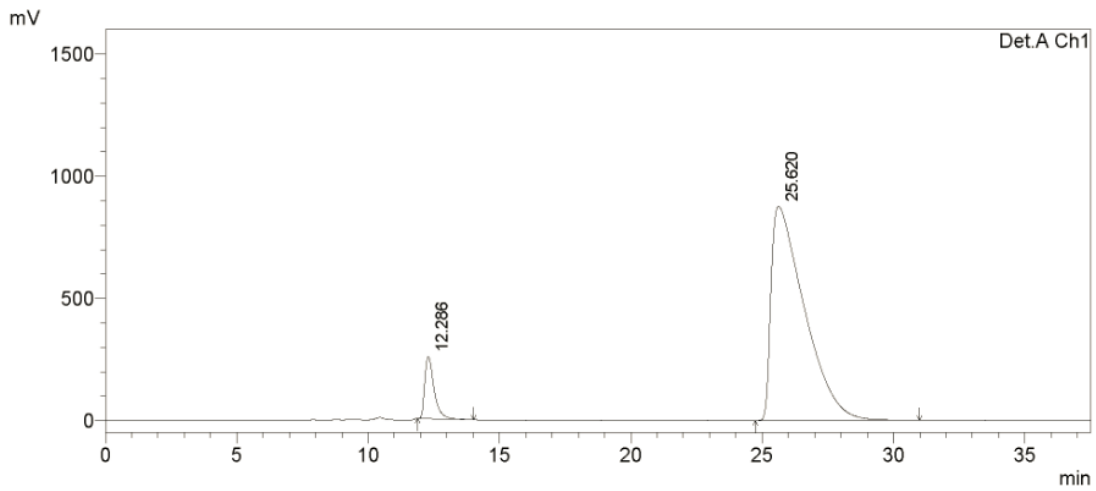

1 Det.A Ch1/254nm

PeakTable

检测器 A Ch1 254nm

| Peak# | Ret. Time | Area     | Height  | Area %  | Height % |
|-------|-----------|----------|---------|---------|----------|
| 1     | 12.286    | 6302171  | 255286  | 7.525   | 22.532   |
| 2     | 25.620    | 77444884 | 877722  | 92.475  | 77.468   |
| Total |           | 83747055 | 1133009 | 100.000 | 100.000  |

5w

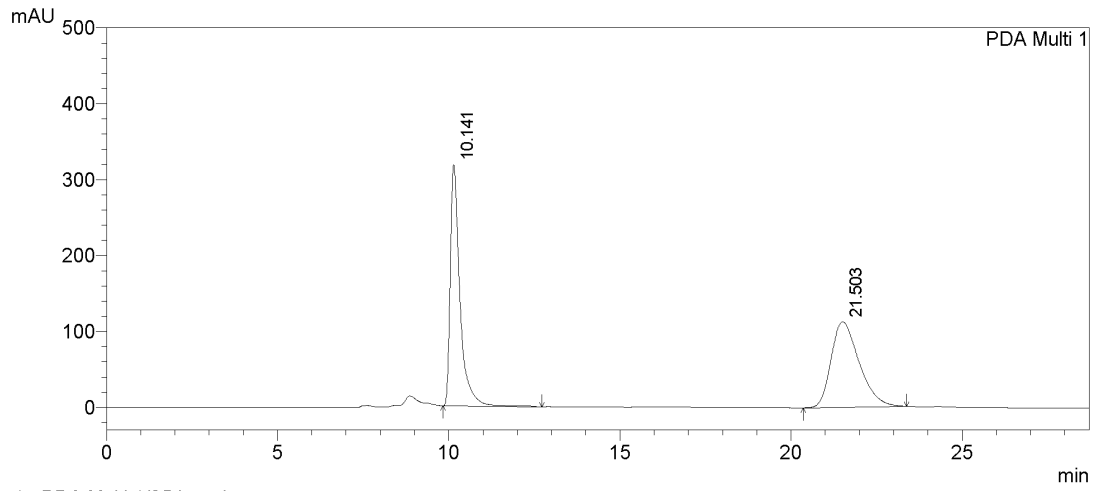

PeakTable

PDA Ch1 254nm 4nm

| Peak# | Ret. Time | Area     | Height | Area %  | Height % |
|-------|-----------|----------|--------|---------|----------|
| 1     | 10.141    | 6318941  | 317664 | 49.609  | 73.835   |
| 2     | 21.503    | 6418674  | 112568 | 50.391  | 26.165   |
| Total |           | 12737614 | 430232 | 100.000 | 100.000  |

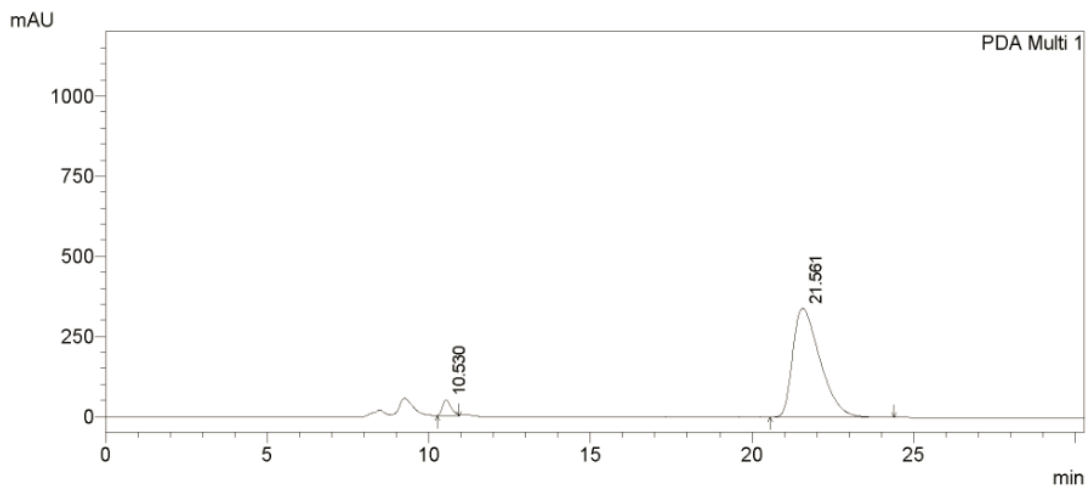

PeakTable

PDA Ch1 254nm 4nm

| Peak# | Ret. Time | Area     | Height | Area %  | Height % |
|-------|-----------|----------|--------|---------|----------|
| 1     | 10.530    | 938692   | 49951  | 4.496   | 12.820   |
| 2     | 21.561    | 19941558 | 339674 | 95.504  | 87.180   |
| Total |           | 20880250 | 389625 | 100.000 | 100.000  |

5x

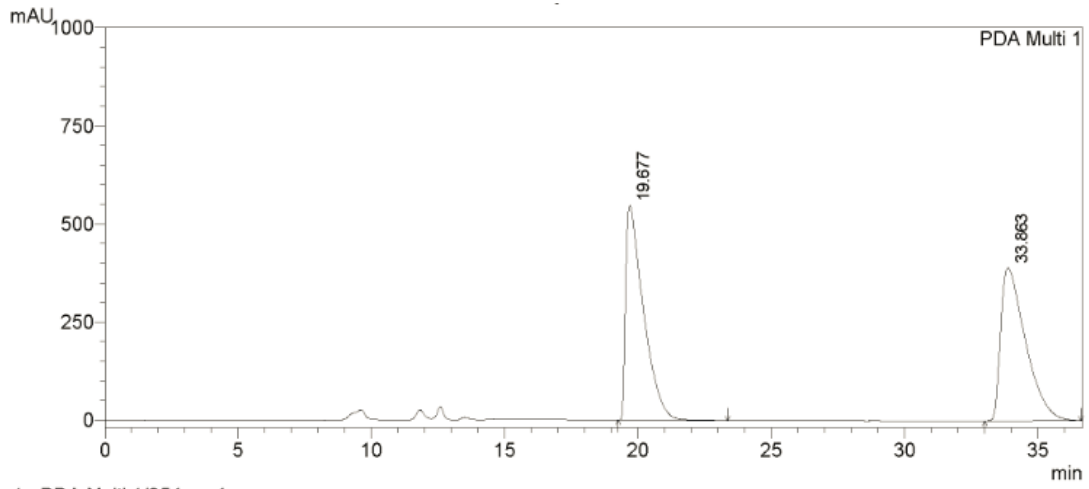

1 PDA Multi 1/254nm 4nm

PeakTable

PDA Ch1 254nm 4nm

| Peak# | Ret. Time | Area     | Height | Area %  | Height % |
|-------|-----------|----------|--------|---------|----------|
| 1     | 19.677    | 25362632 | 546684 | 50.165  | 58.403   |
| 2     | 33.863    | 25196284 | 389376 | 49.835  | 41.597   |
| Total |           | 50558916 | 936060 | 100.000 | 100.000  |

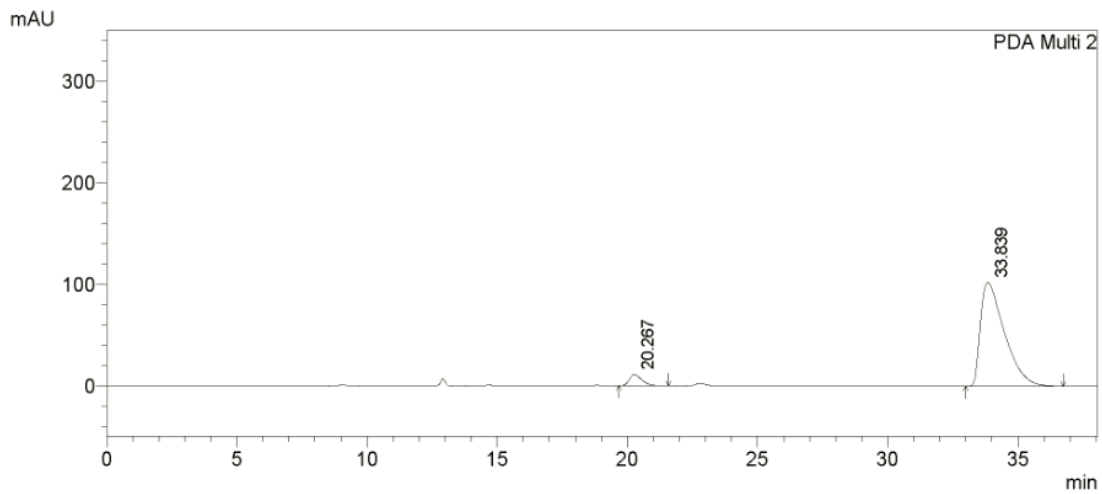

1 PDA Multi 2/326nm 4nm

PeakTable

PDA Ch2 326nm 4nm

| Peak# | Ret. Time | Area    | Height | Area %  | Height % |
|-------|-----------|---------|--------|---------|----------|
| 1     | 20.267    | 375215  | 11066  | 5.422   | 9.762    |
| 2     | 33.839    | 6544956 | 102292 | 94.578  | 90.238   |
| Total |           | 6920170 | 113358 | 100.000 | 100.000  |

5y

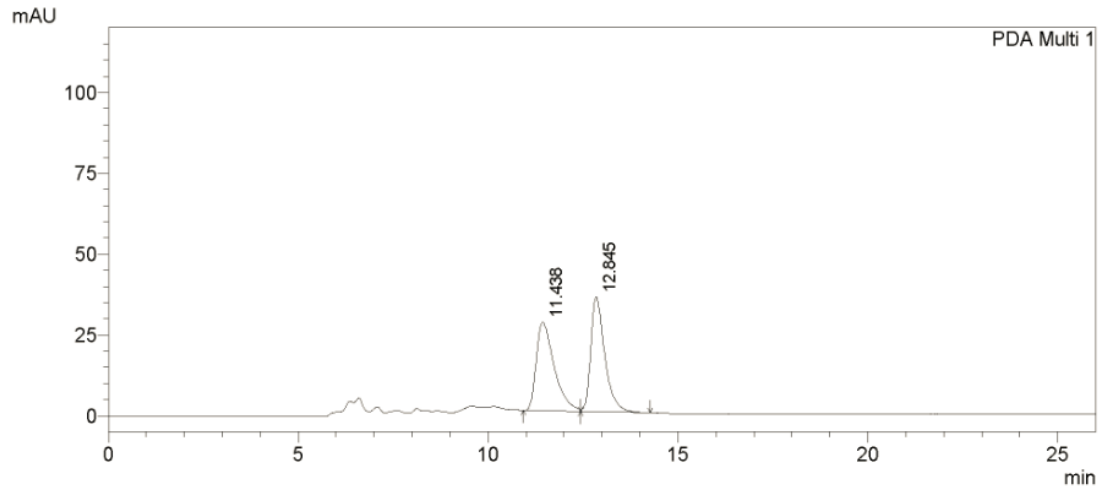

1 PDA Multi 1/254nm 4nm

PeakTable

PDA Ch1 254nm 4nm

| Peak# | Ret. Time | Area    | Height | Area %  | Height % |
|-------|-----------|---------|--------|---------|----------|
| 1     | 11.438    | 903882  | 27398  | 49.607  | 43.541   |
| 2     | 12.845    | 918213  | 35526  | 50.393  | 56.459   |
| Total |           | 1822096 | 62924  | 100.000 | 100.000  |

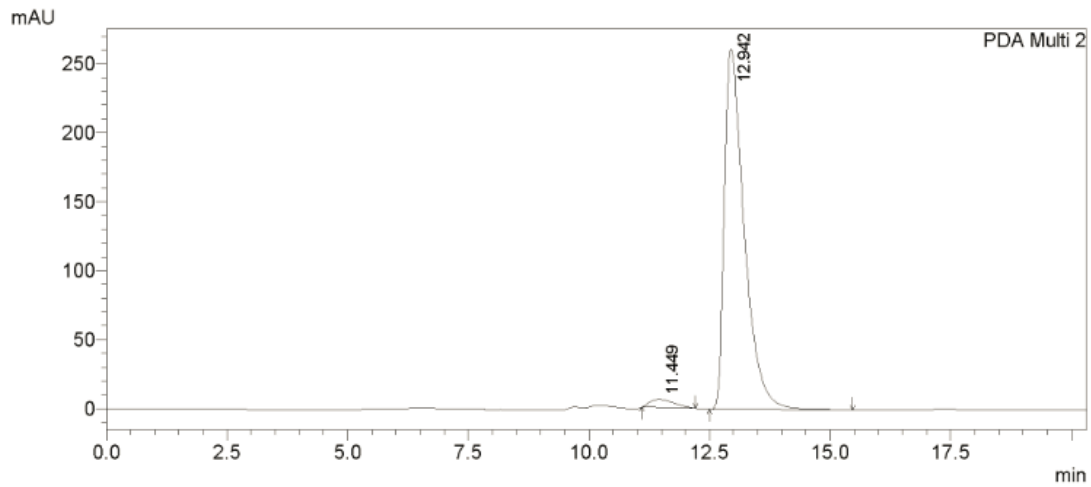

1 PDA Multi 2/254nm 4nm

PeakTable

PDA Ch2 254nm 4nm

| Peak# | Ret. Time | Area    | Height | Area %  | Height % |
|-------|-----------|---------|--------|---------|----------|
| 1     | 11.449    | 204097  | 5892   | 2.658   | 2.208    |
| 2     | 12.942    | 7474562 | 260945 | 97.342  | 97.792   |
| Total |           | 7678659 | 266837 | 100.000 | 100.000  |



5z

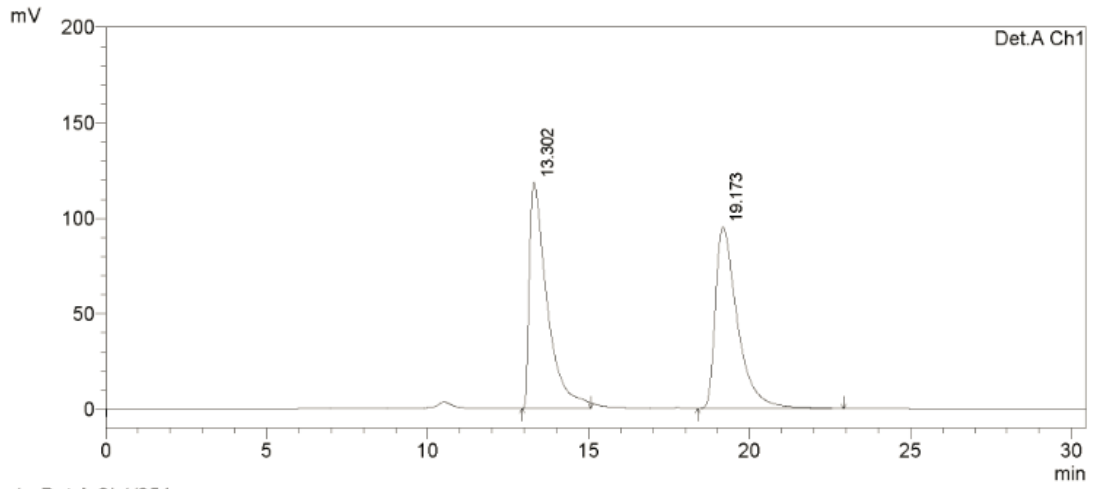

1 Det.A Ch1/254nm

PeakTable

检测器 A Ch1 254nm

| Peak# | Ret. Time | Area    | Height | Area %  | Height % |
|-------|-----------|---------|--------|---------|----------|
| 1     | 13.302    | 4556795 | 118578 | 50.127  | 55.489   |
| 2     | 19.173    | 4533632 | 95120  | 49.873  | 44.511   |
| Total |           | 9090427 | 213698 | 100.000 | 100.000  |

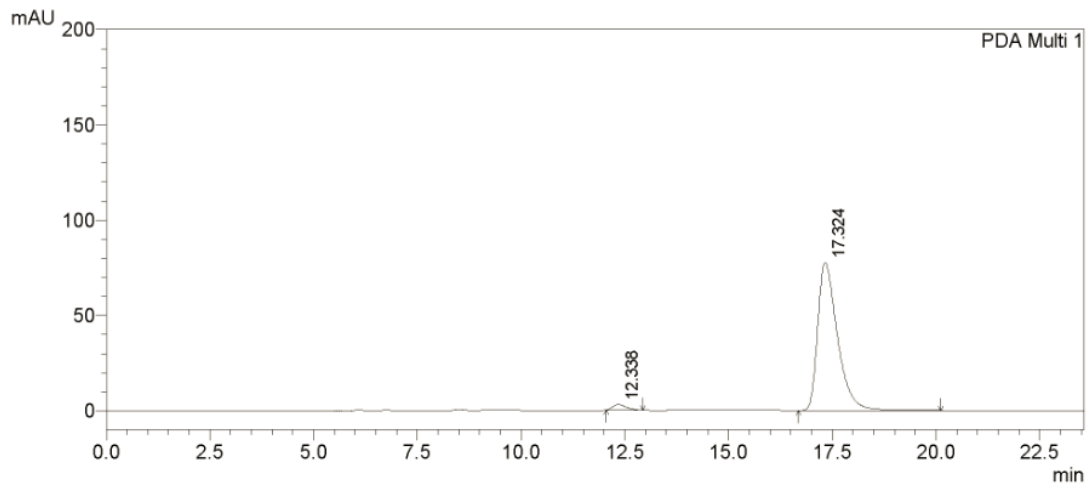

1 PDA Multi 1/254nm 4nm

PeakTable

PDA Ch1 254nm 4nm

| Peak# | Ret. Time | Area    | Height | Area %  | Height % |
|-------|-----------|---------|--------|---------|----------|
| 1     | 12.338    | 68533   | 2958   | 2.542   | 3.659    |
| 2     | 17.324    | 2626989 | 77901  | 97.458  | 96.341   |
| Total |           | 2695522 | 80860  | 100.000 | 100.000  |

5aa

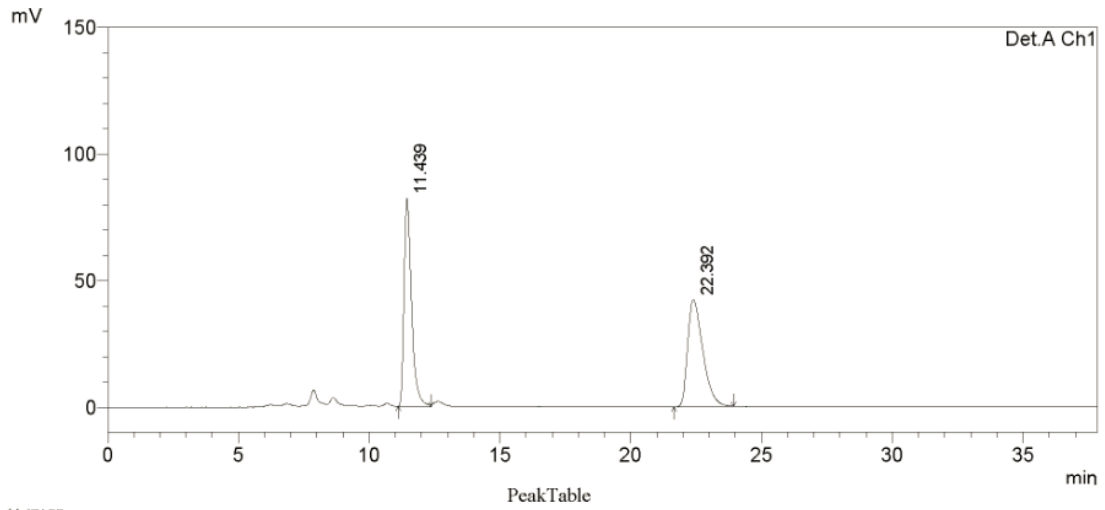

检测器 A Ch1 315nm

| Peak# | Ret. Time | Area    | Height | Area %  | Height % |
|-------|-----------|---------|--------|---------|----------|
| 1     | 11.439    | 1644319 | 82213  | 49.017  | 66.048   |
| 2     | 22.392    | 1710263 | 42262  | 50.983  | 33.952   |
| Total |           | 3354582 | 124474 | 100.000 | 100.000  |

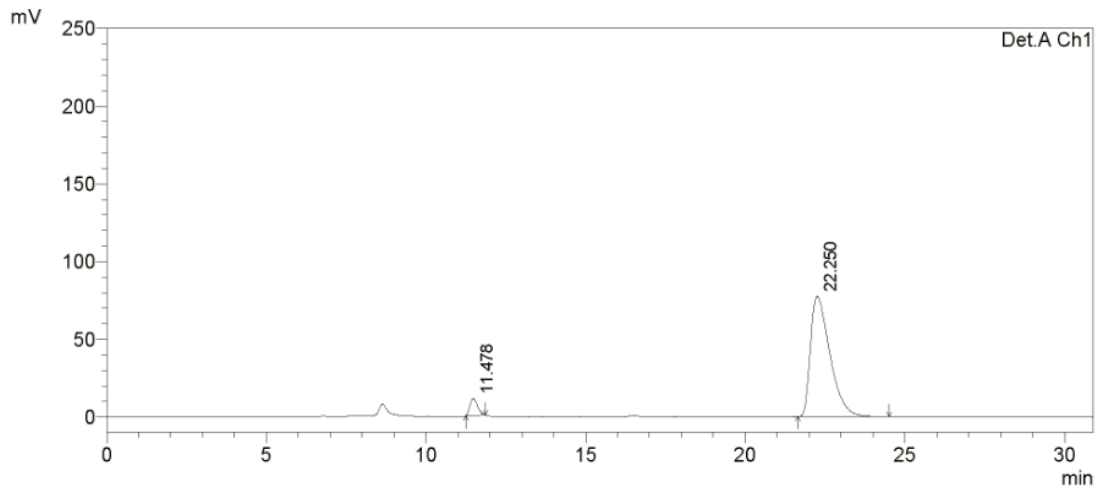

1 Det.A Ch1/315nm

检测器 A Ch1 315nm

| Peak# | Ret. Time | Area    | Height | Area %  | Height % |
|-------|-----------|---------|--------|---------|----------|
| 1     | 11.478    | 178861  | 10871  | 5.153   | 12.315   |
| 2     | 22.250    | 3291878 | 77401  | 94.847  | 87.685   |
| Total |           | 3470739 | 88272  | 100.000 | 100.000  |

# 5ab

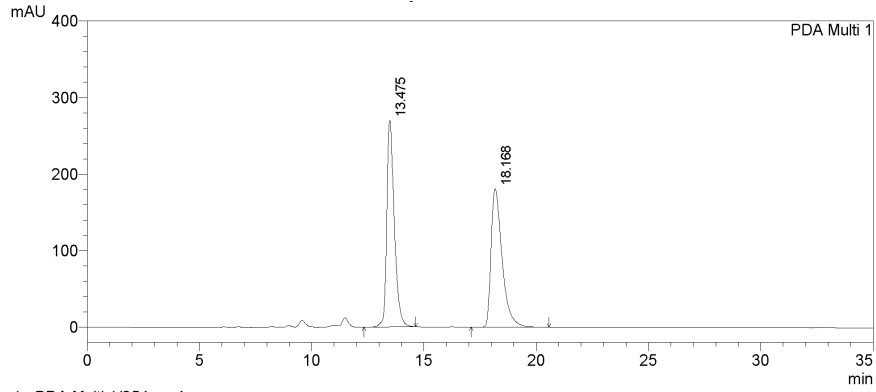

1 PDA Multi 1/254nm 4nm

PeakTable

| Peak# | Ret. Time | Area     | Height | Area %  | Height % |
|-------|-----------|----------|--------|---------|----------|
| 1     | 13.475    | 6298006  | 270082 | 50.349  | 59.880   |
| 2     | 18.168    | 6210780  | 180960 | 49.651  | 40.120   |
| Total |           | 12508786 | 451042 | 100.000 | 100.000  |

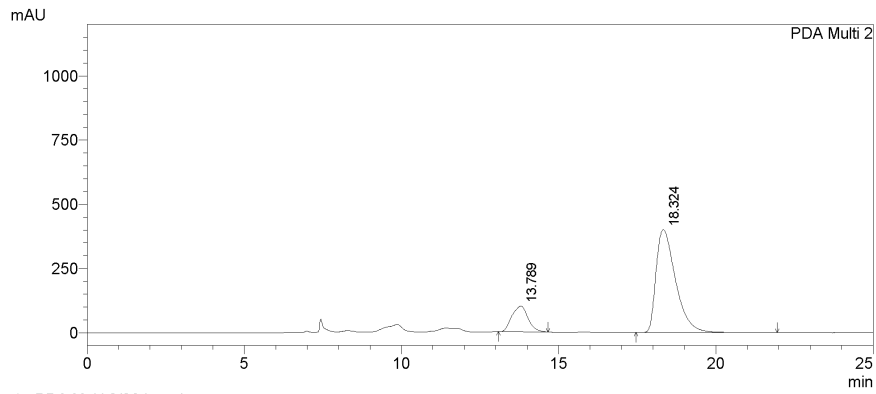

1 PDA Multi 2/264nm 4nm

PeakTable

| Peak# | Ret. Time | Area     | Height | Area %  | Height % |
|-------|-----------|----------|--------|---------|----------|
| 1     | 13.789    | 3580095  | 100456 | 17.150  | 20.053   |
| 2     | 18.324    | 17295614 | 400482 | 82.850  | 79.947   |
| Total |           | 20875710 | 500938 | 100.000 | 100.000  |

# 5ac

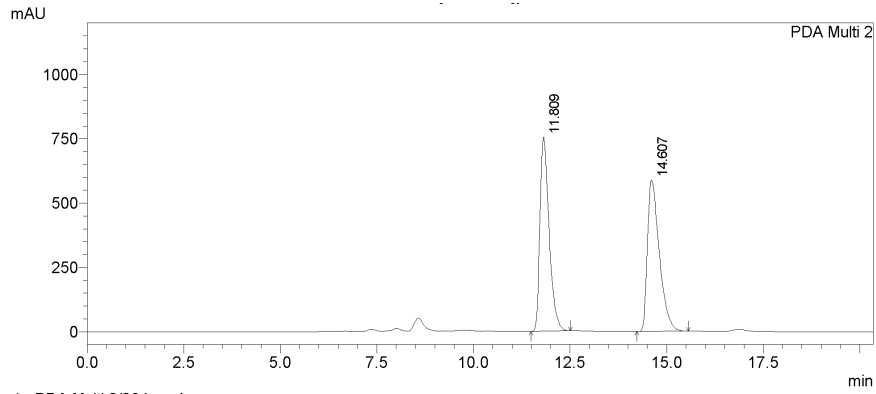

1 PDA Multi 2/284nm 4nm

PeakTable

| Peak# | Ret. Time | Area     | Height  | Area %  | Height % |
|-------|-----------|----------|---------|---------|----------|
| 1     | 11.809    | 12476349 | 754660  | 49.718  | 56.173   |
| 2     | 14.607    | 12617628 | 588791  | 50.282  | 43.827   |
| Total |           | 25093976 | 1343451 | 100.000 | 100.000  |

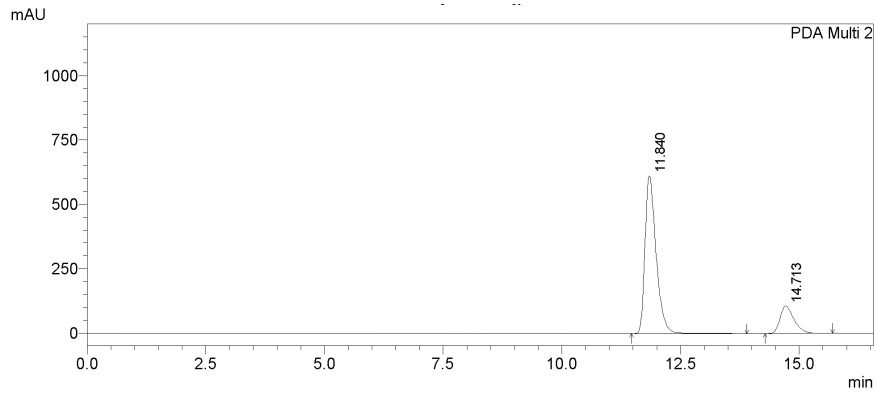

1 PDA Multi 2/284nm 4nm

PeakTable

| Peak# | Ret. Time | Area     | Height | Area %  | Height % |
|-------|-----------|----------|--------|---------|----------|
| 1     | 11.840    | 9931649  | 610996 | 82.112  | 85.185   |
| 2     | 14.713    | 2163653  | 106266 | 17.888  | 14.815   |
| Total |           | 12095302 | 717262 | 100.000 | 100.000  |

**5ad (cannot be resolved into enantiomers)**

**AD-H**

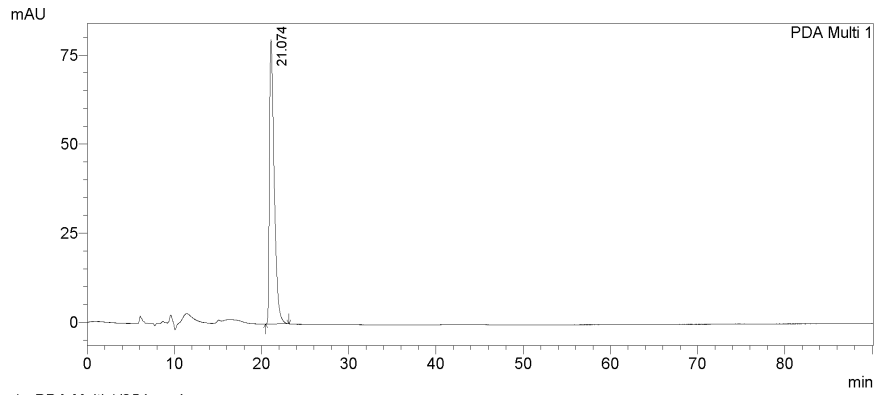

PeakTable

| Peak# | Ret. Time | Area    | Height | Area %  | Height % |
|-------|-----------|---------|--------|---------|----------|
| 1     | 21.074    | 3011988 | 79799  | 100.000 | 100.000  |
| Total |           | 3011988 | 79799  | 100.000 | 100.000  |

**IA**

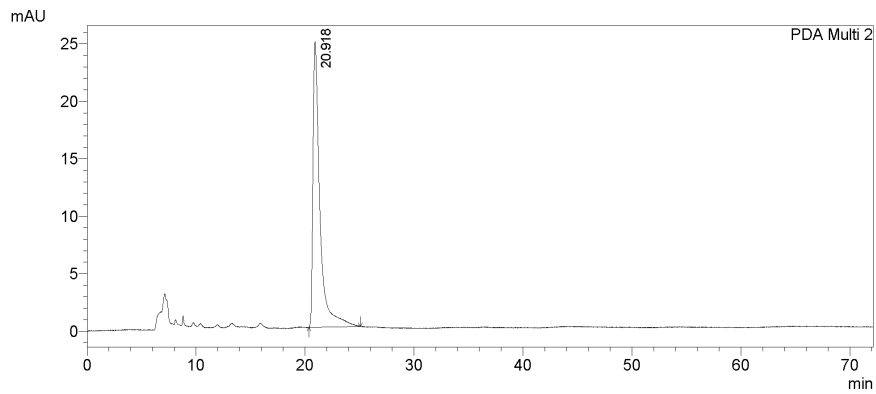

PeakTable

| Peak# | Ret. Time | Area    | Height | Area %  | Height % |
|-------|-----------|---------|--------|---------|----------|
| 1     | 20.918    | 1099963 | 24868  | 100.000 | 100.000  |
| Total |           | 1099963 | 24868  | 100.000 | 100.000  |

ID

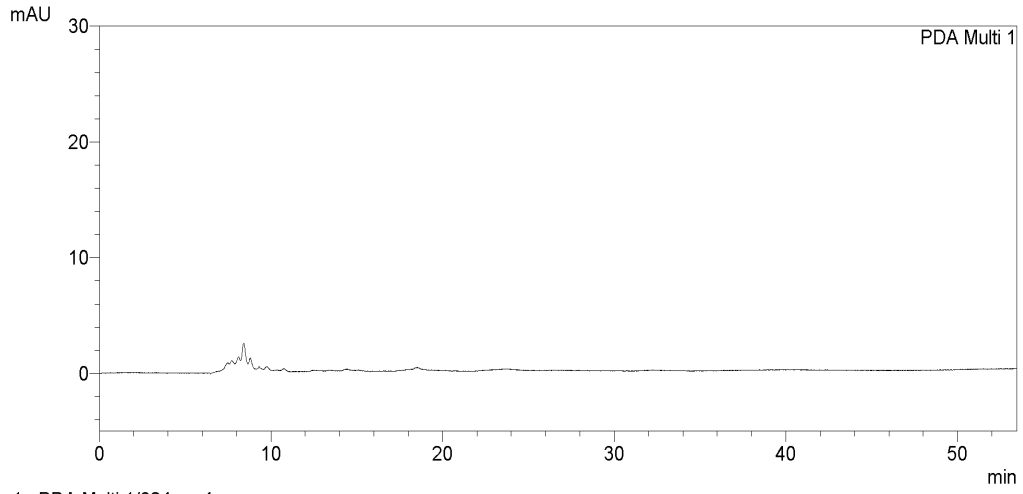

1 PDA Multi 1/324nm 4nm

IBN5

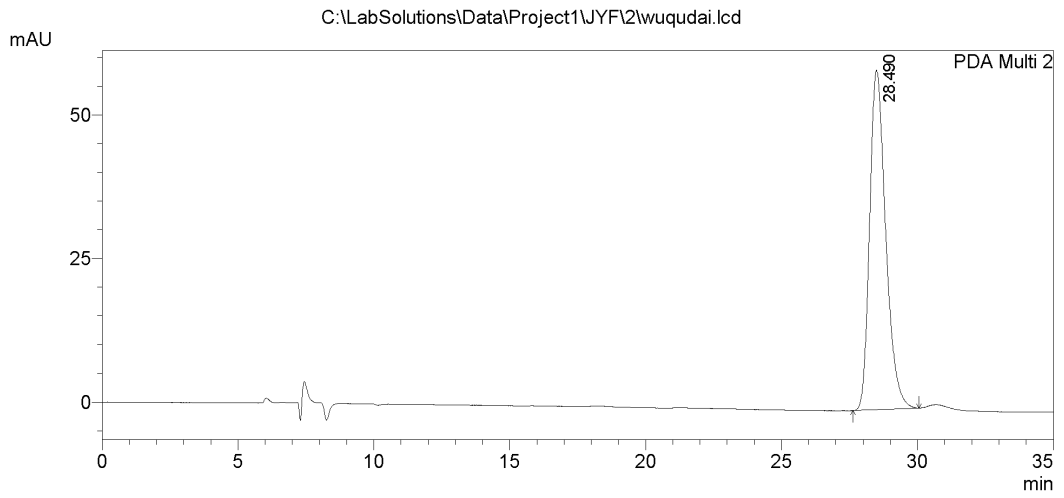

1 PDA Multi 2/279nm 4nm

PeakTable

PDA Ch2 279nm 4nm

| Peak# | Ret. Time | Area    | Height | Area %  | Height % |
|-------|-----------|---------|--------|---------|----------|
| 1     | 28.490    | 2434781 | 59159  | 100.000 | 100.000  |
| Total |           | 2434781 | 59159  | 100.000 | 100.000  |

# 5ae

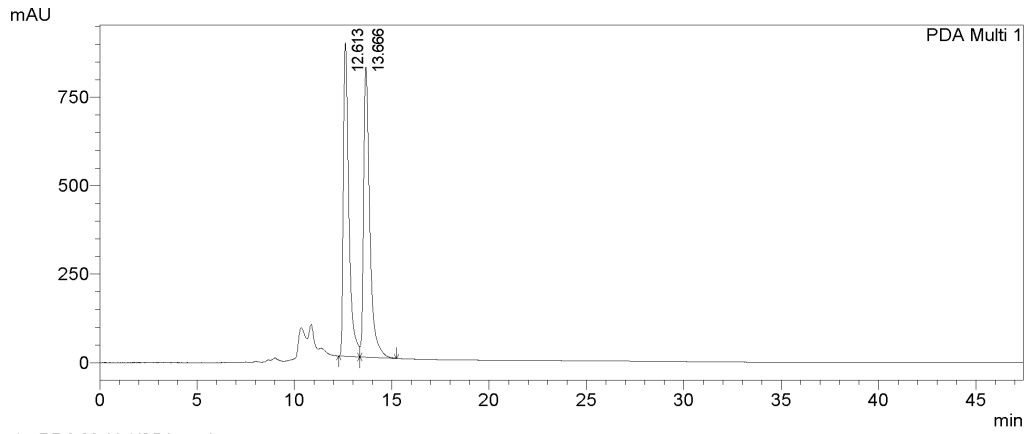

1 PDA Multi 1/254nm 4nm

PeakTable

| Peak# | Ret. Time | Area     | Height  | Area %  | Height % |
|-------|-----------|----------|---------|---------|----------|
| 1     | 12.613    | 17448915 | 885643  | 49.067  | 51.936   |
| 2     | 13.666    | 18112555 | 819621  | 50.933  | 48.064   |
| Total |           | 35561470 | 1705264 | 100.000 | 100.000  |
